# Supplementary material for: Integrative network pharmacology and multi-omics to investigate the potential mechanisms involved in Wumei Wan treatment of colorectal adenomas
Source: Research Square preprint supplement (doi:10.21203/rs.3.rs-6629738/v1), 2025-07-10
Supplement: Supplementary file 1 [file 6ad720914f457f3dee71d117.xlsx]

## Sheet: NEG|MOD_vs_Control
ID	m/z	rt(s)	diff	Name	adduct	score	HMDB	KEGG	SuperClass	Class	SubClass	M1	M2	M3	M4	M5	M6	C1	C2	C3	C5	C6	C7	Average(MOD)	Average(Control)	Fold change	p-value	VIP
M429T297	429.21191	296.8005	diff	(1-acetyloxy-3-hydroxy-6,8a-dimethyl-7-oxo-3-propan-2-yl-2,3a,4,8-tetrahydro-1h-azulen-4-yl) 4-hydroxybenzoate	[M-H]-	0.965521260201725			Lipids and lipid-like molecules	Prenol lipids	Sesquiterpenoids	29009.4	7656.71	12187.6	10545.6	15056.6	22742.9	63723.5	138631	58619.5	28330.1	46243.4	45180.2	16199.8	63454.5	0.255298	0.0153551	1.29579
M747T138	746.51445	137.9475	diff	(2-aminoethoxy)[2-[docosa-4.7.10.13.16.19-hexaenoyloxy]-3-[hexadec-1-en-1-yloxy]propoxy]phosphinic acid	[M-H]-	0.902710983726358	HMDB0005780		Lipids and lipid-like molecules	Glycerophospholipids	Glycerophosphoethanolamines	630831	652541	994057	830318	649500	632829	1.74796e+06	1.57878e+06	1.37229e+06	936725	1.53727e+06	1.56076e+06	731679	1.45563e+06	0.502654	0.000236094	5.80897
M723T139	722.51364	139.0485	diff	(2-aminoethoxy)[3-[hexadec-1-en-1-yloxy]-2-[icosa-5.8.11.14-tetraenoyloxy]propoxy]phosphinic acid	[M-H]-	0.897754397030389	HMDB0011352		Lipids and lipid-like molecules	Glycerophospholipids	Glycerophosphoethanolamines	458789	811985	744762	575106	785859	463456	1.10177e+06	1.00666e+06	891448	558887	858454	878929	639993	882693	0.725046	0.0353715	3.22555
M910T185	909.55119	185.4080	diff	[2-[docosa-4.7.10.13.16.19-hexaenoyloxy]-3-(octadecanoyloxy)propoxy]({[2.3.4.5.6-pentahydroxycyclohexyl]oxy})phosphinic acid	[M-H]-	0.927253111662076	HMDB0009821		Lipids and lipid-like molecules	Glycerophospholipids	Glycerophosphoinositols	456335	272467	439578	503621	370708	393309	375456	369309	47135	28930.5	283474	198414	406003	217120	1.86995	0.0233444	2.41849
M409T191	409.23453	191.1320	diff	1-hexadecanoyl-2-sn-glycero-3-phosphate	[M-H]-	0.903247220352565			Lipids and lipid-like molecules	Glycerophospholipids	Glycerophosphates	66818.7	79813.6	129077	63575.6	48709.8	53207.6	171065	137883	219708	185320	184551	198441	73533.7	182828	0.402201	5.61072e-05	2.29845
M741T144_1	740.52378	144.0940	diff	1-myristoyl-2-palmitoyl-sn-glycero-3-phosphocholine	[M+Cl]-	0.884039023155011	HMDB0007869		Lipids and lipid-like molecules	Glycerophospholipids	Glycerophosphocholines	765272	405099	552145	719327	417894	385711	365805	354095	196416	275251	466400	288296	540908	324377	1.66753	0.0196603	2.11675
M743T145_1	742.54105	144.5775	diff	1-stearoyl-2-linoleoyl-sn-glycero-3-phosphoethanolamine	[M-H]-	0.94685284048613	HMDB0008994		Lipids and lipid-like molecules	Glycerophospholipids	Glycerophosphoethanolamines	7.87483e+06	4.42133e+06	4.79796e+06	6.53562e+06	4.35496e+06	4.95156e+06	3.68586e+06	3.04005e+06	2.21246e+06	2.08525e+06	3.62461e+06	2.79288e+06	5.48938e+06	2.90685e+06	1.88843	0.00238072	8.53007
M757T144	756.55542	144.0275	diff	1,2-dioleoyl-sn-glycero-3-phosphoethanolamine-n-methyl	[M-H]-	0.871600169324424	HMDB0010565		Lipids and lipid-like molecules	Glycerophospholipids	Glycerophosphoethanolamines	256605	206209	196653	245248	155196	164103	98951.4	140925	134139	121001	116341	124732	204002	122682	1.66286	0.00105548	1.49136
M771T142	770.57166	142.2925	diff	1,2-dioleoyl-sn-glycero-3-phosphoethanolamine-n,n-dimethyl	[M-H]-	0.846350144191125	HMDB0010564		Lipids and lipid-like molecules	Glycerophospholipids	Glycerophosphoethanolamines	2.18368e+06	3.09301e+06	1.84799e+06	3.54235e+06	1.63802e+06	2.15265e+06	940587	1.62947e+06	555451	521614	1.08495e+06	743693	2.40962e+06	912627	2.64031	0.00155467	7.13949
M723T158	723.49719	158.0295	diff	1',3'-bis[1,2-dilinoleoyl-sn-glycero-3-phospho]-sn-glycerol	[M-2H]2-	0.814412428769178	HMDB0010692		Lipids and lipid-like molecules	Glycerophospholipids	Glycerophosphoglycerophosphoglycerols	652108	817821	625657	1.7304e+06	1.14313e+06	414757	517439	505984	170345	384952	457504	384331	897312	403426	2.22423	0.033666	3.5378
M319T40	319.22756	40.0020	diff	12s-hydroxy-5z,8z,10e,14z-eicosatetraenoic acid	[M-H]-	0.961806423110626		C14777	Lipids and lipid-like molecules	Fatty Acyls	Eicosanoids	3.47801e+06	3.99006e+06	867069	3.35045e+06	5.14253e+06	1.6435e+06	1.16157e+06	1.12977e+06	697163	109220	740124	1.27048e+06	3.0786e+06	851388	3.61598	0.00728769	8.63755
M467T113	467.37194	113.0550	diff	14,17,20,23,26,29-dotriacontahexaenoic acid, (14z,17z,20z,23z,26z,29z)-	[M-H]-	0.936415855389113			Lipids and lipid-like molecules	Fatty Acyls	Fatty acids and conjugates	72772.7	45472.1	83602.4	57893.3	21968.1	7081.94	97846.5	155485	69889.2	36606.1	111026	146992	48131.7	102974	0.467416	0.032317	1.43798
M271T62	271.22729	62.2580	diff	16-hydroxyhexadecanoic acid	[M-H]-	0.997320083597113	HMDB0006294	C18218	Lipids and lipid-like molecules	Fatty Acyls	Fatty acids and conjugates	271881	85710.4	118812	153685	32532.7	52873.8	244103	416232	290894	155907	351780	278187	119249	289517	0.41189	0.00736831	2.70884
M495T130	495.40265	130.2035	diff	16,19,22,25,28,31-tetratriacontahexaenoic acid, (all-z)-	[M-H]-	0.860972943055974			Lipids and lipid-like molecules	Fatty Acyls	Fatty acids and conjugates	12272.7	4295.36	15478.7	9498.75	2204.45	3619.45	33101.8	52981.6	36200	22702	29921.7	28635.8	7894.91	33923.8	0.232725	0.000277006	1.07947
M739T142	738.50940	142.3265	diff	2-arachidonoyl-1-palmitoyl-sn-glycero-3-phosphoethanolamine	[M-H]-	0.900338305652215	HMDB0008937		Lipids and lipid-like molecules	Glycerophospholipids	Glycerophosphoethanolamines	743814	760912	1.65898e+06	863760	1.11571e+06	613372	628580	607497	434284	459480	783736	596916	959425	585082	1.63981	0.0458315	2.41207
M147T155	147.02917	154.5760	diff	3-hydroxyglutaric acid	[M-H]-	0.783879692217252	HMDB0000428		Organic acids and derivatives	Hydroxy acids and derivatives	Beta hydroxy acids and derivatives	79454.3	105110	91720.3	94365.7	66856.6	67522	101016	93997.3	150534	151577	103581	131762	84171.5	122078	0.689489	0.0116579	1.42643
M121T48	121.02871	48.4440	diff	4-hydroxybenzaldehyde	[M-H]-	0.843306970144617	HMDB0011718	C00633	Organic oxygen compounds	Organooxygen compounds	Carbonyl compounds	173079	157502	119347	236266	451890	171857	72029.9	33306	47824.8	43392.8	72668.6	44776.4	218324	52333.1	4.17181	0.00743424	2.3713
M107T26_2	107.04969	26.2615	diff	4-methylphenol	[M-H]-	0.84797599524612	HMDB0001858	C01468	Benzenoids	Phenols	Cresols	595350	653325	246142	255591	1.48721e+06	302980	110965	148312	131385	113824	93023.2	111966	590099	118246	4.99044	0.0349389	3.68878
M138T269_2	138.04165	268.7670	diff	4-nitrophenol	[M-H]-	0.845134733843121	HMDB0001232	C00870	Benzenoids	Phenols	Nitrophenols	59966	70598.7	126202	1287.49	62194.6	54681.9	4939.8	2078.44	5106.59	17737	34197.9	18287.4	62488.5	13724.5	4.55305	0.0167662	1.04722
M131T149	131.07063	149.0140	diff	6-hydroxyhexanoate	[M-H]-	0.782573620290896	HMDB0012843	C06103	Organic acids and derivatives	Hydroxy acids and derivatives	Medium-chain hydroxy acids and derivatives	160505	39994.9	51291.2	135720	204699	129634	81258.9	64919.9	25523.2	13760.3	36308.9	40844.9	120307	43769.4	2.74866	0.0208697	1.57429
M181T269	181.04739	269.0905	diff	7-methyluric acid	[M-H]-	0.854660707821323	HMDB0011107	C16355	Organoheterocyclic compounds	Imidazopyrimidines	Purines and purine derivatives	70311.9	75394.4	131417	3182.81	70966.2	62860.8	5969.27	21878.3	7579.74	20088.5	20967.2	20044.8	69022.1	16088	4.2903	0.010675	1.12734
M134T105	134.04647	105.4790	diff	Adenine	[M-H]-	0.956740947363804	HMDB0000034	C00147	Organoheterocyclic compounds	Imidazopyrimidines	Purines and purine derivatives	124746	130331	86190.3	75565.4	150334	89093.8	27081.4	23677.8	19640.8	13776.3	29075.9	26317.5	109377	23261.6	4.70203	3.94776e-05	1.77695
M429T34	429.37325	33.8420	diff	alpha-Tocopherol (Vitamin E)	[M-H]-	0.997909869681313	HMDB0001893	C02477	Lipids and lipid-like molecules	Prenol lipids	Quinone and hydroquinone lipids	159178	149914	247770	177714	133667	170880	105557	132967	45070.7	21730.7	60897.2	67663.9	173187	72314.3	2.39492	0.00144135	1.80001
M453T113	453.35823	112.7620	diff	Beta-elemonic acid	[M-H]-	0.751245625134007			Lipids and lipid-like molecules	Prenol lipids	Triterpenoids	6319.01	5872.72	13252.5	10543.9	4022.24	4857.26	47291.6	56380.6	50956.8	20241.3	29123.3	16279.8	7477.95	36712.2	0.203691	0.00209091	1.05626
M465T27_2	465.30528	26.8615	diff	Cholesteryl sulfate	[M-H]-	0.988626925849867	HMDB0000653	C18043	Lipids and lipid-like molecules	Steroids and steroid derivatives	Cholestane steroids	1.48171e+07	1.0984e+07	1.20769e+07	1.76122e+07	4.74068e+06	2.12655e+07	6.63448e+06	7.70965e+06	4.59245e+06	2.17916e+06	5.63944e+06	5.20629e+06	1.35827e+07	5.32691e+06	2.54983	0.00733493	16.1298
M253T49	253.21699	49.2210	diff	Cis-9-palmitoleic acid	[M-H]-	0.999949682762484	HMDB0003229	C08362	Lipids and lipid-like molecules	Fatty Acyls	Fatty acids and conjugates	2.51297e+06	1.35948e+06	1.34801e+06	932159	240557	2.28754e+06	7.80665e+06	1.32566e+07	1.05421e+07	5.49823e+06	8.45599e+06	1.12036e+07	1.44679e+06	9.46053e+06	0.152929	4.73006e-05	18.7754
M129T426	129.01876	426.4460	diff	Cis-aconitate	[M-H-CO2]-	1	HMDB0000072	C00417	Organic acids and derivatives	Carboxylic acids and derivatives	Tricarboxylic acids and derivatives	101395	109320	77144.3	106976	222455	84748.4	44670.9	49029.6	28882.8	19998.9	62075.2	30760.4	117007	39236.3	2.9821	0.00634989	1.65465
M141T354_2	141.01733	353.9440	diff	Cis,cis-muconic acid	[M-H]-	0.999987700657655	HMDB0006331	C02480	Lipids and lipid-like molecules	Fatty Acyls	Fatty acids and conjugates	1.36826e+07	1.35242e+07	1.29917e+07	1.43833e+07	1.42255e+07	1.37728e+07	1.30526e+07	1.35579e+07	4.13279e+06	2.51338e+06	1.26882e+07	7.99485e+06	1.37633e+07	8.98995e+06	1.53097	0.037419	12.8393
M200T301	199.96878	301.1940	diff	Cysteine-s-sulfate	[M-H]-	0.973205592434035	HMDB0000731	C05824	Organic acids and derivatives	Carboxylic acids and derivatives	Amino acids, peptides, and analogues	55238.3	73856.5	16779	81387.5	48046.3	44815.4	32063.2	26663.7	13592.6	9077.83	25010.5	19874.7	53353.8	21047.1	2.53497	0.00915433	1.02392
M165T37	165.04064	36.9035	diff	D-arabinonic acid	[M-H]-	0.708990557521635	HMDB0000539	C00878	Organic oxygen compounds	Organooxygen compounds	Carbohydrates and carbohydrate conjugates	727499	584680	667675	751400	550126	566767	783775	1.02669e+06	1.19482e+06	1.10137e+06	570405	825254	641358	917053	0.699368	0.0213351	3.78538
M195T381	195.05025	380.7590	diff	D-gluconate	[M-H]-	0.951222262171453	HMDB0000625	C00257	Organic oxygen compounds	Organooxygen compounds	Carbohydrates and carbohydrate conjugates	27807.7	49271.8	42024.3	32982.3	41211.6	38529.3	84814.8	75940.2	42408.8	27786.5	113678	69204.6	38637.9	68972.1	0.560195	0.0403454	1.08474
M114T311_2	114.05537	311.0525	diff	D-proline	[M-H]-	1	HMDB0003411	C00763	Organic acids and derivatives	Carboxylic acids and derivatives	Amino acids, peptides, and analogues	174581	110869	151266	175913	121001	125906	73039.5	65368.6	38449.3	42050.7	71340.5	54392.4	143256	57440.2	2.49401	6.03564e-05	1.72079
M103T192	103.03939	191.6800	diff	Dl-a-hydroxybutyric acid	[M-H]-	0.999049908516402	HMDB0000008	C05984	Organic acids and derivatives	Hydroxy acids and derivatives	Alpha hydroxy acids and derivatives	171189	123474	116728	193387	92250.5	244665	74923.9	114237	43242.7	16398.3	66718.6	69602	156949	64187.2	2.44517	0.00609356	1.72382
M146T31	146.02424	30.7660	diff	DL-Glutamic acid	[M-H]-	0.754821956705536	HMDB0060475	C00025	Organic acids and derivatives	Carboxylic acids and derivatives	Amino acids, peptides, and analogues	53824.9	103619	18549.8	118796	142059	53907.6	10956.3	5266.89	23073.4	12608	7293.95	12804	81792.6	12000.4	6.8158	0.00478885	1.53405
M171T380	171.00559	379.8070	diff	Glycerophosphate(2)	[M-H]-	0.999154686360038	HMDB0000126	C00093	Lipids and lipid-like molecules	Glycerophospholipids	Glycerophosphates	25453.7	15926.6	19890.5	21864	15690.4	15272.1	49939.5	56849.6	38442.8	27288.5	46372.2	31923.8	19016.2	41802.7	0.454904	0.000897302	1.01163
M172T183	172.09733	183.0910	diff	Hexanoylglycine	[M-H]-	0.999292445005922	HMDB0000701		Organic acids and derivatives	Carboxylic acids and derivatives	Amino acids, peptides, and analogues	31491.1	26487.9	33259.6	24049.4	37551.9	28854.4	117926	126206	37764.2	101999	166007	108720	30282.4	109770	0.27587	0.00094435	1.73961
M154T435	154.06170	435.4315	diff	Histidine	[M-H]-	0.98581042545978	HMDB0000177	C00135	Organic acids and derivatives	Carboxylic acids and derivatives	Amino acids, peptides, and analogues	364478	429386	382781	506423	348740	141599	295059	236385	98787.5	2605.76	272721	225997	362234	188593	1.92072	0.0289702	2.10908
M361T175	361.20103	175.0670	diff	Humulone	[M-H]-	0.978646883132872		C10695	Organic oxygen compounds	Organooxygen compounds	Carbonyl compounds	48387.7	47232.2	44183.1	94726.6	73698.7	58306.5	14326.2	18064	5382.23	2371.24	12111.9	8676.97	61089.1	10155.4	6.01542	0.000119099	1.4078
M267T214	267.07317	214.0625	diff	Inosine	[M-H]-	0.999386491267315	HMDB0000195	C00294	Nucleosides, nucleotides, and analogues	Purine nucleosides		148640	365077	822865	15584.4	263202	369655	13153.2	11359	14928.5	9003.99	9336.47	14093.1	330837	11979	27.618	0.0179789	2.83975
M147T111	147.04477	111.2950	diff	L-Arabinono-1,4-lactone	[M-H]-	0.706573717860529		C01114				25628.6	7911.99	36488.6	20087.4	20165.3	40111.2	42631.5	39714.8	94070.6	79792.7	41897.3	73560	25065.5	61944.5	0.404645	0.00636783	1.31369
M174T389	174.08769	388.5815	diff	L-citrulline	[M-H]-	0.993399781219502	HMDB0000904	C00327	Organic acids and derivatives	Carboxylic acids and derivatives	Amino acids, peptides, and analogues	120918	196283	141226	172759	209875	144747	74075.2	58157.4	48983.3	57521.3	52642	36256.1	164301	54605.9	3.00886	2.54672e-05	2.03366
M157T182_2	157.03615	181.9090	diff	L-dihydroorotate	[M-H]-	0.979800539920672	HMDB0003349	C00337	Organic acids and derivatives	Carboxylic acids and derivatives	Amino acids, peptides, and analogues	1.51964e+06	2.30589e+06	1.37441e+06	1.5142e+06	3.47434e+06	1.28941e+06	867949	945272	258003	80079.9	1.07041e+06	619438	1.91298e+06	640192	2.98814	0.00758075	6.87408
M279T43	279.23294	42.6680	diff	Linoleic acid	[M-H]-	0.999910640970766	HMDB0000673	C01595	Lipids and lipid-like molecules	Fatty Acyls	Lineolic acids and derivatives	9.33323e+06	8.02778e+06	1.02396e+07	8.66532e+06	3.93875e+06	6.92614e+06	1.43792e+07	3.13236e+07	2.49319e+07	2.01921e+07	2.60756e+07	2.4365e+07	7.85513e+06	2.35446e+07	0.333628	9.60117e-05	27.1162
M294T39	293.99206	38.6110	diff	Meclofenamate	[M-H]-	0.921416966154863	HMDB0015074	C02996	Benzenoids	Benzene and substituted derivatives	Benzoic acids and derivatives	38972.1	100030	15275.6	58792.7	107261	74305.7	3520.37	3686.98	4998.91	5475.07	2027.73	2644.22	65772.8	3725.55	17.6545	0.00160147	1.52975
M496T106	496.27197	106.2220	diff	Microcystin lr	[M-2H]2-	0.924240258165513		C05371	Organic acids and derivatives	Peptidomimetics	Hybrid peptides	34149	26037.9	77955.4	92944.6	98530.9	50510.2	10172.4	24473.9	7033.72	10154.3	11675.4	13589.9	63354.7	12849.9	4.93034	0.00276146	1.27376
M227T52	227.20130	51.7305	diff	Myristic acid	[M-H]-	0.998509921314326	HMDB0000806	C06424	Lipids and lipid-like molecules	Fatty Acyls	Fatty acids and conjugates	1.13864e+06	573585	564855	647351	219813	980085	1.49215e+06	2.04104e+06	2.86758e+06	2.18827e+06	1.79204e+06	2.54138e+06	687388	2.15374e+06	0.319159	0.000128576	8.2312
M699T88	698.55737	88.1435	diff	N-[3-hydroxy-1-{[3.4.5-trihydroxy-6-(hydroxymethyl)oxan-2-yl]oxy}octadec-4-en-2-yl]hexadecanamide	[M-H]-	0.839785901926322	HMDB0004971		Lipids and lipid-like molecules	Sphingolipids	Glycosphingolipids	227200	367523	232555	239096	193058	383843	37360.9	43072.9	34659.4	27869.2	40377.5	46125.7	273879	38244.3	7.16131	3.15285e-05	3.02721
M809T82	808.66796	81.5100	diff	N-[3-hydroxy-1-{[3.4.5-trihydroxy-6-(hydroxymethyl)oxan-2-yl]oxy}octadec-4-en-2-yl]tetracos-15-enamide	[M-H]-	0.813707258533117	HMDB0004975		Lipids and lipid-like molecules	Sphingolipids	Glycosphingolipids	36464.7	38768	30595.9	38772.2	33510.8	89364.8	13450.2	12019.6	1835.34	2957.49	13458.6	17651.2	44579.4	10228.7	4.35825	0.00447486	1.08288
M188T375	188.05553	375.1835	diff	N-acetyl-l-glutamate	[M-H]-	0.976416705235842	HMDB0001138	C00624	Organic acids and derivatives	Carboxylic acids and derivatives	Amino acids, peptides, and analogues	37591.2	86803.7	35250.5	58327.5	126982	54491	10439.8	10046.6	6034.57	6472.27	19585.5	7899.75	66574.4	10079.8	6.60476	0.00284755	1.44168
M206T182	206.08142	181.5885	diff	N-acetyl-l-phenylalanine	[M-H]-	0.878165017882068	HMDB0000512	C03519	Organic acids and derivatives	Carboxylic acids and derivatives	Amino acids, peptides, and analogues	58058.9	38292.4	33181.6	66391.1	82617	52295.6	20794.9	23927.1	19909.2	12013.3	27184.8	14969.4	55139.4	19799.8	2.78485	0.0010809	1.11435
M144T212	144.06589	211.6380	diff	N-isobutyrylglycine	[M-H]-	0.997152035000769	HMDB0000730		Organic acids and derivatives	Carboxylic acids and derivatives	Amino acids, peptides, and analogues	12637.3	11679.7	15844.9	14002.3	24471.9	16659.5	69188.2	80827.7	27342.4	32545.8	75143.5	46351.3	15882.6	55233.2	0.287556	0.00204515	1.27148
M158T196	158.06051	195.6435	diff	N-isovaleroylglycine	[M-H]-	0.917145207042972	HMDB0000678		Organic acids and derivatives	Carboxylic acids and derivatives	Amino acids, peptides, and analogues	211656	130759	237836	206133	81686.3	230645	239595	235418	505194	426719	259853	399162	183119	344323	0.531824	0.0128127	2.90918
M537T36	536.50340	36.3030	diff	N-palmitoyl-d-sphingosine	[M-H]-	0.883851461517142	HMDB0004949		Lipids and lipid-like molecules	Sphingolipids	Ceramides	53928.2	163276	101897	72133.7	43000.5	339353	29880.2	54951.4	23555.3	9921.03	20903.7	5663.78	128931	24145.9	5.33967	0.0466195	1.74019
M362T37	362.23589	37.4790	diff	N-palmitoyltaurine	[M-H]-	0.996396701765644			Lipids and lipid-like molecules	Fatty Acyls	Fatty amides	143860	115053	88782.2	164042	87713.3	104006	68775.5	96835.3	49781.4	25434.1	43051.1	33166	117243	52840.6	2.2188	0.00297567	1.42585
M255T50_1	255.23342	49.5960	diff	Palmitic acid	[M-H]-	0.999764255531914	HMDB0000220	C00249	Lipids and lipid-like molecules	Fatty Acyls	Fatty acids and conjugates	3.35456e+07	1.48566e+07	2.97633e+07	2.38611e+07	7.41373e+06	1.34854e+07	3.90745e+07	4.38752e+07	4.86299e+07	3.85658e+07	4.00249e+07	4.66272e+07	2.04876e+07	4.27996e+07	0.478687	0.000576367	33.579
M841T140	840.57680	140.0510	diff	Pc(16:0e/8-hepe)	[M+Hac-H]-	0.930680100190001			Lipids and lipid-like molecules	Glycerophospholipids	Glycerophosphocholines	285487	451977	565382	345818	391698	368647	292735	302060	259763	198321	298622	302679	401502	275697	1.45632	0.0152544	1.58954
M817T144	816.57753	143.5800	diff	Pc(16:1e/9-hode)	[M+Hac-H]-	0.858872529209202			Lipids and lipid-like molecules	Glycerophospholipids	Glycerophosphocholines	1.48893e+06	1.24621e+06	1.51135e+06	1.44069e+06	1.04695e+06	1.13374e+06	1.03828e+06	1.11466e+06	670118	576862	1.0629e+06	857861	1.31131e+06	886780	1.47874	0.00581455	3.30089
M869T83	868.60637	83.2830	diff	Pc(18:1e/12-hete)	[M+Hac-H]-	0.824433764161305			Lipids and lipid-like molecules	Glycerophospholipids	Glycerophosphocholines	33652.4	43811	52571.5	36928.8	42282.3	66220	33928.7	37042.7	292.017	162.434	23893	704.315	45911	16003.8	2.86875	0.00629816	1.03547
M869T121	868.60465	121.2585	diff	Pc(18:1e/14,15-eet)	[M+Hac-H]-	0.883732548269569			Lipids and lipid-like molecules	Glycerophospholipids	Glycerophosphocholines	87896.8	164435	150202	71123.7	120176	242938	72413.2	89063.5	2486.43	170.046	81681	59604.2	139462	50903.1	2.73976	0.0144959	1.67022
M893T138	892.60710	137.5375	diff	Pc(18:1e/20-hdohe)	[M+Hac-H]-	0.906564562567777			Lipids and lipid-like molecules	Glycerophospholipids	Glycerophosphocholines	83843	91944.5	121520	90034.6	123493	162924	62225.3	75335	65135.6	42204.8	74413.3	70816.3	112293	65021.7	1.72701	0.00506595	1.13111
M845T126	844.60763	126.1780	diff	Pc(18:1e/9-hode)	[M+Hac-H]-	0.834465690995377			Lipids and lipid-like molecules	Glycerophospholipids	Glycerophosphocholines	312936	242356	265908	289065	243642	539234	185895	142538	8392.45	4179.46	173934	52659.8	315524	94599.8	3.33535	0.00313561	2.79312
M795T139	794.57129	138.6410	diff	Pe 40:4	[M-H]-	0.835420985467185			Lipids and lipid-like molecules	Glycerophospholipids	Glycerophosphoethanolamines	690368	1.45898e+06	1.42536e+06	657889	850079	1.43873e+06	599413	567090	409029	271741	524370	681727	1.0869e+06	508895	2.13581	0.00711089	4.03244
M241T50	241.21650	50.4700	diff	Pentadecanoic Acid	(M-H)-	0.6576	HMDB0000826	C16537	Lipids and lipid-like molecules	Fatty Acyls	Fatty acids and conjugates	168232	68909.2	83821.2	116425	45992.2	90816.8	118821	235455	234336	210070	161530	235705	95699.3	199320	0.48013	0.00284948	2.21234
M93T26	93.03402	26.4450	diff	Phenol	[M-H]-	0.943374471772529	HMDB0000228	C00146	Benzenoids	Phenols	1-hydroxy-4-unsubstituted benzenoids	125507	651727	63151	752832	366168	270695	69400.6	80448.6	153774	169188	92904.9	63997.6	371680	104952	3.54142	0.0434954	2.64249
M164T265_2	164.07102	264.7450	diff	Phenylalanine	[M-H]-	0.985967256895698	HMDB0000159	C00079	Organic acids and derivatives	Carboxylic acids and derivatives	Amino acids, peptides, and analogues	475915	399676	330213	533711	693555	528586	167774	163612	127571	75699.6	212252	169876	493609	152798	3.23048	9.58674e-05	3.61945
M856T108	855.50442	108.4990	diff	Pi 36:5	[M-H]-	0.936427885168275			Lipids and lipid-like molecules	Glycerophospholipids	Glycerophosphoinositols	154403	297846	131742	162257	190930	92414.5	113913	102300	74505.5	67162.6	109237	72207.2	171599	89887.4	1.90904	0.0209156	1.40348
M882T186	881.51930	186.4125	diff	Pi 38:6	[M-H]-	0.950194081711818						223722	149059	192504	226765	185662	165772	148724	156850	42876.3	24388.2	144890	62168.9	190581	96649.5	1.97187	0.00663915	1.76228
M900T107	899.53482	107.1920	diff	Pi(18:1/15-hete)	[M-H]-	0.902029411950861			Lipids and lipid-like molecules	Glycerophospholipids	Glycerophosphoinositols	68066.6	92068.8	68208.5	88906.5	107250	83619.9	40533	48841.7	30432	41176.8	42809.9	55015.9	84686.6	43134.9	1.9633	0.000146311	1.18376
M463T36	463.30919	36.2990	diff	ponasterone A	(M-H)-	0.6424						26480.3	11182.5	25259.9	24038.2	8731.72	10478.8	106857	146432	81911.8	43869.7	92929.5	83368.6	17695.3	92561.5	0.191173	0.000356145	1.79359
M87T123	87.00831	122.9250	diff	Pyruvate	[M-H]-	0.947677245946703	HMDB0000243	C00022	Organic acids and derivatives	Keto acids and derivatives	Alpha-keto acids and derivatives	159366	267515	158610	172693	57085.5	76862.1	383883	350481	497809	172408	274608	302115	148689	330217	0.450276	0.00749162	2.6601
M283T167_2	283.26324	166.9750	diff	Stearic acid	(M-H)-	0.8184	HMDB0000827	C01530	Lipids and lipid-like molecules	Fatty Acyls	Fatty acids and conjugates	52113.7	47745.7	35706.9	57100.9	54238.8	55927.8	22470	24462.3	17588.1	14255.9	23377.4	19357	50472.3	20251.8	2.49224	8.01631e-06	1.07817
M498T156	498.28841	155.8090	diff	Taurochenodeoxycholate	[M-H]-	0.993777795525228	HMDB0000951	C05465	Lipids and lipid-like molecules	Steroids and steroid derivatives	Bile acids, alcohols and derivatives	145093	74344.9	372194	544547	802152	456399	72683.5	276111	35980.8	94691.6	94858	169868	399121	124032	3.21789	0.0374696	2.80901
M167T190	167.02004	189.6450	diff	Uric acid	(M-H)-	0.7198	HMDB0000289	C00366	Organoheterocyclic compounds	Imidazopyrimidines	Purines and purine derivatives	84560.4	100089	174276	23518	134601	74776	31816.9	44039.8	37216.8	27890.1	30595.5	50671	98636.7	37038.3	2.6631	0.0166534	1.14347
M151T214	151.02570	214.4400	diff	Xanthine	[M-H]-	0.948726467645493	HMDB0000292	C00385	Organoheterocyclic compounds	Imidazopyrimidines	Purines and purine derivatives	474001	420695	1.21441e+06	8983.24	397982	385908	72873.1	27638.6	63663.9	104936	5245.85	213635	483663	81332.1	5.94676	0.034113	2.91547
M421T346	421.06497	345.6480	nodiff	.alpha.,.alpha.'-trehalose 6-phosphate	[M-H]-	0.991116504633275	HMDB0001124	C00689	Organic oxygen compounds	Organooxygen compounds	Carbohydrates and carbohydrate conjugates	1619.69	1066.16	1128.94	1573.78	6706.12	1715.5	788.208	614.125	657.373	470.693	812.625	761.898	2301.7	684.153	3.3643	0.0989446	0.213039
M153T28	153.01876	27.6620	nodiff	.beta.-resorcylic acid	[M-H]-	0.864236676591461	HMDB0029666		Benzenoids	Benzene and substituted derivatives	Benzoic acids and derivatives	18582	10022.3	4711.39	11459.2	26763.7	5199.87	9941.54	10108.6	8017.13	3432.28	5858.28	7125.66	12789.7	7413.92	1.7251	0.168536	0.348405
M407T188	407.27925	187.7750	nodiff	.gamma.-muricholic acid	[M-H]-	0.99543928302955		C17649	Lipids and lipid-like molecules	Steroids and steroid derivatives	Bile acids, alcohols and derivatives	9702.57	8243.49	69679.6	109252	4627.23	49979.4	36850.1	58893.1	33929.3	18702	31724.9	17718.7	41914.1	32969.7	1.27129	0.635731	0.304318
M348T60	348.18395	60.2460	nodiff	(1-(5-fluoropentyl)-1h-indazole-3-carbonyl)-l-valine	[M-H]-	0.94179760223462			Organic acids and derivatives	Carboxylic acids and derivatives	Amino acids, peptides, and analogues	9266.57	5674.83	6587.48	8746.97	3734.72	3821.33	846.037	2312.52	1134.47	724.857	1709.2	1023.56	6305.32	1291.78	4.88113	0.00051508	0.399577
M351T62	351.18368	61.5700	nodiff	(2-acetyloxy-3,6-diphenylcyclohexyl) acetate	[M-H]-	0.826503475751171						25151.7	4343.75	13180.9	73961.8	7279.29	16234.3	14958.7	4290.49	4839.63	2678.71	7429.25	4064.34	23358.6	6376.85	3.66304	0.143794	0.585395
M773T136	772.53018	136.2055	nodiff	(2-aminoethoxy)[2-[docosa-4.7.10.13.16.19-hexaenoyloxy]-3-[octadeca-1.9-dien-1-yloxy]propoxy]phosphinic acid	[M-H]-	0.801866745499907	HMDB0011460		Lipids and lipid-like molecules	Glycerophospholipids	Glycerophosphoethanolamines	132936	162952	242561	228021	172737	158528	249820	238126	183769	129917	271712	227937	182956	216880	0.84358	0.243837	1.20546
M425T28	425.25668	27.6070	nodiff	(2e,6e,10e)-13-[(2r)-6-hydroxy-2,8-dimethyl-3,4-dihydrochromen-2-yl]-2,6,10-trimethyltrideca-2,6,10-trienoic acid	[M-H]-	0.96079111586667			Lipids and lipid-like molecules	Prenol lipids	Quinone and hydroquinone lipids	7460.29	11476.2	12374.9	10802.9	5813.95	7276.53	9135.1	25336.7	4546.95	8615.46	15626	11293.9	9200.81	12425.7	0.740467	0.333133	0.276032
M593T178	593.27272	177.5730	nodiff	(2r,3s,4s,5r,6r)-6-[1,7-bis(4-hydroxyphenyl)heptan-3-yloxy]-5-[(2s,3r,4r)-3,4-dihydroxy-4-(hydroxymethyl)oxolan-2-yl]oxy-2-(hydroxymethyl)oxane-3,4-diol	[M-H]-	0.759271868351433			Phenylpropanoids and polyketides	Diarylheptanoids	Linear diarylheptanoids	61693.4	37591.6	19196.8	61860.5	28841.5	21458.5	65118.6	52978.1	28781.3	22509.2	69604.4	34462.7	38440.4	45575.7	0.84344	0.539924	0.415923
M493T26	493.33451	26.4595	nodiff	(2s,3r,5r,10r,13r,14s,17s)-2,3,14-trihydroxy-10,13-dimethyl-17-[(2r,3r,5r)-2,3,6-trihydroxy-5,6-dimethylheptan-2-yl]-2,3,4,5,9,11,12,15,16,17-decahydro-1h-cyclopenta[a]phenanthren-6-one	[M-H]-	0.932761198082384			Lipids and lipid-like molecules	Steroids and steroid derivatives	Bile acids, alcohols and derivatives	28826.6	14422.4	21845.4	29533.2	8862.93	34131.1	24342.7	22792.1	8780.2	3610.09	16131.7	13358.2	22936.9	14835.9	1.54605	0.146751	0.397114
M243T297	243.13404	296.7090	nodiff	(5e)-3,4,9-trihydroxy-2-propyl-2,3,4,7,8,9-hexahydrooxecin-10-one	[M-H]-	0.887840379135147						5956.71	5712.88	6603.58	11206.7	7261.86	4909.93	21521.5	10024.6	4506.85	7121.1	22057.2	11485.7	6941.95	12786.2	0.542927	0.0930194	0.414071
M263T62	263.12706	61.6520	nodiff	(9e)-11a-hydroxy-3,6,10-trimethyl-6,7,8,11-tetrahydro-4h-cyclodeca[b]furan-2,5-dione	[M-H]-	0.80080258314174			Lipids and lipid-like molecules	Prenol lipids	Terpene lactones	8004.04	3845.72	1909.62	4237.15	12912.9	2941.75	3899.67	4958.24	3447.59	6290.83	3799.41	2372.11	5641.86	4127.97	1.36674	0.412296	0.0986168
M393T231	393.26402	231.3490	nodiff	(r)-butaprost (free acid)	[M-H]-	0.988122421335511			Lipids and lipid-like molecules	Fatty Acyls	Eicosanoids	2507.33	2208.78	2936.01	10784.7	5877.89	3662.2	118.842	97.9673	100.504	37.0182	213.699	445.174	4662.82	168.867	27.6123	0.00726041	0.380304
M836T126	835.51906	126.4860	nodiff	[2-(hexadecanoyloxy)-3-[octadec-11-enoyloxy]propoxy]({[2.3.4.5.6-pentahydroxycyclohexyl]oxy})phosphinic acid	[M-H]-	0.928954644618338	HMDB0009822		Lipids and lipid-like molecules	Glycerophospholipids	Glycerophosphoinositols	52428.6	19368.8	63249.1	64915.4	26314.9	56590.7	42378.5	44670.3	23830.3	26522.6	42084.8	42187.5	47144.6	36945.7	1.27605	0.273222	0.342995
M860T119	859.53500	119.2920	nodiff	[3-(hexadecanoyloxy)-2-[icosa-5.8.11-trienoyloxy]propoxy]({[2.3.4.5.6-pentahydroxycyclohexyl]oxy})phosphinic acid	[M-H]-	0.973315232078227	HMDB0009787		Lipids and lipid-like molecules	Glycerophospholipids	Glycerophosphoinositols	133106	240231	65980.8	149993	107774	77867.8	102998	78518.2	47155.9	46946.4	175890	68424.6	129159	86655.6	1.49048	0.219834	0.844919
M380T302	380.09717	302.1865	nodiff	1-(1-2r-phosphothiotidyl)inositol-3,4-bisphosphate	[M-2H]2-	0.902731520908547			Organic oxygen compounds	Organooxygen compounds	Alcohols and polyols	9277.07	6805.95	8756.41	2969.17	7327.18	11290.6	11378.8	3785.51	3483.09	8811.2	1841.85	5674.3	7737.73	5829.12	1.32743	0.331904	0.175812
M775T137	774.54528	136.8435	nodiff	1-(1z-octadecenyl)-2-(4z,7z,10z,13z,16z,19z-docosahexaenoyl)-sn-glycero-3-phosphoethanolamine	[M-H]-	0.967923854117485						683221	706632	1.09661e+06	882602	744069	839758	1.56851e+06	1.3551e+06	688328	498012	1.42066e+06	1.11319e+06	825482	1.1073e+06	0.74549	0.16054	3.15468
M751T591	750.54164	590.7745	nodiff	1-(1z-octadecenyl)-2-(5z,8z,11z,14z-eicosatetraenoyl)-sn-glycero-3-phosphoethanolamine	[M-H]-	0.789286733497864	HMDB0005779		Lipids and lipid-like molecules	Glycerophospholipids	Glycerophosphoethanolamines	728.455	987.394	647.776	832.778	924.448	707.835	1413.32	1294.85	145.142	1456.66	1090.65	719.305	804.781	1019.99	0.789011	0.337657	0.0537408
M457T182	457.23476	181.6670	nodiff	1-(5z,8z,11z,14z-eicosatetraenoyl)-sn-glycero-3-phosphate	[M-H]-	0.718568380822061			Lipids and lipid-like molecules	Glycerophospholipids	Glycerophosphates	40068.5	23069.6	21380.6	34061.7	24108	39831.2	48331.1	55344.4	50827.7	47318.2	41827.7	49282.7	30419.9	48822	0.623078	0.000900295	0.894294
M544T237	544.26718	236.5485	nodiff	1-(5z,8z,11z,14z-eicosatetraenoyl)-sn-glycero-3-phosphoserine	[M-H]-	0.7483683756385						8900.2	5063.5	6636.77	2217.29	3197.29	4476.58	6638.14	7223.63	3142.69	2463.99	6021.22	3907.82	5081.94	4899.58	1.03722	0.889152	0.0405469
M476T194_2	476.27777	194.1440	nodiff	1-(9z,12z-octadecadienoyl)-2-hydroxy-sn-glycero-3-phosphoethanolamine	[M]-	0.986775404364127			Lipids and lipid-like molecules	Fatty Acyls	Lineolic acids and derivatives	951997	309857	360119	707026	369714	256403	604501	399922	325880	234263	540257	288645	492519	398911	1.23466	0.478828	0.557228
M519T60	519.14503	59.9120	nodiff	1-[4,5-dihydroxy-6-(hydroxymethyl)-3-[(e)-3-(4-hydroxyphenyl)prop-2-enoyl]oxyoxan-2-yl]oxy-6-hydroxy-7-methylidene-4a,5,6,7a-tetrahydro-1h-cyclopenta[c]pyran-4-carboxylic acid	[M-H]-	0.921035078416802			Phenylpropanoids and polyketides	Cinnamic acids and derivatives	Hydroxycinnamic acids and derivatives	452.142	653.355	333.398	629.312	688.044	434.053	531.397	870.056	782.601	1480.99	6789.21	1183.12	531.717	1939.56	0.274143	0.181784	0.187312
M213T380	213.01602	380.0040	nodiff	1-Deoxy-D-xylulose 5-phosphate	[M-H]-	0.999662600834146	HMDB0001213	C11437	Organic oxygen compounds	Organooxygen compounds	Carbohydrates and carbohydrate conjugates	6549.84	4286.1	6934.82	4778.77	4187.04	4354.76	10244.4	12533.4	8271.13	5780.95	11464.1	8699.56	5181.89	9498.91	0.545524	0.00306917	0.457452
M673T168	673.47973	167.5800	nodiff	1-Hexadecanoyl-2-(9Z-octadecenoyl)-sn-glycero-3-phosphoric acid	[M-H]-	0.953452864592719						40024	23883.7	12141	21944.4	25652.1	31193.4	31667.5	46783.8	64230	30138.2	17221.9	26539.4	25806.4	36096.8	0.714923	0.218774	0.595917
M671T144	671.46524	144.1090	nodiff	1-Hexadecanoyl-2-(9Z,12Z-octadecadienoyl)-sn-glycero-3-phosphoric acid	[M-H]-	0.968139161370649						175188	158615	129963	176165	152259	78439.4	118588	123388	151098	137627	117032	140483	145105	131369	1.10456	0.41194	0.617385
M395T194	395.25524	194.1420	nodiff	1-hexadecyl lysophosphatidic acid	[M-H]-	0.984488016851586	HMDB0062325		Lipids and lipid-like molecules	Glycerophospholipids	Glycerophosphates	1648.2	1323.03	1953.84	1894.77	2408.35	2155.89	2756.07	4102.88	2298.49	1619.01	2566.87	2771.64	1897.35	2685.83	0.70643	0.0573442	0.181881
M471T183	471.22508	183.4395	nodiff	1-o-octyl-2-o-(n-methylcarbamoyl)-sn-glyceryl-3-phosphorylcholine	[M+HCO2]-	0.9538113928007			Lipids and lipid-like molecules	Glycerophospholipids	Glycerophosphocholines	4477.01	6492.17	6149.14	7772.15	23911	4334.07	3743.26	4857.96	7588.15	3170.35	4330.71	4101.31	8855.92	4631.96	1.91192	0.205895	0.281084
M509T158	509.28707	158.3050	nodiff	1-oleoyl-2-hydroxy-sn-glycero-3-phospho-(1'-rac-glycerol)	[M-H]-	0.993791663377911			Lipids and lipid-like molecules	Glycerophospholipids	Glycerophosphoglycerols	56629.2	33604.5	55250.2	52257.5	30115.8	17309.8	50100.5	50446.1	42608.1	24902.3	46023.7	42618.5	40861.2	42783.2	0.955075	0.806452	0.350922
M409T108_1	409.23496	108.3880	nodiff	1-Palmitoyl Lysophosphatidic Acid	(M-H)-	0.9935						14927.9	52326.3	2303.55	15790.7	24890.6	13366.9	20545.3	20702.1	3691.4	4061.52	28224.3	11742.9	20601	14827.9	1.38934	0.491791	0.408194
M794T38	793.50235	38.1780	nodiff	1-palmitoyl-2-docosahexaenoyl-sn-glycero-3-phospho-(1'-rac-glycerol)	[M-H]-	0.884683866078405			Lipids and lipid-like molecules	Glycerophospholipids	Glycerophosphoglycerols	15215.9	14912	30584.2	11052.7	8436.29	5936.95	14261.5	16301.5	4575.81	3428.24	6764	8380.52	14356.3	8951.92	1.60372	0.222658	0.230943
M483T161	483.27141	160.7700	nodiff	1-palmitoyl-2-hydroxy-sn-glycero-3-phospho-(1'-rac-glycerol)	[M-H]-	0.962262543429819			Lipids and lipid-like molecules	Glycerophospholipids	Glycerophosphoglycerols	16303.8	7391.36	13519.8	28481.3	8984.16	9016.77	11684.7	22978.6	13855.6	10542.6	13801	9671.45	13949.5	13755.7	1.0141	0.959944	0.11249
M723T39	722.50582	39.3560	nodiff	1-palmitoyl-2-lauroyl-sn-glycero-3-phosphorylcholine	[M+HCO2]-	0.990465679984138			Lipids and lipid-like molecules	Glycerophospholipids	Glycerophosphocholines	5384.16	10195.7	86336	5586.18	2444.34	4084.44	35478.9	18814.7	9474.16	5298.81	9853.35	17320.5	19005.1	16040.1	1.18486	0.838898	0.159744
M746T39	745.50285	39.0855	nodiff	1-palmitoyl-2-linoleoyl-sn-glycero-3-phospho-(1'-rac-glycerol)	[M-H]-	0.983799417946908			Lipids and lipid-like molecules	Glycerophospholipids	Glycerophosphoglycerols	31182.8	28679	42672.5	28912.7	15591.7	14545.9	37710.4	45262.1	18156.4	6070.68	18537.1	24562.3	26930.8	25049.9	1.07509	0.800385	0.071549
M803T137	802.57472	136.7760	nodiff	1-palmitoyl-2-linoleoyl-sn-glycero-3-phosphocholine	[M+HCO2]-	0.819049788334675	HMDB0007973		Lipids and lipid-like molecules	Glycerophospholipids	Glycerophosphocholines	100035	111837	180566	208904	102859	186174	244194	193702	89259	85785.8	220413	155356	148396	164785	0.900541	0.637567	0.511127
M751T40	750.52963	39.6785	nodiff	1-palmitoyl-2-myristoyl-sn-glycero-3-phosphocholine	[M+HCO2]-	0.887176958097997	HMDB0007965		Lipids and lipid-like molecules	Glycerophospholipids	Glycerophosphocholines	12464.3	9347.94	40812.6	13115.5	11000.6	8575.99	50121.9	44663.4	11790.4	13212	16607.6	29245.6	15886.2	27606.8	0.575444	0.195329	0.529814
M748T76	747.51563	76.3080	nodiff	1-palmitoyl-2-oleoyl-phosphatidylglycerol	[M-H]-	0.956797494736584			Lipids and lipid-like molecules	Glycerophospholipids	Glycerophosphoglycerols	61358.7	63366.7	78787.8	62633.6	60084	70121.6	94037.2	98047.1	4593.33	3428.31	73612	8924.65	66058.7	47107.1	1.40231	0.344149	0.807228
M886T186	885.55347	186.3230	nodiff	1-stearoyl-2-arachidonoyl-sn-glycero-3-phospho-(1'-myo-inositol)	[M-H]-	0.891972054253844	HMDB0009815		Lipids and lipid-like molecules	Glycerophospholipids	Glycerophosphoinositols	2.43558e+07	2.45967e+07	2.78374e+07	2.38712e+07	1.96662e+07	2.85155e+07	2.612e+07	2.70865e+07	3.49313e+06	1.87905e+06	2.32824e+07	1.0022e+07	2.48071e+07	1.53138e+07	1.61992	0.0809368	16.9362
M798T60	797.53486	60.4950	nodiff	1-stearoyl-2-arachidonoyl-sn-glycero-3-phospho-(1'-sn-glycerol)	[M-H]-	0.983472127173623			Lipids and lipid-like molecules	Glycerophospholipids	Glycerophosphoglycerols	4328.78	5194.89	8863.88	3994.97	3807.79	3034.79	3467.27	4514.64	1980.75	2802.82	4266.52	2266.25	4870.85	3216.38	1.51439	0.112134	0.14392
M822T191	821.52053	190.7755	nodiff	1-stearoyl-2-docosahexaenoyl-sn-glycero-3-phospho-(1'-sn-glycerol)	[M-H]-	0.914555503422499			Lipids and lipid-like molecules	Glycerophospholipids	Glycerophosphoglycerols	4128.87	3071.02	4175.79	3743.25	3417.85	4233.88	7125.31	5702.91	1439.98	928.362	6850.26	4216.11	3795.11	4377.16	0.867026	0.612059	0.164272
M437T186_1	437.26473	186.0945	nodiff	1-stearoyl-2-hydroxy-sn-glycero-3-phosphate	[M-H]-	0.996263961978068			Lipids and lipid-like molecules	Glycerophospholipids	Glycerophosphates	42499.6	27348.7	25401.3	58540.4	42769.9	34846.9	17071.8	20977.5	104156	87821.4	18169.9	71733	38567.8	53321.5	0.723307	0.400097	0.992208
M699T144	699.49831	143.6170	nodiff	1-stearoyl-2-linoleoyl-sn-glycero-3-phosphate	[M-H]-	0.935647262125868	HMDB0007861		Lipids and lipid-like molecules	Glycerophospholipids	Glycerophosphates	254425	234461	238676	294040	206533	248830	248321	187195	191055	195588	296967	263024	246161	230358	1.0686	0.489808	0.551839
M774T64	773.53248	64.4170	nodiff	1-stearoyl-2-linoleoyl-sn-glycero-3-phospho-(1'-rac-glycerol)	[M-H]-	0.994675314824188			Lipids and lipid-like molecules	Glycerophospholipids	Glycerophosphoglycerols	20480.6	18550.5	32898.6	21436.7	15386.4	95621.5	16705.8	23513.1	13324.5	12674.5	21967.9	14778	34062.4	17160.6	1.98492	0.212334	0.57107
M787T39	786.50843	39.4110	nodiff	1-stearoyl-2-linoleoyl-sn-glycero-3-phospho-l-serine	[M-H]-	0.969013200448205	HMDB0012380		Lipids and lipid-like molecules	Glycerophospholipids	Glycerophosphoserines	10315.7	9629.31	36014.5	10999.5	9661.55	16349.2	19850.4	26399.9	6927.58	4279.8	12214.2	17722.1	15494.9	14565.7	1.0638	0.867553	0.0278861
M779T140_1	778.57346	139.8100	nodiff	1-stearoyl-2-myristoyl-sn-glycero-3-phosphocholine	[M+HCO2]-	0.865025639911382	HMDB0008031		Lipids and lipid-like molecules	Glycerophospholipids	Glycerophosphocholines	325472	441057	540302	395437	374761	439047	550065	437655	214881	181766	546802	402052	419346	388870	1.07837	0.679103	0.710263
M833T142	832.60524	141.5700	nodiff	1-stearoyl-2-oleoyl-sn-glycero-3-phosphocholine	[M+HCO2]-	0.747660673153108	HMDB0008038		Lipids and lipid-like molecules	Glycerophospholipids	Glycerophosphocholines	26990.7	28122.6	32091.2	12732	26894.7	28720.5	20863.9	15263.7	20902.4	15164.7	20605.3	22022.9	25925.3	19137.2	1.35471	0.0485514	0.297756
M807T141	806.60272	140.6650	nodiff	1-stearoyl-2-palmitoyl-sn-glycero-3-phosphocholine	[M+HCO2]-	0.857824205512289	HMDB0008034		Lipids and lipid-like molecules	Glycerophospholipids	Glycerophosphocholines	52404.4	80173.3	87455.5	72225.5	68829.5	87885.7	86173.1	77388.8	22429	22132.9	83817.9	63933.1	74829	59312.5	1.26161	0.270851	0.603623
M333T109	333.20580	109.2620	nodiff	1,10a-dihydroxy-4,4,7,11b-tetramethyl-1,2,3,4a,5,6,6a,7,11,11a-decahydronaphtho[2,1-f][1]benzofuran-9-one	[M-H]-	0.998059301105705						43889.7	42561.6	6807.89	92562.4	95502.2	24332.9	28200.9	52377.6	27797.6	13497	12184.6	21731.8	50942.8	25964.9	1.96199	0.14676	0.777163
M734T41	734.49689	40.5050	nodiff	1,2-dilinolenoyl-sn-glycero-3-phosphoethanolamine	[M-H]-	0.998236630004275	HMDB0009161		Lipids and lipid-like molecules	Glycerophospholipids	Glycerophosphoethanolamines	17604.4	63974.2	91350	59850	41084.8	45332.7	46425.9	40446.8	13894	19432.8	27941.9	11801.3	53199.3	26657.1	1.99569	0.0467531	0.787127
M770T39	769.50259	38.7680	nodiff	1,2-dilinoleoyl-sn-glycero-3-phospho-(1'-rac-glycerol)	[M-H]-	0.935558929009455			Lipids and lipid-like molecules	Glycerophospholipids	Glycerophosphoglycerols	17074.3	16628.8	27375.6	15967.3	16060.4	9025.44	13553.4	16715.5	5756.3	2906.96	4251.34	8043.75	17022	8537.87	1.9937	0.0272328	0.434907
M381T195	381.20285	194.9565	nodiff	1,2-dimyristoyl-sn-glycero-3-phosphate	[M-H-C14H26O]-	0.990856089192902			Lipids and lipid-like molecules	Glycerophospholipids	Glycerophosphates	1297.43	645.496	1164.23	1368.3	898.792	797.852	1469.75	1658.02	1244.89	994.35	2057.29	1720.71	1028.68	1524.17	0.674915	0.0284578	0.150268
M417T182	417.23921	181.8970	nodiff	1,2-dioleoyl-sn-glycero-3-phosphate	[M-H-C18H34O2]-	0.993938121312303	HMDB0007865		Lipids and lipid-like molecules	Glycerophospholipids	Glycerophosphates	4088.6	5979.21	6119.48	6837.38	5858.86	2919.82	3912.04	5562.16	8338.17	11871.8	6508.74	6180.45	5300.56	7062.23	0.75055	0.197952	0.306557
M510T107	510.25162	107.2900	nodiff	1,2-dioleoyl-sn-glycero-3-phospho-(1'-myo-inositol-3',4'-bisphosphate)	[M-2H]2-	0.9608525551849			Lipids and lipid-like molecules	Glycerophospholipids	Glycerophosphoinositol phosphates	20569	10598.5	9439.32	54295.2	17907.2	69337	11919.5	4440.11	3921.62	4697.36	9453.24	5607.5	30357.7	6673.22	4.54918	0.0454241	0.836729
M550T196	550.24562	195.7030	nodiff	1,2-dioleoyl-sn-glycero-3-phospho-(1'-myo-inositol-3',4',5'-trisphosphate)	[M-2H]2-	0.709633916176815	HMDB0010159		Lipids and lipid-like molecules	Glycerophospholipids	Glycerophosphoinositol phosphates	838.291	1156.64	2763.22	1522.85	1716.35	1501.09	1934.14	1855.73	479.861	1000.06	1903.51	1622	1583.07	1465.88	1.07995	0.752884	0.0264015
M862T190	861.55223	189.5385	nodiff	1,2-dioleoyl-sn-glycero-3-phospho-(1'-myo-inositol)	[M-H]-	0.904577478622125	HMDB0009837		Lipids and lipid-like molecules	Glycerophospholipids	Glycerophosphoinositols	2.50402e+06	1.31863e+06	1.06213e+06	2.45772e+06	1.32259e+06	1.28764e+06	1.50493e+06	1.3258e+06	200908	169396	1.55356e+06	727067	1.65879e+06	913610	1.81564	0.0715165	4.41075
M721T139_2	721.48212	139.2785	nodiff	1,2-dipalmitoyl-sn-glycero-3-phospho-(1'-rac-glycerol)	[M-H]-	0.812238580089718			Lipids and lipid-like molecules	Glycerophospholipids	Glycerophosphoglycerols	81325.4	116231	120201	101683	111922	59882.6	92926.8	66634	90095.5	72488.7	77131	70336.5	98540.8	78268.8	1.25901	0.0840167	0.440157
M691T148	690.50708	148.1440	nodiff	1,2-dipalmitoyl-sn-glycero-3-phosphoethanolamine	[M-H]-	0.873285943167768	HMDB0008923		Lipids and lipid-like molecules	Glycerophospholipids	Glycerophosphoethanolamines	21227.1	16942.8	23174	23373.5	14942.5	18035.5	14469	14588.3	10282.6	8137.27	22151.1	11611.9	19615.9	13540	1.44873	0.0327048	0.343736
M791T140	790.54108	139.8310	nodiff	1,2-distearoyl-sn-glycero-3-phospho-l-serine	[M-H]-	0.91844575646372	HMDB0012378		Lipids and lipid-like molecules	Glycerophospholipids	Glycerophosphoserines	740949	865812	2.10397e+06	1.0824e+06	759971	1.1012e+06	1.03214e+06	1.11811e+06	884761	650273	1.12712e+06	1.13503e+06	1.10905e+06	991240	1.11885	0.608786	1.235
M704T183	703.53908	183.4855	nodiff	1,2-Distearoyl-sn-glycerol 3-phosphate(PA(18:0/18:0))	[M-H]-	0.972370833408394						12472	14227.6	11339.7	13601.5	12373.8	13243.6	23861.6	25702.7	9372.63	8018.72	34433.2	18218.3	12876.4	19934.5	0.645933	0.121082	0.511143
M163T201_2	163.06046	200.5610	nodiff	1,5-anhydro-d-sorbitol	[M-H]-	0.949006158648384	HMDB0002712	C07326	Organic oxygen compounds	Organooxygen compounds	Carbohydrates and carbohydrate conjugates	84916	43968.3	59025.5	70381.5	33233.4	52117	111699	106922	56444	40245.4	81643.7	83110	57273.6	80010.7	0.715824	0.126985	0.856417
M461T26	461.27181	26.4045	nodiff	1.alpha.-methyl-5.alpha.-androstan-3.alpha.-ol-17-one glucuronide	[M-H-H2O]-	0.771076954366667						3518.66	2642.71	4364.63	4674.77	315.635	6303.43	3523.48	3350.85	1861.7	1943.3	3837.23	2619.85	3636.64	2856.07	1.2733	0.405931	0.111632
M513T29	513.30924	29.1705	nodiff	11-ketofusidic acid	[M-H]-	0.977285806626769			Lipids and lipid-like molecules	Steroids and steroid derivatives	Steroid esters	4679.85	7527.38	9060.7	12356.2	4368.87	7016.16	5634.09	13999.5	4174.99	4326.18	11243.6	5897.58	7501.53	7545.99	0.994108	0.983214	0.0537859
M307T166	307.26316	166.2990	nodiff	11(Z),14(Z)-Eicosadienoic Acid	(M-H)-	1						4253.17	2155.6	6606.82	4224.78	4091.08	2923.96	7565.11	4815.64	3080.67	1246.27	8805.6	3580.09	4042.57	4848.9	0.833709	0.554721	0.170724
M327T79	327.28943	79.2280	nodiff	12-hete-[d8]	[M-H]1-	0.981819595975775			Lipids and lipid-like molecules	Fatty Acyls	Eicosanoids	17490.6	5317.53	9213.36	14680.8	8523.46	8012.58	16926.8	31217.2	10627.5	3802.78	16118.1	10570.6	10539.7	14877.2	0.708449	0.3294	0.350651
M323T76	323.18327	76.0185	nodiff	12-Oxo-2,3-dinor-10,15-phytodienoic acid	(M+CH3COO)-	0.7078						10770.2	8278.44	5117.84	8216.25	6221.7	70432.4	2870.75	3951.58	2317.44	2340.61	3680.72	4878.26	18172.8	3339.89	5.44113	0.187734	0.579438
M313T81	313.23755	81.4190	nodiff	12,13-dihydroxy-9z-octadecenoic acid	[M-H]-	0.990214573172879			Lipids and lipid-like molecules	Fatty Acyls	Fatty acids and conjugates	85407.2	25882	39193.6	67711.1	12397.2	44626.7	50254.8	97342.2	34970.3	24648.2	71000.4	44178.5	45869.6	53732.4	0.853668	0.620558	0.362298
M295T40_2	295.22720	39.9420	nodiff	12(13)-epoxy-9z-octadecenoic acid	[M-H]-	0.784832354239859	HMDB0004702		Lipids and lipid-like molecules	Fatty Acyls	Fatty acids and conjugates	117951	106413	79627.1	123339	50647.7	96051.1	93549	124769	108225	53235.2	83573.2	107105	95671.5	95075.9	1.00626	0.969103	0.422282
M319T107	319.22670	106.5500	nodiff	12(R)-HETE	(M-H)-	0.6398						27157.8	16191	6296.23	18981.9	35969.5	14021.3	14715.9	13720.6	5590.15	5566.12	11379.4	7724.3	19769.6	9782.74	2.02087	0.0538335	0.559454
M293T107_3	293.21149	106.9620	nodiff	13-OxoODE	(M-H)-	0.6571						12269.6	6346.06	12243.8	11483.3	9107.48	11122.9	14549.1	23773.9	13856.4	6856.94	15817.9	12785.7	10428.9	14606.6	0.713981	0.115394	0.404703
M323T41	323.25630	41.2305	nodiff	14,15-epoxyeicosa-5(z)-enoic acid	[M-H]-	0.876635332832439			Lipids and lipid-like molecules	Fatty Acyls	Fatty acids and conjugates	30506.8	20882.8	17304.1	31606.8	20000	33365.5	20583.5	13131.8	30888.8	20668.7	15035.1	25530.9	25611	20973.1	1.22113	0.263141	0.369252
M365T187	365.23271	186.5670	nodiff	15-cyclohexylpentanorprostaglandin f2.alpha.	[M-H]-	0.997070517909315			Lipids and lipid-like molecules	Fatty Acyls	Eicosanoids	12511.9	10991.4	6842.4	22594	41833.8	19056.2	7548.71	1735.28	115.188	199.138	183.751	789.525	18971.6	1761.93	10.7675	0.0084155	0.802234
M317T59	317.21148	59.1950	nodiff	15-hydroxy-5z,8z,11z,13e,17z-eicosapentaenoic acid	[M-H]-	0.937298590772221			Lipids and lipid-like molecules	Fatty Acyls	Eicosanoids	188781	39402.3	13521.7	96500.4	187843	91745.9	66058.8	103599	67043.7	50244.9	64538.9	66256.1	102966	69623.6	1.47889	0.303652	0.690303
M317T110	317.23375	109.9960	nodiff	15-oxo-5z,8z,11z,13e-eicosatetraenoic acid	[M-H]-	0.829996776078022	HMDB0010210	C04577	Lipids and lipid-like molecules	Fatty Acyls	Fatty acids and conjugates	2761.69	4356.16	876.69	6281.82	1712.01	1137.04	2479.38	4844.03	4363.9	1236.76	4537.97	1196.83	2854.23	3109.81	0.917816	0.821107	0.0525625
M349T155	349.23782	154.5310	nodiff	15(r)-15-methylprostaglandin f2.alpha.	[M-H-H2O]-	0.990823017228995			Lipids and lipid-like molecules	Fatty Acyls	Eicosanoids	4758.33	5363.55	2628.84	6173.55	10405.3	3459.01	1939.83	2354.26	1705.07	1907.42	1378.19	1795.86	5464.77	1846.77	2.95909	0.00925741	0.335902
M271T107_2	271.22674	106.8450	nodiff	16-Hydroxypalmitic acid	(M-H)-	0.9924	HMDB0006294	C18218	Lipids and lipid-like molecules	Fatty Acyls	Fatty acids and conjugates	16282	10940.7	21814.7	15220.6	14607.7	18900.9	15086.6	18533.2	12501.9	7669.06	12802.4	11473.6	16294.4	13011.1	1.25235	0.153993	0.181836
M355T32	355.19374	31.9540	nodiff	16-phenyltetranorprostaglandin f2.alpha.	[M-H-H2O]-	0.997079798976904			Lipids and lipid-like molecules	Fatty Acyls	Eicosanoids	10128.9	12991.5	7157.04	15130.8	4716.96	16422.7	11074.5	24036.1	2427.39	7396.54	8964.58	11666.3	11091.3	10927.6	1.01499	0.963546	0.0393829
M469T194	469.18700	194.4950	nodiff	17.beta.-Estradiol 3-.beta.-D-glucuronide	(M+Na-2H)-	0.8012						1169.16	1599.86	2253.44	966.604	2049.27	1018.12	1348.31	2151.12	1797.72	648.675	1531.98	2214.76	1509.41	1615.43	0.93437	0.752058	0.0682468
M337T30	337.18404	29.8980	nodiff	18-carboxydinorleukotriene b4	[M-H]-	0.983086282698893			Lipids and lipid-like molecules	Fatty Acyls	Fatty acids and conjugates	17711.8	17442	17717.6	33238.4	7937.96	17662.8	13317.8	27563.6	7805.87	8582.26	51866.4	22617.3	18618.4	21958.9	0.847877	0.667756	0.251219
M469T61	469.32909	61.3990	nodiff	18.alpha.-glycyrrhetinic acid	[M-H]-	0.962978349344377			Lipids and lipid-like molecules	Prenol lipids	Triterpenoids	1747.4	720.418	2931.53	1809.14	965.589	2432.68	6809.73	9984.3	10903.2	5681.71	6840.46	8516.6	1767.79	8122.67	0.217637	3.40358e-05	0.535466
M469T108	469.32824	107.9360	nodiff	18.beta.-glycyrrhetinic acid	[M-H]-	0.864032894863788			Lipids and lipid-like molecules	Prenol lipids	Triterpenoids	4844.06	6083.07	7978.8	12930.3	6348.81	3680.1	13031.1	18093.1	65450.8	20757.7	9477.36	15879.7	6977.51	23781.6	0.2934	0.0789192	0.790763
M83T51	83.02441	51.0730	nodiff	1h-1,2,4-triazol-3-amine	[M-H]-	0.787879937700454		C11261	Organoheterocyclic compounds	Azoles	Triazoles	15091.1	19377.4	15093.7	13077.5	18860	21398.4	3809.76	4813.34	8359.97	10189.6	13319.3	5721.83	17149.7	7702.3	2.22657	0.000731793	0.522193
M801T320	801.31985	320.0390	nodiff	1h-indole-1-pentanoic acid, 3-[(4-methoxy-1-naphthalenyl)carbonyl]-	[2M-H]-	0.96440208250372			Organoheterocyclic compounds	Indoles and derivatives	Naphthoylindoles	689.414	362.556	489.109	402.23	404.846	299.852	2389.89	3288.83	1167.04	792.737	2959.6	2011.85	441.335	2101.66	0.209993	0.00213968	0.263564
M372T38	372.18431	38.1060	nodiff	1h-indole-1-pentanoic acid, 3-[[[1-(aminocarbonyl)-2,2-dimethylpropyl]amino]carbonyl]-	[M-H]-	0.976016854284587			Organic acids and derivatives	Carboxylic acids and derivatives	Amino acids, peptides, and analogues	12728.9	17520.1	18136.4	12602.2	9100.41	8908.79	3050.51	3831.49	1940.55	2994.17	2097.47	2164.96	13166.1	2679.86	4.913	8.23819e-05	0.603007
M188T107	188.07077	107.3510	nodiff	1h-indole-3-propanoic acid	[M-H]-	0.898517274938688	HMDB0002302		Organoheterocyclic compounds	Indoles and derivatives	Indolyl carboxylic acids and derivatives	103594	58849.2	19730.8	63034.9	36814.5	9335.56	37019.2	32615.9	5075.44	3387.37	33579.9	23298.3	48559.9	22496	2.1586	0.11777	0.694999
M829T163	828.53887	162.6160	nodiff	2-((octadec-9-enoyl-16,16,17,17,18,18,18-d7)oxy)-3-(pentadecanoyloxy)propyl (2,3,4,5,6-pentahydroxycyclohexyl) phosphate	[M-H]-	0.878243131607152			Lipids and lipid-like molecules	Glycerophospholipids	Glycerophosphoinositols	69564.1	53963.5	33192.8	60980.1	43388.1	21734.9	41191.4	39004.4	16767.9	20113.8	48828.5	29339.5	47137.2	32540.9	1.44855	0.133049	0.480857
M337T41_1	337.23589	41.1800	nodiff	2-(2-hydroxybut-3-en-2-yl)-3a,6,6,9a-tetramethyl-2,4,5,5a,7,8,9,9b-octahydro-1h-benzo[e][1]benzofuran-4,5-diol	[M-H]-	0.744500206004194						33285.3	29476.2	22508.7	28147.9	29791.1	61103	26882.7	18637.5	43650.9	35413.1	11047.9	11318.8	34052	24491.8	1.39034	0.247793	0.488538
M298T337	298.07840	337.3690	nodiff	2-(6-amino-8-sulfanylpurin-9-yl)-5-(hydroxymethyl)oxolane-3,4-diol	[M-H]-	0.729726927075365						3556.97	2713.3	6163.95	1230.17	3021.91	1264.77	1248.75	2408.05	2217.65	1095.72	2752.24	1924.51	2991.84	1941.15	1.54127	0.212721	0.0761512
M206T295	206.08148	294.8760	nodiff	2-(cyclohexylamino)ethanesulfonic acid	[M-H]-	0.899457438769058			Organic nitrogen compounds	Organonitrogen compounds	Cyclohexylamines	13119.1	14407.8	26503.8	17240	3408.66	16266.8	20010.2	15440.4	8793.62	3969.97	22338.1	16296.6	15157.7	14474.8	1.04718	0.872544	0.0236075
M194T89	194.04864	88.7780	nodiff	2-(n-morpholino)ethanesulfonic acid	[M-H]-	0.981276519986613			Organoheterocyclic compounds	Oxazinanes	Morpholines	23119	40872	22179.3	40290.8	66155.5	30929.9	29660.7	54375.6	47901.1	20817	42669	49475.1	37257.8	40816.4	0.912813	0.6839	0.377506
M417T242	417.15615	241.7680	nodiff	2-acetyl-6-[(3-butanoyl-2,4,6-trihydroxy-5-methylphenyl)methyl]-3,5-dihydroxy-4,4-dimethylcyclohexa-2,5-dien-1-one	[M-H]-	0.757528405557127			Organic oxygen compounds	Organooxygen compounds	Carbonyl compounds	502.073	280.047	292.013	387.731	305.272	115.681	832.718	717.743	441.972	587.982	5090.47	654.919	313.803	1387.63	0.226142	0.179683	0.168628
M522T238	522.28279	238.1410	nodiff	2-amino-3-[hydroxy-[2-hydroxy-3-[octadec-9-enoyl]oxypropoxy]phosphoryl]oxypropanoic acid	[M-H]-	0.962958307534369			Lipids and lipid-like molecules	Glycerophospholipids	Glycerophosphoserines	2798.61	2547.98	2726.92	1303.05	1815.87	1885.64	1936.91	2236.91	831.437	1296.47	1797.86	1175.16	2179.68	1545.79	1.41007	0.0813485	0.0951065
M767T64	766.53988	64.1420	nodiff	2-arachidonoyl-1-stearoyl-sn-glycero-3-phosphoethanolamine	[M-H]-	0.806833441968295	HMDB0009003		Lipids and lipid-like molecules	Glycerophospholipids	Glycerophosphoethanolamines	109932	72490.4	700622	102222	154080	230724	75951.7	157386	5563.19	5295.94	29300	8687.63	228345	47030.8	4.85522	0.100404	1.78298
M245T91	245.02883	91.2295	nodiff	2-chloro-2'-hydroxy-4'-methylbenzophenone	[M-H]-	0.972860722589161			Benzenoids	Benzene and substituted derivatives	Benzophenones	7351.04	6703.15	6778.67	3964.14	11715.2	14495.1	3840.5	4507.61	6388.89	8860.47	4731.99	4932.83	8501.22	5543.71	1.53349	0.12049	0.211361
M245T106	245.11789	105.6980	nodiff	2-cis-4-trans-abscisic acid	[M-H-H2O]-	0.784456165967899		C06082	Lipids and lipid-like molecules	Prenol lipids	Sesquiterpenoids	13408	4299.37	6458.11	6848.48	7841.62	6381.31	10552.4	17687.6	6710.13	21807.3	14379.2	8691.89	7539.48	13304.8	0.566676	0.0557711	0.415083
M791T590	790.53758	589.9350	nodiff	2-docosahexaenoyl-1-stearoyl-sn-glycero-3-phosphoethanolamine	[M-H]-	0.819144537359528	HMDB0009012		Lipids and lipid-like molecules	Glycerophospholipids	Glycerophosphoethanolamines	482.654	514.179	1069.53	339.219	600.39	458.936	642.156	667.832	600.091	755.704	239.638	490.057	577.485	565.913	1.02045	0.929786	0.059303
M117T171	117.05494	170.6150	nodiff	2-hydroxy-3-methylbutyric acid	[M-H]-	0.939922038399416	HMDB0000407		Lipids and lipid-like molecules	Fatty Acyls	Fatty acids and conjugates	57293.4	14376.2	25812	93104.7	41816.2	75215.5	32921.2	42771.9	12345	7537.21	22411.2	23355	51269.7	23556.9	2.17642	0.0636426	0.849192
M150T256	150.04165	256.2935	nodiff	2-hydroxyadenine	[M-H]-	0.919808411371597	HMDB0000403		Organoheterocyclic compounds	Imidazopyrimidines	Purines and purine derivatives	43752.5	2032.07	2096.62	45941.3	44405.1	44786.1	45861.3	46400.8	44013.2	46302.7	46310.9	45381.7	30502.3	45711.8	0.667274	0.122116	0.619005
M175T215	175.02384	215.2625	nodiff	2-keto-D-Gluconic acid	(M-H2O-H)-	0.9325		C06473				8510.41	16870.4	5806.99	5690.41	52118.6	6703.7	32934.3	3942.21	44124.4	47776	4248.48	39334.1	15950.1	28726.6	0.555238	0.270646	0.584474
M193T293	193.03474	293.4835	nodiff	2-keto-l-gulonic acid	[M-H]-	0.807641335970475		C15673	Organic oxygen compounds	Organooxygen compounds	Carbohydrates and carbohydrate conjugates	13564.2	16127.1	25192.5	22629.2	10860.2	16158.3	24839.2	26529.1	16910.8	16689.8	29799.1	12861.7	17421.9	21271.6	0.819021	0.300248	0.350075
M129T303	129.06638	303.4150	nodiff	2-ketohexanoic acid	[M-H]-	0.707106781186548	HMDB0001864	C00902	Organic acids and derivatives	Keto acids and derivatives	Medium-chain keto acids and derivatives	3380.02	5207.69	5693.08	4068.01	5869.7	2987.23	4785.98	5249.82	1692.65	1663.88	2933.34	4847.11	4534.29	3528.8	1.28494	0.257207	0.131471
M715T146	714.50901	145.9055	nodiff	2-linoleoyl-1-palmitoyl-sn-glycero-3-phosphoethanolamine	[M-H]-	0.990646670637223	HMDB0008928		Lipids and lipid-like molecules	Glycerophospholipids	Glycerophosphoethanolamines	611667	367002	588766	697653	436558	297041	378741	332691	181929	238012	582932	324668	499781	339829	1.47068	0.0903848	1.48001
M117T147	117.05522	146.6860	nodiff	2-methyl-3-hydroxybutyric acid	[M-H]-	0.914873755946783	HMDB0000354		Lipids and lipid-like molecules	Fatty Acyls	Fatty acids and conjugates	31334	6027.06	10770.5	25277.1	26609.6	25883.9	14009.3	23369.8	675.201	367.279	8960.57	2661.66	20983.7	8340.63	2.51584	0.0457603	0.634451
M296T196	296.09949	195.6960	nodiff	2-methylguanosine	[M-H]-	0.745143608407675	HMDB0005862		Nucleosides, nucleotides, and analogues	Purine nucleosides		3846.4	3204.56	5079.76	3231.96	6893.08	3284.35	2544.99	3277.46	1300.41	1044.46	3737.84	2136.34	4256.69	2340.25	1.8189	0.0274954	0.240017
M207T36	206.99627	35.6870	nodiff	2-naphthalenesulfonic acid	[M-H]-	0.938012596056046		C06165	Benzenoids	Naphthalenes	Naphthalene sulfonic acids and derivatives	35441.3	31337.2	30163.5	27447.9	49167.4	32069.2	29918	35470.1	25038.1	18782.9	122315	32198.4	34271.1	43953.8	0.779706	0.5625	0.584546
M759T129	758.56681	129.2265	nodiff	2-Oleoyl-1-palmitoyl-sn-glycero-3-phosphocholine(PC(16:0/18:1(9Z)))	(M-H)-	0.8626						55822.6	50582.3	64703.2	50069.9	41125.2	39417.6	52339.3	55658.5	3830.42	1826.02	54437.6	13044.4	50286.8	30189.4	1.66571	0.110861	0.744924
M760T142	760.49313	142.0585	nodiff	2-oleoyl-1-palmitoyl-sn-glycero-3-phosphoserine	[M-H]-	0.882498135974979	HMDB0012357		Lipids and lipid-like molecules	Glycerophospholipids	Glycerophosphoserines	24765	29160.9	46026.5	28143.7	21456.5	23798.9	22739.7	30627.1	21172	22756.8	41097.6	26269.3	28891.9	27443.8	1.05277	0.766208	0.204584
M789T140_1	788.52466	139.8100	nodiff	2-oleoyl-1-stearoyl-sn-glycero-3-phosphoserine	[M-H]-	0.917243420191442	HMDB0010163		Lipids and lipid-like molecules	Glycerophospholipids	Glycerophosphoserines	123748	146860	504205	171527	101045	190166	265629	238446	168170	178919	321223	300489	206259	245479	0.840227	0.5664	1.18939
M159T277_2	159.01420	277.1440	nodiff	2-oxoadipic acid	[M-H]-	0.967102421634102	HMDB0000225	C00322	Organic acids and derivatives	Keto acids and derivatives	Medium-chain keto acids and derivatives	74839.4	70472	53344.8	76272.9	68142.2	47306.5	72797.5	42882.8	53303	36351.2	69424.1	48229.4	65063	53831.3	1.20865	0.17466	0.273187
M339T33	339.23291	33.2260	nodiff	2,2'-methylene-bis(6-tert-butyl-4 methylphenol)	[M-H]-	0.998205726470344			Benzenoids	Benzene and substituted derivatives	Diphenylmethanes	197179	200823	319208	625002	437822	583493	644564	1.92902e+06	173768	308952	1.72387e+06	856784	393921	939493	0.419291	0.10687	4.1481
M220T621	220.14629	620.8770	nodiff	2,6-di-tert-butyl-4-methoxyphenol	[M-H-CH3]-	0.98131780029526			Benzenoids	Phenols	Methoxyphenols	1.90535e+06	1.48322e+06	2.03874e+06	2.32129e+06	1.10231e+06	1.85969e+06	1.19303e+06	1.82638e+06	1.63873e+06	268315	1.79136e+06	1.79491e+06	1.7851e+06	1.41879e+06	1.25819	0.258034	1.47117
M205T34	205.15968	33.8330	nodiff	2,6-di-tert-butylphenol	[M-H]-	0.999442370142096			Benzenoids	Benzene and substituted derivatives	Phenylpropanes	103625	92279.5	100799	97738.6	92079.1	86988.3	122246	144429	86945	60285.4	104544	94288.7	95584.9	102123	0.935978	0.602573	0.61944
M281T181	281.09282	180.8755	nodiff	2'-O-methylinosine	(M-H)-	0.7966						11324.3	9436.52	2137	4634.75	45486.2	14764.2	6580.05	10413.5	3996.43	3547.71	9837.48	4105.44	14630.5	6413.43	2.28123	0.239211	0.519243
M307T288_2	307.04603	288.0150	nodiff	2''-galloylhyperin	[M-2H]2-	0.711108274446348			Phenylpropanoids and polyketides	Flavonoids	Flavonoid glycosides	2665.33	2235.53	3000.81	1952.64	5714.83	1934.34	4946.54	6970.18	4470.61	23636.9	7268.14	4055.8	2917.25	8558.02	0.340879	0.100639	0.407094
M309T107_2	309.27853	107.2080	nodiff	2E-Eicosenoic acid	(M-H)-	1						6858.08	4453.51	2771.01	6941.48	2669.79	4993.64	5497.56	5942.66	3928.5	3373.59	5046.92	2490.86	4781.25	4380.01	1.09161	0.678788	0.0389688
M182T379	182.02171	378.5760	nodiff	2s-amino-4-phosphonobutyric acid	[M-H]-	0.707186276009292			Organic acids and derivatives	Carboxylic acids and derivatives	Amino acids, peptides, and analogues	5406.59	3077.21	7923.75	5100.67	5273.39	2129.09	9919.94	8179.74	6523.87	2854.92	4782.57	5057.78	4818.45	6219.8	0.774695	0.316127	0.206551
M247T73	247.06343	73.2240	nodiff	3-(4-hydroxy-5-oxo-3-phenyl-2h-furan-2-yl)propanoic acid	[M-H]-	0.713211182223963			Organoheterocyclic compounds	Dihydrofurans	Furanones	7110.3	914.951	4855.51	5678.03	1151.52	4344.5	9470.83	16269.9	7390.07	6945.86	11020.7	7075.59	4009.13	9695.49	0.413505	0.00976809	0.472672
M255T71	255.06671	71.1720	nodiff	3-(5-phenylthiophen-2-yl)prop-2-ynyl acetate	[M-H]-	0.922852704578904			Organoheterocyclic compounds	Thiophenes	2,5-disubstituted thiophenes	3195	4965.46	1421.74	5051.47	8515.27	2523.02	3182.15	3469.87	2816.21	2376.69	4496.15	4488.82	4278.66	3471.65	1.23246	0.473607	0.135972
M236T31	236.09619	30.7185	nodiff	3-(cyclohexylamino)-2-hydroxy-1-propanesulfonic acid	[M-H]-	0.99374293270708			Organic nitrogen compounds	Organonitrogen compounds	Cyclohexylamines	21943	14616.7	8603.13	12204.8	23895.1	7791.55	14768.5	14533.6	6180.12	6301.86	21352.2	7970.19	14842.4	11851.1	1.25241	0.438349	0.321312
M152T344	152.04298	344.1610	nodiff	3-Guanidinopropanoate	(M+Na-2H)-	0.6387						32764.5	27207	29066	30820.7	44824.8	34512.9	15792.6	17713.4	17647.2	9850.67	23751.2	15629.9	33199.3	16730.8	1.98432	0.000378375	0.739505
M121T198	121.02902	198.0410	nodiff	3-hydroxybenzaldehyde	[M-H]-	0.713451037183355		C03067	Organic oxygen compounds	Organooxygen compounds	Carbonyl compounds	40819.6	39863.2	31811.7	47248.3	63139.7	42426.6	26119	13593.3	28066.6	27436	29165.2	28019.1	44218.2	25399.9	1.74088	0.00335937	0.673049
M187T108_2	187.13325	107.6745	nodiff	3-hydroxycapric acid	[M-H]-	0.995884279717765	HMDB0002203		Organic acids and derivatives	Hydroxy acids and derivatives	Medium-chain hydroxy acids and derivatives	240517	96783.6	78653.8	158391	46211.3	110578	119090	294516	104334	59489.7	162868	140546	121856	146807	0.830039	0.576601	0.66775
M215T94	215.16451	94.0400	nodiff	3-Hydroxydodecanoic acid	(M-H)-	0.9691	HMDB0000387		Organic acids and derivatives	Hydroxy acids and derivatives	Medium-chain hydroxy acids and derivatives	155635	108949	71124.3	134397	22913	251721	130856	218289	124303	63954.3	195656	146902	124123	146660	0.846333	0.576765	0.483101
M335T25	335.05877	25.3820	nodiff	3-hydroxymandelic acid	[2M-H]-	0.728977000541045	HMDB0000750		Benzenoids	Phenols	1-hydroxy-4-unsubstituted benzenoids	4573.41	2638.88	2113.89	837.414	680.846	1161.52	8505.93	9117.52	6681.45	9609.68	21624.4	8340.8	2000.99	10646.6	0.187946	0.00385181	0.577855
M243T81	243.19566	80.7270	nodiff	3-hydroxymyristic acid	[M-H]-	0.99668461972402	HMDB0061656		Lipids and lipid-like molecules	Fatty Acyls	Fatty acids and conjugates	216179	98651.1	102833	165031	35500.8	42898.3	144122	270301	195933	66490.8	205605	166640	110182	174849	0.630158	0.136255	1.47947
M299T60	299.25828	59.7820	nodiff	3-hydroxyoctadecanoic acid	[M-H]-	0.997839040152539			Lipids and lipid-like molecules	Fatty Acyls	Fatty acids and conjugates	301611	71315	163968	112507	19937.2	44939.6	138893	102893	118288	78655.3	156473	88760.8	119046	113994	1.04432	0.910357	0.547566
M159T128	159.10187	128.0670	nodiff	3-hydroxyoctanoic acid	[M-H]-	0.910937609700907	HMDB0001954	C20793	Organic acids and derivatives	Hydroxy acids and derivatives	Medium-chain hydroxy acids and derivatives	27787.6	28358.5	22043.5	35007.8	9398.52	32139.7	44609.1	38325.6	24031.4	15877.5	34069.8	45672.9	25789.3	33764.4	0.763801	0.219818	0.421467
M519T219	519.29141	219.3480	nodiff	3-hydroxystanozolol glucuronide	[M-H]-	0.983913359580889			Lipids and lipid-like molecules	Steroids and steroid derivatives	Steroidal glycosides	208.086	436.602	2569.84	7572.28	530.904	1587.39	151.541	324.967	207.383	408.499	273.437	113.219	2150.85	246.508	8.72529	0.127051	0.20302
M471T131	471.31066	131.2070	nodiff	3-ketofusidic acid	[M-H-C2H2O]-	0.977971889959026			Lipids and lipid-like molecules	Steroids and steroid derivatives	Steroid esters	4627.64	1363.98	13465.2	11219.3	2201.86	2740.84	3911.71	8215.18	11885.4	1363.24	5967.74	5975.3	5936.47	6219.77	0.954452	0.914046	0.163059
M263T43	263.02239	43.2635	nodiff	3-methoxy-4-hydroxyphenylglycol sulfate	[M-H]-	0.997605512828293	HMDB0003332		Benzenoids	Phenols	Methoxyphenols	194075	302352	107609	253344	1.55618e+06	225976	54165.2	66654.6	51948.4	34346.1	50027	32694	439922	48305.9	9.10701	0.112233	3.42211
M393T198	393.26383	198.1560	nodiff	3-methoxylimaprost	[M-H-H2O]-	0.99764579717916			Lipids and lipid-like molecules	Fatty Acyls	Eicosanoids	5184.92	16053.7	17214.3	20620.4	3692.88	11424.4	1786.63	1610.09	1217.53	1003.16	964.282	990.547	12365.1	1262.04	9.7977	0.0026035	0.616368
M115T228	115.02006	228.3340	nodiff	3-methyl-2-oxobutyric acid	[M-H]-	0.705978118406131	HMDB0000019	C00141	Organic acids and derivatives	Keto acids and derivatives	Short-chain keto acids and derivatives	88839.4	114923	90920.5	106216	109989	139754	156036	168773	92544.7	42776.6	96512.8	129765	108440	114401	0.947894	0.77688	0.45114
M405T194	405.26312	193.5910	nodiff	3-oxocholic acid	[M-H]-	0.997135276882125	HMDB0000502		Lipids and lipid-like molecules	Steroids and steroid derivatives	Bile acids, alcohols and derivatives	1038.02	9453.42	78593.4	124198	1889.01	31279.3	1173.72	3294.11	1105.74	1021.12	861.243	1241.56	41075.3	1449.58	28.3359	0.0814923	0.967139
M161T321	160.94865	321.1365	nodiff	3,4-dichlorophenol	[M-H]-	0.963374024004925		C14462	Benzenoids	Benzene and substituted derivatives	Halobenzenes	23434.9	28193.4	28384.9	21091.7	28832.9	23324.1	30445.2	34111.3	16209	8956.83	30881	22757.5	25543.7	23893.5	1.06906	0.704088	0.314112
M497T59	497.16432	58.9690	nodiff	3,4-dihydroxy-5-[(2s,3r,4s,5s,6r)-3,4,5-trihydroxy-6-[[4-(2-hydroxypropan-2-yl)cyclohexene-1-carbonyl]oxymethyl]oxan-2-yl]oxybenzoic acid	[M-H]-	0.933703840978859			Phenylpropanoids and polyketides	Tannins	Hydrolyzable tannins	1023.23	2905.04	4464.57	1029.5	2267.62	2850.86	1428.72	2530.49	726.4	1514.53	12193.6	2091.75	2423.47	3414.25	0.70981	0.604346	0.147244
M181T354	181.00867	353.9440	nodiff	3,4-dihydroxyhydrocinnamic acid	[M-H]-	0.774696645048761	HMDB0000423	C10447	Phenylpropanoids and polyketides	Phenylpropanoic acids		690452	661171	649322	693250	691184	673243	669925	696622	294281	197960	629581	507592	676437	499327	1.3547	0.065277	2.31038
M321T78	321.16734	77.6870	nodiff	3.beta.-hydroxymevastatin	[M-H-C5H10O2]-	0.949156626461606			Organic acids and derivatives	Hydroxy acids and derivatives	Medium-chain hydroxy acids and derivatives	9053.26	3993.99	6545.59	6094.11	7949.42	18833	8289.42	11693.3	10255.5	2768.57	9220.75	10321.4	8744.89	8758.15	0.998486	0.995861	0.0303608
M431T61	431.31578	61.3990	nodiff	3.beta.,7.alpha.-dihydroxy-5-cholestenoic acid	[M-H]-	0.96893357447454		C17335	Lipids and lipid-like molecules	Steroids and steroid derivatives	Bile acids, alcohols and derivatives	3329.04	2673.14	4147.04	4874.01	3188.06	4558.36	5477.72	6647.91	6152.09	3654.11	18388.7	6354.27	3794.94	7779.13	0.487836	0.0995736	0.355242
M290T337	290.08694	336.5470	nodiff	3'-.alpha.-sialyl-n-acetyllactosamine	[M-H-C14H25O11N]-	0.93113078611604			Organic oxygen compounds	Organooxygen compounds	Carbohydrates and carbohydrate conjugates	1980.27	1988.98	1429.77	1756.3	4542.5	951.371	1231.1	1622.71	942.964	1829.5	1540.67	795.075	2108.2	1327	1.58869	0.177603	0.105259
M423T267	423.27289	267.1760	nodiff	3'-hydroxyrepaglinide	[M-H-CO2]-	0.955277674816694	HMDB0060979		Organoheterocyclic compounds	Piperidines	Phenylpiperidines	38.1913	2377.35	1239.82	11174.8	749.195	3294.24	22.2513	27.1558	66.778	64.1282	434.268	204.47	3145.59	136.509	23.0432	0.102766	0.273889
M281T154	281.08863	154.2470	nodiff	3'-O-Methylinosine	(M-H)-	0.7307						23289.2	10168.8	15527.7	13317.9	22842.7	9295.02	9648.63	11617.3	10594.4	8482.29	8800.49	8727.11	15740.2	9645.03	1.63195	0.0373664	0.29622
M267T23	267.08115	22.7740	nodiff	4-(2-hydroxyethyl)piperazine-1-(2-hydroxypropanesulfonic acid)	[M-H]-	0.797579115996753			Organoheterocyclic compounds	Diazinanes	Piperazines	1696.26	5279.62	2806.59	2620.38	742.891	966.419	4022.33	1884.43	1656.22	720.455	2966.33	1710	2352.03	2159.96	1.08892	0.821005	0.0178698
M237T298	237.09027	298.0455	nodiff	4-(2-hydroxyethyl)piperazine-1-ethanesulfonic acid	[M-H]-	0.995744485762165	HMDB0062295		Organoheterocyclic compounds	Diazinanes	Piperazines	827.343	2226.21	1921.84	1583.89	1369.85	4022	269117	5299.65	1175.86	710.219	2882.23	693.589	1991.86	46646.4	0.0427012	0.339319	0.72282
M144T189	144.04471	188.6550	nodiff	4-hydroxyquinoline	[M-H]-	0.980806804645684		C06343	Organoheterocyclic compounds	Quinolines and derivatives	Quinolones and derivatives	52517.3	33335.8	40483.8	35566.1	32328.7	48581.9	59377	68531.7	43749.6	28711.1	67060	54920.2	40468.9	53724.9	0.753262	0.0910348	0.742402
M386T37	386.23570	36.9220	nodiff	4-hydroxytamoxifen	[M-H]-	0.985640609753093	HMDB0060530	C05011				97567.5	64075.6	78058.9	122948	56537.8	52524	63055.3	79459	41831.1	19454.4	43017.1	42262.6	78618.7	48179.9	1.63177	0.0539472	0.779117
M151T37	151.03948	36.9020	nodiff	4-methoxybenzoic acid	[M-H]-	0.990362848431846	HMDB0001101	C02519	Benzenoids	Benzene and substituted derivatives	Benzoic acids and derivatives	21543.8	35132.2	12277.4	34594.3	113701	10276.2	48741.8	62590.9	61866.7	5616.92	31846.7	47766.4	37920.9	43071.6	0.880415	0.781137	0.610661
M208T75	208.06441	75.4790	nodiff	4-morpholinopropanesulfonic acid	[M-H]-	0.981708893223234			Organoheterocyclic compounds	Oxazinanes	Morpholines	39677.7	40428.5	27171.1	50485	224647	27136.4	14994.7	20965.6	16462.1	8980.61	42363.8	15399.5	68257.6	19861.1	3.43676	0.15955	1.19482
M251T333	251.07575	332.9855	nodiff	4'-methoxyflavone	[M-H]-	0.735997313387272			Phenylpropanoids and polyketides	Flavonoids	O-methylated flavonoids	3715.1	5888.57	4173.06	2206.7	1481.91	3038.82	4198.37	4048.57	2228.66	2027.56	4280.52	4289.76	3417.36	3512.24	0.972986	0.904746	0.0535752
M381T27	381.23085	26.9840	nodiff	5-heptenoic acid, 7-[(1r,2r,3s,5s)-2-[(1e,3s)-3-(2,3-dihydro-1h-inden-2-yl)-3-hydroxy-1-propen-1-yl]-3-fluoro-5-hydroxycyclopentyl]-, (5z)-	[M-H-HF]-	0.98319342591384			Lipids and lipid-like molecules	Fatty Acyls	Fatty acids and conjugates	10978.3	14450.1	15080.8	15974.3	14284.4	14671.7	16046.8	29899	8792.63	10565.8	24715.1	14207.1	14239.9	17371.1	0.819749	0.385489	0.325046
M267T74	267.19581	73.9350	nodiff	5-heptenoic acid, 7-[(1s,2r,3r,4r)-3-[[2-[(phenylamino)carbonyl]hydrazinyl]methyl]-7-oxabicyclo[2.2.1]hept-2-yl]-, (5z)-	[M-H-C7H5NO]-	0.952832028527725			Benzenoids	Benzene and substituted derivatives	N-phenylureas	137983	41098.4	39418.6	121438	18846.9	92162.8	71574.7	127804	24830	30185.2	102010	35112.2	75157.9	65252.8	1.1518	0.716337	0.260225
M413T234	413.21684	234.2610	nodiff	5.alpha.-pregnan-3.alpha.,17-diol-20-one 3-sulfate	[M-H]-	0.966122841250677			Lipids and lipid-like molecules	Steroids and steroid derivatives	Sulfated steroids	15378.9	6809.9	2562.33	8624.64	25516.6	5763.45	8275.19	25010.7	5888.59	4855.76	3779.61	5056.39	10776	8811.04	1.22301	0.688034	0.283862
M365T251	365.19581	250.5560	nodiff	5s,12r-dihydroxy-6z,8e,10e,14z-eicosatetraene-1,20-dioic acid	[M-H]-	0.946338332944615			Lipids and lipid-like molecules	Fatty Acyls	Fatty acids and conjugates	1257.27	2928.13	1205.74	4894.11	13865.2	2666.43	195.647	282.45	179.818	43.1312	136.63	49.5194	4469.47	147.866	30.2265	0.0518817	0.373486
M212T252	212.02247	252.0460	nodiff	6-(trifluoromethyl)quinolin-4-ol	[M-H]-	0.924270835750132			Organoheterocyclic compounds	Quinolines and derivatives	Quinolones and derivatives	4529.08	4882.33	4207.71	3014.23	8456.95	2555.05	5801.26	6172.3	3166.63	1551.4	8769.78	3320.31	4607.56	4796.95	0.960519	0.892376	0.22494
M151T36	151.00587	36.3070	nodiff	6-mercaptopurine	[M-H]-	0.910946836852788	HMDB0015167	C02380	Organoheterocyclic compounds	Imidazopyrimidines	Purines and purine derivatives	45281.6	32945.3	34795.7	37040.8	31805.5	36938.7	43403.5	56430.1	54076.8	44557.8	19786.8	40050.9	36467.9	43051	0.847087	0.273502	0.617582
M251T256	251.07842	256.0970	nodiff	6-methoxyflavone	[M-H]-	0.799927816238245			Phenylpropanoids and polyketides	Flavonoids	O-methylated flavonoids	1039.21	2372.33	2517.67	2561.14	2600.96	2545.24	1929.31	2257.59	688.535	1520.37	2296.42	2402.29	2272.76	1849.08	1.22913	0.272382	0.0683797
M441T29	441.25188	28.8330	nodiff	6,8-dihydroxy-2,2,4,4-tetramethyl-7-(3-methylbutanoyl)-9-(2-methylpropyl)-9h-xanthene-1,3-dione	[M-H]-	0.793146049570699			Organoheterocyclic compounds	Benzopyrans	1-benzopyrans	8236.07	9213.56	9002.86	14179.1	5942.92	20621.5	12403.3	29717.5	5998.77	6619.51	17767.5	9420.15	11199.3	13654.4	0.820197	0.577464	0.179475
M632T419	632.20607	419.1285	nodiff	6'-sialyllactose	[M-H]-	0.980275384551528			Organic oxygen compounds	Organooxygen compounds	Carbohydrates and carbohydrate conjugates	803.049	1394.53	366.538	1464.5	2882.36	809.983	89.8685	90.512	23.112	113.033	210.036	139.921	1286.83	111.08	11.5846	0.00866073	0.203794
M617T175	617.27350	174.7325	nodiff	7-ethyl-10-(4-n-aminopentanoic acid)-1-piperidino)carbonyloxycamptothecin	[M-H]-	0.794625785382326	HMDB0060661					296973	239735	207571	351705	230605	267471	407607	463915	238458	155714	377982	265908	265677	318264	0.834769	0.338088	1.31813
M335T41	335.29432	40.6230	nodiff	7,7-dimethyl-(5z,8z)-eicosadienoic acid	[M-H]-	0.987915977520548			Lipids and lipid-like molecules	Fatty Acyls	Fatty acids and conjugates	32153.4	16896.8	26212.1	31509.7	14459.8	25899.5	13131.5	19214.3	12140.1	13940.5	15755.7	18000.3	24521.9	15363.7	1.59609	0.0173549	0.472748
M429T79	429.30004	78.7460	nodiff	7.alpha.-hydroxy-3-oxo-4-cholestenoic acid	[M-H]-	0.985536502609118			Lipids and lipid-like molecules	Steroids and steroid derivatives	Bile acids, alcohols and derivatives	14303.4	3604.34	11732	19775.1	2839.06	4596.3	18906	22123.7	28870.9	19155.7	33241.2	29605.8	9475.03	25317.2	0.374252	0.00173109	0.845223
M277T217	277.11059	217.0490	nodiff	8-(2,3-dihydroxy-3-methylbutyl)-7-methoxychromen-2-one	[M-H]-	0.700962150978089						3663.78	2525.58	4716.2	4588.2	3398.85	3512.13	2583.6	2163.56	2581.5	862.453	2328.59	2311.63	3734.12	2138.56	1.7461	0.00373978	0.199185
M307T41	307.26374	41.2110	nodiff	8z,14z-eicosadienoic acid	[M-H]-	0.998150400800475			Lipids and lipid-like molecules	Fatty Acyls	Fatty acids and conjugates	279389	440122	422614	243788	178052	222798	222695	409437	290993	295433	383732	365329	297794	327937	0.908083	0.580836	1.42972
M377T165	377.26852	164.9410	nodiff	9-deoxy-9-methylene-16,16-dimethylprostaglandin e2	[M-H]-	0.915559729868721			Lipids and lipid-like molecules	Fatty Acyls	Fatty acids and conjugates	16135.1	16420.8	23339.1	26492.3	23540.8	17131.1	11544.7	27424.9	15906.9	10894.6	18172.5	21711.1	20509.8	17609.1	1.16473	0.379441	0.0766666
M313T107_4	313.23796	107.2300	nodiff	9,10-dihome	[M-H]-	0.91551153654917			Lipids and lipid-like molecules	Fatty Acyls	Fatty acids and conjugates	39241.7	25068.1	14798.6	32487.8	40889.3	22256.1	15630.4	25576.4	15710.5	13476	19811.5	12975.7	29123.6	17196.7	1.69355	0.0267757	0.535585
M295T61	295.22712	60.8215	nodiff	9(S)-HODE	(M-H)-	0.6954						240595	76024.3	83393.8	198448	38895.9	80273.6	130102	195301	125111	118510	213696	174222	119605	159490	0.74992	0.301961	1.10314
M290T39	290.14206	38.9955	nodiff	9h-xanthene-9-propanoic acid, .alpha.-amino-.alpha.-[(1s,2s)-2-carboxycyclopropyl]-, (.alpha.s)-	[M-H-CH2O3]-	0.895737958813955			Organoheterocyclic compounds	Benzopyrans	1-benzopyrans	10045.7	8566.14	8515.97	8744.06	8707.94	2927.71	2706.88	2046.97	2231.9	1077.77	4196.78	1312.48	7917.92	2262.13	3.5002	0.000508012	0.414846
M180T36	180.03300	36.3200	nodiff	Acamprosate	[M-H]-	0.999520107703392	HMDB0014797		Organic acids and derivatives	Organic sulfonic acids and derivatives	Organosulfonic acids and derivatives	45524.8	65039.8	26514.2	52513.8	90307.8	29474.1	65873.8	55170.4	21450.3	29732.2	33020.2	44639.7	51562.4	41647.8	1.23806	0.423693	0.523607
M230T59	230.01235	59.2020	nodiff	Acetaminophen sulfate	[M-H]-	0.994750666987614	HMDB0059911		Organic acids and derivatives	Organic sulfuric acids and derivatives	Arylsulfates	13782.8	18433	7409.54	17706.9	115367	7855.28	4984.73	3642.53	5319.4	4604.61	4588	4447.4	30092.4	4597.78	6.54498	0.168268	0.837285
M119T113	119.04961	113.0790	nodiff	Acetic acid, 2,2'-[oxybis(2,1-ethanediyloxy)]bis-	[M-H-C4H6O3]-	0.705997643652673			Organic acids and derivatives	Carboxylic acids and derivatives	Dicarboxylic acids and derivatives	17559.6	98776.2	8305.4	18996.6	25137.9	14169.6	30535.5	34324.8	61756.9	57520.7	764.741	49342.4	30490.9	39040.8	0.781	0.61783	0.587544
M145T297	145.09777	297.3160	nodiff	Acetylcholine	[M-H]-	0.854316400487127	HMDB0000895	C01996	Organic nitrogen compounds	Organonitrogen compounds	Quaternary ammonium salts	17723	17962.9	31788.1	20744.5	22149	18110.6	34142	10745.5	26524.2	18639.8	13067.4	27194.4	21413	21718.9	0.985918	0.944825	0.293621
M346T421	346.05492	420.6070	nodiff	Adenosine 5'-phosphosulfate	[M-H-O3S]-	0.996150214806323	HMDB0001003	C00224	Nucleosides, nucleotides, and analogues	Purine nucleotides	Purine ribonucleotides	11800.2	14336.6	36708.4	5466.66	6846.92	8121.79	12076.9	3809.41	3423.2	4403.71	16621.7	11299.6	13880.1	8605.74	1.61289	0.339674	0.187936
M462T333	462.09073	333.4125	nodiff	Adenylosuccinate	[M-H]-	0.97850123138891	HMDB0000536	C03794	Nucleosides, nucleotides, and analogues	Purine nucleotides	Purine ribonucleotides	2118.38	2237.87	1280.11	2331.12	6871.4	1801.03	808.231	999.502	484.154	351.03	944.792	714.399	2773.32	717.018	3.86785	0.0345149	0.259801
M331T172	331.26326	171.8520	nodiff	Adrenic Acid	(M-H)-	0.9904						4968.69	3877.69	7688.75	3727.47	2098.02	3529.98	46382.6	28172.5	4497.04	2470.68	46367.4	1225.02	4315.1	21519.2	0.200523	0.0812425	0.712159
M129T106	129.09150	106.0875	nodiff	Agmatine	[M-H]-	0.894427190999916	HMDB0001432	C00179	Organic nitrogen compounds	Organonitrogen compounds	Guanidines	44015.2	37224.8	36733	50623.1	51765	48773.8	38755.6	39110.5	37208.4	37452.6	25506.2	32160.6	44855.8	35032.3	1.28041	0.0178366	0.397467
M274T200	274.09705	200.0060	nodiff	Ala-Trp	[M-H]-	0.800267475718966			Organic acids and derivatives	Carboxylic acids and derivatives	Amino acids, peptides, and analogues	1411.81	1256.89	1251.11	1705.67	977.872	1751.1	1051.72	1077.93	809.646	667.938	1033.91	1157.32	1392.41	966.412	1.44081	0.0137307	0.102923
M359T106	359.18495	106.1450	nodiff	Aldosterone	[M-H]-	0.951632650041689		C01780	Lipids and lipid-like molecules	Steroids and steroid derivatives	Hydroxysteroids	10941.5	13096.2	9773.31	28515.3	20633.4	13349.3	2199.69	3486.23	2505.35	1355.18	2624.41	2161.89	16051.5	2388.79	6.71951	0.00092477	0.702017
M577T163	577.37412	163.2845	nodiff	Alisol a 24-acetate	[M+HCO2]-	0.898683783036057			Lipids and lipid-like molecules	Prenol lipids	Triterpenoids	15016.7	3331.93	5891.65	9843.54	18619.7	9001.83	11132.7	12390.3	3694.2	3342.77	6932.29	8304.12	10284.2	7632.73	1.34739	0.361922	0.277912
M315T62	315.19577	61.5960	nodiff	All-trans-4-hydroxyretinoic acid	[M-H]-	0.995915987740475	HMDB0006254	C16677	Lipids and lipid-like molecules	Prenol lipids	Retinoids	111800	7183.91	4086.58	91068.6	19193.4	7238.2	51945.2	82285.5	57380.1	29994.6	36276.1	50506.5	40095.2	51398	0.780091	0.60332	0.441538
M269T65_2	269.21172	65.0785	nodiff	All-trans-4-ketoretinoic acid	[M-H-CO2]-	0.885550386854529	HMDB0006285		Lipids and lipid-like molecules	Prenol lipids	Retinoids	173842	102239	147233	162749	96014.3	196848	139581	257787	229497	97044.7	213775	201183	146487	189811	0.771753	0.172495	1.26702
M139T282_2	139.02573	282.2940	nodiff	Allantoin	(M-H2O-H)-	0.8599	HMDB0000462	C01551	Organoheterocyclic compounds	Azoles	Imidazoles	1.09198e+06	1.1341e+06	1.42339e+06	392920	1.10856e+06	375040	405088	511995	578451	513375	1.20479e+06	1.6073e+06	920999	803499	1.14623	0.66824	0.397225
M115T74	115.03940	73.5400	nodiff	Alpha-ketoisovaleric acid	[M-H]-	0.975913895797847	HMDB0000019	C00141	Organic acids and derivatives	Keto acids and derivatives	Short-chain keto acids and derivatives	235303	118900	85527.8	251233	94644.8	186461	147492	183764	92668.2	56866.2	210807	147027	162012	139771	1.15912	0.56708	0.389666
M912T408	912.49033	408.4410	nodiff	Alpha-solanine	[M+FA-H]-	0.775044857853282			Lipids and lipid-like molecules	Steroids and steroid derivatives	Steroidal glycosides	314.114	200.67	287.899	255.17	216.2	256.048	565.052	567.374	359.515	212.616	856.148	548.576	255.017	518.214	0.492108	0.0158709	0.103965
M221T384	221.01206	384.0140	nodiff	Aminomethylphosphonic acid	[2M-H]-	0.872832461865869		C11033	Organic acids and derivatives	Organic phosphonic acids and derivatives	Organic phosphonic acids	4085.15	7144.68	5129.38	4870.05	9731.77	4263.88	3721.47	4439.62	2669.65	3021.51	5373.04	4691.38	5870.82	3986.11	1.47282	0.0852107	0.203852
M165T171	164.98367	170.8275	nodiff	Ammelide	(M+K-2H)-	0.6524						5413.12	5250.81	1798.24	6272.89	4781.8	6221.25	5585.71	3791.13	7589.95	7235.25	2819.74	5019.29	4956.35	5340.18	0.928125	0.714506	0.19395
M465T219	465.23746	218.8520	nodiff	Androsterone glucuronide	[M-H]-	0.913406592303634	HMDB0002829	C11135	Lipids and lipid-like molecules	Steroids and steroid derivatives	Steroidal glycosides	122.897	234.134	2926.2	9305.72	511.539	1306.4	41.1528	108.567	701.591	19.9066	75.7419	81.6404	2401.15	171.433	14.0063	0.154751	0.210604
M265T62	265.17991	61.6380	nodiff	Aphyllic acid	[M-H]-	0.806982053511113			Organic acids and derivatives	Carboxylic acids and derivatives	Amino acids, peptides, and analogues	16791.1	9590.66	7645.51	15836.6	6680.09	11990.9	6395.64	10480.8	8317.16	8115.77	9146.96	7098.27	11422.5	8259.11	1.38302	0.112727	0.238428
M311T41	311.29436	40.9185	nodiff	Arachidic acid	[M-H]-	0.99903581617349	HMDB0002212	C06425	Lipids and lipid-like molecules	Fatty Acyls	Fatty acids and conjugates	143951	117825	83910.1	220944	98389.3	93579.2	93401.4	100497	185978	146098	159690	121886	126433	134592	0.939383	0.755009	0.908897
M303T41	303.23275	41.1540	nodiff	Arachidonic acid (peroxide free)	[M-H]-	0.870727022924975	HMDB0001043	C00219	Lipids and lipid-like molecules	Fatty Acyls	Fatty acids and conjugates	3.89001e+06	5.79468e+06	8.27781e+06	825649	2.66481e+06	3.83608e+06	6.71689e+06	6.02251e+06	8.84379e+06	5.42719e+06	5.08383e+06	6.62362e+06	4.21484e+06	6.45297e+06	0.653163	0.0880586	10.3268
M461T108_2	461.32579	108.0435	nodiff	Arachidonoylserotonin	[M-H]-	0.74016010476728			Organoheterocyclic compounds	Indoles and derivatives	Tryptamines and derivatives	24575.9	14133.7	42805.4	22579.7	14527.3	12074.8	59404.9	87505.2	37085.3	11488.1	25494.9	22866.7	21782.8	40640.9	0.535983	0.159243	0.714428
M276T40	276.12672	39.8780	nodiff	Arg-cys	[M-H]-	0.870684607969564			Organic acids and derivatives	Carboxylic acids and derivatives	Amino acids, peptides, and analogues	14607.2	20919.8	15948.5	9118.7	4998.57	6697.21	3390.35	4434.42	4573.75	2614.2	2532.79	3644.8	12048.3	3531.72	3.41146	0.00707423	0.478478
M345T191	345.16957	191.2530	nodiff	Arg-Gly-Asp	[M-H]-	0.939378921903851			Organic acids and derivatives	Carboxylic acids and derivatives	Amino acids, peptides, and analogues	2791.22	5766.81	1819.98	8034.46	24428.4	5136.63	498.996	108.034	1037.37	1192.27	30.9739	577.787	7996.25	574.238	13.925	0.0547576	0.474611
M304T38	304.15811	37.5500	nodiff	Arg-Met	[M-H]-	0.95317903294257			Organic acids and derivatives	Carboxylic acids and derivatives	Amino acids, peptides, and analogues	20888.1	23053.4	28611.8	34063.2	12726.1	15244.5	722097	8331.34	4983.52	5492.09	7310.22	7460.72	22431.2	125946	0.178102	0.405819	1.0413
M487T127	487.34053	127.2770	nodiff	Asiatic acid	[M-H]-	0.998180279311717	HMDB0035782	C08617	Lipids and lipid-like molecules	Prenol lipids	Triterpenoids	7075.35	3101.21	10069.9	8748.19	3205.98	4464.85	9141.85	16870.7	16197.8	10373.4	8891.23	9262.1	6110.92	11789.5	0.518335	0.0150859	0.511514
M539T325	539.25007	324.5090	nodiff	Atorvastatin	[M-H-H2O]-	0.942980256018555	HMDB0005006	C06834	Organoheterocyclic compounds	Pyrroles	Substituted pyrroles	610.655	425.905	116.234	667.253	1722.05	354.439	185.28	194.157	124.081	17.1507	50.2702	77.5511	649.423	108.082	6.00863	0.0410423	0.132429
M408T33	408.30215	32.6580	nodiff	Benzamide, n-(5z,8z,11z,14z)-5,8,11,14-eicosatetraen-1-yl-4-hydroxy-	[M-H]-	0.95700599025963			Benzenoids	Benzene and substituted derivatives	Benzoic acids and derivatives	2653.3	6913.01	4880.14	5364.4	11307	3741.72	1222.77	1050.93	644.317	68.049	1222.33	595.367	5809.93	800.627	7.25673	0.002643	0.425153
M346T59_2	346.16831	59.1950	nodiff	Benzenepropanoic acid, 4-[[(3-phenoxyphenyl)methyl]amino]-	[M-H]-	0.972423084753031			Benzenoids	Benzene and substituted derivatives	Phenylmethylamines	15463.2	12807.9	10566.1	18972.2	9942.68	18442.5	5860.6	6215.89	2308.38	8632.1	6406.38	6968.9	14365.8	6065.37	2.36849	0.000962315	0.526014
M368T386	368.08247	386.3540	nodiff	Benzoic acid, 4-[(1s)-1-[[5-chloro-2-(4-fluorophenoxy)benzoyl]amino]ethyl]-	[M-H-CO2]-	0.767328504596574			Benzenoids	Benzene and substituted derivatives	Benzoic acids and derivatives	3248.9	5531.82	5433.9	3565.9	11251.1	3547.91	4890.83	5731.5	3715.09	1392.33	6138.77	3353.67	5429.92	4203.7	1.2917	0.410285	0.217941
M335T478	335.09394	477.7070	nodiff	Berberine	[M-H]-	0.7322154645902	HMDB0003409	C00757	Alkaloids and derivatives	Protoberberine alkaloids and derivatives		1425.12	1729.43	1824.3	1280.88	1333.02	1280.25	1437.36	2017.33	1666.7	1119.59	1664.71	2438.47	1478.83	1724.02	0.85778	0.272215	0.108645
M259T207	259.01247	206.7290	nodiff	Beta-D-Fructose 6-phosphate	[M-H]-	0.921115577272334	HMDB0003971	C05345	Organic oxygen compounds	Organooxygen compounds	Carbohydrates and carbohydrate conjugates	3048.34	4396.74	3413.55	2682.73	8472.18	3359.86	2952.17	3463.6	2315.18	1138.26	2726.75	2412.18	4228.9	2501.36	1.69064	0.0949103	0.224525
M103T229_2	103.03981	228.9240	nodiff	Beta-hydroxybutyrate	[M-H]-	0.983384374996374	HMDB0000011	C01089	Organic acids and derivatives	Hydroxy acids and derivatives	Beta hydroxy acids and derivatives	184530	413965	169941	209765	95384.1	541052	293167	366667	149231	102889	197356	241487	269106	225133	1.19532	0.594637	0.700858
M251T104	251.16430	104.2950	nodiff	Bisphenol m	[M-H-C6H6O]-	0.932031351692484			Phenylpropanoids and polyketides	Diarylheptanoids	Linear diarylheptanoids	95083.1	50539.4	30111.5	62001.3	139665	24509.4	113209	191651	45932.6	26576.1	23317.5	15814.2	66985	69416.8	0.964968	0.943653	0.736675
M487T389	487.17678	389.4710	nodiff	Blood group b trisaccharide	[M-H]-	0.740913884817391			Organic oxygen compounds	Organooxygen compounds	Carbohydrates and carbohydrate conjugates	7627.92	5335.54	12693	5406.45	15801.6	3846.32	14651.6	18265.6	8893.71	1406.29	21022.2	11423.2	8451.8	12610.4	0.670223	0.257948	0.447952
M399T176	399.18363	176.0900	nodiff	Carbobenzyloxy-l-norvalyl-l-norleucine	[M+Cl]-	0.796904757241432			Organic acids and derivatives	Carboxylic acids and derivatives	Amino acids, peptides, and analogues	110527	7911.86	444.592	33066.4	57244.2	20524.5	4730.37	5554.85	2231.01	787.358	8244.05	3387.28	38286.5	4155.82	9.21274	0.0674297	0.839707
M366T25	366.02652	25.1430	nodiff	Cefaclor	[M-H]-	0.893247219977003	HMDB0014971	C06877	Organic acids and derivatives	Carboxylic acids and derivatives	Amino acids, peptides, and analogues	1027.93	323.309	748.327	221.906	708.751	457.041	4928.33	4695.87	5668.28	11303.9	8398.79	5572.78	581.21	6761.33	0.0859609	0.000171825	0.488007
M318T37	318.17307	37.2155	nodiff	Chloroquine	(M-H)-	0.9504						6317.59	21821.8	8339.09	10118.1	106196	13974	11101.8	10292.5	6717.24	2661.46	6628.2	9093.39	27794.4	7749.11	3.58679	0.235721	0.777563
M465T108_1	465.30356	107.5770	nodiff	Cholesterol 3-sulfate	(M-H)-	0.8629						26183.1	17692.1	22565.3	26002.5	26337.5	17413.5	9598.83	13410.4	15947.6	7545.78	11724.9	9325.76	22699	11258.9	2.0161	0.000316908	0.56557
M293T26_2	293.17814	26.4475	nodiff	Cinchonine	[M-H]-	0.963475136115061	HMDB0030282	C06528				47514.1	74577.3	68730.9	75492.8	70209.3	58693.2	62576.2	133127	39057	40309.6	107498	57985.5	65869.6	73425.6	0.897093	0.652332	0.573495
M204T181	204.06619	181.4630	nodiff	Cinnamoylglycine	[M-H]-	0.84254285090508	HMDB0011621		Organic acids and derivatives	Carboxylic acids and derivatives	Amino acids, peptides, and analogues	6751.75	3471.5	3927.29	6520.87	1943.48	2130.37	10530	19122.8	12784.3	9136.33	9801.89	4272.21	4124.21	10941.3	0.376941	0.0105059	0.50614
M327T41	327.23269	40.6390	nodiff	Cis-4,7,10,13,16,19-docosahexaenoic acid	[M-H]-	0.956811997457936	HMDB0002183	C06429	Lipids and lipid-like molecules	Fatty Acyls	Fatty acids and conjugates	2.59657e+06	1.88839e+06	2.44524e+06	2.19512e+06	982769	2.24347e+06	1.698e+06	1.55821e+06	4.89808e+06	3.09474e+06	1.29895e+06	3.33238e+06	2.0586e+06	2.64673e+06	0.777789	0.360899	6.9708
M129T341	129.01881	341.4770	nodiff	Citraconic acid	(M-H)-	0.9916	HMDB0000634	C02226	Lipids and lipid-like molecules	Fatty Acyls	Fatty acids and conjugates	9497.32	10495.1	12601.2	10345	9271.22	11547	13984.3	13805.4	13121.8	8958.16	16344.5	13299.4	10626.1	13252.3	0.801836	0.0392406	0.374112
M191T492	191.01928	492.2720	nodiff	Citrate	[M-H]-	0.945249773130527	HMDB0000094	C00158	Organic acids and derivatives	Carboxylic acids and derivatives	Tricarboxylic acids and derivatives	6057.29	8097.71	4452.27	5595.87	33410.4	5320.06	3383.61	2859.04	1516.04	1361.74	6098.23	2564.78	10488.9	2963.91	3.53888	0.137753	0.482916
M379T209	379.21124	209.4840	nodiff	Clausarin	[M-H]-	0.977172306052211			Phenylpropanoids and polyketides	Coumarins and derivatives	Pyranocoumarins	5021.75	4428.28	1760.9	6728.81	20314.3	3048.35	784.8	1044.35	870.073	554.561	596.825	525.166	6883.73	729.296	9.43886	0.0509019	0.435128
M347T205_2	347.18466	205.4995	nodiff	Cohumulone	[M-H]-	0.725118457857085						3604.94	1074.18	386.665	3089.12	2851.3	769.634	1806.32	4399.56	1208.2	992.021	1534.96	1305.11	1962.64	1874.36	1.0471	0.910259	0.0769838
M233T12	233.15373	11.7560	nodiff	Confertifoline	(M-H)-	0.6066						41999.8	38383.6	37181.4	40726.8	40432.2	37661.4	39215.6	38084.6	39411.9	38074.2	41239.6	43075.2	39397.6	39850.2	0.988642	0.69512	0.403507
M689T413	689.22627	412.7895	nodiff	Coproporphyrin i	[M+Cl]-	0.762511703282552	HMDB0000643	C05769	Organoheterocyclic compounds	Tetrapyrroles and derivatives	Porphyrins	3627.81	4952.69	3556.49	2002.45	9078.1	4064.34	2107.9	1741.59	1427.46	1022.87	1583.32	1431.46	4546.98	1552.43	2.92894	0.0133368	0.306572
M345T303	345.22703	303.0450	nodiff	Corticosterone	[M-H]-	0.859935503213036	HMDB0001547	C02140	Lipids and lipid-like molecules	Steroids and steroid derivatives	Hydroxysteroids	1836.28	1037.79	582.408	2667.35	3178.39	1625.2	1122.06	891.369	24.8365	56.145	30.7159	809.953	1821.24	489.18	3.72304	0.0139794	0.217656
M367T269	367.10488	269.4265	nodiff	Curcumin	[M-H]-	0.777237281295895	HMDB0002269	C10443	Phenylpropanoids and polyketides	Diarylheptanoids	Linear diarylheptanoids	19982.8	37409.1	150304	25967.2	7231.8	14580	164534	143900	20794.5	7595.83	10375.2	56666.7	42579.2	67311	0.632574	0.507566	0.552669
M150T71	149.99383	71.3045	nodiff	Cyanuric acid	(M+Na-2H)-	0.9994						314790	314256	314521	325316	307386	218173	372453	261313	335729	267359	313334	323392	299074	312263	0.957761	0.590944	1.16297
M540T430	540.05255	429.7900	nodiff	Cyclic adenosine diphosphate ribose	[M-H]-	0.887605247366156		C13050	Organic oxygen compounds	Organooxygen compounds	Carbohydrates and carbohydrate conjugates	12996.4	22148.3	10780.3	7050.83	12975.2	13602.6	14722.3	8053.68	4572.33	8062.11	21089.6	12020.3	13259	11420.1	1.16102	0.572657	0.131026
M242T235	242.07734	235.4740	nodiff	Cytidine	[M-H]-	0.848601718084459	HMDB0000089	C00475	Nucleosides, nucleotides, and analogues	Pyrimidine nucleosides		8675.14	6018.39	2897.05	8642.73	7583.25	5772.93	18485.1	18640	8029.9	5298.65	22272.2	13591.1	6598.25	14386.1	0.458653	0.021345	0.554901
M609T214	609.07780	213.6020	nodiff	Cytidine 2',3'-cyclic monophosphoric acid	[2M-H]-	0.867191770696402			Nucleosides, nucleotides, and analogues	Pyrimidine nucleotides	Cyclic pyrimidine nucleotides	599.388	533.01	1553.99	247.516	364.164	666.809	792.038	24.8766	36.4011	241.224	345.727	442.597	660.812	313.81	2.10577	0.150361	0.0734137
M110T269	110.04671	268.9930	nodiff	Cytosine	[M-H]-	0.990136195304325	HMDB0000630	C00380	Organoheterocyclic compounds	Diazines	Pyrimidines and pyrimidine derivatives	4164.84	4123.13	7501.22	1977.95	4082.13	2658.83	1798.68	1397.03	1678.57	1119.89	1800.83	933.733	4084.68	1454.79	2.80775	0.00775054	0.248812
M295T239	295.06950	238.7925	nodiff	D-Arabinono-1,4-lactone	(2M-H)-	0.7022						2490.6	2267.24	3086.72	2186.9	4071.75	2158.88	3957.05	5055.16	1653.17	1079.97	4885.74	2215.41	2710.35	3141.08	0.86287	0.585309	0.180126
M113T215	113.02351	215.2820	nodiff	D-arabinose	[M-H-2H2O]-	0.742731279032077	HMDB0029942	C00259	Organic oxygen compounds	Organooxygen compounds	Carbohydrates and carbohydrate conjugates	5590.71	10168	4196.24	5032.69	31775.3	4513.34	3347.03	15489.7	2956.14	2573.53	3664	3160.14	10212.7	5198.42	1.96458	0.326822	0.406022
M132T397	132.02953	396.6375	nodiff	D-aspartic acid	[M-H]-	0.944034073875705	HMDB0006483	C00402	Organic acids and derivatives	Carboxylic acids and derivatives	Amino acids, peptides, and analogues	10731.1	17573.3	25803.3	9956.85	7503.07	6488.42	19918	17389.4	20480.8	14783.4	29574.8	10978.7	13009.4	18854.2	0.689998	0.171089	0.47359
M380T281	380.25592	281.0370	nodiff	D-erythro-sphinganine-1-phosphate	[M-H]-	0.996165473518525	HMDB0001383	C01120	Lipids and lipid-like molecules	Sphingolipids	Phosphosphingolipids	26140.2	32905.5	50393.3	19620.1	50536.5	24827.8	15195.9	15572.9	9535.52	8109.26	20874.2	13576.7	34070.6	13810.8	2.46696	0.00567003	0.74827
M179T295	179.05530	295.0920	nodiff	D-fructose	[M-H]-	0.991212609822113	HMDB0062538	C00095	Organic oxygen compounds	Organooxygen compounds	Carbohydrates and carbohydrate conjugates	289782	333031	591337	304333	114646	343967	622050	529694	327337	162248	610945	474935	329516	454535	0.724952	0.222692	1.87162
M259T276	259.01251	275.5710	nodiff	D-fructose 6-phosphate	[M-H]-	0.979991535651577	HMDB0000124	C00085	Organic oxygen compounds	Organooxygen compounds	Carbohydrates and carbohydrate conjugates	11592.9	16721.1	10348.9	11016.4	26824.6	11469.2	10875.1	11240.6	8317.7	3449.96	9042.56	9703.48	14662.2	8771.57	1.67156	0.0656204	0.419493
M177T169	177.03956	169.4590	nodiff	D-glucono-1,5-lactone	[M-H]-	0.886327536572824	HMDB0000150	C00198	Organic oxygen compounds	Organooxygen compounds	Carbohydrates and carbohydrate conjugates	51120.6	101439	62931.3	48542.5	26815.3	49560.1	64709.3	63055.5	65582	79514.2	38879.5	73275.9	56734.8	64169.4	0.884141	0.536329	0.77457
M193T377	193.03446	376.9080	nodiff	D-Glucuronate	[M-H]-	0.968383515574848		C00191	Organic oxygen compounds	Organooxygen compounds	Carbohydrates and carbohydrate conjugates	90330.6	118239	74126.1	115176	234931	99101.1	125336	119523	70426.1	54859.1	152819	88036.5	121984	101833	1.19788	0.487865	1.00145
M149T325	149.04479	325.2610	nodiff	D-lyxose	[M-H]-	0.967358281627251		C00476	Organic oxygen compounds	Organooxygen compounds	Carbohydrates and carbohydrate conjugates	12507.5	12514.7	8576.95	10902.8	55640.9	7402.04	8478.26	9963.9	7431.68	4450.07	9608.21	5243.71	17924.2	7529.3	2.38059	0.203915	0.53959
M163T290	163.06007	290.4860	nodiff	D-Mannitol	(M-H2O-H)-	0.6985	HMDB0000765	C00392	Organic oxygen compounds	Organooxygen compounds	Carbohydrates and carbohydrate conjugates	7298.02	297.932	748.325	5690.32	958.868	226.167	759.056	789.686	236.8	255.891	720.432	407.851	2536.6	528.286	4.80157	0.147105	0.17716
M179T107	179.03441	106.9620	nodiff	D-psicose	[M-H]-	0.740014582182563		C06468	Organic oxygen compounds	Organooxygen compounds	Carbohydrates and carbohydrate conjugates	42181.3	26646.8	9766.38	50466.7	52236	4380.86	7951.65	5372.96	5172.19	5501.28	9451.37	5671.94	30946.3	6520.23	4.7462	0.0162151	0.823925
M223T201_2	223.08144	200.5500	nodiff	D-Quinovose	(M+CH3COO)-	0.9897		C02522				25105.7	18239.9	17548.2	21457.9	11209.3	16937.1	34535.8	26565.3	13742.8	9514.16	25434	20097.7	18416.4	21648.3	0.850707	0.457912	0.272677
M229T105	229.01167	105.4965	nodiff	D-Ribose 5-phosphate	(M-H)-	0.7737	HMDB0001548	C00117	Organic oxygen compounds	Organooxygen compounds	Carbohydrates and carbohydrate conjugates	3213.43	7662.35	5240.39	6316.41	3582.08	6365.28	6555.98	7556.08	11525.9	12865.1	1996.34	11930.8	5396.66	8738.37	0.617582	0.0994595	0.405086
M229T52	229.00191	52.1700	nodiff	D-ribulose 5-phosphate	[M-H]-	0.98599154770302	HMDB0001548	C00199	Organic oxygen compounds	Organooxygen compounds	Carbohydrates and carbohydrate conjugates	41494.6	69459.5	44317.1	33332.8	203684	28067.1	15059.2	16277.2	10298.9	4032.67	13631.3	12359.7	70059.2	11943.2	5.86606	0.0600187	1.31906
M143T200	143.03397	200.1930	nodiff	D-Threitol	(M+Na-2H)-	0.7152	HMDB0004136	C16884	Organic oxygen compounds	Organooxygen compounds	Carbohydrates and carbohydrate conjugates	1109.32	1333.54	1501.77	1531.67	1639.68	1766.73	1304.2	1263.35	1488.22	1568.82	1503.02	994.596	1480.45	1353.7	1.09363	0.347479	0.0569397
M161T382	161.04469	382.0390	nodiff	D-turanose	[M-H-C6H12O6]-	0.814663934366501	HMDB0011740	C19636	Lipids and lipid-like molecules	Fatty Acyls	Fatty acyl glycosides	23294.2	41867.8	27471.2	24152.8	67890.8	33323.4	28506.2	39395.1	28740.9	15537.7	33982.4	26944.9	36333.4	28851.2	1.25934	0.350497	0.443149
M333T28	333.00621	27.9880	nodiff	Daidzein 4'-sulfate	[M-H]-	0.999370388849739			Phenylpropanoids and polyketides	Isoflavonoids	Isoflav-2-enes	33714.3	10657	6028.16	24860.5	23141.9	4002.65	20037.4	7869.81	8080.85	5254.96	5571.92	3732.53	17067.4	8424.58	2.02591	0.142406	0.383432
M417T29	417.20879	28.8430	nodiff	Dauricine	[M-H-C12H16O2N]-	0.983012532255579		C09419	Organoheterocyclic compounds	Isoquinolines and derivatives	Benzylisoquinolines	62695.2	41559.8	32585.8	64578.6	15187.4	47696.8	41862.9	43351.3	28738.6	40552.2	101836	33945.1	44050.6	48381	0.910494	0.75205	0.263952
M129T130	129.01847	129.9960	nodiff	Dehydro-l-(+)-ascorbic acid dimer	[M-H-C7H6O8]-	0.746274567680008			Organoheterocyclic compounds	Furofurans	Isosorbides	81279.8	95266.2	293867	62262.8	70109.7	51761.7	97379.9	137490	42117.8	27279.9	231077	86022.4	109091	103561	1.0534	0.910775	0.300441
M413T109	413.32439	109.4185	nodiff	Delta4-dafachronic acid	[M-H]-	0.775214279301592			Lipids and lipid-like molecules	Steroids and steroid derivatives	Bile acids, alcohols and derivatives	2673.53	2062.4	3850.93	4032.81	1413.29	2575.31	3965.88	6494.49	4424.88	3159.77	3361.94	3101.6	2768.05	4084.76	0.677652	0.0774349	0.232198
M391T155_2	391.28432	155.2345	nodiff	Deoxycholic acid	[M-H]-	0.997955589672078	HMDB0000626	C04483	Lipids and lipid-like molecules	Steroids and steroid derivatives	Bile acids, alcohols and derivatives	41866.1	28566.8	125430	95148.6	33755.4	51482.1	39857.9	67835.8	32327.2	17130.8	32515.2	45403.7	62708.2	39178.4	1.60058	0.203899	0.546918
M251T178	251.07747	178.1870	nodiff	Deoxyinosine	[M-H]-	0.995431241153941	HMDB0000071	C05512	Nucleosides, nucleotides, and analogues	Purine nucleosides	Purine 2'-deoxyribonucleosides	15070.4	12217.5	91711.2	2463.96	19090.8	7684.3	4896.28	3539.08	4211.81	4541.55	4139.33	2780.89	24706.4	4018.16	6.14868	0.159472	0.523878
M585T241	585.30368	240.9270	nodiff	Desferrioxamine d2	[M-H]-	0.907431580538254						602.609	520.705	627.49	991.347	584.953	657.898	825.791	1066.15	606.257	263.388	988.669	617.017	664.167	727.878	0.91247	0.654925	0.0481265
M363T169	363.21685	169.3720	nodiff	Dhas#18	[M-H]-	0.991921722095774			Organic oxygen compounds	Organooxygen compounds	Carbohydrates and carbohydrate conjugates	86094	138039	17614.5	181025	1.05258e+06	141470	1828.37	1831.98	1547.37	1644.23	3024.06	4967.62	269471	2473.94	108.924	0.122575	2.85168
M160T182	160.07628	182.3660	nodiff	Diflufenzopyr	[M-H-C7H5F2NO2]-	0.740022488396825			Benzenoids	Benzene and substituted derivatives	N-phenylureas	2326.95	618.517	1323.16	724.746	435.419	409.918	3970.34	5516.16	4218.54	2905.87	3688.01	284.541	973.118	3430.58	0.28366	0.0103198	0.298052
M127T409	127.05053	408.9620	nodiff	Dihydro-4,4-dimethyl-2,3-furandione	[M-H]-	0.936793032685861		C01125	Organoheterocyclic compounds	Lactones	Gamma butyrolactones	78823.2	53295	74584	73059.5	36499.8	72137.3	25637.9	104519	50985.1	60178.2	96402.9	85829.1	64733.1	70592	0.917004	0.685209	0.53095
M149T103	149.06001	103.1380	nodiff	Dihydroisoferulic acid	[M-H-CH2O2]-	0.859189895063482	HMDB0131138					108111	30176.6	45955	63693.5	31883	47958	55670.3	77738	43655.7	31273.5	54031.4	41814.2	54629.5	50697.2	1.07756	0.776449	0.0910356
M165T281	165.00491	280.7460	nodiff	Dihydrothymine	(M+K-2H)-	0.9559	HMDB0000079	C00906	Organoheterocyclic compounds	Diazines	Pyrimidines and pyrimidine derivatives	108724	110224	127565	109555	122165	100055	111197	230794	103875	65148.7	253606	101129	113048	144292	0.783469	0.35243	1.11782
M227T35	227.07660	35.0730	nodiff	Dihydrouracil	(2M-H)-	0.9697	HMDB0000076	C00429	Organoheterocyclic compounds	Diazines	Pyrimidines and pyrimidine derivatives	10376.1	10508.7	11733.2	10368.5	11195	8215.64	5954.33	12532.2	8047.92	9363.08	16301.2	7677.08	10399.5	9979.31	1.04211	0.801282	0.0779598
M779T182	779.48313	181.9070	nodiff	Dioleoylglycerol pyrophosphate	[M-H]-	0.738748142784846			Lipids and lipid-like molecules	Glycerophospholipids	Glycero-3-pyrophosphates	2686.2	2607.55	5748.61	3115.14	2697.43	2484.71	4272.71	4022.52	1497.61	815.158	3910.86	3122.19	3223.27	2940.17	1.09629	0.725241	0.0592111
M165T137	165.05498	137.4630	nodiff	DL-3-Phenyllactic acid	(M-H)-	0.7248	HMDB0000779/HMDB0014712	C01479	Phenylpropanoids and polyketides	Phenylpropanoic acids/Tropane alkaloids		32568.1	10141.5	4312.15	33703	36064.8	9977.45	2808.32	6139.97	3390.17	4058.51	6084.62	4765.26	21127.8	4541.14	4.65254	0.0186543	0.677185
M169T301	169.03066	300.5680	nodiff	Dl-3,4-dihydroxyphenyl glycol	[M-H]-	0.839805344541744	HMDB0000318	C05576	Benzenoids	Phenols	Benzenediols	11619.1	11812.8	10720.9	11535.5	7747.88	4335.46	11123.3	10056.1	13486.7	11552.5	9346.36	12184.7	9628.61	11291.6	0.852722	0.252025	0.337108
M89T221_2	89.02431	221.2070	nodiff	Dl-lactate	[M-H]-	0.987367425660762	HMDB0001311/HMDB0000190	C01432	Organic acids and derivatives	Hydroxy acids and derivatives	Alpha hydroxy acids and derivatives	3.15521e+06	2.36807e+06	3.19988e+06	2.27626e+06	2.05473e+06	2.70291e+06	4.04216e+06	4.80833e+06	3.51016e+06	303505	4.12167e+06	2.94082e+06	2.62618e+06	3.28777e+06	0.79877	0.352044	4.49971
M164T297	164.03474	297.3440	nodiff	DL-Methionine sulfoxide	(M-H)-	0.959	HMDB0002005	C02989	Organic acids and derivatives	Carboxylic acids and derivatives	Amino acids, peptides, and analogues	11160.7	7173.45	11184.5	9047.23	7926	9474.64	5907.77	9902.13	8644.85	9349.45	7381.05	10660.3	9327.75	8640.93	1.07949	0.49887	0.226822
M229T284	229.14364	283.6070	nodiff	Dodecanedioic acid	[M-H]-	0.749799874812345	HMDB0000623	C02678	Lipids and lipid-like molecules	Fatty Acyls	Fatty acids and conjugates	6924.03	4540.94	2118.49	9077.6	3326.76	7511.59	2312.2	3299.67	2062.31	3639.23	2238.14	1220.76	5583.24	2462.05	2.26772	0.0219024	0.296837
M199T53	199.16982	53.1915	nodiff	Dodecanoic acid	(M-H)-	0.8563	HMDB0000638	C02679	Lipids and lipid-like molecules	Fatty Acyls	Fatty acids and conjugates	257863	128725	125368	186350	69078.9	463422	223601	313156	412985	318879	252841	294817	205135	302713	0.677653	0.156816	1.96338
M555T155	555.27221	155.1915	nodiff	Dronedarone	[M-H]-	0.729614442489542			Organic oxygen compounds	Organooxygen compounds	Carbonyl compounds	42926.4	12282.6	44744.4	23422.5	11191.5	24813.8	22673.9	23063.4	17301.5	10579.2	26561.9	10605.1	26563.5	18464.2	1.43865	0.243505	0.274848
M301T41	301.21652	40.6410	nodiff	Eicosapentaenoic Acid	(M-H)-	0.6755	HMDB0001999	C06428	Lipids and lipid-like molecules	Fatty Acyls	Fatty acids and conjugates	241739	193726	143583	145583	249667	81113.5	223019	243117	228719	118814	189122	196124	175902	199819	0.880306	0.473841	0.992659
M309T165	309.27902	165.1050	nodiff	Eicosenoic acid	[M-H]-	0.977491196261013		C16526	Lipids and lipid-like molecules	Fatty Acyls	Fatty acids and conjugates	5603.04	2639.56	3511.5	6393.16	6056.18	7364.73	1811.53	1888.26	1453.99	1382.9	2118.64	1343.13	5261.36	1666.41	3.15731	0.000734002	0.353905
M337T26	337.20446	25.8230	nodiff	Eplerenone hydroxy acid	[M-H-C2H6O4]-	0.897904999220608						18903.2	34001.4	40636.7	25721	24383.8	32721.1	24185	67029.3	12775.4	15104.7	40559	22234.5	29394.5	30314.6	0.969648	0.920134	0.23544
M423T286	423.12998	286.1090	nodiff	Eprosartan	[M-H]-	0.762516913817607	HMDB0015014	C07467	Benzenoids	Benzene and substituted derivatives	Benzoic acids and derivatives	2977.55	15331	1679.42	3765.46	6796.72	18595.9	824.063	835.052	1083.84	589.752	1085.32	1325.32	8191.01	957.224	8.55704	0.0313168	0.471082
M324T29_2	324.16789	29.2985	nodiff	Ergonovine	[M-H]-	0.931089586823898	HMDB0015383	C07543	Alkaloids and derivatives	Ergoline and derivatives	Lysergic acids and derivatives	10546.7	9470.49	8090.64	12455.5	5128	10865.3	11242.1	21212	7156.46	9903.86	42110.2	10600.2	9426.1	17037.5	0.553257	0.195339	0.447847
M337T41_2	337.31022	40.6390	nodiff	Erucic acid	[M-H]-	0.998264156877149	HMDB0002068	C08316	Lipids and lipid-like molecules	Fatty Acyls	Fatty acids and conjugates	75537.3	52527.4	50245.6	65919.2	26592	61884.9	76801.8	69933.1	95298.9	74708.2	49574.3	31119.1	55451	66239.2	0.837133	0.370757	0.798217
M143T295	143.03412	295.0890	nodiff	Erythritol	(M+Na-2H)-	0.6409	HMDB0002994/HMDB0094689	C00503	Organic oxygen compounds	Organooxygen compounds	Carbohydrates and carbohydrate conjugates	23172.4	25043.5	46927.5	24459.7	10399.5	25804.4	44654	44431.6	26826.3	14857.4	44220.2	33917.8	25967.8	34817.9	0.745819	0.229317	0.523947
M339T312	339.08457	311.6570	nodiff	Esculin	[M-H]-	0.795671255996426	HMDB0030820	C09264	Phenylpropanoids and polyketides	Coumarins and derivatives	Coumarin glycosides	2188.25	2119.77	3599.57	2021.33	3644.51	1930.26	1914.37	1776.36	1214	1699.53	2207.36	1920.16	2583.95	1788.63	1.44465	0.0499176	0.102664
M427T245	427.19649	244.9440	nodiff	Estrone glucuronide	[M-H-H2O]-	0.967692894548551	HMDB0004483	C11133	Lipids and lipid-like molecules	Steroids and steroid derivatives	Steroidal glycosides	12842	6265.23	2924.72	5549.09	21628.3	4883.72	8135.17	23375.2	8138.07	3528.59	5864.18	5067.32	9015.51	9018.08	0.999715	0.999515	0.270222
M302T39	302.14264	38.6710	nodiff	Evodiamine	[M-H]-	0.881729583428356		C09187	Organoheterocyclic compounds	Indoles and derivatives	Pyridoindoles	13376.2	22955	11154.4	16955.4	12636.7	6644.57	6420.27	4618.44	4442.9	3054.72	5035.21	4426.24	13953.7	4666.3	2.99032	0.002397	0.529755
M297T60	297.24289	60.3240	nodiff	Fa 18:1+1o	[M-H]-	0.951250473161868	HMDB0061650	C19418	Lipids and lipid-like molecules	Fatty Acyls	Lineolic acids and derivatives	334455	134927	347509	307222	44621.1	419193	290666	730513	380636	254098	526980	308838	264655	415288	0.637279	0.142454	2.16746
M221T36	221.04812	35.6925	nodiff	Flavone	[M-H]-	0.70814526535808	HMDB0003075	C10043	Phenylpropanoids and polyketides	Flavonoids	Flavones	25706.5	48591.8	27008.9	34748.8	24487.6	30697.7	23402.5	25376.3	26216.4	21168	18346.8	24403	31873.6	23152.2	1.3767	0.0477006	0.423003
M332T331	332.10108	331.4470	nodiff	Flurtamone	[M-H]-	0.742525101411748			Benzenoids	Benzene and substituted derivatives	Trifluoromethylbenzenes	1056.41	747.413	1101.59	805.487	933.161	899.015	739.395	659.055	583.256	652.722	783.95	780.16	923.845	699.756	1.32024	0.0063697	0.0617468
M164T63	164.03492	63.1180	nodiff	Formylanthranilic acid	[M-H]-	0.941473915283005	HMDB0004089	C05653	Benzenoids	Benzene and substituted derivatives	Benzoic acids and derivatives	4783.31	17904	4443	4332.56	31244.6	10621.4	8172.37	4356.85	3690.83	5914.25	5203.13	4144.06	12221.5	5246.91	2.32927	0.146315	0.426
M197T380	197.02095	379.9865	nodiff	Fosfomycin	(M+CH3COO)-	0.8329						8339.97	6616.08	8093.37	8132.68	6616.83	4831.35	18788.8	20574.7	14543.9	10066.2	17935.7	12258.8	7105.05	15694.7	0.452705	0.000628953	0.627461
M259T61	259.01256	61.1255	nodiff	Fructose 1-phosphate	[M-H]-	0.984323510601581	HMDB0001076	C01094	Organic oxygen compounds	Organooxygen compounds	Carbohydrates and carbohydrate conjugates	23296.5	22549.1	13428.2	26717.5	53588	29359.9	10529.5	13009.7	6312.3	5727.55	9316.55	7666.11	28156.5	8760.28	3.21411	0.00645432	0.837382
M195T490	195.05027	490.0790	nodiff	Galactonic acid	(M-H)-	0.6664	HMDB0000565	C00880	Organic acids and derivatives	Hydroxy acids and derivatives	Medium-chain hydroxy acids and derivatives	8211.69	14186.1	9717.83	8512.53	11884.1	9594.8	22677.7	37718.9	11907.2	9120.24	26724.7	20647	10351.2	21466	0.482213	0.0281762	0.661028
M249T132	249.06263	132.2885	nodiff	Gamma-Glu-Cys	[M-H]-	0.99765506689498	HMDB0001049	C00669	Organic acids and derivatives	Carboxylic acids and derivatives	Amino acids, peptides, and analogues	3629.91	2454.26	2794.35	1677.11	3208.45	2119.29	1972.71	5883.28	3188.11	2295.49	4709.43	3424.34	2647.23	3578.89	0.739678	0.195809	0.195584
M497T30	497.29177	29.8600	nodiff	Ganoderic acid a	[M-H-H2O]-	0.842724683671973			Lipids and lipid-like molecules	Prenol lipids	Triterpenoids	13348.1	7165.52	12248.3	27215.9	7358.45	17635.3	7127.51	10800	2755.96	2722.21	7024.58	3980.12	14161.9	5735.06	2.46936	0.0297726	0.482873
M330T37	330.17350	36.9330	nodiff	Gatifloxacin	[M-H-CO2]-	0.965955063049212	HMDB0015178	C07661	Organoheterocyclic compounds	Quinolines and derivatives	Quinoline carboxylic acids	43554.7	37535.2	28586.2	71106.3	58580.1	52454.9	33336.9	23252.6	8284.96	9831.52	23906.9	72748.3	48636.2	28560.2	1.70294	0.11101	0.621952
M345T94_2	345.26200	94.4300	nodiff	Ginkgolic acid i	[M-H]-	0.96093551192509		C10794	Benzenoids	Benzene and substituted derivatives	Benzoic acids and derivatives	2465.51	117.405	519.653	3190.57	752.817	1203.04	8273.71	4708.51	14612.7	7196.78	9593.28	2580.48	1374.83	7827.57	0.17564	0.00452965	0.492365
M246T379	246.09754	378.6845	nodiff	Gln-thr	[M-H]-	0.74271500446747	HMDB0028807		Organic acids and derivatives	Carboxylic acids and derivatives	Amino acids, peptides, and analogues	1786.95	1689.26	2231.97	2041.15	2209.17	2119.04	4705.11	10266.6	3706.6	1566.8	4135.64	4291.37	2012.92	4778.68	0.42123	0.0424903	0.310676
M259T345	259.12901	344.6730	nodiff	Glu-Leu	[M-H]-	0.814856900286605	HMDB0028823		Organic acids and derivatives	Carboxylic acids and derivatives	Amino acids, peptides, and analogues	2026.63	2774.06	3911.3	3123.94	1868.93	1727.01	1919.86	2330.8	1809.88	2674.9	4011.83	2862.48	2571.98	2601.62	0.988605	0.951832	0.0939916
M193T380	192.98776	379.8285	nodiff	Glucuronate	[M-H]-	0.844456788869016			Organic oxygen compounds	Organooxygen compounds	Carbohydrates and carbohydrate conjugates	6449.37	3830.56	5314.55	5872.52	3789.26	4753.64	11874.5	14580.1	7432.16	5932.61	11734.9	7062.81	5001.65	9769.52	0.511965	0.00880833	0.445739
M119T44	119.01625	43.8325	nodiff	Glufosinate	[M-H-CH3NO2]-	0.745775250208173		C05042	Organic acids and derivatives	Carboxylic acids and derivatives	Amino acids, peptides, and analogues	21541.6	22759.8	22417.1	21765.5	23189.4	12164.4	16539	17905.7	22440.5	31798.8	20196.1	21129	20639.6	21668.2	0.952531	0.720456	0.392554
M145T380	145.06153	379.5610	nodiff	Glutamine	[M-H]-	0.932633430764748	HMDB0000641	C00064	Organic acids and derivatives	Carboxylic acids and derivatives	Amino acids, peptides, and analogues	1.4932e+06	1.05613e+06	1.60405e+06	794803	857658	1.25465e+06	1.38306e+06	1.40678e+06	630426	477076	890423	1.07421e+06	1.17675e+06	976995	1.20446	0.357691	1.03337
M611T572	611.14316	571.8270	nodiff	Glutathione disulfide	(M-H)-	0.7947	HMDB0003337	C00127	Organic acids and derivatives	Carboxylic acids and derivatives	Amino acids, peptides, and analogues	9486.61	2286.91	10783.7	9795.42	9756.34	9337.72	9623.78	9090.85	10768.9	9228.59	7075.75	6530.4	8574.46	8719.71	0.983343	0.921282	0.184905
M339T29	339.19989	28.6000	nodiff	Gly-His-Lys	[M-H]-	0.991993225837818			Organic acids and derivatives	Carboxylic acids and derivatives	Amino acids, peptides, and analogues	933161	1.02396e+06	985292	917802	411213	962212	820811	2.65457e+06	553188	993362	2.92285e+06	1.01211e+06	872274	1.49281e+06	0.584315	0.176876	4.10783
M153T380_1	152.99509	380.0380	nodiff	Glycerol 3-phosphate	(M-H2O-H)-	0.9992	HMDB0000126	C00093	Lipids and lipid-like molecules	Glycerophospholipids	Glycerophosphates	18089.7	10339.6	14524.4	14469.2	11955.1	11768	32806.8	40254.5	33072	25644.6	32104.9	23596.7	13524.3	31246.6	0.432826	6.03945e-05	0.904059
M464T137	464.31346	137.4720	nodiff	Glycocholic acid	[M-H]-	0.918265659381392	HMDB0000138	C01921	Lipids and lipid-like molecules	Steroids and steroid derivatives	Bile acids, alcohols and derivatives	14489.2	16283.9	20967.8	15830	14684.7	9603.57	17973.8	15549.2	23298.3	8599.55	23105.7	14915.3	15309.9	17240.3	0.888027	0.49359	0.29005
M116T276	116.03461	275.6475	nodiff	Guanidoacetic acid	[M-H]-	0.994725628468406	HMDB0000128	C00581	Organic acids and derivatives	Carboxylic acids and derivatives	Amino acids, peptides, and analogues	12031.8	10554.1	12493.3	10521.3	6496.21	12437.5	35296.3	37553.1	15544.2	18318.8	35783	26122.6	10755.7	28103	0.382724	0.0015065	0.840266
M681T162	681.15125	162.0100	nodiff	Haploside d	[M-H]-	0.861244565198576			Phenylpropanoids and polyketides	Flavonoids	Flavonoid glycosides	3127.48	2470.99	9094.66	2503.26	2420.38	2904.08	4429.45	6228.22	2160.92	1362.85	5880.97	4253.83	3753.47	4052.71	0.926164	0.827524	0.0878419
M325T39	325.30971	39.4155	nodiff	Heneicosanoic acid	[M-H]-	0.975622335141356	HMDB0002345		Lipids and lipid-like molecules	Fatty Acyls	Fatty acids and conjugates	19669.7	17589	28545.4	22827.4	12449.1	10439.7	17932.1	37877.9	32742	17600	9074.86	29707.1	18586.7	24155.7	0.769457	0.313329	0.515168
M301T288	301.04335	288.0130	nodiff	Herbacetin	[M-H]-	0.87694908909841			Phenylpropanoids and polyketides	Flavonoids	Flavones	4160.18	5759.53	4316.33	6014.62	1046.75	5331.98	6221.4	4832.07	6741.22	5768.31	5215.97	6448.19	4438.23	5871.19	0.755934	0.104751	0.275118
M777T199	777.42033	199.3450	nodiff	Heterophyllin b	[M-H]-	0.988118516671933			Organic acids and derivatives	Carboxylic acids and derivatives	Amino acids, peptides, and analogues	4036.19	4529.97	5411.02	3485.87	3245	4654.55	4510.01	4579.45	748.366	509.377	4786.25	3279.78	4227.1	3068.87	1.37741	0.210851	0.163108
M395T40	395.38770	40.2965	nodiff	Hexacosanoic acid	[M-H]-	0.967259594670719	HMDB0002356	C21931	Lipids and lipid-like molecules	Fatty Acyls	Fatty acids and conjugates	16045.6	12278.6	9914.01	16066	11411.3	7374.43	7188.7	10575.3	9597.29	4462.06	4302.97	5004.77	12181.6	6855.19	1.777	0.0138676	0.338902
M285T217	285.20605	216.6590	nodiff	Hexadecanedioic acid	[M-H]-	0.989378766775919	HMDB0000672	C19615	Lipids and lipid-like molecules	Fatty Acyls	Fatty acids and conjugates	29952.4	22853.1	18270.1	29351.1	17652.5	27017.8	4239.96	6912.64	5048.91	2485.38	4299.66	3234.24	24182.8	4370.13	5.53366	6.21144e-06	0.872626
M341T108	341.26901	107.5850	nodiff	Hexadecanedioic acid, 3,3,14,14-tetramethyl-	[M-H]-	0.915295924013483			Lipids and lipid-like molecules	Fatty Acyls	Fatty acids and conjugates	9112.89	8515.64	5722.14	11465.9	10892	8682.96	4123.85	6978.11	6564.87	5611.89	3492.09	4327.93	9065.27	5183.12	1.749	0.00329629	0.314336
M178T188	178.05018	187.9350	nodiff	Hippuric acid	[M-H]-	0.991794452901093	HMDB0000714	C01586	Benzenoids	Benzene and substituted derivatives	Benzoic acids and derivatives	32348.3	18475.4	14786.8	18528	54067.4	9588.74	12617.6	21039.2	20863.6	33028.4	11920.7	7371.07	24632.5	17806.8	1.38332	0.392009	0.1361
M257T93	257.07729	92.6145	nodiff	His-Cys	[M-H]-	0.937947499439486	HMDB0000884					11009.2	15649.2	15930.2	9385.61	12647.8	13826.5	9405.03	8145.33	7062.08	5024	11940.7	10049.4	13074.8	8604.43	1.51954	0.011389	0.316461
M282T257	282.08355	256.9200	nodiff	His-Lys	[M-H]-	0.995210183717811	HMDB0000133	C00387				9492.3	36791.8	40035.5	2733.32	21066.5	28637.4	2068.2	1847.97	1556.58	1588.89	2143.26	1874.02	23126.1	1846.49	12.5244	0.00573218	0.794288
M251T309	251.10048	309.3620	nodiff	His-Pro	[M-H]-	0.956272721613001			Organic acids and derivatives	Carboxylic acids and derivatives	Amino acids, peptides, and analogues	9985.05	6723.57	5255.37	9205.25	5301.91	5069.43	3234.92	2384.69	2117.68	1717.82	2789.97	2168.53	6923.43	2402.27	2.88204	0.000569277	0.381392
M241T105	241.08235	104.8240	nodiff	His-ser	[M-H]-	0.99908991362404	HMDB0000273	C00214	Nucleosides, nucleotides, and analogues	Pyrimidine nucleosides	Pyrimidine 2'-deoxyribonucleosides	189659	257328	2.49313e+06	309977	269867	178808	401628	327750	215159	330364	539084	399920	616461	368984	1.6707	0.527898	1.38575
M340T45	340.15705	44.8930	nodiff	His-Trp	[M-H]-	0.97714526603633			Organic acids and derivatives	Carboxylic acids and derivatives	Amino acids, peptides, and analogues	4315.65	4421.82	4333.35	4093.21	2070.77	14662.6	10375.5	8858.91	5778.94	13350.3	15918.6	11278.6	5649.57	10926.8	0.517038	0.0473155	0.375451
M261T243	261.00660	243.3750	nodiff	Homovanillic acid sulfate	[M-H]-	0.96876923868597	HMDB0011719		Organic acids and derivatives	Organic sulfuric acids and derivatives	Arylsulfates	5490.73	6267.98	2429.21	6093.72	73455.1	5654.96	2296.26	2840.02	1079.54	719.437	4155.83	13763.5	16565.3	4142.43	3.99893	0.307975	0.596253
M403T29	403.19314	28.9185	nodiff	hydrocortisone 21-acetate	[M-H]-	0.983865305239471		C02821	Lipids and lipid-like molecules	Steroids and steroid derivatives	Pregnane steroids	8082.78	6356.79	4459.86	14189.2	4176.04	6881.62	8777.62	7138.16	5100.43	7077.32	20246.3	3707.8	7357.71	8674.6	0.84819	0.653618	0.128222
M325T29	325.18411	28.8090	nodiff	Hydroquinidine	[M-H]-	0.998799204457199		C10696				1.08367e+06	933126	1.1203e+06	1.29738e+06	509886	1.12074e+06	1.25931e+06	2.30524e+06	647518	1.31644e+06	6.11183e+06	1.45326e+06	1.01085e+06	2.18227e+06	0.463211	0.185013	5.50437
M109T25	109.02872	25.4510	nodiff	Hydroquinone	[M-H]-	0.997210454196266	HMDB0002434	C00530	Benzenoids	Phenols	Benzenediols	27330.2	23056.6	66987.4	36304.6	54662.4	8420.98	21919.4	27490.8	34410.6	25521.2	10689.2	7204.09	36127	21205.9	1.70363	0.156894	0.367686
M131T229	131.07052	229.0745	nodiff	Hydroxyisocaproic acid	(M-H)-	0.6485	HMDB0000624	C03264	Lipids and lipid-like molecules	Fatty Acyls	Fatty acids and conjugates	3435.15	2567.63	2106.23	2712.33	2160.66	2716.16	3162.12	3733.34	2466.91	3814.8	3151.38	2699.2	2616.36	3171.29	0.825015	0.089287	0.151591
M323T30	323.16794	29.6445	nodiff	Hymeglusin	[M-H]-	0.99856676782489			Lipids and lipid-like molecules	Fatty Acyls	Fatty acids and conjugates	16134.2	14998	20222.3	27766.5	11259	15694.6	19049.9	36541.5	11863.8	15498.8	86613.7	16738.1	17679.1	31051	0.569357	0.28691	0.578269
M227T118	227.06679	118.4705	nodiff	Ile-Pro	[M-H]-	0.980060797766708	HMDB0000012	C00526	Nucleosides, nucleotides, and analogues	Pyrimidine nucleosides	Pyrimidine 2'-deoxyribonucleosides	74917.7	113288	494261	100674	75713.5	68690.4	174940	146610	88030	127082	208948	173311	154591	153154	1.00938	0.984124	0.6641
M202T73	202.05034	72.7080	nodiff	Indole-3-pyruvic acid	(M-H)-	0.7643	HMDB0060484	C00331	Organoheterocyclic compounds	Indoles and derivatives	Indolyl carboxylic acids and derivatives	52498.1	36698	23132.2	26132.1	7864.48	10746.6	33189.8	30885.9	10106.9	3862.53	42203.3	27368.2	26178.6	24602.8	1.06405	0.865244	0.155903
M142T107	142.06536	106.6860	nodiff	Indoleacrylic acid	[M-H-CO2]-	0.942400173046867	HMDB0000734		Organoheterocyclic compounds	Indoles and derivatives	Indoles	74518.9	48396	20879.8	49557.5	21385.5	11904.9	56244.9	40652.6	32486.2	35381.2	43287.6	43968	37773.8	42003.4	0.899302	0.689394	0.332055
M212T29_1	212.00272	29.4755	nodiff	Indoxyl sulfate	[M-H]-	0.995776018110148	HMDB0000682		Organic acids and derivatives	Organic sulfuric acids and derivatives	Arylsulfates	2.12425e+07	2.85489e+07	8.99072e+06	2.01898e+07	9.38526e+07	1.87625e+07	7.2694e+06	7.75154e+06	9.31477e+06	6.12824e+06	5.48386e+06	4.48277e+06	3.19312e+07	6.73843e+06	4.73867	0.0747351	27.017
M708T137	707.50038	137.4630	nodiff	Ionomycin	[M-H]-	0.704549392893207			Lipids and lipid-like molecules	Prenol lipids	Terpene glycosides	6054.6	9565.27	6112.93	8615.62	9285.78	6446.25	4760.89	3256.4	6929.94	4715.88	9255.68	9530.13	7680.07	6408.15	1.19848	0.334798	0.0576245
M367T384	367.10459	383.7330	nodiff	Isoanhydroicaritin	[M-H]-	0.984609522979065			Phenylpropanoids and polyketides	Flavonoids	Flavones	13252.6	24872.5	27126.7	13944.1	53128.8	12646.5	25462.5	27280	13521.1	4387.74	27949.8	15832.2	24161.9	19072.2	1.26686	0.507925	0.501656
M144T277	144.06643	277.4105	nodiff	Isobutyrylglycine	(M-H)-	0.971	HMDB0000730		Organic acids and derivatives	Carboxylic acids and derivatives	Amino acids, peptides, and analogues	14949.7	12063	14914.8	15226.4	2631.6	14453.4	13092.5	14248.3	14427.4	15569.6	13155.6	13940.7	12373.2	14072.3	0.879253	0.424202	0.404628
M373T83	373.29528	83.0480	nodiff	Isodeoxycholic acid	[M-H-H2O]-	0.975218531559724	HMDB0002536	C17661	Lipids and lipid-like molecules	Steroids and steroid derivatives	Bile acids, alcohols and derivatives	1147.75	80.0029	948.821	1152	208.923	207.179	6074.77	4403.99	10547.8	4720.46	5593.01	2438.17	624.113	5629.7	0.110861	0.00126276	0.446429
M217T30	217.01711	30.1625	nodiff	Isoevernic acid	[M+Cl]-	0.820743501241025			Benzenoids	Benzene and substituted derivatives	Benzoic acids and derivatives	155005	157049	64439.5	243198	762329	49860.1	31368.5	57143.6	64786.9	29264.9	41813.9	23080.8	238647	41243.1	5.78635	0.0997558	2.34566
M221T303	221.06536	303.1740	nodiff	Isomaltose	[M-H-C4H8O4]-	0.771922494626191	HMDB0002923	C00252	Lipids and lipid-like molecules	Fatty Acyls	Fatty acyl glycosides	2262.26	4330.18	2866.72	1857.18	4238.44	1547.56	2899.1	4366.31	2385.89	688.295	6377.43	3284.53	2850.39	3333.59	0.855051	0.61207	0.171524
M353T152	353.23267	152.1585	nodiff	Isoprostaglandin-f2.alpha.-iv	[M-H]-	0.846483623489209			Lipids and lipid-like molecules	Fatty Acyls	Eicosanoids	16670.2	8188.01	3168.31	11927.3	25025.7	6030.18	17988.8	23916.2	6675.36	6549.57	16581.1	13793.2	11835	14250.7	0.830483	0.58479	0.397082
M158T191	158.08154	191.3265	nodiff	Isovalerylglycine	[M-H]-	0.994069888438333	HMDB0000678		Organic acids and derivatives	Carboxylic acids and derivatives	Amino acids, peptides, and analogues	111885	23130.3	27175.2	31529.4	126802	50362.7	28488.9	41752.7	31651.8	36929.2	56933.9	28121.9	61814.1	37313.1	1.65664	0.231059	0.58156
M191T62	191.10704	62.2500	nodiff	Jasmonic acid	(M-H2O-H)-	0.7066	HMDB0032797	C08491	Lipids and lipid-like molecules	Fatty Acyls	Lineolic acids and derivatives	9271.9	8069.73	8151.61	8555.54	7534.24	6277.47	27399.4	33406.5	22925.4	27903.3	40047.4	29192.3	7976.75	30145.7	0.264606	3.87875e-06	0.990504
M529T37	529.28344	36.9270	nodiff	Kukoamine a	[M-H]-	0.983715945007097	HMDB0030392		Benzenoids	Phenols	Benzenediols	8400.52	5219.06	22537.9	42322.9	6517.55	15365.4	6617.88	10194.7	3104.82	1723.81	8087.7	5162.45	16727.2	5815.23	2.87645	0.0943923	0.483511
M188T187	188.03420	186.5430	nodiff	Kynurenic acid	[M-H]-	0.999897326577239	HMDB0000715	C01717	Organoheterocyclic compounds	Quinolines and derivatives	Quinoline carboxylic acids	7187.81	5426.85	2947.96	4625.18	7058.55	3959.78	10089.1	7566.88	6357.54	7616.07	24022	5083.7	5201.02	10122.5	0.513806	0.125505	0.386256
M239T410	239.11421	409.7760	nodiff	L-Anserine	(M-H)-	0.6783	HMDB0000194	C01262	Organic acids and derivatives	Peptidomimetics	Hybrid peptides	103518	36077	35607.1	72695.7	98011.3	61818.5	69811.2	42387.9	22734.1	28666.4	80305.6	47324.6	67954.6	48538.3	1.40002	0.22786	0.656851
M131T405	131.04565	405.3715	nodiff	L-Asparagine	(M-H)-	0.7988	HMDB0000168	C00152				6457.06	5398.98	21305.9	11532.7	5331.73	11588.4	12268.5	11610	8507.33	7963.76	7618.04	8577.42	10269.1	9424.17	1.08966	0.754664	0.178526
M225T422	225.09859	422.2860	nodiff	L-Carnosine	[M-H]-	0.993409647538711	HMDB0000033	C00386	Organic acids and derivatives	Peptidomimetics	Hybrid peptides	24913	21821.5	15368.4	20261.4	43461.1	16903.9	47956.8	38232.1	23237.3	11026	38937.1	32408.2	23788.2	31966.3	0.744167	0.255868	0.628092
M180T387	180.08712	387.0550	nodiff	L-Fucose	(M+NH4-2H)-	0.9197	HMDB0000174	C01019	Organic oxygen compounds	Organooxygen compounds	Carbohydrates and carbohydrate conjugates	4165.49	3043.39	11710	3973.3	1284.05	4103.74	10214.2	10647.9	5521.19	1781.69	10407.9	7404.37	4713.33	7662.88	0.615086	0.182089	0.291909
M243T212	243.01813	211.6490	nodiff	L-fucose-1-phosphate	[M-H]-	0.999600794175239	HMDB0001265	C02985	Organic oxygen compounds	Organooxygen compounds	Carbohydrates and carbohydrate conjugates	1502.78	2574.56	2327.89	1585.61	3107.39	2111.88	2558.2	2411.29	1576.43	1274.47	2504.72	1973.28	2201.69	2049.73	1.07413	0.655594	0.0713668
M195T299	195.05037	298.6970	nodiff	L-gulono-1,4-lactone	[M+OH]-	0.975250634175497	HMDB0003466	C01040	Organoheterocyclic compounds	Lactones	Gamma butyrolactones	17880.1	26582.4	46416.1	21848.7	8478.65	22250.6	41657.8	47821.1	45726.2	19436.3	43981.4	50887.2	23909.4	41585	0.574953	0.0285416	0.860876
M182T201	182.01188	201.2460	nodiff	L-homocysteic acid	[M-H]-	0.992036100886769	HMDB0002205	C16511	Organic acids and derivatives	Carboxylic acids and derivatives	Amino acids, peptides, and analogues	2115.06	2332.86	2800.22	1935.33	2877.91	2015.79	3684.1	4192.25	2436.14	1157.88	4567.88	2891.56	2346.2	3154.97	0.743651	0.165068	0.19633
M181T290	181.07083	289.6170	nodiff	L-Iditol	(M-H)-	0.8875	HMDB0011632	C01507	Organic oxygen compounds	Organooxygen compounds	Carbohydrates and carbohydrate conjugates	108540	21580	14621.7	116466	12163.1	12238.6	40772	23949	19677.9	14057.4	29810.6	21487.2	47601.4	24959	1.90718	0.305051	0.504171
M133T489	133.01345	489.4910	nodiff	L-Malic acid	(M-H)-	0.8267	HMDB0000156	C00149	Organic acids and derivatives	Hydroxy acids and derivatives	Beta hydroxy acids and derivatives	13514.3	18794.7	17878.7	14209.7	3371	13427.8	18270.6	15774.2	8802.01	4219.35	18728.7	13369.4	13532.7	13194	1.02567	0.918605	0.0268611
M135T341	135.02944	340.6250	nodiff	L-Threonate	(M-H)-	0.8588	HMDB0000943/HMDB0062620	C01620	Organic oxygen compounds	Organooxygen compounds	Carbohydrates and carbohydrate conjugates	35414.2	33774.6	34475.7	66902.5	138331	33008.2	37438.7	40928.8	27932.9	21944.5	48213.7	31334.3	56984.3	34632.1	1.64542	0.231829	0.785495
M295T31	295.13550	30.6940	nodiff	Leonurine	[M-H-CH3]-	0.987982988325982		C16985	Benzenoids	Benzene and substituted derivatives	Benzoic acids and derivatives	5574.22	1169.88	4048.21	12049.4	4796.44	8241.63	9174.79	10408.4	3518.29	6578.79	44701	6363.49	5979.96	13457.5	0.44436	0.277306	0.414757
M244T176	244.15423	176.0840	nodiff	Leu-Gly-Gly	[M-H]-	0.869538084623026			Organic acids and derivatives	Carboxylic acids and derivatives	Amino acids, peptides, and analogues	9492.76	2971.51	5235.49	11107.2	1727.54	12398	6786.33	11178	3326.61	4783.64	5647.99	5024.94	7155.4	6124.58	1.16831	0.639022	0.101765
M337T108	337.23744	107.9910	nodiff	Leukotriene b3	[M-H]-	0.703580028666628			Lipids and lipid-like molecules	Fatty Acyls	Eicosanoids	20501.4	3488.88	14184.2	30140.7	17209.4	13509	1249.37	9300.36	7076.74	7308.77	7564.01	6777.19	16505.6	6546.07	2.52145	0.0243169	0.469299
M434T36	434.23467	35.6920	nodiff	Leukotriene e4 methyl ester	[M-H-H2O]-	0.790101719949072			Organic acids and derivatives	Carboxylic acids and derivatives	Amino acids, peptides, and analogues	27252.5	28269.9	63975.4	37416.3	27262.5	16583.4	13021.6	23996.8	7831.77	8311.21	17976.7	12924.5	33460	14010.4	2.38822	0.0212296	0.649591
M674T177	673.52893	177.0755	nodiff	Linoleoylglycine	[2M-H]-	0.957081162402916			Organic acids and derivatives	Carboxylic acids and derivatives	Amino acids, peptides, and analogues	105509	81065.8	108409	117648	81542.8	98159.4	163890	225277	123542	45257.2	171683	134338	98722.2	143998	0.685581	0.103271	1.30793
M453T213	453.10619	213.4515	nodiff	Liquiritin	[M+Cl]-	0.747150295107431	HMDB0029520	C16989	Phenylpropanoids and polyketides	Flavonoids	Flavonoid glycosides	1101.07	3651.44	8006.9	280.936	1814.72	2287.69	268.43	207.025	20.0914	1187.42	105.407	49.7477	2857.13	306.353	9.32624	0.0498589	0.237
M269T39	269.21182	39.3930	nodiff	Loxistatin acid	[M-H-CO2]-	0.954400655323276			Organic acids and derivatives	Carboxylic acids and derivatives	Amino acids, peptides, and analogues	85424.5	140341	59500.4	79079.6	73293.5	105090	52985.8	178603	274357	45923.1	59546.8	52731.6	90454.8	110691	0.817181	0.627433	0.716407
M213T186	213.01650	186.3340	nodiff	m-Chlorohippuric acid	M-	0.6623						247273	298660	176652	159673	94191.8	147515	198270	190096	113423	60921.4	176695	116611	187328	142669	1.31302	0.259364	0.668705
M133T413	133.01364	413.3940	nodiff	Malate	[M-H]-	0.914421947085909	HMDB0000156	C00149	Organic acids and derivatives	Hydroxy acids and derivatives	Beta hydroxy acids and derivatives	28722.1	48196.1	153772	141018	37894.8	34254.7	115969	103121	40864.8	5794.84	139895	48209.8	73976.3	75642.4	0.977975	0.958887	0.351528
M325T331	325.10415	331.4890	nodiff	Maltitol	[M-H-H2O]-	0.878221939510267	HMDB0002928		Lipids and lipid-like molecules	Fatty Acyls	Fatty acyl glycosides	2478.32	2205.71	2403.73	2568.96	2958.54	2518.53	1999.77	2179.71	1699.94	1750.38	2275.33	2056.72	2522.3	1993.64	1.26517	0.00332934	0.0940164
M410T379	410.09705	379.3640	nodiff	Mandipropamid	[M-H]-	0.944019905966343		C18522	Benzenoids	Benzene and substituted derivatives	Benzylethers	931.603	1088.3	1178.97	1029.36	1416.77	953.549	1781.94	2441.74	1133.35	573.886	1806.76	961.181	1099.76	1449.81	0.758553	0.252195	0.124207
M1024T192	1023.54384	191.9910	nodiff	Mclw	[M-H]-	0.912347140192849			Organic acids and derivatives	Peptidomimetics	Hybrid peptides	1329.4	1058.47	2956.12	1563.25	1187.78	48.8413	1385.36	554.471	1765.59	86.4515	330.608	1255.94	1357.31	896.404	1.51417	0.350567	0.0522902
M443T81	443.31415	80.5180	nodiff	Menaquinone 4	[M-H]-	0.928379154352704	HMDB0030017	C00828	Lipids and lipid-like molecules	Prenol lipids	Quinone and hydroquinone lipids	6805.2	2782.28	11352.9	5762.97	1585.68	3782.67	20113.3	19764	22991.1	11972.8	22467.6	33800.1	5345.29	21851.5	0.244619	0.000446168	0.847841
M275T32	275.16780	31.9130	nodiff	Menthyl salicylate	[M-H]-	0.917665432960794			Benzenoids	Benzene and substituted derivatives	Benzoic acids and derivatives	11932.3	6632.34	5305.71	5367.5	6943.73	2821.07	9696.3	6482.26	3029.8	2030.47	7059.1	4060.59	6500.44	5393.09	1.20533	0.530445	0.138619
M309T26	309.17377	26.4030	nodiff	Mestranol	[M-H]-	0.919625236235471	HMDB0015446	C07618	Lipids and lipid-like molecules	Steroids and steroid derivatives	Estrane steroids	42798.5	45766.7	39539.7	53334.9	41704.6	52570	42960.2	98971.1	32640.5	28328	118514	33291.5	45952.4	59117.5	0.777306	0.434979	0.633679
M191T36	191.07397	36.3055	nodiff	Metamizole	[M-H-C7H5NO]-	0.995481365991742			Organoheterocyclic compounds	Azoles	Pyrazoles	47588.9	10590.8	4272.18	18467.2	37919.3	5229.26	4451.88	3452.48	2559.46	3621.27	4214.56	4636.62	20677.9	3822.71	5.40924	0.0457513	0.611533
M356T61	356.15195	61.0175	nodiff	Methanone, (4-hydroxy-1-naphthalenyl)(1-pentyl-1h-indol-3-yl)-	[M-H]-	0.950426269188487			Organoheterocyclic compounds	Indoles and derivatives	Naphthoylindoles	2085.05	638.931	954.792	1702.2	2649.54	1849.36	5933.95	6625.47	4586.48	6218.68	11872.7	4955.51	1646.65	6698.79	0.245812	0.00114452	0.446865
M645T236	645.30254	236.0265	nodiff	Methanone, [1-(5-hydroxypentyl)-1h-indol-3-yl](4-hydroxyphenyl)-	[2M-H]-	0.972438324212496			Organoheterocyclic compounds	Indoles and derivatives	Benzoylindoles	2586.68	1802.12	2047.35	2455.84	1650.57	2161.49	2686.25	3036.74	1458.83	1040.34	2604.89	1908.44	2117.34	2122.58	0.997532	0.988397	0.0496663
M164T363	164.03774	362.8860	nodiff	Methionine sulfoxide	[M-H]-	0.701365044588057		C02989	Organic acids and derivatives	Carboxylic acids and derivatives	Amino acids, peptides, and analogues	18000	12691.8	18547.9	14353.6	14284.4	11807.9	12772.7	9073.72	8406.8	11576.9	14318.1	10369.9	14947.6	11086.4	1.34829	0.0239666	0.236472
M315T97	315.25332	96.8630	nodiff	Methyl hexadecanoate	[M+HCO2]-	0.946649668802163	HMDB0061859	C16995	Lipids and lipid-like molecules	Fatty Acyls	Fatty acid esters	53117.7	11553.8	16325.2	67106.8	5297.23	43569.9	18701.5	42400.9	22582.6	15234	27967.6	31515.7	32828.4	26400.4	1.24348	0.573891	0.244341
M117T375	117.01898	375.4880	nodiff	Methylmalonic acid	[M-H]-	0.999267800241789	HMDB0000202	C02170	Organic acids and derivatives	Carboxylic acids and derivatives	Dicarboxylic acids and derivatives	288367	403077	847283	271482	100775	322401	510461	676063	402299	119472	709523	475868	372231	482281	0.771814	0.434474	1.65456
M278T49_1	278.14263	48.9560	nodiff	Metolachlor oa	[M-H]-	0.881568250946275			Organic acids and derivatives	Carboxylic acids and derivatives	Amino acids, peptides, and analogues	10944.8	5641.54	5736.54	8352.59	3308.79	10167.5	4855.99	5060.59	1709.07	1783.32	21760.9	3002.12	7358.62	6362	1.15665	0.772839	0.126135
M295T106	295.15360	105.7290	nodiff	Mevalonic acid	[2M-H]-	0.919748418295347	HMDB0059629	C00418	Lipids and lipid-like molecules	Fatty Acyls	Fatty acids and conjugates	9534.81	30731.9	21062.2	6461.31	6871.07	18220.4	32214.9	55827.7	16275.5	30528.1	38346.4	22238	15480.3	32571.8	0.475267	0.0319651	0.724739
M443T296	443.19054	295.5415	nodiff	Mitoxantrone	[M-H]-	0.957957764216459	HMDB0015335	C11195	Benzenoids	Anthracenes	Anthraquinones	9430.93	8715.64	7800.23	10774.4	21612.4	5737.17	26286.7	48769.9	22881.4	13351	22994.1	18583.8	10678.5	25477.8	0.419128	0.0227176	0.762228
M397T185	397.22200	184.7985	nodiff	Mitragynine	[M-H]-	0.823910621513306	HMDB0041933	C09226				11717.9	5181.15	2599.87	12163.3	16368.6	4243.87	11302.8	12923	2488.65	2371.45	11646.5	9175.94	8712.44	8318.04	1.04742	0.896208	0.302964
M179T383	179.05547	383.2445	nodiff	Myo-inositol	[M-H]-	0.980590054031803	HMDB0000211	C00137	Organic oxygen compounds	Organooxygen compounds	Alcohols and polyols	132313	239962	138375	126806	475019	125436	119529	131834	96937.7	57677.9	138317	110098	206318	109066	1.89169	0.123926	1.65326
M619T36_1	618.58188	36.3000	nodiff	N-(1.3-dihydroxyoctadeca-4.14-dien-2-yl)docosanimidic acid	[M-H]-	0.831844454380254						3104.27	4977.54	6095.11	3786.14	5841.72	24563.4	7378.34	5877.1	1832.94	1508.78	1279.39	6298.53	8061.37	4029.18	2.00075	0.278842	0.279464
M642T177_2	642.48594	177.3950	nodiff	N-(dodecanoyl)-1-.beta.-glucosyl-sphing-4-enine	[M-H]-	0.968069119729392			Lipids and lipid-like molecules	Sphingolipids	Glycosphingolipids	11298.2	11884.9	12721.9	13139.8	11816.9	10794.1	10575.2	10539.8	5822.73	6717.44	10587.2	7479.9	11942.6	8620.38	1.38539	0.00628923	0.302672
M202T300	202.07130	299.7610	nodiff	N-Acetyl-D-glucosamine	(M-H2O-H)-	0.8958	HMDB0000215	C00140	Organic oxygen compounds	Organooxygen compounds	Carbohydrates and carbohydrate conjugates	3061.54	4746.79	12892.9	3695.88	18164.2	5525.51	8969.56	4943.3	1793.34	1219.56	10002.2	3404.95	8014.46	5055.49	1.5853	0.333848	0.30105
M300T166	300.03843	166.2920	nodiff	N-Acetyl-D-Glucosamine 6-Phosphate	[M-H]-	0.748286211122531	HMDB0001367	C04256	Organic oxygen compounds	Organooxygen compounds	Carbohydrates and carbohydrate conjugates	306618	165512	273994	145845	725655	307118	265908	269561	135904	66335.7	240629	139255	320790	186265	1.72222	0.176427	2.05139
M174T381	174.03981	381.2650	nodiff	N-acetyl-l-aspartic acid	[M-H]-	0.851666209639491	HMDB0000812	C01042	Organic acids and derivatives	Carboxylic acids and derivatives	Amino acids, peptides, and analogues	6333.88	5972.93	7111.16	5567.45	4933.29	8006.29	9988.61	12032.6	6618.06	5867.64	16903.7	8383.46	6320.83	9965.67	0.63426	0.0604048	0.369327
M190T193	190.05350	193.4335	nodiff	N-acetyl-l-methionine	[M-H]-	0.97804736985703	HMDB0011745	C02712	Organic acids and derivatives	Carboxylic acids and derivatives	Amino acids, peptides, and analogues	29308.1	36510.4	35067.7	39993.8	27962	27634	34739.2	30289.7	19126.9	11817.5	52722.6	27276.2	32746	29328.7	1.11652	0.589144	0.234609
M285T429	285.07256	429.3765	nodiff	N-acetylaspartylglutamic acid	[M-H-H2O]-	0.888980798585169	HMDB0001067	C12270	Organic acids and derivatives	Carboxylic acids and derivatives	Amino acids, peptides, and analogues	2693.67	1637.05	2460.38	3025.78	2320.11	1490.01	2152.1	2348.06	1211.04	1271.77	2364.61	1308.64	2271.17	1776.04	1.27878	0.172423	0.0735577
M284T165	284.08830	164.9945	nodiff	N-acetylcytidine	[M-H]-	0.969597781356683						32671.8	43718	8696.35	24126.6	57088	24218.1	14066.2	13734.9	6792.4	5729.71	14746.2	11816.1	31753.1	11147.6	2.84843	0.0156977	0.834274
M300T431	300.04856	431.2730	nodiff	N-Acetylglucosamine 1-phosphate	[M-H]-	0.989409785468789	HMDB0001367	C04256	Organic oxygen compounds	Organooxygen compounds	Carbohydrates and carbohydrate conjugates	4816.19	2428.42	2918.39	3086.5	4155.63	2448.04	4890.77	3047.27	2732.65	2673.86	3611.45	3819.97	3308.86	3462.66	0.955584	0.77496	0.0808845
M146T291	146.04510	290.6500	nodiff	N-acetylserine	[M-H]-	0.855223783288122	HMDB0002931		Organic acids and derivatives	Carboxylic acids and derivatives	Amino acids, peptides, and analogues	21542.1	29622.3	33789.7	30202.2	31993.9	18774.8	22589.5	27567.8	13696.2	12980.5	32997.7	18911	27654.2	21457.1	1.28881	0.157493	0.330111
M245T187	245.09285	187.1480	nodiff	N-acetyltryptophan	[M-H]-	0.962839003698739			Organic acids and derivatives	Carboxylic acids and derivatives	Amino acids, peptides, and analogues	64359.9	35942.9	41012	59781.7	24868.8	41448.7	44378.5	53919.9	3388.27	1518.02	65600.6	12106.6	44569	30152	1.47814	0.289935	0.578849
M187T381	187.10820	381.4060	nodiff	N-alpha-acetyl-l-lysine	[M-H]-	0.999741835487021		C12989	Organic acids and derivatives	Carboxylic acids and derivatives	Amino acids, peptides, and analogues	6668.1	5427.29	6536.87	7204.2	11469.8	4210.34	12172.5	6853.27	4874.52	3650.95	9206.13	4995.28	6919.43	6958.78	0.994345	0.981471	0.194594
M438T199	438.29770	198.7145	nodiff	N-arachidonoyldopamine	[M-H]-	0.871369416911914			Benzenoids	Phenols	Benzenediols	8206.38	6194.67	8564.84	5852.24	6370.97	6269.2	13952.4	17029.4	8407.76	4650.68	12138.8	8910.41	6909.72	10848.2	0.636943	0.0608909	0.400405
M621T37	620.59686	36.9650	nodiff	N-behenoyl-d-erythro-sphingosine	[M-H]-	0.898292351140363	HMDB0004952		Lipids and lipid-like molecules	Sphingolipids	Ceramides	3034.35	9181	4771.96	6693.96	4361.93	31825.4	5377.09	2731.33	278.386	835.071	428.028	4263.91	9978.1	2318.97	4.30282	0.122621	0.447082
M446T35	446.33095	34.6360	nodiff	N-docosanoyltaurine	[M-H]-	0.981237873785379			Lipids and lipid-like molecules	Fatty Acyls	Fatty amides	34416.7	19886	34455.9	39715.6	31896.9	10911.5	18903.1	28795.4	5782.8	4685.33	14013.4	7709.5	28547.1	13314.9	2.14399	0.0262432	0.622136
M131T295_2	131.03465	295.1915	nodiff	N-nitroso-n-methyl-3-aminopropionic acid	[M-H]-	0.816476594655266			Organic nitrogen compounds	Organonitrogen compounds	Organic nitroso compounds	15863.7	11893.1	17870.4	10645	4234.83	10932.6	20320.3	18259.5	7048.17	7179.41	18184.4	18164.2	11906.6	14859.3	0.801289	0.369344	0.268749
M504T49	504.32331	49.2890	nodiff	N-octanoylsphingosine-1-phosphate	[M-H]-	0.771921424623996			Lipids and lipid-like molecules	Sphingolipids	Phosphosphingolipids	669.017	1615.29	4725.56	13923.6	2341.63	1747.88	129.849	274.282	161.463	90.0785	181.981	68.6498	4170.5	151.051	27.61	0.075703	0.305401
M338T110	338.26860	109.8650	nodiff	N-oleoyl-l-serine	[M-H-CH2O]-	0.926746382603205			Organic acids and derivatives	Carboxylic acids and derivatives	Amino acids, peptides, and analogues	6767.63	3595.23	10389.2	6239.33	225.75	2075.99	3116.19	14861.2	8482.4	5143.18	4400.76	8635.55	4882.19	7439.88	0.656219	0.290751	0.320662
M428T61	428.31860	61.3390	nodiff	N-oleoyl-phenylalanine	[M-H]-	0.741321972587032	HMDB0062336		Organic acids and derivatives	Carboxylic acids and derivatives	Amino acids, peptides, and analogues	4630.47	4435.3	2268.37	7335.26	2506.46	8952.53	2244.73	2293.7	2654.6	3186.73	3595.76	2910.2	5021.4	2814.29	1.78425	0.0735643	0.235287
M618T35	618.47697	35.0730	nodiff	N-palmitoyl-d-erythro-dihydroceramide-1-phosphate	[M-H]-	0.960626860289973	HMDB0010698		Lipids and lipid-like molecules	Sphingolipids	Phosphosphingolipids	127191	173276	545781	393874	110111	224138	279908	247844	59483.9	27511.7	127089	206999	262395	158139	1.65927	0.232112	1.18325
M565T36	564.53663	36.3000	nodiff	N-Stearoylsphingosine (Ceramide C18)	[M-H]-	0.954901169083056	HMDB0004950					12235.4	33659	30533.5	24212.1	11930.2	97912	13236.8	21381	9015.29	1759.38	6268.65	11321.2	35080.4	10497.1	3.34192	0.0959869	0.794568
M647T37	646.61372	36.9285	nodiff	N-tetracosenoyl-4-sphingenine	[M-H]-	0.881972372591926	HMDB0004953		Lipids and lipid-like molecules	Sphingolipids	Ceramides	13156.1	37076.5	29344.7	17695.3	8872.68	114094	7493.98	7468.17	1296.32	1985.22	2022.5	6186.13	36706.6	4408.72	8.3259	0.0726628	0.944579
M187T472	187.10822	471.8040	nodiff	N6-Acetyl-L-lysine	(M-H)-	0.9379	HMDB0000206	C02727				4248.49	5591.08	9579.8	4001.59	3019.14	5546.35	7592.56	5017.1	2040.8	1685.12	11353.4	4749.55	5331.07	5406.43	0.986061	0.966587	0.0870752
M247T34	247.16958	33.8385	nodiff	Nabilone	[M-H-C8H12O]-	0.963479399286069	HMDB0014629		Organoheterocyclic compounds	Naphthopyrans	Naphthopyranones	23235.3	21603.8	21929.7	22590.7	16340.8	21177.5	19590.3	20322.6	13464.7	8510.96	19165.2	15554.5	21146.3	16101.4	1.31332	0.0385035	0.318406
M271T418	271.05608	418.2890	nodiff	Naringenin	[M-H]-	0.777073678221705	HMDB0128074	C00509	Phenylpropanoids and polyketides	Flavonoids	Flavans	8026.96	11285	11697	12253.1	10310.2	12460.5	12178.7	10503.6	7476.26	4359.22	11254.5	11571.3	11005.5	9557.27	1.15153	0.328568	0.116753
M249T62	249.14901	61.9230	nodiff	NCGC00169093-01	[M-H]-	0.769047496140317			Lipids and lipid-like molecules	Prenol lipids	Sesquiterpenoids	21079.1	26645.4	27374.5	74001.3	14315.2	60258	17971.6	117859	35177.8	19785.5	79568.5	14890.4	37278.9	47542.1	0.784124	0.614754	0.34317
M365T41	365.34193	40.6230	nodiff	Nervonic acid	[M-H]-	0.995575493752955	HMDB0002368	C08323	Lipids and lipid-like molecules	Fatty Acyls	Fatty acids and conjugates	66011.9	73596.9	70968.2	92992.5	63574.1	76650.3	63134.8	57841.6	101142	58705	35911.5	33670.1	73965.7	58400.9	1.26652	0.18109	0.605525
M237T25	237.02209	25.2820	nodiff	Nitrofurantoin	(M-H)-	0.6398						6450	3490.53	4987.93	5117.08	6534.5	1574.25	3316.79	6908.53	7927.42	2291.77	2538.55	5637.06	4692.38	4770.02	0.983724	0.951476	0.0971574
M297T81	297.24279	81.2315	nodiff	Nname,cis-9,10-Epoxystearic acid	(M-H)-	0.9314						40650.9	24115.9	26804.5	33100.8	12974.7	144827	28292.3	50455.5	22400.2	13806.5	38002.1	24355.1	47079	29552	1.59309	0.414741	0.512237
M599T239	599.31988	239.1605	nodiff	Nocardamine	[M-H]-	0.95711474946506						63372.9	43596.2	55510.1	72605.8	48544.8	54014	87632.5	103124	36332.4	23098.7	81151.3	47554.3	56274	63148.9	0.891132	0.626673	0.531566
M932T187	931.52137	186.9220	nodiff	Notoginsenoside r1	[M-H]-	0.835783262762607		C08961	Lipids and lipid-like molecules	Prenol lipids	Triterpenoids	7145.47	11157.5	8928.23	8190.15	8278.65	11669.9	21015.4	10553.1	1641.32	1201.32	8942.42	5006.91	9228.31	8060.09	1.14494	0.714251	0.231655
M194T268	194.06644	268.2770	nodiff	O-acetylsalicylhydroxamic acid	[M-H]-	0.845662301244711			Benzenoids	Benzene and substituted derivatives	Benzoic acids and derivatives	2748.3	2074.83	1873.72	1840.25	729.367	2345.92	3001.39	2717.37	1656.55	2189.88	3755.08	1917.43	1935.4	2539.62	0.762082	0.182145	0.13419
M309T30_2	309.15214	30.1810	nodiff	O-desmethylquinidine	[M-H]-	0.995230652820752						10623.7	8628.79	17482.7	23998.8	19920.9	15246.1	14721.6	19184.4	9596.12	14679.8	68246.6	13631.2	15983.5	23343.3	0.684715	0.450204	0.421701
M153T380_2	153.02804	380.1390	nodiff	O,o-diethyl phosphate	[M-H]-	0.998831006795909	HMDB0012209	C06608	Organic acids and derivatives	Organic phosphoric acids and derivatives	Phosphate esters	20122.3	20899.9	13810.9	11746.3	20892	17835	7985.15	47944.7	31754.8	28856.9	15946	30049.6	17551.1	27089.5	0.647891	0.135368	0.584497
M283T70	283.26343	70.3710	nodiff	Octadecanoic acid	[M-H]-	0.998160294705828	HMDB0000827	C01530	Lipids and lipid-like molecules	Fatty Acyls	Fatty acids and conjugates	311014	252594	240510	249660	154832	301383	242707	88870.6	288344	276956	266117	308555	251666	245258	1.02613	0.874973	1.39982
M281T31_2	281.12150	30.7810	nodiff	Octyl gallate	[M-H]-	0.982903715455292	HMDB0033375		Benzenoids	Benzene and substituted derivatives	Benzoic acids and derivatives	3612.39	1222.56	2502.36	4889.23	1064.83	2227.57	3479.22	4867.43	2004.74	2404.05	18674.2	3301.26	2586.49	5788.48	0.446834	0.259094	0.278223
M360T60	360.14775	59.8450	nodiff	Ofloxacin	[M-H]-	0.974635895773827	HMDB0015296	C07321	Organoheterocyclic compounds	Quinolines and derivatives	Quinoline carboxylic acids	5390.77	3852.47	3365.93	5085.48	6954.64	3306.71	21922.2	13818.9	11884.2	12205.9	15767.9	11406.6	4659.33	14501	0.321312	0.000194331	0.624836
M803T197	803.43487	196.8460	nodiff	Okadaic acid	[M-H]-	0.945034005093126		C01945	Organic oxygen compounds	Organooxygen compounds	Ethers	1145.2	1292.11	1375.7	1444.99	1155.11	1436.5	1818.88	1566.92	148.076	141.296	1483.28	834.875	1308.27	998.888	1.30973	0.33557	0.103043
M281T107_3	281.24764	106.7310	nodiff	Oleic acid	[M-H]-	0.998648514815299	HMDB0000207	C00712	Lipids and lipid-like molecules	Fatty Acyls	Fatty acids and conjugates	216069	161345	157513	220771	116258	191067	175648	274004	132061	78292.3	210197	122167	177170	165395	1.0712	0.727669	0.239153
M155T222	155.00952	222.0870	nodiff	Orotate	[M-H]-	0.934007097237077	HMDB0000226	C00295	Organoheterocyclic compounds	Diazines	Pyrimidines and pyrimidine derivatives	28411.9	19467.8	23897.2	27195.9	25386.8	15969.3	3688.81	4648.71	4597.94	4256.05	4384.59	4862.91	23388.1	4406.5	5.30764	2.13024e-06	0.829454
M287T299	287.05133	299.2340	nodiff	Orotidine	[M-H]-	0.99439353040976	HMDB0000788	C01103	Organoheterocyclic compounds_Nucleosides nucleotides and analogues	Diazines/Pyrimidine nucleosides	Pyrimidines and pyrimidine derivatives	13749.9	17072.4	15158	10607.4	21883.4	9691.52	20962.4	28637	14516.7	7014.65	26044.2	17942.3	14693.8	19186.2	0.765852	0.252837	0.482684
M297T29	297.15253	29.1705	nodiff	Ostruthin	[M-H]-	0.906219727701422		C09281	Lipids and lipid-like molecules	Prenol lipids	Terpene lactones	293217	176558	221446	387727	163787	350356	322238	506102	158350	302350	2.11143e+06	303135	265515	617267	0.430146	0.275025	2.85656
M107T107	107.04964	106.6295	nodiff	p-Cresol	(M-H)-	0.8728						17525.5	14771.5	14241.4	26343.9	43003.8	5234.59	6590.2	8058.12	6241.9	6817.04	7531.9	6007.86	20186.8	6874.5	2.93647	0.0319451	0.587129
M218T265	218.10274	265.4795	nodiff	Pantothenate	[M-H]-	0.962687534556161	HMDB0000210	C00864	Organic oxygen compounds	Organooxygen compounds	Alcohols and polyols	65980.4	67647.6	81607.6	80674.3	190094	65971.5	108211	106116	56183	26447.4	128397	77578.1	91995.9	83822.2	1.09751	0.751905	0.963275
M204T77	204.12353	76.8755	nodiff	Pantothenol	[M-H]-	0.873921609978944	HMDB0004231	C05944	Lipids and lipid-like molecules	Fatty Acyls	Fatty amides	13325.4	9004.05	12748.7	17521.4	12768.5	11075.4	9846.37	25479.7	13876.6	5446.09	26651	8065.64	12740.6	14894.2	0.855403	0.591447	0.272416
M863T139_1	862.55571	138.6410	nodiff	Pc 38:7	[M+CH3COOH-H]-	0.830696873880903			Lipids and lipid-like molecules	Glycerophospholipids	Glycerophosphocholines	14319.5	15763.5	10795.8	16039.2	12241.4	14680.4	15859.8	13084.1	13585.5	11019.5	11949.9	13144.3	13973.3	13107.2	1.06608	0.439312	0.14344
M891T137	890.59175	137.4130	nodiff	Pc 40:7	[M+CH3COOH-H]-	0.871928146394012			Lipids and lipid-like molecules	Glycerophospholipids	Glycerophosphocholines	13670.1	22107.7	26621.7	19696.8	22086.5	42718.4	25380.2	29789.8	24597	20847.3	31120.7	20235.8	24483.5	25328.5	0.96664	0.852497	0.154459
M889T137	888.57637	136.8530	nodiff	Pc 40:8	[M+CH3COOH-H]-	0.766958380127203			Lipids and lipid-like molecules	Glycerophospholipids	Glycerophosphocholines	8542.83	7029.16	8148.31	7913.04	7421.85	12555	7964.32	7693.9	11384.6	8328.29	10559.6	7962.31	8601.7	8982.17	0.957641	0.722722	0.204838
M865T139	864.57650	138.9620	nodiff	Pc(16:1e/17-hdohe)	[M+Hac-H]-	0.933891486411321			Lipids and lipid-like molecules	Glycerophospholipids	Glycerophosphocholines	151623	182206	314531	220540	186175	262457	201023	206396	192765	151631	224946	225785	219589	200424	1.09562	0.492469	0.597312
M839T140	838.55742	140.4300	nodiff	Pc(16:1e/8,9-epete)	[M+Hac-H]-	0.848230065713744			Lipids and lipid-like molecules	Glycerophospholipids	Glycerophosphocholines	22118.7	15363.1	14153.5	18061.3	22244.9	14541.3	17311.6	22270.3	21817.6	22219.3	20181.9	17636.6	17747.1	20239.5	0.876854	0.189866	0.352506
M712T144	712.49304	144.4545	nodiff	Pe 34:3	[M-H]-	0.776426483555493			Lipids and lipid-like molecules	Glycerophospholipids	Glycerophosphoethanolamines	19289.6	24750.9	31670.8	32024.5	15265.1	15115.2	23384.2	30187.6	22503.7	18834.1	35935.9	22027.4	23019.3	25478.8	0.903469	0.558848	0.331584
M776T40	776.49896	40.3550	nodiff	Pe 39:6	[M-H]-	0.730338924582079			Lipids and lipid-like molecules	Glycerophospholipids	Glycerophosphoethanolamines	22218.3	15959	17390.7	13283.6	5490.79	22627.1	38545.7	48025.8	18397.4	28273.3	22882.2	18529	16161.6	29108.9	0.55521	0.0410515	0.623848
M817T63	816.55488	63.4150	nodiff	Pe 42:7	[M-H]-	0.811340922654813			Lipids and lipid-like molecules	Glycerophospholipids	Glycerophosphoethanolamines	45275.2	43366.5	86645.5	54401.9	58093.4	143254	51279.7	78862.6	1456.25	1461.01	35351	4008.61	71839.4	28736.5	2.49993	0.0608161	1.11049
M779T39	778.52656	38.7930	nodiff	Pe(16:0/19,20-epdpe)	[M-H]-	0.944109779841423			Lipids and lipid-like molecules	Glycerophospholipids	Glycerophosphoethanolamines	33700.6	26128.1	41712.4	30529.6	14810.5	17601.9	35442	30110.6	16914.8	34198.8	23307.2	23173.7	27413.8	27191.2	1.00819	0.965877	0.371776
M763T142	762.50954	141.6195	nodiff	Pe(16:1e/14-hdohe)	[M-H]-	0.706802216213589			Lipids and lipid-like molecules	Glycerophospholipids	Glycerophosphoethanolamines	581567	794928	3.20589e+06	851001	530513	689202	1.57634e+06	1.44972e+06	959101	1.05445e+06	2.12832e+06	1.65184e+06	1.10885e+06	1.46996e+06	0.75434	0.447673	3.3581
M781T180	780.51895	179.8590	nodiff	Pe(18:0/18-hepe)	[M-H]-	0.756167502708757			Lipids and lipid-like molecules	Glycerophospholipids	Glycerophosphoethanolamines	3722.1	4622.89	15848.9	4446.15	3231.04	5089.73	9271.71	9247	3553.03	1628.04	12607.8	5897.05	6160.14	7034.1	0.875753	0.741033	0.134475
M793T177	792.57947	176.7555	nodiff	Pe(18:0e/10-hdohe)	[M-H]-	0.756776192248727			Lipids and lipid-like molecules	Glycerophospholipids	Glycerophosphoethanolamines	7470.68	12952.2	19669.9	9054.17	7875.77	7978.86	26627	23217.1	11191.2	2951.7	14630.7	9776.48	10833.6	14732.4	0.73536	0.363611	0.301998
M781T54	780.54218	54.1050	nodiff	Pe(18:1/12-hete)	[M-H]-	0.791767257978328			Lipids and lipid-like molecules	Glycerophospholipids	Glycerophosphoethanolamines	32915	53843.4	32853.7	34954.5	28956.3	24401	24439.2	22445.9	23478.8	50025.8	49689.3	19734.6	34654	31635.6	1.09541	0.68058	0.309253
M805T179	804.51992	178.8135	nodiff	Pe(18:1/14-hdohe)	[M-H]-	0.781791658185107			Lipids and lipid-like molecules	Glycerophospholipids	Glycerophosphoethanolamines	5358.68	4245.67	25834.7	6222.66	3480.72	4309.55	28289.7	16316.1	6465.31	2597.9	25976.8	12580.3	8241.99	15371	0.536203	0.223793	0.424015
M789T40	788.52394	39.9880	nodiff	Pe(18:2e/7-hdohe)	[M-H]-	0.85971221458704			Lipids and lipid-like molecules	Glycerophospholipids	Glycerophosphoethanolamines	15971.6	16609.9	38901.3	18395.5	12652.9	16012.7	39041.4	40642.7	9093.79	9055.58	20188.6	24222.7	19757.3	23707.5	0.83338	0.578535	0.265777
M1176T32	1175.77687	31.9940	nodiff	Pentaerythritol tetrakis(3,5-di-tert-butyl-4-hydroxyhydrocinnamate)	[M-H]-	0.928264591636808			Organic acids and derivatives	Carboxylic acids and derivatives	Tetracarboxylic acids and derivatives	591.668	846.57	871.666	856.514	1135.26	7470.9	984.886	1094.1	753.983	343.614	1057.9	603.408	1962.1	806.316	2.43341	0.322515	0.146103
M499T23	498.92957	23.4370	nodiff	Perfluorooctylsulfonic acid	[M-H]-	0.998359761232688	HMDB0059586	C18142	Organohalogen compounds	Alkyl halides	Alkyl fluorides	1537.63	1059.62	1445.19	1557.54	658.618	1494.84	2953.87	5013.57	1772.63	1351.51	3725.16	2713.87	1292.24	2921.77	0.44228	0.0159582	0.250806
M211T322	211.08149	321.5645	nodiff	Perseitol	[M-H]-	0.776929478104831	HMDB0033750	C08255	Organic oxygen compounds	Organooxygen compounds	Carbohydrates and carbohydrate conjugates	3827.87	2670.06	3253.38	2642.52	2745.66	2587.13	3482.09	2770.2	1990.19	2271.78	3336.18	2561.08	2954.44	2735.25	1.08013	0.49903	0.0247644
M818T38	817.50241	37.5130	nodiff	Pg 40:8	[M-H]-	0.78895394356272			Lipids and lipid-like molecules	Glycerophospholipids	Glycerophosphoglycerols	9194.82	13840.9	37022.5	10091	11740.1	7062	9006.82	5489.41	6329.24	3553.91	9739.15	6396.64	14825.2	6752.53	2.19551	0.111989	0.334057
M842T37	841.50251	36.6155	nodiff	Pg 42:10	[M-H]-	0.823778655726765						9157.79	10002.3	33809.1	9137.36	10772	5691.82	7261.28	9337.14	4849.54	2085.35	3094.48	3789.57	13095.1	5069.56	2.58308	0.094788	0.351003
M868T184	867.54155	183.7830	nodiff	Pg 44:11	[M-H]-	0.794373228221126						17988.6	16494.8	22888.6	24586.8	13708.2	21155.3	31004	24554.2	9339.95	5364.76	25194.7	28836.5	19470.4	20715.7	0.939885	0.795503	0.189213
M351T108	351.21623	107.5730	nodiff	PGF3a	(M-H)-	0.6743						15792.3	9669.04	5561.82	14172.4	24623.8	6914.65	7842.33	10658.8	4934.41	3755.57	6394.25	5744.18	12789	6554.93	1.95105	0.0673756	0.422066
M597T176	597.30433	175.8400	nodiff	Phe-met-arg-phe-amide	[M-H]-	0.901962079564925			Organic acids and derivatives	Carboxylic acids and derivatives	Amino acids, peptides, and analogues	196641	153098	150674	229162	219948	163774	221885	229842	101053	72368.5	200231	114210	185549	156598	1.18488	0.377304	0.99564
M192T185	192.06564	185.3015	nodiff	Phenaceturic acid	[M-H]-	0.999945164112588	HMDB0000821	C05598	Organic acids and derivatives	Carboxylic acids and derivatives	Amino acids, peptides, and analogues	39001.8	49974.2	43586.9	59066.5	310401	28089.1	17947	23263.5	16223.8	24948.9	25153.5	11313.1	88353.3	19808.3	4.46041	0.155923	1.34503
M331T582	331.26640	582.2185	nodiff	Phenol, 5-(1,1-dimethyloctyl)-2-[(1s,3s)-3-hydroxycyclohexyl]-	[M-H]-	0.885183739842425			Benzenoids	Benzene and substituted derivatives	Cyclohexylphenols	1816.68	2256.03	2075.73	2771.7	1990.36	1965.99	2232.4	2030.23	1947.38	1775.88	1802.81	2485.29	2146.08	2045.66	1.04909	0.583699	0.0664203
M165T111	165.05505	111.0300	nodiff	Phenyllactic acid	[M-H]-	0.774910672618656	HMDB0000779	C01479	Phenylpropanoids and polyketides	Phenylpropanoic acids		33636.8	12825.3	8796.09	35813.9	44776.7	7835.6	4313.11	5548.93	2928.58	3183.1	6793.26	4151.75	23947.4	4486.46	5.3377	0.0141587	0.753315
M540T194_2	540.36587	194.1460	nodiff	Phosphatidylcholine lyso alkyl 16:0	[M+CH3COO]-	0.984082240659988			Lipids and lipid-like molecules	Glycerophospholipids	Glycerophosphocholines	24293.6	19563.8	30189.1	28028.6	37187.5	24605.6	38289.1	44914.9	24082.4	14278.1	40976.1	27675.4	27311.4	31702.7	0.861485	0.432431	0.510081
M683T218	683.34064	217.5820	nodiff	Phosphonic acid, p-[(3r)-3-amino-4-[(3-hexylphenyl)amino]-4-oxobutyl]-	[2M-H]-	0.836790160014672			Organic acids and derivatives	Carboxylic acids and derivatives	Amino acids, peptides, and analogues	1055.61	1221.92	1331.71	849.964	887.456	898.751	878.727	1000.36	275.995	213.856	1045.95	785.979	1040.9	700.145	1.4867	0.0722996	0.0868751
M834T190	833.52079	190.1970	nodiff	Pi 34:2	[M-H]-	0.971972902940008			Lipids and lipid-like molecules	Glycerophospholipids	Glycerophosphoinositols	685103	456082	493286	722330	505074	378619	674958	651660	158126	123659	761378	404609	540082	462398	1.168	0.549483	1.62912
M864T588	863.56243	588.0550	nodiff	Pi 36:1	[M-H]-	0.906275496030126			Lipids and lipid-like molecules	Glycerophospholipids	Glycerophosphoinositols	1257.07	520.28	868.225	1116.34	966.333	945.166	1072.76	909.982	124.907	823.842	1353.35	732.097	945.569	836.158	1.13085	0.590048	0.0236455
M862T587_1	861.54920	586.6960	nodiff	Pi 36:2	[M-H]-	0.926548511060853			Lipids and lipid-like molecules	Glycerophospholipids	Glycerophosphoinositols	2614.19	1805.14	1800.11	2702	1891.54	1829.43	2766.5	2017.56	2954.08	2200.45	2564.03	1592.41	2107.07	2349.17	0.896942	0.393466	0.113618
M858T187	857.52106	187.2120	nodiff	Pi 36:4	[M-H]-	0.885110679716129			Lipids and lipid-like molecules	Glycerophospholipids	Glycerophosphoinositols	2.15859e+06	1.70437e+06	2.35988e+06	1.90193e+06	1.60058e+06	1.43342e+06	2.34478e+06	2.52377e+06	572575	341376	2.34212e+06	760204	1.85979e+06	1.4808e+06	1.25594	0.410192	3.13157
M872T187	871.53508	187.1510	nodiff	Pi 37:4	[M-H]-	0.959687908680802						103296	90001.1	100960	79722.1	59439.3	78786.5	111981	126652	22668.1	13778.1	82390.4	33689.7	85367.5	65193.2	1.30945	0.356035	0.671855
M884T186	883.53627	185.9410	nodiff	Pi 38:5	[M-H]-	0.962180552572431			Lipids and lipid-like molecules	Glycerophospholipids	Glycerophosphoinositols	1.13494e+06	963317	975251	1.12124e+06	651165	1.06028e+06	943725	1.10706e+06	201932	123913	1.2985e+06	588788	984367	710652	1.38516	0.223365	2.56299
M908T109	907.53570	108.8270	nodiff	Pi 40:7	[M-H]-	0.938906342683582			Lipids and lipid-like molecules	Glycerophospholipids	Glycerophosphoinositols	28700.7	43083.3	22378.6	37279.4	40326.1	25284.9	24046.4	15761.7	10271.2	26348.8	20567.7	41364.8	32842.2	23060.1	1.4242	0.110156	0.346525
M906T184	905.52097	183.5740	nodiff	Pi 40:8	[M-H]-	0.885053433461961						3300.09	1973	4394.46	3589.13	2035.35	3793.84	7834.73	9556.26	3758.96	785.691	9763.45	5732.69	3180.98	6238.63	0.509884	0.067817	0.326069
M850T166	849.51640	165.6885	nodiff	Pi(16:0/9-hode)	[M-H]-	0.777180566674368			Lipids and lipid-like molecules	Glycerophospholipids	Glycerophosphoinositols	23020.2	20248.1	10962.5	25663.1	22119.7	12114.5	21344.5	18709.9	8659.41	14444.6	19911.5	14245.7	19021.3	16219.3	1.17276	0.391894	0.158095
M902T162	901.54603	161.5240	nodiff	Pi(18:0/12-hete)	[M-H]-	0.911922191716969			Lipids and lipid-like molecules	Glycerophospholipids	Glycerophosphoinositols	179923	224025	163677	213350	199316	263260	157082	299105	82746.2	85539	142271	289251	207258	175999	1.17761	0.472203	0.5453
M878T165	877.54558	165.0910	nodiff	Pi(18:0/9-hode)	[M-H]-	0.799602721651695			Lipids and lipid-like molecules	Glycerophospholipids	Glycerophosphoinositols	33601	24268.4	19131.1	37312.7	19851.3	16323.3	26065.1	20791.8	7589.78	16844.9	26320.4	14802.4	25081.3	18735.7	1.33869	0.19333	0.273331
M924T108	923.53440	108.2050	nodiff	Pi(18:1/20-hdohe)	[M-H]-	0.753593068018251			Lipids and lipid-like molecules	Glycerophospholipids	Glycerophosphoinositols	4957.57	4597.8	3414.74	4973.98	6319.25	4572.93	2395.09	2733.02	2020.85	2579.66	1708.81	3296.52	4806.05	2455.66	1.95713	0.000352998	0.26868
M358T80	358.16862	80.1770	nodiff	Pitavastatin	[M-H-CH2O3]-	0.973722665086923	HMDB0041991	C13334	Organoheterocyclic compounds	Quinolines and derivatives	Phenylquinolines	5596.5	5528.23	5238.43	10152.1	7261.46	3961.98	4486.47	6199.75	4151.79	3764.95	3309.19	5792.95	6289.78	4617.52	1.36216	0.125443	0.140216
M769T479	769.23776	479.0470	nodiff	Poliumoside	[M-H]-	0.915981160005159			Organic oxygen compounds	Organooxygen compounds	Carbohydrates and carbohydrate conjugates	1488.63	1525.94	1987.75	1268.28	2798.91	1156	3922.88	3439.24	2131.89	1436.51	3535.29	2747.53	1704.25	2868.89	0.594046	0.0296709	0.228761
M487T162	487.30403	162.3125	nodiff	Polygalic acid	[M-H]-	0.952556686854349			Lipids and lipid-like molecules	Steroids and steroid derivatives	Hydroxysteroids	6436.62	4320.1	5412.07	13523.5	3721.49	4174.56	16220	23944.9	20268.5	10824.7	14455.4	18826.8	6264.73	17423.4	0.359558	0.000940065	0.685519
M1014T194	1013.55293	194.1360	nodiff	Polyphyllin e	[M-H]-	0.964589163252652			Lipids and lipid-like molecules	Steroids and steroid derivatives	Steroidal glycosides	3974	240.782	1352.54	4973.77	1658.59	2509.38	269.649	797.748	1579.92	28.5914	313.168	218.262	2451.51	534.556	4.58607	0.0292012	0.214434
M737T205	737.38907	204.8990	nodiff	Polyphyllin vi	[M-H]-	0.839989845398432			Lipids and lipid-like molecules	Steroids and steroid derivatives	Steroidal glycosides	3065.43	3439.85	3795.75	2790.24	2745.85	3446.15	7111.96	3782.35	982.715	528.813	3917.05	2730.75	3213.88	3175.61	1.01205	0.969865	0.113998
M423T28	423.25221	27.7470	nodiff	Pravastatin	[M-H]-	0.985116553079566	HMDB0005022	C01844	Organic acids and derivatives	Hydroxy acids and derivatives	Medium-chain hydroxy acids and derivatives	2748.56	2668.98	3101.09	4786.54	3713.7	3080.2	1049.29	1660.83	545.05	712.394	1241.77	1670.74	3349.84	1146.68	2.92134	0.000163001	0.282301
M395T182_2	395.20630	181.7705	nodiff	Pregnenolone sulfate	[M-H]-	0.797452059222463	HMDB0060382	C18044	Lipids and lipid-like molecules	Steroids and steroid derivatives	Sulfated steroids	13507	2218.28	835.148	6677.41	15056.4	3752.19	33242.6	40990.7	9432.15	6004.4	48081.9	24088.5	7007.74	26973.4	0.259802	0.0215429	0.896605
M463T27	463.28759	27.0130	nodiff	Pristimerin	[M-H]-	0.927795448476229		C08633	Lipids and lipid-like molecules	Prenol lipids	Triterpenoids	78566.1	84611.9	83531.7	107576	31455.2	138750	107334	100210	47930.9	30588.2	57234.7	70691.2	87415	68998.2	1.26692	0.354159	0.511048
M501T111	501.31774	110.6390	nodiff	Propanoic acid, 2-[[4-[2-[[(cyclohexylamino)carbonyl](4-cyclohexylbutyl)amino]ethyl]phenyl]thio]-2-methyl-	[M-H]-	0.871351827085376		C15622	Organosulfur compounds	Thioethers	Aryl thioethers	19313.1	15186.6	22513.4	41968.8	9090.97	23269.4	23437.9	35373.1	17719.4	5249.05	42142.9	20074.2	21890.4	23999.4	0.912122	0.770579	0.195688
M295T177	295.03455	176.7880	nodiff	Propanoic acid, 3-[[[2-[(aminoiminomethyl)amino]-4-thiazolyl]methyl]thio]-	[M+Cl]-	0.764563484772217			Organoheterocyclic compounds	Azoles	Thiazoles	48734.5	50945.3	72703.7	26225.1	32860.5	47042.2	46820.5	42594.7	31150.7	34008.9	39385	50394.9	46418.6	40725.8	1.13978	0.451172	0.308689
M73T376_2	73.02924	375.5425	nodiff	Propionic acid	(M-H)-	0.9912	HMDB0000237	C00163	Organic acids and derivatives	Carboxylic acids and derivatives	Carboxylic acids	94307.8	122860	255711	84826.7	37448.7	102626	157109	203385	127209	41640	205475	145779	116297	146766	0.792395	0.452368	0.889125
M130T118	130.06547	117.9995	nodiff	Propionylglycine	[M-H]-	0.986759078920487	HMDB0000783		Organic acids and derivatives	Carboxylic acids and derivatives	Amino acids, peptides, and analogues	44242.3	22390.5	40054.9	37727.1	11668.8	9893.31	29632.2	29915	4954.42	4140.36	42648.9	10331.8	27662.8	20270.5	1.36469	0.428185	0.265441
M397T409	397.08589	408.9950	nodiff	Propoxycarbazone	[M-H]-	0.710825494524091			Benzenoids	Benzene and substituted derivatives	Benzoic acids and derivatives	1657.76	3910.64	2586.69	10736.5	7864.51	955.168	912.319	812.711	796.191	578.579	984.492	831.391	4618.55	819.28	5.63733	0.0370079	0.319013
M235T108	235.13306	107.5000	nodiff	Prostaglandin d1	[M-H-C6H14O2]-	0.787642485629463	HMDB0005102	C06438	Lipids and lipid-like molecules	Fatty Acyls	Eicosanoids	42884.2	21507.5	19065.1	37226.4	55252.2	15859.3	27968.1	38464.9	3905.73	18196.8	24782.1	18007.2	31965.8	21887.5	1.46046	0.233678	0.501333
M331T106_2	331.19041	105.5030	nodiff	Prostaglandin e3	[M-H-H2O]-	0.999596018977621	HMDB0002664	C06439	Lipids and lipid-like molecules	Fatty Acyls	Eicosanoids	228970	45815.2	29504.1	267836	52078.6	46281.3	53040	105981	43226.6	25727.9	33448.6	46143.5	111748	51261.3	2.17996	0.209876	0.933821
M309T186	309.20670	185.6460	nodiff	Prostaglandin f2.alpha.	[M-H-C2H4O]-	0.743413886083313		C00639	Lipids and lipid-like molecules	Fatty Acyls	Eicosanoids	23205.1	10560.5	4125.24	36384.1	8065.23	34084.6	4591.91	6304.13	3084.67	889.447	5061.31	2676.69	19404.1	3768.03	5.14968	0.0208465	0.696103
M351T37	351.22133	36.9100	nodiff	Prostaglandin k1	[M-H]-	0.93958002847637			Lipids and lipid-like molecules	Fatty Acyls	Eicosanoids	14998.2	33943.9	93114.4	96714.4	14556.1	9317.83	6370.01	6618.57	6577.1	6620.43	1442.4	6349.34	43774.1	5662.98	7.72988	0.0441196	0.948382
M839T135	838.53242	135.3540	nodiff	Ps 40:4	[M-H]-	0.814528190513244						13921.3	18181.9	19063.2	18810.4	21349.5	23687.3	13954.6	24667.3	27154.9	14523.6	16930.3	12059.8	19168.9	18215.1	1.05237	0.746278	0.150521
M735T38	734.50710	38.1650	nodiff	PS(16:0/16:0)	(M-H)-	0.8613						35939.8	46533	45190.5	45493.8	30099	27931.2	39741.7	33557.4	11842.2	14834.4	21160	29175.8	38531.2	25051.9	1.53805	0.0373076	0.551762
M243T162_1	243.06241	161.7325	nodiff	Pseudouridine	[M-H]-	0.933933802120627		C02067	Nucleosides, nucleotides, and analogues	Nucleoside and nucleotide analogues		4.03963e+06	4.52065e+06	9.29016e+06	3.06748e+06	3.63385e+06	3.14691e+06	4.40034e+06	5.42274e+06	2.9349e+06	1.56739e+06	5.09752e+06	3.94934e+06	4.61645e+06	3.89537e+06	1.18511	0.536588	0.69743
M335T200	335.11413	200.3695	nodiff	Psoralidin	[M-H]-	0.944849180690576	HMDB0034050	C10523	Phenylpropanoids and polyketides	Isoflavonoids	Coumestans	8057.23	2383.73	3535.83	7208.83	2492.34	4888.08	9803.91	8435.8	2106	1033.28	5961.6	4240.05	4761.01	5263.44	0.904543	0.776779	0.118285
M284T33_1	283.97104	33.2010	nodiff	Pyridoxal 5'-phosphate	(M+K-2H)-	0.7868	HMDB0001491	C00018	Organoheterocyclic compounds	Pyridines and derivatives	Pyridine carboxaldehydes	3196.02	7682.25	6958.3	8368.93	35354.1	7719.73	4473.25	4591.33	19870.2	5697.8	9998.36	13404.2	11546.6	9672.52	1.19375	0.737061	0.128059
M584T184	584.34717	184.1310	nodiff	Pyrrolidinium, 1-[(7r)-7-(acetyloxy)-4-hydroxy-4-oxido-3,5,9-trioxa-4-phosphapentacos-1-yl]-1-methyl-, inner salt	[M+Cl]-	0.823068104037548						20280.4	17675.9	17025.2	16040	11511.1	21846.2	31193.5	33941.7	5625.79	85238.8	39896.1	111184	17396.4	51180	0.339907	0.0615173	0.992923
M485T108	485.32510	108.1570	nodiff	Quillaic acid	[M-H]-	0.982254434062725		C08972	Lipids and lipid-like molecules	Prenol lipids	Triterpenoids	14955.6	5836.29	23288	15877.8	8748.36	8840.06	8420.62	15145.2	15554.6	7698.87	9378.18	12595.7	12924.4	11465.5	1.12724	0.633478	0.214966
M503T437	503.16080	436.9595	nodiff	Raffinose	[M-H]-	0.972356752871365	HMDB0003213	C00492	Organic oxygen compounds	Organooxygen compounds	Carbohydrates and carbohydrate conjugates	3411.48	697.202	268.09	4669.88	16282.3	302.762	412.745	303.637	124.898	170.34	239.485	274.691	4271.94	254.299	16.7989	0.141249	0.336368
M316T429	316.09426	428.9550	nodiff	Raltegravir	[M-H-C4H5N3O2]-	0.935184894913795			Organoheterocyclic compounds	Diazines	Pyrimidines and pyrimidine derivatives	4170.41	4014.38	3472.95	3069.95	7234	4197.53	3829.48	5713.93	2815.55	4894.53	6822.73	7341.54	4359.87	5236.29	0.832625	0.368896	0.158591
M353T27_2	353.20045	27.0720	nodiff	Rauwolscine	[M-H]-	0.937434617780084						29109.9	33860.7	28460.4	29565.4	22549.7	40683.7	36450.6	75896.4	15368.3	20787.9	65322.4	19425.3	30705	38875.2	0.789836	0.468012	0.453373
M949T388	949.42749	387.7530	nodiff	Rebaudioside c	[M-H]-	0.889473352224247			Lipids and lipid-like molecules	Prenol lipids	Terpene glycosides	862.003	443.76	749.817	500.36	751.848	362.519	1230.85	1672.89	630.23	595.975	1390.2	1023.89	611.718	1090.67	0.560863	0.0322133	0.145138
M429T260	429.21160	259.8055	nodiff	Resibufogenin	[M+HCOO]-	0.835567355925287		C17058	Lipids and lipid-like molecules	Steroids and steroid derivatives	Steroid lactones	2005.13	1788.86	867.607	1343.64	6335.29	1506.66	2857.56	6083.86	2703.14	1976.99	1938.38	1861.45	2307.86	2903.56	0.794839	0.584033	0.152035
M577T296	577.13621	296.1000	nodiff	Rhoifolin	[M-H]-	0.786800871638983	HMDB0038848	C12627	Phenylpropanoids and polyketides	Flavonoids	Flavonoid glycosides	20509.2	18056.4	10858.8	17794.3	12070	18895.9	19578.8	17197.7	23490.7	20602.6	9863.26	20274.9	16364.1	18501.3	0.884483	0.412242	0.399672
M297T39	297.24250	38.7720	nodiff	Ricinoleic acid	[M-H]-	0.966206141820371	HMDB0034297	C08365	Lipids and lipid-like molecules	Fatty Acyls	Fatty acids and conjugates	217647	126660	140980	212011	44759.4	284374	137545	219579	46493.9	50659.7	138451	179557	171072	128714	1.32908	0.363512	0.723608
M439T157	439.34141	157.0580	nodiff	Roburic acid	[M-H]-	0.912440504409538			Lipids and lipid-like molecules	Prenol lipids	Triterpenoids	15585.4	8265.32	12305.8	14499.2	7240.69	11510.4	35936.6	49505.7	25323.2	17988.9	24178.1	21116.9	11567.8	29008.2	0.398777	0.0056988	0.823923
M695T33	695.31199	32.9225	nodiff	S4:18(p3:16/f1:2)	[M+HCOO]-	0.947828370158104						500.731	280.55	202.797	572.086	145.224	178.944	5728.07	5085.13	2829.11	2407.94	4814.37	4116.33	313.389	4163.49	0.0752707	3.1793e-05	0.401876
M299T76	299.13852	75.8965	nodiff	Salidroside	[M-H]-	0.877301112218166		C06046	Organic oxygen compounds	Organooxygen compounds	Carbohydrates and carbohydrate conjugates	3502.55	3977.41	2335.26	5322.44	3406.31	11741.6	3473.54	5196.34	3889.92	2822.93	3560.77	2823.23	5047.6	3627.79	1.39137	0.347816	0.147614
M414T35_2	414.26727	35.3080	nodiff	Salmeterol	[M-H]-	0.933525480124737	HMDB0015073	C07241	Benzenoids	Benzene and substituted derivatives	Benzyl alcohols	18190.2	12746.4	15261.3	20114.2	13335.7	9971.2	6707.09	8959.83	4297.14	2242.11	6105.99	5028.62	14936.5	5556.8	2.68797	0.000370648	0.553757
M191T170	191.06678	169.9860	nodiff	Sedoheptulosan	[M-H]-	0.756646733514593						92672	115245	73913.8	102939	80944.5	22473.1	78974.1	119574	57821.7	106460	138201	51376.3	81364.6	92067.8	0.883747	0.594327	0.505865
M535T141	535.30334	140.5490	nodiff	Senegenin	[M-H]-	0.73127986058492			Lipids and lipid-like molecules	Steroids and steroid derivatives	Hydroxysteroids	9799.26	7393.12	9070.77	7089.25	8943.57	6289.5	6564.89	7022.36	5624.48	4566.36	6664.64	14054.3	8097.58	7416.16	1.09188	0.656201	0.0420771
M161T44	161.03512	43.8620	nodiff	Ser-Gly	[M-H]-	0.732427300082545			Organic acids and derivatives	Carboxylic acids and derivatives	Amino acids, peptides, and analogues	18073.7	24807	10958.1	21170.1	21124.5	12182.5	8259.89	7855.8	4578.19	7319.63	10480.3	6476.42	18052.6	7495.04	2.40861	0.00123285	0.584756
M846T194	845.67282	194.1870	nodiff	Sm d40:1	[M+CH3COOH-H]-	0.915035396230425			Lipids and lipid-like molecules	Sphingolipids	Phosphosphingolipids	2410.27	1618.69	2624.28	1625.64	3487.93	1660.3	9785.27	7681.86	2115.56	4395.56	9020	13383.4	2237.85	7730.28	0.289492	0.00807319	0.432773
M870T194	869.67531	194.1480	nodiff	Sm d42:3	[M+CH3COOH-H]-	0.781173100430728			Lipids and lipid-like molecules	Sphingolipids	Phosphosphingolipids	2109.56	2109.72	2687.49	1578.8	2369.28	2325.07	2921.61	2711.07	1533.73	1253.39	2673.1	4097.2	2196.65	2531.68	0.867664	0.469902	0.0944557
M214T385	214.04784	385.3505	nodiff	sn-Glycerol 3-phosphoethanolamine	[M-H]-	0.998484495541618	HMDB0000114	C01233	Lipids and lipid-like molecules	Glycerophospholipids	Glycerophosphoethanolamines	68215	44394.1	85885.4	41246.4	48655.9	37782.9	94003.2	98975.6	47199.2	24883.1	91111.2	58000.9	54363.3	69028.9	0.787544	0.336103	0.73844
M261T293	261.02718	292.9005	nodiff	Sorbitol 6-phosphate	[M-H]-	0.954459681022636		C01096	Organic oxygen compounds	Organooxygen compounds	Carbohydrates and carbohydrate conjugates	7766.83	12975.3	7910.4	4683.44	19891.5	7217.68	7421.98	8286.7	4822.98	3561.43	9809.26	5597.02	10074.2	6583.23	1.53028	0.183709	0.316929
M765T201	765.42163	200.8005	nodiff	Soyasapogenol b base + o-hexa-pen	[M-H]-	0.936106491415606	HMDB0039518		Lipids and lipid-like molecules	Prenol lipids	Terpene glycosides	1259.31	464.915	860.755	1141	815.854	806.439	1317.83	1161.31	332.321	156.813	1122.99	900.933	891.378	832.033	1.07133	0.798234	0.0560249
M1038T193	1037.54718	193.0075	nodiff	Soyasapogenol b base + o-hexa-pen-dhex, o-c6h7o3	[M-H]-	0.93166437534793			Lipids and lipid-like molecules	Prenol lipids	Terpene glycosides	1319.78	313.412	1512.13	1529.86	1175.45	1346.84	223.604	386.425	33.5589	145.886	97.8684	79.6106	1199.58	161.159	7.44346	0.000302687	0.189658
M665T488	665.21399	487.7570	nodiff	Stachyose	[M-H]-	0.966998564527604	HMDB0003553	C01613	Organic oxygen compounds	Organooxygen compounds	Carbohydrates and carbohydrate conjugates	1284.03	430.172	415.721	861.388	4347.92	315.137	299.516	426.365	475.973	339.176	349.285	495.916	1275.73	397.705	3.20772	0.195532	0.143147
M243T296	243.09810	295.6890	nodiff	Suberosin	[M-H]-	0.779074797418166						10017.6	3468.17	16680.3	13610	9110.49	7103.37	34488.3	24566.3	7736.34	12844.3	29226.5	17995.6	9998.32	21142.9	0.472893	0.0345391	0.609671
M117T112	117.03386	112.0945	nodiff	Succinate	[M-H]-	0.909391465271702	HMDB0000254	C00042	Organic acids and derivatives	Carboxylic acids and derivatives	Dicarboxylic acids and derivatives	9441.46	20666.5	11441	6679.07	6095.09	10695.3	12294.3	12470.6	1007.37	10189	11436.5	12049.6	10836.4	9907.9	1.09371	0.748061	0.0531339
M574T32	574.45129	31.9480	nodiff	Sulfobacin b	[M-H]-	0.819994376168454			Lipids and lipid-like molecules	Fatty Acyls	Fatty amides	186613	226145	994941	1.07433e+06	185215	814550	462132	427633	176585	84848.9	306114	378306	580299	305937	1.8968	0.167121	2.26303
M283T30_2	283.10946	30.4555	nodiff	Swietenocoumarin b	[M-H]-	0.982453617169432			Phenylpropanoids and polyketides	Coumarins and derivatives	Furanocoumarins	51106.3	23484.5	48758.4	36930	25348.5	30591.4	61527.3	40953.6	33138.4	24800.9	87877.7	42915.9	36036.5	48535.6	0.742476	0.26069	0.629594
M119T107	119.01632	107.1700	nodiff	Tartronate	[M-H]-	0.815723550556458	HMDB0035227	C02287	Organic acids and derivatives	Carboxylic acids and derivatives	Dicarboxylic acids and derivatives	42059.1	87373	20943.3	38698.6	41142.6	17875.9	26430.9	31764	46673.6	47678.3	35034.9	40811.5	41348.7	38065.5	1.08625	0.765809	0.308222
M124T289_2	124.00733	288.7700	nodiff	Taurine	[M-H]-	0.999959249728513	HMDB0000251	C00245	Organic acids and derivatives	Organic sulfonic acids and derivatives	Organosulfonic acids and derivatives	6.63816e+06	6.5704e+06	9.78965e+06	5.59439e+06	6.56433e+06	6.54825e+06	1.01753e+07	1.05752e+07	6.74545e+06	2.99955e+06	1.15839e+07	8.16837e+06	6.95086e+06	8.37462e+06	0.829992	0.339421	7.66577
M514T180_2	514.28468	179.6045	nodiff	Taurocholate	[M-H]-	0.993012364820088	HMDB0000036	C05122	Lipids and lipid-like molecules	Steroids and steroid derivatives	Bile acids, alcohols and derivatives	1.51341e+06	207486	2.30269e+06	9.43693e+06	738362	8.09025e+06	65528.2	459934	64274.6	183243	114532	100571	3.71485e+06	164680	22.558	0.0547983	10.1056
M278T88	278.10608	87.7320	nodiff	Tazarotenic acid	[M-H-CO2]-	0.730905008287339	HMDB0060619	C21518				2430.14	2206.14	2388.21	2396.29	5043.63	2244.81	7496.77	12174	7354.7	5101.79	48511.7	10710.4	2784.87	15224.9	0.182916	0.095254	0.620509
M284T33_2	284.04289	32.5710	nodiff	Tectorigenin	[M-H-CH3]-	0.769420866270544	HMDB0042024	C10534	Phenylpropanoids and polyketides	Isoflavonoids	Isoflav-2-enes	4925.87	9678.87	3478.71	2402.87	34998.9	12621.1	5742.26	7372.27	17716.5	6632.1	8507.64	8109.69	11351.1	9013.42	1.25935	0.668574	0.168979
M257T238	257.17504	237.6575	nodiff	Tetradecanedioic acid	[M-H]-	0.818373326307984	HMDB0000872		Lipids and lipid-like molecules	Fatty Acyls	Fatty acids and conjugates	42000.2	20395.9	16916.8	38832.4	20957.2	33540.3	12187.6	14214.2	7013.54	3898.77	14669.1	7580.02	28773.8	9927.21	2.89848	0.00253096	0.779941
M252T125	252.09031	125.3575	nodiff	Thiorphan	[M-H]-	0.757463740626498		C01619	Organic acids and derivatives	Carboxylic acids and derivatives	Amino acids, peptides, and analogues	17232.7	12776.9	14667.4	8205.99	21247.5	6525.71	14219	23090.9	17740.2	15424.7	17453.6	14016	13442.7	16990.7	0.791178	0.209033	0.383933
M369T143	369.22744	142.5885	nodiff	Thromboxane b2	[M-H]-	0.73985776464539	HMDB0003252	C05963	Lipids and lipid-like molecules	Fatty Acyls	Eicosanoids	46628.3	16733.5	3461.26	28515.1	65579.6	13055.6	13918.2	14217.8	3738.42	3401.62	11865	9557.46	28995.6	9449.75	3.06839	0.0716152	0.75861
M311T29	311.16820	29.0820	nodiff	Thymol-beta-d-glucoside	[M-H]-	0.998926254188997			Lipids and lipid-like molecules	Prenol lipids	Terpene glycosides	940668	869460	915793	1.19068e+06	583852	1.07472e+06	1.25126e+06	2.31191e+06	699445	1.0796e+06	6.54383e+06	1.10383e+06	929196	2.16498e+06	0.429194	0.203071	5.66076
M429T219	429.26212	218.6340	nodiff	Trandolapril	[M-H]-	0.838718065174793			Organic acids and derivatives	Carboxylic acids and derivatives	Amino acids, peptides, and analogues	274.739	344.096	2266.9	10171.3	473.196	2416.19	1158.58	109.004	45.2842	1240.61	1313.88	967.236	2657.73	805.766	3.29839	0.266016	0.181774
M356T36	356.19110	36.3000	nodiff	Trans-epoxysuccinyl-l-leucylamido(4-guanidino)butane	[M-H]-	0.863883856915383		C01341	Organoheterocyclic compounds	Epoxides	Oxirane carboxylic acids and derivatives	23156	20635.9	24568.3	20319.9	9552.94	12181.2	3872.08	3678.32	6286.25	4325.73	2442.47	1155.46	18402.4	3626.72	5.07411	0.000197704	0.705386
M341T359	341.10791	359.0200	nodiff	Trehalose	[M-H]-	0.987539011692178	HMDB0000975	C01083	Organic oxygen compounds	Organooxygen compounds	Carbohydrates and carbohydrate conjugates	19530.4	9823.66	4259.26	15288.9	314503	6174.95	6183.6	7394.74	7759.98	5120.4	5567.4	6848.31	61596.7	6479.07	9.50703	0.30191	1.2445
M353T40	353.34120	40.0140	nodiff	Tricosanoic acid	[M-H]-	0.982731491212059	HMDB0001160		Lipids and lipid-like molecules	Fatty Acyls	Fatty acids and conjugates	50315.1	28731.7	26212.7	54302.3	42615.3	31762.1	32435.6	45650.5	53116.3	24879.5	16256.8	36507.6	38989.9	34807.7	1.12015	0.579589	0.205147
M283T30_3	283.13729	30.0875	nodiff	Tropisetron	[M-H]-	0.844443127537104		C13666	Organoheterocyclic compounds	Indoles and derivatives	Indolecarboxylic acids and derivatives	10185.3	32625.4	6422.09	36368.1	20420.9	13366.9	8289.12	11493.5	4630	10276.7	40021.4	12547.1	19898.1	14543	1.36823	0.476183	0.276586
M294T296	294.10055	296.0840	nodiff	Tyr-Asn	[M-H]-	0.911116147762316			Organic acids and derivatives	Carboxylic acids and derivatives	Amino acids, peptides, and analogues	1781.42	2352.79	2564.62	2214.17	4344.04	2659.13	6472.3	12430.9	2306.62	2654.75	29748.9	5695.23	2652.69	9884.78	0.268362	0.120252	0.480836
M606T418	606.07340	418.2890	nodiff	Udp-n-acetylglucosamine	[M-H]-	0.973696091778645	HMDB0000290	C00043	Nucleosides, nucleotides, and analogues	Pyrimidine nucleotides	Pyrimidine nucleotide sugars	9637.69	10993.2	10395.8	6873.49	11920.4	9141.54	10931.5	3526.97	5145.32	4889.06	10913.9	12058	9827.02	7910.79	1.24223	0.285809	0.114518
M323T430	323.02753	429.6695	nodiff	Uridine 5'-monophosphate	[M-H]-	0.975946488484225	HMDB0000288	C00105	Nucleosides, nucleotides, and analogues	Pyrimidine nucleotides	Pyrimidine ribonucleotides	6424.81	7608.44	5794.56	5221.03	5606.56	5136.63	6482.98	4270.95	4950.89	5045.87	10636.4	9482.4	5965.34	6811.59	0.875763	0.476214	0.162734
M137T282	137.03480	281.6220	nodiff	Urocanate	[M-H]-	0.958256663861464	HMDB0000301	C00785	Organoheterocyclic compounds	Azoles	Imidazoles	1598.75	3424.87	5161.19	3040.87	5946.58	1899.85	2608.4	852.423	1097.33	1707.85	1348.56	2379.48	3512.02	1665.68	2.10847	0.0367392	0.194324
M407T219	407.27905	218.9380	nodiff	Ursocholic acid	[M-H]-	0.997241260709175	HMDB0000917	C17644	Lipids and lipid-like molecules	Steroids and steroid derivatives	Bile acids, alcohols and derivatives	13706	23393.4	268235	1.19815e+06	35751.8	148785	1531.08	9632.54	1492.71	2423.29	1948.19	3063.6	281338	3348.57	84.0173	0.169383	2.36645
M263T184	263.13933	184.1570	nodiff	Val-Phe	[M-H]-	0.969411426373193			Organic acids and derivatives	Carboxylic acids and derivatives	Amino acids, peptides, and analogues	40605.1	15428.5	8833.81	2709.26	10081.7	22304.8	8373.98	3627.91	1482.78	277.085	7848.92	2896.32	16660.5	4084.5	4.07896	0.0505586	0.527248
M233T33	233.15413	33.1940	nodiff	Valerenic acid	[M-H]-	0.987149217142332		C09743	Lipids and lipid-like molecules	Prenol lipids	Sesquiterpenoids	51403.3	106394	52690.1	50584.8	40892.3	64896.8	44720.1	41084.5	42465.1	36384	48909.2	43385.2	61143.5	42824.7	1.42776	0.0888809	0.565737
M101T93	101.06019	92.7165	nodiff	Valeric acid	[M-H]-	0.905917853771919	HMDB0000892	C00803	Lipids and lipid-like molecules	Fatty Acyls	Fatty acids and conjugates	20762.4	39975.7	30895.6	26866.1	19442.6	10655.5	16801	54562	3863.41	31002.3	30720.5	14997.2	24766.3	25324.4	0.977963	0.947795	0.100645
M115T321_2	114.97946	320.7265	nodiff	Vitamin c	[M-H-C2H4O2]-	0.747238465653572	HMDB0000044	C00072	Organoheterocyclic compounds	Dihydrofurans	Furanones	51951.3	62969	60039	48953.6	62800.9	50916.7	65026.5	73048.5	35498	21617.4	68158.8	53974.4	56271.7	52887.3	1.06399	0.705435	0.442823
M283T302	283.06754	301.6145	nodiff	Xanthosine	[M-H]-	0.986884826697527	HMDB0000299	C01762	Nucleosides, nucleotides, and analogues	Purine nucleosides		14409.3	12975.9	159281	10023.9	8252.45	7708.59	23845.5	40970.6	23322.3	6751.91	39203.7	27502.7	35441.8	26932.8	1.31594	0.743657	0.214734
M211T283	211.00072	283.2960	nodiff	Xanthosine 5'-monophosphate	[M-H-C5H4O2N4]-	0.954914676803505	HMDB0001554	C00655	Nucleosides, nucleotides, and analogues	Purine nucleotides	Purine ribonucleotides	3483.57	5675.23	4936.6	4295.54	5563.92	4380.93	5773.98	5634.71	2263.52	2516.1	5169.06	2884.8	4722.63	4040.36	1.16886	0.387847	0.135483
M265T27	265.14724	26.8120	nodiff	Zinniol	[M-H]-	0.960026046672596		C10840	Benzenoids	Benzene and substituted derivatives	Benzyl alcohols	79680.7	117520	90242	126918	116224	126282	175049	179735	77384.7	77632.3	142538	74991.8	109478	121222	0.90312	0.607189	0.601576
M223T36_1	223.02866	35.6930	nodiff									3.87169e+07	3.90049e+07	4.02786e+07	3.42866e+07	2.79416e+07	2.95824e+07	3.83164e+07	4.03056e+07	2.61845e+07	2.62756e+07	2.76386e+07	3.48725e+07	3.49685e+07	3.22655e+07	1.08377	0.440511	7.07438
M223T30	222.99320	29.7830	nodiff									1.44085e+06	7.00258e+06	4.08525e+06	1769.58	20221.7	5.71644e+06	1527.47	2997.87	3044.26	152916	1.90018e+06	1.35582e+06	3.04452e+06	569413	5.34676	0.0799067	7.58278
M187T26	187.00744	26.2970	diff									1.14814e+07	1.40184e+07	5.05102e+06	6.13308e+06	3.66977e+07	5.69183e+06	2.00354e+06	2.44541e+06	2.49798e+06	2.30339e+06	1.79996e+06	2.05795e+06	1.31789e+07	2.18471e+06	6.03235	0.0498002	17.7531
M173T26	172.99119	26.3680	nodiff									1.69137e+06	1.20372e+07	1.05208e+06	1.36724e+07	5.63541e+06	3.13037e+06	773257	1.09296e+06	1.91984e+06	2.50518e+06	1.53405e+06	716358	6.20315e+06	1.42361e+06	4.35735	0.0575421	10.9448
M239T36_1	239.05969	36.2545	nodiff									6.54274e+06	7.83027e+06	7.86396e+06	5.57051e+06	5.51597e+06	6.77622e+06	7.65198e+06	7.42188e+06	4.92777e+06	4.8848e+06	5.29284e+06	7.89883e+06	6.68328e+06	6.34635e+06	1.05309	0.653096	2.72402
M737T39	736.52127	39.3400	nodiff									208009	187162	2.43874e+06	220940	35192.3	124928	3.23293e+06	2.67593e+06	987462	362053	603690	2.70331e+06	535829	1.7609e+06	0.304293	0.0831742	5.69951
M480T190_2	480.30961	190.1590	nodiff									7.19616e+06	8.13028e+06	1.05e+07	7.51164e+06	7.1483e+06	7.21726e+06	1.22731e+07	1.28044e+07	8.37056e+06	5.74329e+06	1.30854e+07	9.78124e+06	7.95061e+06	1.0343e+07	0.768695	0.0968096	10.6526
M367T297_2	367.10592	297.3150	nodiff									2.03274e+07	2.19103e+07	2.8589e+07	2.12716e+07	9.97811e+06	2.36826e+07	2.68264e+07	2.84138e+07	2.56834e+07	1.69581e+07	3.05907e+07	2.78374e+07	2.09598e+07	2.60516e+07	0.804549	0.138682	15.9157
M279T162	279.03966	161.9085	nodiff									7.42227e+06	8.63269e+06	1.7376e+07	5.86683e+06	7.05256e+06	6.29959e+06	8.70206e+06	1.03273e+07	5.58272e+06	2.99864e+06	9.85425e+06	7.70076e+06	8.77499e+06	7.52763e+06	1.1657	0.565768	0.864703
M554T191_2	554.34609	191.2225	diff									2.19737e+06	2.11667e+06	3.88443e+06	1.76114e+06	1.45367e+06	1.65343e+06	5.64945e+06	4.78828e+06	5.41663e+06	3.52904e+06	5.85547e+06	4.67321e+06	2.17779e+06	4.98535e+06	0.436838	0.000226556	11.5819
M554T187	554.30582	186.5650	nodiff									1.19334e+06	804616	801082	1.40082e+06	896786	1.09393e+06	690227	1.33799e+06	3.68615e+06	2.3903e+06	567719	1.62177e+06	1.03176e+06	1.71569e+06	0.601367	0.191432	5.98473
M504T189_2	504.30974	188.6970	nodiff									5.34779e+06	3.34713e+06	3.61692e+06	5.5131e+06	3.45978e+06	3.16365e+06	4.15686e+06	4.21715e+06	2.5691e+06	2.11226e+06	3.81624e+06	2.67584e+06	4.07473e+06	3.25791e+06	1.25072	0.183504	2.87364
M508T186	508.34027	186.4130	nodiff									4.57184e+06	5.34502e+06	6.86267e+06	4.7326e+06	4.4547e+06	4.58917e+06	5.28696e+06	5.17464e+06	5.10981e+06	2.49513e+06	6.02789e+06	4.57944e+06	5.09267e+06	4.77898e+06	1.06564	0.624832	1.2206
M249T37	249.00530	36.6220	nodiff									4.68977e+06	917533	210052	838842	5.2921e+06	3.34405e+06	39180.8	51895.1	6.50886e+06	7.09385e+06	25069.4	23606	2.54872e+06	2.29041e+06	1.11278	0.881096	5.54901
M97T416_2	96.95992	416.1825	nodiff									2.69306e+06	3.25178e+06	2.40265e+06	2.65987e+06	4.14596e+06	1.86303e+06	2.37396e+06	2.79472e+06	1.77591e+06	1.51266e+06	2.6451e+06	2.0051e+06	2.83606e+06	2.18458e+06	1.29822	0.117729	3.70583
M514T194	514.28400	193.7030	diff									987059	131073	723502	2.86603e+06	1.14118e+06	2.95721e+06	20664.1	235273	18850.2	59782.1	37177.8	59615.5	1.46767e+06	71893.8	20.4145	0.0154734	6.6885
M239T419	238.89206	418.8410	nodiff									1.4901e+06	1.24347e+06	1.39736e+06	1.52642e+06	1.33871e+06	2.26073e+06	1.40114e+06	1.25819e+06	1.50133e+06	1.47776e+06	1.5863e+06	1.56811e+06	1.5428e+06	1.46547e+06	1.05276	0.634138	2.17972
M319T57	319.22820	56.6295	nodiff									2.29828e+06	1.32955e+06	367994	1.24943e+06	2.66431e+06	2.93053e+06	1.24029e+06	1.22918e+06	633194	1.26726e+06	1.10682e+06	1.08357e+06	1.80668e+06	1.09339e+06	1.65237	0.11527	3.73985
M79T56_2	78.91865	56.0400	diff									6.93426e+06	6.94698e+06	6.97707e+06	6.9959e+06	7.36879e+06	7.23526e+06	6.12818e+06	6.67175e+06	4.26011e+06	3.45815e+06	5.87876e+06	4.89239e+06	7.07638e+06	5.21489e+06	1.35696	0.00422432	7.69087
M688T176	687.54684	176.3785	diff									3.33516e+06	3.64877e+06	3.22307e+06	4.14439e+06	3.83724e+06	3.50342e+06	3.26226e+06	3.46771e+06	1.71562e+06	1.03663e+06	3.53085e+06	2.53366e+06	3.61534e+06	2.59112e+06	1.39528	0.0430094	5.72315
M81T56_1	80.91710	56.2815	diff									7.02285e+06	6.55056e+06	6.99922e+06	7.33364e+06	7.37765e+06	7.22269e+06	6.3132e+06	6.6866e+06	4.08045e+06	3.48266e+06	5.52871e+06	4.62172e+06	7.08444e+06	5.11889e+06	1.38398	0.00418591	7.90446
M737T55	736.52018	55.2305	diff									90160.2	53851.7	781045	79767.4	14259.3	71538.7	1.20079e+06	1.08167e+06	630981	510404	633318	1.17697e+06	181770	872356	0.208367	0.00281094	5.21103
M582T187	582.37637	187.4275	diff									194005	248231	342563	207920	178665	260783	375816	249837	2.48049e+06	1.66503e+06	417687	1.92037e+06	238694	1.18487e+06	0.201452	0.0360529	6.54399
M524T190_2	524.27764	189.5730	diff									584510	487058	1.56639e+06	645436	367612	412224	2.17719e+06	2.14543e+06	1.98976e+06	1.05725e+06	1.95233e+06	1.87013e+06	677204	1.86535e+06	0.363045	0.000746739	7.3594
M506T187	506.32393	187.4275	nodiff									1.8177e+06	1.69644e+06	2.0168e+06	1.86115e+06	1.20627e+06	1.76538e+06	2.64988e+06	2.60484e+06	1.80194e+06	1.4776e+06	2.72066e+06	1.91248e+06	1.72729e+06	2.19457e+06	0.787076	0.0843342	4.60388
M385T171	385.22288	170.9020	nodiff									7380.94	3359.47	9162.54	5310.22	6305.33	4833.87	386928	209918	20351.3	84028.4	1.7742e+06	151822	6058.73	437874	0.0138367	0.143647	3.42309
M578T190	578.34654	189.9620	diff									856826	472997	932746	628984	307462	417575	1.5384e+06	1.025e+06	1.73781e+06	1.44973e+06	1.44437e+06	1.3313e+06	602765	1.4211e+06	0.424153	0.000168018	6.26992
M627T64_2	627.49957	64.0905	diff									66450.2	5141.81	87902.2	39832.2	27798.5	18589.5	819485	472433	620750	822504	777551	1.25294e+06	40952.4	794278	0.0515593	3.85959e-05	5.55795
M284T47_3	284.26677	46.6560	nodiff									1.85742e+06	1.25222e+06	1.02011e+06	2.51834e+06	915920	2.23144e+06	1.00914e+06	1.17051e+06	1.7904e+06	1.55549e+06	1.10153e+06	1.75737e+06	1.63257e+06	1.39741e+06	1.16829	0.461244	3.20978
M500T191_2	500.27767	190.7575	nodiff									1.14271e+06	909123	1.4469e+06	1.10222e+06	970228	740666	1.65024e+06	1.46529e+06	1.30984e+06	803883	1.41148e+06	1.13735e+06	1.05198e+06	1.29635e+06	0.811493	0.147222	3.46956
M255T39	254.98111	38.7815	nodiff									162437	247867	128700	168022	1.14734e+06	152841	103355	138956	60866.2	17847.7	101263	70973.4	334534	82210	4.06926	0.155566	2.79837
M588T32	588.46599	31.9725	nodiff									166356	157663	757985	739734	127678	648389	452482	334101	115654	62594.6	270789	328408	432968	260671	1.66097	0.248605	1.65456
M62T36_2	61.98837	36.2990	diff									1.48215e+06	632741	1.1117e+06	1.34728e+06	729129	1.00633e+06	1.37306e+06	1.71135e+06	1.79972e+06	2.06649e+06	3.08713e+06	1.72365e+06	1.05156e+06	1.96023e+06	0.536444	0.008541	6.20074
M166T187	166.01742	186.5070	nodiff									387532	545115	287830	420435	1.22812e+06	430736	435052	666310	931254	549998	513833	455122	549961	591928	0.929102	0.797111	1.04914
M203T26	203.00155	25.7840	nodiff									79983.9	117425	49307.7	62636.6	393979	25761.6	26725.5	59712.5	50548.2	29569.6	21159.4	12715	121516	33405	3.63765	0.149337	1.49225
M765T39	764.54992	38.7800	diff									66085.9	33627.9	307097	59881.4	16340.1	37474.3	483417	465645	213028	96222.2	105964	395735	86751.2	293335	0.295741	0.0353844	2.53639
M604T35	604.46185	34.7690	nodiff									176891	207136	831852	728820	131771	320184	231166	201992	60296.9	29943.9	148019	165753	399442	139529	2.8628	0.0696734	2.36235
M187T221_1	187.04259	221.3850	nodiff									3.79259e+06	2.58474e+06	3.92549e+06	2.91398e+06	2.85282e+06	3.59624e+06	4.55868e+06	5.16115e+06	1.46695e+06	254384	4.55421e+06	3.22146e+06	3.27764e+06	3.2028e+06	1.02337	0.930134	3.86172
M743T138	743.46617	137.9330	nodiff									1.5883e+06	3968.35	4357.69	1.83961e+06	4132.86	1.18372e+06	2399.29	3443.08	10515	5403.31	1.01841e+06	13263.4	770682	175573	4.38952	0.15941	3.37791
M231T234	230.99630	234.4675	nodiff									91592.8	146005	30720.5	216861	2.47324e+06	21732.1	12519.4	22846.4	13335.3	18276.7	32207.8	9828.98	496692	18169.1	27.3372	0.255201	3.70653
M512T180	512.26780	180.3250	nodiff									111475	190891	649339	1.73819e+06	137109	1.82695e+06	24562.5	98653.6	18491.1	161990	34526.3	58778.8	775659	66167	11.7228	0.056648	4.558
M768T142_1	767.54477	141.6195	diff									1.45798e+06	1.72206e+06	2.59479e+06	1.62145e+06	1.82735e+06	1.5485e+06	1.12431e+06	1.14809e+06	696045	555935	1.12563e+06	960317	1.79536e+06	935054	1.92006	0.00142731	5.05135
M80T25	79.95699	25.2650	diff									356041	505782	141865	367275	1.09253e+06	309556	137266	160340	185366	171092	104094	104932	462175	143848	3.21294	0.0407622	2.97503
M149T37	149.00910	36.8590	diff									590389	513869	568061	569270	509389	422381	666542	855527	917456	827866	452991	656384	528893	729461	0.725046	0.0223148	3.20211
M528T185	528.30893	185.3380	nodiff									1.02394e+06	1.16323e+06	1.41901e+06	962317	1.00409e+06	866339	1.48151e+06	1.7896e+06	1.34979e+06	784761	1.35119e+06	1.06624e+06	1.07315e+06	1.30385e+06	0.823067	0.184995	3.33132
M228T34	227.99673	33.8285	diff									524992	1.27596e+06	123528	785323	954663	263106	56822.2	169342	178652	63885.4	54016.8	161423	654596	114023	5.74088	0.012999	4.00037
M228T27	228.02695	27.1370	diff									493775	1.28544e+06	22567.2	722311	923452	194131	11540.7	12378	177037	50964	66217.5	12815.1	606946	55158.7	11.0036	0.017046	3.99369
M302T171_1	302.06558	171.1140	nodiff									13146.8	635120	3.0514e+06	13892.2	13214.8	312159	44903.2	45961.7	46286	13885.8	25586.8	24988.7	673156	33602	20.0332	0.217817	3.04726
M302T171_2	302.09237	171.2150	nodiff									36072.6	628749	3.03103e+06	36983.9	19328.3	309675	29909	37278.3	5289.69	4475.09	19827.5	13552	676973	18388.6	36.8148	0.200654	3.13559
M366T297_4	366.10897	297.3205	nodiff									3.49195e+06	3.72465e+06	5.06293e+06	3.72232e+06	1.79239e+06	4.15578e+06	4.56453e+06	4.91314e+06	4.42723e+06	2.96865e+06	5.34984e+06	4.78511e+06	3.65834e+06	4.50142e+06	0.812708	0.156145	6.53002
M196T178	196.01051	177.7030	nodiff									167119	121361	67667.7	133048	612547	125790	45123.1	59325.5	61290.2	52205	63112.5	54141.9	204589	55866.4	3.66212	0.102243	2.00571
M196T187	196.02784	186.9240	nodiff									161257	109382	2084.01	139832	681166	109443	44231.7	60287.1	66119.4	59089	61852.4	50537.4	200527	57019.5	3.51682	0.176808	1.9488
M363T174	363.25301	173.7560	nodiff									10623.3	144997	13576.7	8194.52	1.08827e+06	3794.63	14625.1	23444.4	8961.03	3742.38	13699.6	10909.5	211576	12563.7	16.8403	0.286517	2.41932
M552T184	552.30946	184.1195	nodiff									579978	408334	802663	615250	438983	520004	962190	1.191e+06	687858	420281	964810	651872	560869	813003	0.689873	0.0756556	3.24342
M297T35	297.04661	34.8200	nodiff									409399	371242	400746	434496	343712	414839	527149	558352	275841	238073	385581	360421	395739	390903	1.01237	0.93121	0.437185
M62T11	61.98849	10.7750	nodiff									2.58838e+06	182390	1.50466e+06	3.82201e+06	868203	1.08664e+06	991941	4.41814e+06	1.35085e+06	934663	1.66066e+06	1.2917e+06	1.67538e+06	1.77466e+06	0.944058	0.898954	1.05894
M201T26	201.02172	26.0250	diff									291553	86917.1	39771.6	162459	204971	67210	10729.6	8863.32	12533.3	9076.43	5365.08	5952.71	142147	8753.41	16.239	0.00664104	1.95494
M187T244	187.04242	243.6375	nodiff									2.06329e+06	1.78056e+06	1.59998e+06	1.95382e+06	1.75868e+06	2.60925e+06	2.83577e+06	3.26438e+06	703861	2.80146e+06	2.9515e+06	2.05248e+06	1.96093e+06	2.43491e+06	0.80534	0.273831	2.84883
M343T41	343.22710	40.6390	nodiff									284250	167751	56745.6	497948	264776	205596	158935	161120	110155	117718	129253	119857	246178	132840	1.85319	0.0923643	1.53629
M602T188	602.34492	188.1885	nodiff									10498.6	26314.6	17338.5	110191	11946.4	130179	17381.8	20212.2	315270	234195	24130.7	213834	51078	137504	0.371466	0.170043	2.04288
M447T29	446.99359	29.1705	diff									396489	407013	207053	332606	499254	843040	182114	196006	205784	190092	146968	137697	447576	176443	2.53665	0.0124061	2.83105
M241T76	241.18053	76.1810	nodiff									1.31381e+06	821898	645176	2.84969e+06	346713	2.42155e+06	526188	1.62143e+06	277866	50328	724548	869975	1.39981e+06	678389	2.06343	0.157081	3.99719
M772T142	771.57524	142.3140	diff									847239	1.20804e+06	730497	1.33403e+06	1.18035e+06	1.21587e+06	386894	661993	222365	202473	788617	290528	1.086e+06	425479	2.55243	0.000799449	5.00398
M223T53	223.16985	52.7520	nodiff									238476	92981.8	105065	247390	63428.1	685260	137195	215223	249448	270727	344721	201450	238767	236461	1.00975	0.98187	0.870963
M227T39	227.20109	38.7710	diff									549726	363746	371190	399852	203944	340074	574806	693534	597306	470960	559439	653949	371422	591666	0.627757	0.00260137	3.30217
M62T705	61.98849	705.4895	nodiff									936883	86882.8	952385	1.11121e+06	1.23279e+06	1.10706e+06	1.12081e+06	1.11622e+06	1.71367e+06	1.78557e+06	1.54702e+06	995996	904535	1.37988e+06	0.655516	0.0559973	4.28309
M769T142_1	768.55214	141.6850	diff									782317	832392	1.00597e+06	813145	713393	802235	753223	518346	386640	332022	622486	482373	824908	515848	1.59913	0.00200722	3.03828
M62T69	61.98849	69.0200	nodiff									1.94346e+06	2.61049e+06	1.93378e+06	1.87914e+06	1.96357e+06	942442	2.24888e+06	1.89755e+06	3.36343e+06	3.92711e+06	1.85852e+06	3.59444e+06	1.87881e+06	2.81499e+06	0.667432	0.0563503	6.78648
M247T354	246.98117	353.9345	nodiff									3.04763e+06	2.99971e+06	2.95025e+06	3.12033e+06	3.15428e+06	3.08253e+06	2.97382e+06	3.07178e+06	1.28376e+06	759054	2.91488e+06	2.23355e+06	3.05912e+06	2.20614e+06	1.38664	0.0591175	5.16654
M411T354	410.98680	353.9670	diff									1.99771e+06	1.91744e+06	1.83298e+06	2.07845e+06	2.02472e+06	2.00867e+06	1.84023e+06	2.00596e+06	373588	147125	1.86906e+06	1.00238e+06	1.97666e+06	1.20639e+06	1.63849	0.0445364	5.2438
M197T139	197.03096	139.0695	nodiff									1.27414e+06	1.14426e+06	1.41295e+06	1.19987e+06	1.52072e+06	722582	1.98726e+06	3.19379e+06	179964	38300.7	2.64691e+06	923897	1.21242e+06	1.49502e+06	0.810972	0.617416	4.36527
M287T73	287.00720	72.6490	nodiff									312289	516740	278249	279980	2.21982e+06	227557	145490	207134	137403	45665.2	190462	134239	639105	143399	4.45684	0.15198	3.8053
M560T186	560.33031	186.2155	nodiff									651055	721860	919152	695956	662087	741228	715141	727985	181633	27254.7	749088	200873	731889	433662	1.68769	0.0604769	2.99973
M223T354	223.01986	353.9670	diff									1.59761e+06	1.47139e+06	1.41758e+06	1.69459e+06	1.62696e+06	1.5813e+06	1.43997e+06	1.57407e+06	276570	135432	1.40108e+06	696952	1.56491e+06	920677	1.69973	0.0338109	4.83626
M602T33	602.44737	33.1940	nodiff									61153.9	149797	477576	417176	39849.9	268889	157002	119466	50468.9	23357.1	100985	118763	235740	95006.7	2.4813	0.100021	1.74257
M388T37	388.25149	36.9040	diff									213806	186896	177577	306501	136222	246144	115216	170475	65026.3	48863.9	72379.5	77724.9	211191	91614.2	2.30522	0.002741	2.00556
M763T39	762.53212	38.7760	nodiff									41497.1	44669.5	211327	44485.1	36881.7	35417	313874	125785	72353.7	58046.8	84227.3	161993	69046.3	136047	0.50752	0.194372	1.20455
M627T39	627.49930	39.3930	nodiff									33804.9	12130.7	56573.4	27342	25214.8	18307.5	234357	165941	3042.24	4425.42	135347	319904	28895.5	143836	0.200892	0.0504487	1.73838
M329T354	328.98386	354.0895	nodiff									2.00211e+06	1.96697e+06	1.88227e+06	2.1026e+06	2.03293e+06	2.02164e+06	1.89999e+06	2.05081e+06	569930	280406	1.92273e+06	1.20573e+06	2.00142e+06	1.3216e+06	1.51439	0.0542369	4.81652
M396T288	396.00587	287.5560	nodiff									746223	756208	727312	466238	1.18177e+06	584724	705231	780290	682593	189361	952065	755684	743747	677537	1.09772	0.656436	1.77299
M559T186	559.33449	186.2340	nodiff									539998	621743	760490	578538	546714	638015	607549	635601	144279	30254.7	647716	179844	614250	374207	1.64147	0.0755779	2.68767
M305T354	305.02255	353.9670	diff									1.36097e+06	1.18052e+06	1.14272e+06	1.41756e+06	1.41379e+06	1.32094e+06	1.17303e+06	1.30151e+06	179181	77146.1	1.15166e+06	495171	1.30608e+06	729615	1.7901	0.0297734	4.63772
M512T134	512.26764	134.0020	diff									183618	69008.9	191549	175187	339684	350387	7577.07	44503.4	16142.3	43305.5	11534.8	13890.9	218239	22825.7	9.56112	0.00136994	2.5922
M602T184	602.30129	184.0730	nodiff									241919	204996	324387	274438	211401	223851	434334	524917	86545.3	446680	426733	182658	246832	350311	0.704608	0.187758	1.46727
M114T182_2	114.03032	181.9675	diff									527079	745987	481396	537806	1.11133e+06	484643	322466	329278	93060.6	33234.8	354993	209723	648039	223793	2.89571	0.00419612	4.02869
M578T185	578.30122	185.2135	nodiff									455052	562596	604449	460955	482030	422769	662271	811037	174948	39210.8	576363	216851	497975	413447	1.20445	0.530106	1.8454
M743T125	742.54128	124.6965	nodiff									499561	2.29876e+06	2.49699e+06	1.84416e+06	1.9165e+06	374184	1.56679e+06	1.32698e+06	22713.9	8610.41	2.06695e+06	335361	1.57169e+06	887900	1.77012	0.215772	4.1532
M283T215	283.08175	215.2520	nodiff									59394.3	162005	35492.3	38295	572987	50692.5	9549.36	20979.4	11140.2	10984.7	14896.6	12280	153144	13305	11.5102	0.135685	2.0154
M626T184	626.34583	184.1625	diff									19056.8	20001.1	28872.9	20604.7	19154.3	20075.7	41823.2	40312.9	344178	210223	40527.3	147687	21294.3	137459	0.154914	0.0438648	2.27256
M283T342	283.11331	341.8980	diff									389052	216121	319696	352568	669562	356511	104295	139853	64208.8	70354.1	280862	121203	383918	130129	2.95028	0.00465743	2.91372
M89T247	89.02415	247.2760	nodiff									1.92193e+06	1.61898e+06	2.15935e+06	630330	1.31138e+06	780586	2.39945e+06	2.63983e+06	2.03863e+06	2.25693e+06	2.37897e+06	997568	1.40376e+06	2.11856e+06	0.6626	0.0654145	5.27045
M80T289_2	79.95698	288.8200	nodiff									837228	853896	1.19833e+06	706649	813109	813191	1.31101e+06	1.30523e+06	900172	400896	1.42875e+06	1.08567e+06	870401	1.07196e+06	0.811974	0.261671	2.88685
M62T664	61.98859	663.7115	nodiff									1.58045e+06	307641	349504	303003	277963	60585.6	447128	313546	344000	360306	495480	324166	479858	380771	1.26023	0.670445	0.56557
M280T31	279.99508	31.0565	nodiff									188969	301809	53094.6	64096.2	77525.5	81457.3	135017	192412	75310.7	88116.4	54635.1	49272	127825	99127.2	1.28951	0.546676	0.421646
M861T188	860.53582	188.1625	nodiff									373309	281328	270915	358495	197516	216499	296942	310202	71306.2	54206.4	306360	136319	283010	195889	1.44475	0.162916	1.38889
M371T176	371.20677	176.2520	nodiff									3500.83	3862.11	3014.36	2410.59	1429.42	1159.12	124390	83254.3	8947.17	20614.2	386399	54700.3	2562.74	113051	0.0226689	0.0827149	1.82112
M237T50	237.18509	49.6495	diff									16567.1	8972.67	24222.8	33469.3	13665.1	28008.9	109118	289174	230371	249077	538121	140748	20817.6	259435	0.0802422	0.00333405	3.02364
M753T141	752.55941	141.0660	nodiff									684934	1.09214e+06	998141	742096	893912	802640	947773	849365	483491	286299	794044	728781	868977	681625	1.27486	0.149037	1.92096
M189T363	188.93900	363.4645	nodiff									1.93561e+06	2.35205e+06	1.89208e+06	2.15459e+06	2.94673e+06	2.01811e+06	2.38966e+06	2.67099e+06	3.13047e+06	3.18155e+06	2.0971e+06	2.63098e+06	2.21653e+06	2.68346e+06	0.825997	0.0752385	4.63008
M374T36	374.24408	35.6835	diff									97249	127545	127249	82470.1	113793	199132	67534.8	71165.1	40731.4	29366.8	28700.6	49217	124573	47786	2.6069	0.00175358	1.6076
M560T32	560.43455	31.9800	diff									49662.4	74258.7	259009	231877	32387.5	200382	72198.8	50559.3	29726.6	15082.6	48548.6	49475.7	141263	44265.3	3.19127	0.0424381	1.59835
M195T416	194.92763	416.0565	diff									372583	470541	301314	380443	519911	307430	370359	284266	189655	164821	346905	239221	392037	265871	1.47454	0.0284614	1.94915
M321T27	321.04340	27.1270	diff									89913.1	36869.5	32672.4	9611.01	15092.9	17153.3	268972	332246	167099	356935	375672	275775	33552	296117	0.113307	1.37815e-05	3.25357
M686T176	685.52979	176.1750	diff									299524	239719	316767	334233	257722	276459	534655	563079	333527	201638	497519	446343	287404	429460	0.669222	0.0346587	2.46485
M189T348	188.93903	348.0205	nodiff									512307	653932	654580	656039	615933	648710	641159	662796	735481	1.15301e+06	634210	730750	623584	759568	0.820971	0.136244	2.77113
M223T49	222.99106	48.7075	diff									23110.5	12524.9	3929.32	17321.3	63336.4	2621.02	830927	922353	443130	322408	906482	652563	20473.9	679644	0.0301245	8.01638e-05	5.30759
M846T142	845.61082	142.2870	diff									428245	506264	398882	454046	455076	471262	322191	272684	126164	106785	340354	167270	452296	222575	2.03211	0.000407341	2.94745
M385T26_2	385.04961	25.6460	nodiff									7219.15	11600.5	2042.48	5281.58	217799	7669.91	1664.47	2497.75	6004.43	6564.29	2940.14	1780.44	41935.4	3575.26	11.7293	0.301464	1.02206
M237T34_3	237.18545	33.6300	diff									14839.3	18468.3	35157.2	29886.5	11117	23040.5	78071.8	96419.1	72333.8	74675.5	307465	75339.7	22084.8	117384	0.188141	0.0323187	1.78574
M255T33	255.01897	32.5940	nodiff									1515.24	91773.1	524.487	1326.08	6711.1	1918.65	35600.5	38754.5	990.462	6957.48	33341.4	23053.2	17294.8	23116.2	0.748165	0.727844	0.268141
M884T114	883.53686	114.2245	diff									1.147e+06	1.15599e+06	982647	1.03531e+06	1.01655e+06	1.40822e+06	686710	787039	694225	842575	612631	1.05882e+06	1.12429e+06	780333	1.44078	0.00356202	2.90625
M532T185	532.34058	185.3900	nodiff									222283	192922	1500.34	42885.8	171102	213893	367987	394934	39137.1	34505.5	439721	33560.5	140764	218307	0.644799	0.413014	1.71236
M111T36	110.97487	35.6930	nodiff									96692.6	153237	96949.2	120306	445140	37400.2	57055.4	74463.9	35102.4	18549.2	38280	39696.1	158287	43857.8	3.6091	0.0853545	1.83406
M386T164	386.22960	164.3455	nodiff									6250.54	4492.43	10649	9767.44	7935.51	5933.22	76754.4	43336.3	4622.07	20558.7	325705	38071.1	7504.69	84841.3	0.0884557	0.146971	1.45203
M245T194	245.01157	194.4240	nodiff									8632.78	8560.06	5236.36	8663.12	31696.5	10641.6	2893.98	19857.5	3858.48	1521	4030.96	2636.72	12238.4	5799.78	2.11015	0.215362	0.461516
M220T684	220.14664	684.2780	nodiff									890171	497786	588780	612235	554269	475564	482614	493907	414671	621130	502650	104437	603134	436568	1.38154	0.107959	1.47499
M765T54	764.55004	54.0935	diff									27447.3	13372	91341.8	25522.5	12221.7	21223.9	164016	175583	133968	90003	90002.8	170120	31854.9	137282	0.23204	0.000383035	2.13254
M345T354	345.01489	353.9670	diff									1.05048e+06	1.00384e+06	953735	1.08791e+06	1.08387e+06	1.05478e+06	999445	1.06622e+06	227252	100829	970965	540484	1.0391e+06	650866	1.59649	0.0492905	3.7301
M345T350	344.95779	350.1330	nodiff									1791.93	5405.63	5651.65	1818.97	1.02218e+06	2579.69	6705.3	4939.2	2907.54	2395.82	3393.75	3472.32	173237	3968.99	43.6477	0.342312	2.22357
M773T143	772.58240	142.9085	diff									429771	414326	431786	411527	330260	503194	227284	206736	127594	120532	266649	191291	420144	190014	2.21112	3.32324e-05	2.88808
M81T29	80.96460	28.8855	diff									198382	223428	69941.5	171422	559128	134437	50533.2	64755.9	61815.9	45367.6	42088.6	35968.6	226123	50088.3	4.51449	0.0311553	2.31877
M752T139_1	751.54853	138.6400	nodiff									348167	582228	513625	407919	574073	414879	679808	555216	314424	236507	573534	464009	473482	470583	1.00616	0.971493	1.20385
M271T289	271.00358	288.6220	nodiff									633925	623029	582163	572135	814617	632995	524363	612835	603521	620261	603058	581570	643144	590935	1.08835	0.207022	0.832098
M242T35	242.17554	35.0750	diff									5630.77	55627.6	43114.4	60944	25273.6	93478	13332.9	12221.2	7602.39	14050.4	21318.9	18757.1	47344.7	14547.1	3.25457	0.026147	1.00003
M241T62	241.18049	61.9510	nodiff									302827	187674	162447	391980	61515.9	71797.3	148124	252872	375697	404078	198935	237336	196373	269507	0.728639	0.301088	2.11602
M91T35	91.02149	35.0730	nodiff									143153	109788	127445	156991	124294	137836	179890	181697	90722.8	75064	121106	121107	133251	128264	1.03888	0.801649	0.254569
M215T63	215.00137	62.6190	nodiff									56010.6	94592.2	23884.2	108039	2.7577e+06	29599.3	9923.28	12428.7	9930.9	9981.63	8539.57	12463.9	511638	10544.7	48.521	0.290944	3.79553
M616T33	616.46116	32.5940	nodiff									55024.5	95708.8	264182	288177	36066.7	207992	171310	125269	56206.5	15048.9	74605.9	106294	157859	91455.7	1.72607	0.21417	1.07897
M220T707	220.14657	706.8910	nodiff									823849	470895	456621	426439	1.39714e+06	783104	655098	170176	612559	512633	351879	294536	726342	432813	1.67819	0.116113	2.00207
M313T34_1	313.07778	34.4620	nodiff									109220	105322	102823	128896	104733	148464	140461	132976	79098.8	59904.9	101225	109628	116576	103882	1.1222	0.406978	0.31423
M304T171_1	304.06361	171.2220	nodiff									4077.31	210813	883506	5857.78	2987.69	101667	13901.4	23409.4	20996.9	8056.72	13790.1	16241.3	201485	16066	12.5411	0.21627	1.6509
M220T660	220.14650	660.1620	nodiff									465794	437497	193909	798422	849320	427249	384420	129740	474267	599762	740393	274790	528698	433895	1.21849	0.501135	0.482248
M196T111	196.01071	110.8560	diff									1.0588e+06	1.32581e+06	1.66931e+06	23981.1	750624	104490	137773	49126.2	196863	93250.5	5246.35	613799	822168	182676	4.50068	0.0484293	3.31821
M557T40	557.45602	40.4890	nodiff									101432	60010.7	84828.9	96586.3	50160.9	47008.2	128333	204907	105470	35488.8	92894	107489	73337.8	112430	0.652297	0.142074	1.11843
M271T280	270.97522	280.0150	nodiff									19147.7	47039.4	26450.6	8069.84	72948.3	14304.9	19614.5	14329.4	8098.73	11268.8	13047	28540	31326.8	15816.4	1.98065	0.166931	0.568633
M559T40	559.47090	40.0210	diff									95598.1	59423.4	95765.4	90554.4	50932.1	113488	174236	260834	132914	69908.1	101862	178397	84293.6	153025	0.550848	0.0402187	1.51737
M301T35_1	301.02611	35.3455	nodiff									8573.3	156555	12372.6	113647	340332	87746.3	75880.2	100073	65632.4	6520.57	93791.8	70915	119871	68802.1	1.74226	0.347474	1.3984
M301T32	300.98527	31.9510	nodiff									92328.7	126358	49466	110242	293234	62576.2	64490.4	100215	78134.6	56339.6	99188.1	74661	122367	78838.1	1.55213	0.264908	1.02539
M301T29	301.01232	29.1390	nodiff									45466.2	10182.6	41392.5	9245.4	135597	6271.2	2488.06	3559.48	6136.28	3305.68	3330.57	2527.81	41359.2	3557.98	11.6243	0.0896642	0.940561
M155T577	154.94752	577.2165	nodiff									4.1894e+06	3.8859e+06	4.49764e+06	4.41397e+06	3.87549e+06	4.2575e+06	4.48245e+06	3.82676e+06	4.49229e+06	3.7462e+06	4.67466e+06	3.64869e+06	4.18665e+06	4.14518e+06	1.01001	0.849585	4.01101
M387T354	387.02509	353.9670	diff									671564	615141	588416	733702	714020	683300	604529	654213	76276.5	31775.3	575759	239290	667691	363640	1.83613	0.0266606	3.38066
M124T322	124.00681	321.5250	nodiff									254119	206904	265536	226719	406860	186571	264606	302229	241211	293943	305816	277535	257785	280890	0.917743	0.508228	0.991395
M201T229	201.05709	229.1860	nodiff									267829	481348	254939	293474	157220	618567	374163	457627	220972	139299	276817	308779	345563	296276	1.16635	0.567376	0.683344
M129T60_2	129.05525	59.7680	nodiff									443968	361480	149329	537229	357769	255486	225700	273412	234137	176004	357929	321915	350877	264849	1.32482	0.195981	0.935882
M129T72	129.09151	71.6835	nodiff									83206.1	271125	84365.9	542186	80311.4	602596	84265.7	62325.7	53046.3	216770	370763	81304	277299	144746	1.91576	0.259514	1.61965
M753T39	752.51410	39.3560	nodiff									24700.2	20564.4	35549.9	24760.4	19611.4	30432.2	17451.5	18010.7	7707.29	6096.36	12784.3	16656.8	25936.4	13117.8	1.97719	0.00279695	0.619482
M619T238	619.28876	238.3780	nodiff									105604	70335.3	91124.8	118527	59692.6	84299	208635	252216	89921.2	46408.4	187127	113335	88263.7	149607	0.589971	0.0955237	1.42961
M332T37	332.18821	36.9220	diff									108741	49906.6	60209.3	144847	15230	92328.4	14163.3	17493.7	10615.1	10197.1	24617.4	11232.1	78543.7	14719.8	5.33592	0.00723052	1.41564
M186T221_1	186.04523	221.4025	nodiff									787937	531222	803811	578550	573009	716906	885445	987388	324799	57117.6	932197	642310	665239	638209	1.04235	0.869909	1.63994
M80T416_2	79.95693	416.1825	nodiff									212826	261444	189648	197283	327476	153436	189730	219314	140360	121168	204622	168535	223685	173955	1.28588	0.123945	1.00111
M576T31	576.45324	31.3790	nodiff									18609	24683.6	85799.7	91517.7	20910.6	88061	39877.3	38045.4	16868.9	9456.97	26993.1	40097.2	54930.2	28556.5	1.92357	0.129312	0.738602
M771T127	770.57216	127.2170	diff									998613	769377	808962	918240	840965	1.37237e+06	542961	443070	19161.3	6110.65	581964	131816	951421	287514	3.30913	0.000837312	4.99328
M143T106	143.10722	106.3520	diff									777018	506762	605095	799182	882881	1.30568e+06	484033	545945	498911	507494	408403	410875	812770	475944	1.7077	0.0155131	2.87343
M62T104	61.98833	104.4850	nodiff									734845	1.39291e+06	973184	1.13649e+06	771574	1.20174e+06	1.22344e+06	1.1047e+06	1.41166e+06	1.40148e+06	881287	1.49023e+06	1.03512e+06	1.25213e+06	0.826688	0.154062	3.5098
M182T282	182.03188	282.4065	nodiff									1.81725e+06	1.83998e+06	1.7621e+06	539166	1.52621e+06	533014	750072	2.11686e+06	1.65533e+06	698098	1.50671e+06	2.10636e+06	1.33629e+06	1.47224e+06	0.907658	0.715949	2.31628
M603T187	603.34815	187.0730	nodiff									12558	59925.1	8699.6	74342.1	10787.2	16822.6	14752	20280.1	196428	149185	18870.8	135206	30522.4	89120.3	0.342486	0.124399	1.66587
M885T110	884.53983	109.7810	nodiff									563895	1.27325e+06	456112	635068	704990	597010	877809	341458	92948.2	358190	313072	208580	705054	365343	1.92984	0.0622176	2.94504
M253T62	253.18034	62.1840	diff									17494.7	3699.42	11604.5	12571.7	4819.45	6841.1	30144.3	86283.9	27536.8	39737.6	176557	33130.8	9505.15	65565.2	0.144973	0.0417724	1.35867
M125T172	124.99071	171.7830	nodiff									707292	850006	279834	689931	2.21417e+06	538779	577226	1.2998e+06	894473	285477	1.2659e+06	796124	880002	853166	1.03146	0.935079	2.86752
M165T266_2	165.03350	266.2575	diff									183201	144738	125019	155710	298609	157166	399809	566799	476481	319244	449772	312488	177407	420766	0.421629	0.000435514	3.26234
M220T10	220.14668	9.5640	nodiff									2.10991e+06	1.93772e+06	2.47896e+06	2.36062e+06	2.40724e+06	348331	783872	2.50005e+06	2.37707e+06	2.13833e+06	2.0649e+06	773920	1.94046e+06	1.77302e+06	1.09444	0.7232	1.87953
M774T39	773.53522	38.8120	nodiff									54195.6	53187.4	100873	58115.9	38227.9	44783.4	53571.3	55641.3	16956.2	6543.56	25835	39361.2	58230.6	32984.8	1.76538	0.0643628	0.694816
M369T354	368.97606	354.1430	nodiff									1.04199e+06	1.05666e+06	998081	1.08018e+06	1.05118e+06	1.06798e+06	1.01028e+06	1.072e+06	379358	190380	1.01116e+06	733380	1.04934e+06	732759	1.43204	0.0638321	3.18674
M313T380	313.11242	379.5280	nodiff									417203	234193	501838	347350	112643	309202	578384	611408	184703	66329.2	544944	348770	320405	389090	0.823473	0.539611	1.2409
M132T29	132.04490	29.4285	diff									84559	122641	38707.3	100784	319645	92102.6	35949.6	46460.1	40110.4	28827.4	29440.6	22528.9	126407	33886.2	3.73033	0.0450797	1.68629
M557T63	557.45730	62.9905	diff									67714.9	22326.6	69931.4	59969.1	28530.7	13294.5	147717	211732	306952	230929	154943	199122	43627.9	208566	0.20918	7.95066e-05	2.75546
M155T539	154.94759	539.3430	nodiff									469427	451403	430380	501244	413854	318628	488486	178299	392267	403272	482704	266688	430823	368619	1.16875	0.296087	0.883707
M233T29	233.01192	28.9000	nodiff									126925	139424	43592.5	65237.3	337763	56292	31222.4	247972	180263	35775.1	23250.3	12716.1	128206	88533.1	1.44811	0.527603	0.782185
M561T40	561.48719	39.9240	nodiff									73219.4	51506.3	64133.1	61786.4	37411.2	34017.3	92877.6	164902	88522.9	26402.4	64433.8	100253	53678.9	89565.3	0.599327	0.0984264	1.08855
M457T106	457.33098	106.3270	diff									415903	98703.8	180377	320644	337357	122032	29987	20447.2	16784.8	12176.3	31345.9	23446.3	245836	22364.6	10.9922	0.00179322	2.61455
M286T346	286.05960	345.5755	nodiff									64155.9	64448.5	180901	42887.3	62125.5	64623.9	106676	127276	227875	45741.1	136613	129707	79857	128981	0.619137	0.1506	1.3538
M763T107	762.50828	106.9745	nodiff									124938	155750	538785	165958	201600	257628	262707	262438	1644.41	1268.36	288767	2100.57	240777	136488	1.76409	0.257598	1.36701
M493T354	492.98976	353.9670	diff									726545	672952	640870	727562	746095	709418	663463	715014	123255	49430.5	648125	346422	703907	424285	1.65904	0.0429755	3.1918
M229T363	228.93159	362.9325	nodiff									1.30676e+06	1.3879e+06	968890	1.36912e+06	987531	989053	1.36904e+06	978282	1.86017e+06	1.70886e+06	1.30846e+06	982633	1.16821e+06	1.36791e+06	0.854012	0.269304	3.60192
M263T354	263.01176	354.0395	diff									778027	752412	716832	818089	789546	780783	723293	776375	186366	91664.4	690907	413012	772615	480269	1.60871	0.0362641	3.20989
M462T183	462.29805	183.3655	diff									199845	150693	175822	73139.9	149142	112791	78942.4	88179.8	18400.9	22123.2	73157.5	28363	143572	51527.8	2.78631	0.00220944	1.66401
M581T179	581.44023	179.1325	nodiff									3226.07	7225.07	4365.2	2231.11	6424.84	8586.05	16419.6	14123.1	113846	83327.1	20291.6	5882.43	5343.06	42315	0.126269	0.0716573	1.22484
M299T341	299.08743	341.2870	diff									199138	136167	216050	164219	324598	139001	94638.1	135688	59158	39568.3	160181	91958.7	196529	96865.4	2.02889	0.0153971	1.73956
M533T40	533.45519	40.0130	diff									52514.3	33903.5	44321.1	34141.5	19442.4	114694	126978	197671	117929	49928.9	60661	101061	49836.1	109038	0.457052	0.0440198	1.30237
M125T156	124.99070	156.4470	nodiff									275535	318952	164258	266764	800876	137540	363119	461280	1.15414e+06	253099	494049	442314	327321	528000	0.619925	0.247526	2.30333
M575T354	574.99296	353.9670	diff									570755	543890	511017	582704	599836	582181	525700	573352	74271	26277.1	501514	239225	565064	323390	1.74731	0.0357082	2.99837
M744T124	743.54473	124.2375	nodiff									156664	1.01092e+06	836260	817425	873981	638839	864455	102469	12130.2	5815.6	841035	157868	722348	330629	2.18477	0.0881578	3.45288
M449T37	449.29321	36.8970	diff									41307	21529	37831.6	32469	9650.06	9358.66	283514	410363	214404	114817	243180	241397	25357.6	251279	0.100914	0.000203982	3.10178
M215T295	215.03222	295.2410	nodiff									402443	591121	615304	425559	159380	488877	665658	637052	414090	239565	682909	535949	447114	529204	0.844881	0.420989	1.41697
M791T85	790.54102	84.5610	nodiff									335736	379645	527187	335907	378443	1.25429e+06	406339	546888	4391.03	3412.15	408264	4689.95	535202	228997	2.33715	0.118019	2.86349
M791T106	790.54013	106.1850	nodiff									435618	727624	528384	460517	428249	3.00833e+06	531998	547394	8750.26	5549.88	702013	678729	931453	412406	2.25858	0.26335	3.25706
M217T274	217.00316	274.3620	nodiff									2.89285e+06	1.91696e+06	1.54077e+06	1.81543e+06	1.80889e+06	2.8477e+06	2.0184e+06	1.6103e+06	3.01074e+06	1.89239e+06	2.78888e+06	1.25392e+06	2.1371e+06	2.09577e+06	1.01972	0.912131	2.29353
M287T355	286.97316	355.2340	nodiff									1.15573e+06	1.03747e+06	1.11442e+06	1.16474e+06	1.12106e+06	1.15843e+06	1.14417e+06	1.09798e+06	560890	342002	1.08941e+06	926926	1.12531e+06	860231	1.30815	0.0819232	2.62736
M397T25	397.00210	25.2295	nodiff									49053.6	35998.6	29463.2	9034.85	82243.3	48991.7	13161	16440.1	15562.1	17331.5	12031.5	16955.7	42464.2	15247	2.78509	0.0218363	0.828694
M242T62_1	242.04871	61.9710	nodiff									58595.2	538922	94586	72340.7	944280	83798.4	33413.4	55958.2	85411.9	56783.9	92986.3	48817.1	298754	62228.5	4.80092	0.145584	2.46499
M343T43	343.19109	43.2950	nodiff									4596.86	4874.66	2188.86	7057.85	7596.54	89505.3	90124	102804	65760.6	27627.8	4778.72	1197.95	19303.3	48715.4	0.396247	0.224716	0.613139
M207T34_2	207.01157	33.8415	nodiff									13399.5	1106.09	7776.53	22560.9	13416	39880.9	18922.7	50319.5	31491.8	27908.8	119504	14039.3	16356.7	43697.7	0.374314	0.137373	0.830268
M817T125	816.57745	124.5820	nodiff									461764	476139	202929	705686	594421	770957	781210	443007	43594.7	21330.3	469322	192724	535316	325198	1.64612	0.18058	2.81008
M295T362	294.90311	362.3550	nodiff									1.04308e+06	936651	1.0454e+06	869218	1.037e+06	1.03072e+06	1.1925e+06	914514	1.4881e+06	1.33945e+06	845149	1.14534e+06	993678	1.15418e+06	0.860943	0.15548	3.35044
M244T31	244.02766	31.3770	nodiff									112067	170089	30012.8	60691.2	35569	23104.3	40267.3	189603	187640	71939.5	54351.7	28381.9	71922.2	95364	0.754186	0.554063	0.7647
M152T189	152.00135	188.7930	nodiff									62956.8	57100.2	44077.7	38277.4	125447	14627.9	37082.2	70773.9	40223.3	23379.1	13781.2	25527.9	57081.2	35127.9	1.62495	0.234181	0.619151
M223T39	223.17021	39.1000	nodiff									92421.1	45917.7	44922.8	125004	41124.7	143137	55601.9	71456.4	63680.6	51004.3	96308.3	68100.3	82087.8	67692	1.21267	0.475621	0.395045
M109T17	109.00378	16.7840	nodiff									107106	100023	120141	113406	88181.5	82450	105424	181981	114463	192282	96083.3	247355	101885	156265	0.652	0.0574974	1.49713
M229T348	228.93162	347.6940	nodiff									295314	338265	332001	309548	308828	321494	335372	326284	360302	590409	317256	422731	317575	392059	0.810018	0.114615	2.0399
M285T47_4	285.26933	46.6560	nodiff									336030	143424	120910	282258	95455.3	133504	115475	232699	202755	183194	123255	198218	185263	175933	1.05304	0.838513	0.945633
M267T46	267.23236	46.4125	diff									93002.8	69921.6	83038.6	69068.7	43069.6	124308	277764	410988	299564	216984	303232	203068	80401.6	285267	0.281847	8.69383e-05	2.98204
M200T162	200.05596	161.9090	nodiff									266326	284981	574870	197982	238598	190953	279267	345550	197199	106418	316703	255524	292285	250110	1.16863	0.551474	0.107623
M200T165	200.12840	165.0490	nodiff									18960.1	13816.8	572743	21354.8	6658.33	25239.6	35200.4	30329.5	22338.3	31745.1	65732.5	27305.1	109795	35441.8	3.09791	0.441822	0.833966
M77T705	76.96985	705.4240	nodiff									257906	335597	233746	1.07477e+06	294742	257572	277912	179230	387049	359469	287423	296182	409055	297878	1.37323	0.436522	1.26162
M205T357	204.97023	357.3675	nodiff									1.11891e+06	1.16997e+06	1.23504e+06	1.25232e+06	1.23351e+06	1.13398e+06	1.27463e+06	1.12398e+06	773581	198225	1.21038e+06	1.14259e+06	1.19062e+06	953896	1.24817	0.190668	2.23289
M590T31	590.46795	31.3875	nodiff									16307	19466.8	54573.4	65245.1	13981.2	6186.72	30932.2	26731.9	11298.5	6104.66	23341.5	27383.5	29293.4	20965.4	1.39723	0.455942	0.220242
M77T680	76.96997	679.9500	nodiff									396049	345864	395081	366675	342914	572969	346687	68902.5	620360	438641	350333	371420	403259	366057	1.10163	0.655254	1.74187
M73T379	72.99273	379.2800	nodiff									6944.84	9416.16	250779	5807.56	14844.2	5402.26	10840.9	6461.96	3628.27	4512.91	11481.7	7627.77	48865.7	7425.6	6.58072	0.329515	0.642053
M798T173	797.65485	173.4265	nodiff									246863	207597	290864	289153	235320	273192	476743	501084	88483.8	68838.5	489598	346677	257165	328571	0.782677	0.411796	1.63279
M77T582	76.96985	582.1355	nodiff									1.11635e+06	2.08946e+06	1.57668e+06	1.58451e+06	1.24206e+06	1.58428e+06	970028	1.98774e+06	1.05875e+06	1.57551e+06	2.29626e+06	1.50445e+06	1.53222e+06	1.56546e+06	0.978771	0.897629	1.53016
M770T142	769.55731	141.6935	diff									327693	226870	358472	267088	277858	266497	187617	245128	128688	119685	217620	187569	287413	181051	1.58747	0.00339992	1.67328
M791T64	790.54023	64.3050	diff									242749	178958	452992	285937	281984	671188	198212	389420	6398.88	3799.48	76362.1	6616.18	352301	113468	3.10485	0.0336934	2.65109
M155T519	154.94759	518.6260	nodiff									952232	300577	459448	114290	279296	289530	298234	368991	235787	248707	297901	52888.6	399229	250418	1.59425	0.268809	1.06388
M510T184	510.25202	184.0845	nodiff									13383.1	222668	288403	51856.7	12481.7	36506.9	224243	221652	172783	2429.91	5301.3	179256	104217	134278	0.776127	0.651662	0.666241
M884T147	883.53568	146.5500	diff									356488	485415	411509	420215	425097	331029	307474	306728	136032	57039.2	274434	273505	404959	225869	1.79289	0.00394695	2.42464
M870T139	869.61069	138.6290	diff									139111	229900	279768	135652	173736	246062	107606	114105	78021.1	50119.9	106226	93464.3	200705	91590.5	2.19133	0.00199886	1.82363
M271T360	270.94168	360.2715	nodiff									1.1285e+06	752192	689650	1.13813e+06	1.13405e+06	766811	728347	1.16073e+06	348641	254274	725145	1.10795e+06	934888	720847	1.29693	0.254372	2.06298
M535T40	535.47100	39.9655	diff									41742.7	22526.2	32729.6	44002.6	18381.3	24353.7	78142.8	150343	62260.4	20245.5	50901.6	90791.4	30622.7	75447.4	0.405881	0.0356627	1.22241
M197T54	197.15427	53.5210	nodiff									69840.8	39572	51069.6	78823.1	29367.1	183657	72808.2	112080	135262	127311	103287	81037.4	75388.2	105298	0.715954	0.260137	1.04466
M451T354	450.97894	354.0895	nodiff									687576	680465	647133	709444	695045	689248	670548	684062	186512	85114	645234	419961	684819	448572	1.52666	0.0527893	2.83986
M99T24	98.94917	23.9620	nodiff									13175.2	15886.2	7891.53	19244.4	11411.5	24139.2	20147.3	17464.4	9754.3	11636.4	12541.1	14094.3	15291.4	14273	1.07135	0.728265	0.0793146
M341T49	341.21142	48.5780	nodiff									77264.1	18528.2	26235.7	50967.7	87217.1	40094.2	30166.6	47919.5	56579.9	26778.5	31623.4	27925.6	50051.1	36832.2	1.35889	0.3082	0.273085
M847T142	846.61705	142.3080	diff									300545	222647	287499	237400	173861	416682	85265.9	202908	102594	60600.4	186462	158735	273106	132761	2.05712	0.00714738	1.96915
M517T189	517.25392	188.8395	nodiff									9078.55	16215.7	8788.92	128581	41444.3	149580	10933.1	35184.3	14943.5	13697.7	27359.6	13323.6	58948.1	19240.3	3.06379	0.1613	0.976073
M220T46	220.14630	46.0460	nodiff									615221	572157	643923	608497	680263	413646	617711	569568	585988	692096	530812	610801	588951	601163	0.979687	0.787343	1.64808
M533T187	533.30180	186.5710	nodiff									119959	121189	109912	147841	142166	126585	108619	160868	11620.3	11937.7	120048	44461.6	127942	76259.1	1.67773	0.0761419	1.39278
M429T162	429.09514	161.9970	nodiff									222851	290053	578693	206871	136877	220295	351681	403512	260996	133722	410018	322402	275940	313722	0.879569	0.632388	1.05741
M211T29	211.34159	29.4755	diff									74096.7	101250	35001.9	76868.6	245789	69386.6	25961.3	32034.8	27270.4	24032.9	21573.7	17981.4	100399	24809.1	4.04685	0.0322208	1.52892
M186T244_1	186.04514	244.2135	diff									402255	84067	420397	307622	324639	225475	732581	771305	1.21733e+06	711519	754520	741991	294076	821542	0.357956	0.000232538	4.92233
M239T78	239.16479	77.5670	nodiff									431019	290817	213868	476962	110685	566729	214354	395045	247313	97606.6	471468	214075	348347	273310	1.27455	0.422565	0.835252
M220T68	220.14643	67.9985	nodiff									1.07768e+06	780037	1.02355e+06	1.08957e+06	1.28346e+06	406494	1.04243e+06	1.08423e+06	753215	1.01269e+06	1.31123e+06	989691	943464	1.03225e+06	0.913989	0.55595	1.93674
M453T182	453.21186	181.7070	nodiff									1214.61	897.363	9681.78	418.946	1233.06	626.391	689.488	1004.96	657.598	862.98	537.104	846.367	2345.36	766.416	3.06016	0.309479	0.12939
M211T25	210.99363	25.2100	nodiff									25819	39218.4	10343.3	28367.9	143162	31939.6	9140.7	13881.3	14918.7	12055.7	8122.93	7941.99	46475	11010.2	4.22107	0.102981	0.993568
M97T182	97.00383	181.9160	diff									176350	245737	150413	187410	384163	154945	109047	118453	30907.2	13366.2	120881	75283.7	216503	77989.5	2.77605	0.00701866	2.29625
M727T143	726.54046	142.8050	nodiff									207040	190471	146430	211594	165275	121404	346120	228017	147243	157325	367201	228181	173702	245681	0.707023	0.106335	1.57471
M727T147	726.51181	147.1880	nodiff									171415	57863.7	117594	103664	91947.8	63310.6	18827.7	21659.5	76350.8	91032	184800	28035.2	100966	70117.5	1.43995	0.344362	0.419967
M538T36	537.50601	36.2750	nodiff									30169.4	76204.8	55013.1	33311.5	31212.9	140280	31185.4	50963.2	32606.3	15770.6	19816.4	40143	61032	31747.5	1.92242	0.139716	0.794024
M349T27	349.00163	26.9500	nodiff									25371.4	12192.7	9117.14	30376.9	13169	5222.15	9025.85	1203.86	1545.73	3092.58	3822.3	1775.02	15908.2	3410.89	4.66395	0.0135233	0.582898
M745T128	744.55370	127.9715	nodiff									752845	774585	657254	724867	611341	937183	800924	691926	30000.3	9850.93	928204	170605	743013	438585	1.69411	0.113048	3.17588
M249T51	249.18469	51.0800	diff									55712.2	29522.6	33941.4	25580.7	21244	62009.6	90534.9	154123	148380	76814.1	64090.3	149001	38001.7	113824	0.333864	0.00187733	1.77228
M561T186	561.33302	186.2340	nodiff									188055	213131	256288	204111	183231	206007	204417	218455	48493.8	10562.3	219825	55943.1	208471	126283	1.65082	0.0745152	1.5688
M271T39	271.22686	39.4620	nodiff									105238	57551.6	53576.4	85116.5	22687.4	62681.7	87707	123317	30168.7	17706.1	89836	80831	64475.2	71594.4	0.900562	0.729016	0.376113
M166T33	165.98903	33.2060	nodiff									74486.7	6567.17	67495.4	6810.79	56884.5	9837.97	94226.5	10828	111380	93291.2	56309.8	11483.1	37013.8	62919.8	0.588269	0.272953	0.97585
M222T36	222.33311	35.6925	nodiff									114060	117639	116962	95240.5	92481.6	109514	107563	113178	89766.5	77215.1	84125.4	108372	107650	96703.4	1.11319	0.179658	0.456148
M298T32	297.98167	31.9080	nodiff									2192.2	1490.83	78506.3	87293.6	4935.92	9827.21	2432.72	2564.93	58468.1	3503.29	1334.04	70032.6	30707.7	23055.9	1.33188	0.724983	0.480045
M77T17	76.96985	17.4640	nodiff									362577	611148	669605	638685	334507	266533	556864	848152	948504	962883	378894	589955	480509	714209	0.672785	0.0843167	3.47137
M725T141	724.52516	141.0600	nodiff									235481	391824	321699	224914	222368	225705	380884	359275	269756	222450	329175	338436	270332	316663	0.85369	0.247109	1.35039
M173T577	172.95765	577.4290	nodiff									1.61764e+06	2.11093e+06	2.214e+06	1.45561e+06	2.24674e+06	2.24924e+06	2.20738e+06	2.08034e+06	2.2676e+06	2.17051e+06	1.42334e+06	1.1994e+06	1.98236e+06	1.89143e+06	1.04808	0.708394	2.26173
M120T104	119.97529	104.2650	nodiff									343995	163027	183604	276824	1.35806e+06	74504.6	75227.6	169963	189545	223621	88635	157889	400002	150814	2.6523	0.234142	2.12028
M75T35	74.99045	35.3780	nodiff									89457.4	60256.4	71415.5	77714.6	75671.8	51535.7	79000.1	91562.8	68861.9	50625	53360.9	71323.6	71008.6	69122.4	1.02729	0.826122	0.272205
M353T356	352.94440	356.1935	diff									870066	935156	871611	922284	913542	861653	895182	809026	500696	308018	761399	796152	895719	678412	1.32032	0.0412852	2.31343
M770T173	769.62349	173.3305	diff									61222	38809.2	56278	67107.9	47918.3	57957.2	349721	364824	88528.9	60228.7	370312	281780	54882.1	252566	0.217298	0.00672398	2.7302
M77T44	76.96969	43.6890	nodiff									297653	304704	330238	315064	315298	97101.4	249057	250446	303473	314919	268746	237108	276676	270625	1.02236	0.878064	1.0241
M175T416	174.93707	416.3955	nodiff									206241	243770	184519	198082	254882	142688	168186	157227	163806	104744	172569	164424	205030	155159	1.32142	0.0291269	0.835316
M179T40	179.10701	39.6805	nodiff									64720.7	50512.9	15694.9	36009.2	71216.7	25406.1	15880	22420.9	13397.4	7637.87	15660.4	23178.9	43926.8	16362.6	2.68458	0.0141567	0.886496
M332T41	332.26659	40.7650	nodiff									70188.1	96667.7	108309	51829.8	43587.6	62607.2	70330.2	75819.5	79116.8	56455.7	59051.4	72140.1	72198.2	68818.9	1.0491	0.765578	0.591401
M435T355	434.94756	354.6800	nodiff									692682	704393	664429	679790	695589	698012	687764	701069	268878	139622	684689	528525	689149	501758	1.37347	0.0880749	2.3937
M604T184	604.30529	183.5900	nodiff									121718	120102	201712	124885	84236.9	139651	184849	228092	34963.2	20688.2	192796	101874	132051	127210	1.03805	0.90386	0.640556
M533T354	532.98213	354.0395	diff									536519	515208	473471	530553	551132	532085	495499	525910	102580	41518.9	469674	279371	523161	319092	1.63953	0.040451	2.71741
M344T37	344.15259	37.4790	diff									101273	70470.6	107581	65658.7	79949.3	38610	190518	193523	97472.2	117701	217156	130098	77257	157745	0.48976	0.00491214	1.87251
M427T188	427.19569	187.8865	nodiff									37828.5	19760.2	4447.32	37879.6	101975	23335.3	6631.3	20530.3	2903.39	3702.15	2218.13	3185.54	37537.7	6528.46	5.74985	0.0532924	0.999667
M445T34	445.36765	33.8440	diff									41949.1	42285.6	63893.1	53214.5	33236	67040.5	23554.4	26548	12478.7	8802.4	18300.4	15209.4	50269.8	17482.2	2.87549	0.000320504	1.08045
M175T39	175.02413	39.0210	nodiff									15185.7	22681.1	11192.9	22597.5	98414.8	12767.3	10446.4	17126.1	5184.52	2077.88	11362.6	8342.24	30473.2	9089.95	3.35241	0.154914	0.831362
M377T26_1	377.06906	25.8520	nodiff									17533.4	11367.2	7097.43	4298.69	1695.01	1768.78	12684.2	35425.8	22277.3	6985.67	8129.92	7178.36	7293.41	15446.9	0.472161	0.154213	0.47777
M169T58	169.12278	58.4515	diff									33720.8	24256	31338	24812.3	13981.4	37902.8	77446.6	104484	72958.6	80519.1	266468	75020.8	27668.5	112816	0.245253	0.0214794	1.72438
M632T34	632.49244	34.4605	nodiff									24848.4	29422.8	99266.9	65495	26791.3	43063.4	49243.8	52679.3	14680.9	10650.2	21745.1	25300.1	48147.9	29049.9	1.65742	0.202014	0.523345
M557T80	557.45674	80.0570	diff									400220	71802.5	385343	153183	76328.7	113093	260278	649558	354589	237255	471636	531811	199995	417521	0.479006	0.0374651	3.01519
M763T123	762.50898	122.6850	nodiff									118283	170727	730543	168720	101477	161681	102470	350382	4393.6	3028.67	165357	197328	241905	137160	1.76367	0.372319	0.860268
M243T238	243.06169	237.8850	diff									152789	253911	118990	152335	316260	123186	133936	140486	56315.3	44628.9	149296	76449.1	186245	100185	1.85901	0.0463252	1.72478
M111T162	111.01941	161.9895	nodiff									216482	246615	449193	176336	206987	173682	242713	299309	169166	96495.2	283031	220562	244882	218546	1.12051	0.626099	0.104014
M698T145	698.48871	145.3360	diff									165554	59743.6	91841.9	129244	85551.1	66710.1	216253	153683	133767	156129	231544	152554	99774.2	173988	0.573454	0.00937677	1.72092
M699T143	698.50974	142.8050	nodiff									126415	120650	144700	130562	99497	36939.4	221768	152975	118520	128637	247670	144365	109794	168989	0.64971	0.051332	1.51553
M99T354	99.00586	354.2800	nodiff									746872	756751	733057	770525	738485	746274	757971	753966	491249	414392	718114	582741	748661	619739	1.20803	0.0569482	1.64685
M131T389_2	131.08222	388.8755	diff									432116	686801	483245	647033	775618	517876	259297	202247	165764	126892	254526	128476	590448	189534	3.11527	5.08987e-05	3.93958
M435T361	434.84916	361.0435	nodiff									10369.8	10223.6	2140.77	10618.9	11234.5	8761.21	11836.1	13116.5	630.946	8852.41	677111	10130.6	8891.48	120280	0.0739234	0.340898	1.58232
M99T347	98.95123	347.0850	nodiff									2527.75	3052.32	3689.13	290918	2456.45	2731.98	2141.72	2644.19	5575.52	164956	269683	203522	50895.9	108087	0.470879	0.422745	0.975515
M401T361_1	400.86683	361.4060	nodiff									619684	625435	706368	674839	678599	690080	647174	545081	933809	194848	675785	758461	665834	625860	1.06387	0.704144	0.395265
M220T96	220.14630	95.8890	nodiff									676250	798753	514994	985547	715740	587386	733035	590737	302024	1.92068e+06	496018	651014	713112	782252	0.911614	0.783666	2.45851
M796T172	795.63883	172.4260	nodiff									150206	106781	165610	182416	140841	148428	274615	325922	89358.6	55619.8	255018	215406	149047	202656	0.735466	0.261865	1.3628
M383T25	382.98646	25.3070	nodiff									20502.6	73742.5	13919.3	34620.6	47149.7	84617.6	15025.8	17454.5	36271.6	44194	17459.9	18505.7	45758.7	24818.6	1.84373	0.129588	0.664784
M335T363	334.89521	362.5465	nodiff									637393	478624	482268	658313	489650	644235	470829	494997	925625	790674	449664	707758	565081	639924	0.883043	0.417491	2.68151
M255T107_4	255.23210	106.6165	nodiff									419446	353247	323484	379076	349315	309902	308265	400520	207906	171907	320914	218009	355745	271254	1.31148	0.0542261	1.36136
M833T186_2	833.44771	185.5690	nodiff									6086.9	20037.5	3588.16	8237.17	22943.7	5479.05	7276.56	4289.12	1270.33	1422.03	6615.42	3375.65	11062.1	4041.52	2.73711	0.0747009	0.479256
M143T107_2	143.07048	106.5160	nodiff									12491.7	8051.16	11501.2	8667.06	8409.39	15036.4	10963.1	9088.61	15314.5	8724.25	9446.15	8497.57	10692.8	10339	1.03422	0.82462	0.216113
M89T295	89.02386	294.8925	nodiff									128571	125142	194627	128690	89981.2	447503	186203	204035	137723	110480	211116	173173	185752	170455	1.08974	0.791986	0.348897
M237T321	236.86097	320.9080	nodiff									309727	367959	394817	269579	407431	282694	394699	515862	179147	103813	439400	291179	338701	320683	1.05619	0.799468	1.36165
M251T61	251.16425	61.0470	nodiff									11662.5	14482.9	15543.9	18919.2	13365.9	29189.2	29814	55399.6	17387.1	16193	30760.4	16154.2	17193.9	27618	0.622562	0.151976	0.507569
M263T25	263.00145	24.7350	nodiff									71550.7	47871.6	37831	70660.8	55998.3	70658	70544.6	80226.4	60368	36131.3	74128.6	60949.1	59095.1	63724.7	0.92735	0.602043	0.373072
M539T36	538.51876	35.6970	nodiff									24822	42812.1	34194.8	22534.6	18319.4	112410	12664.7	18298.7	9581.2	4251.56	6759.71	13065.1	42515.5	10770.2	3.94753	0.0545005	0.93391
M77T65	76.96978	64.7320	diff									311289	334719	293918	317468	310269	88751.9	316522	317748	543187	534320	336416	440343	276069	414756	0.665618	0.0368849	2.61553
M99T416_2	98.95535	415.9960	nodiff									96198.9	113190	90366.8	92165.7	161383	72033.2	91734.2	103062	65462.2	52537.3	100462	70323.8	104223	80596.8	1.29314	0.151143	0.763581
M427T354	427.01731	354.0340	diff									388042	356946	333306	405631	406199	388872	353001	380501	68690.1	29466.2	336875	180306	379833	224806	1.6896	0.0353549	2.39239
M734T42	734.47923	42.3690	nodiff									59355.1	62809.5	23036	13030.1	15995.5	15609.7	56624.5	15775.6	19525.2	31192.1	16878	14212.8	31639.3	25701.4	1.23104	0.618023	0.22346
M363T168	363.07330	168.1370	diff									527446	704029	955265	662335	198465	514186	863214	1.00705e+06	1.15471e+06	885936	844149	789173	593621	924039	0.642419	0.0173676	4.19067
M235T287	235.08172	286.7130	nodiff									23893.2	168111	9020.32	41804.8	31805.1	195039	8369.41	9840.68	4246.26	2564.59	5814.51	5957.41	78278.8	6132.14	12.7653	0.0546244	1.46104
M253T27_1	253.01684	27.0540	nodiff									28960.9	36333.3	26935.2	28517.8	152075	11186.2	12114.2	13730.6	10524.7	6626.32	6786.66	3434.48	47334.8	8869.48	5.33681	0.100765	1.03309
M135T214	135.03044	213.7255	nodiff									74998.7	33321	54863.7	11207.4	25887.4	29686.8	11619.9	10551.1	11586	11282.9	11979.3	12469.8	38327.5	11581.5	3.30937	0.0167459	0.764938
M173T535	172.95772	535.4725	nodiff									206698	197483	124710	195134	198228	199703	210525	176118	291543	48256.1	206078	117288	186993	174968	1.06873	0.748524	0.155062
M303T140	303.23216	139.8755	nodiff									223031	270106	339014	221672	271386	175974	267186	239700	170080	128920	256258	204350	250197	211082	1.18531	0.246413	0.477539
M335T347	334.89550	347.4920	nodiff									155805	171817	171017	164014	168043	163828	173560	171328	183728	320531	169210	195577	165754	202322	0.819256	0.160133	1.41964
M355T41	355.26395	40.6230	nodiff									58595.3	56949.9	33497.5	41597.7	19561.5	38768.8	33569.9	30776.3	33852	36752.1	31702.3	28848.3	41495.1	32583.5	1.2735	0.175683	0.478437
M697T144	697.48022	143.6170	nodiff									336840	221885	176421	242754	252693	174549	193740	172524	201079	180302	168474	180831	234190	182825	1.28095	0.067132	0.737451
M74T185	74.02432	184.9660	nodiff									16653.9	23301	15528.4	23537.5	118861	18107.5	24444.9	34646.2	5550.57	9966.12	25157.7	13392.7	35998.2	18859.7	1.90874	0.343243	0.805886
M657T354	656.99705	353.9670	nodiff									308177	283327	260819	320092	313828	307695	284882	324204	28026.7	8169.74	274110	107003	298990	171066	1.7478	0.0516897	2.18571
M255T191	255.23229	190.6430	nodiff									215859	102673	225776	841427	196461	100239	244222	279300	184514	145787	248188	302825	280406	234139	1.1976	0.7007	0.359071
M143T10	143.10762	9.9630	nodiff									1.07412e+06	934638	1.08771e+06	1.07434e+06	1.09946e+06	1.14019e+06	948701	1.25621e+06	1.09274e+06	1.09266e+06	979374	989052	1.06841e+06	1.05979e+06	1.00813	0.877403	2.04705
M795T107	794.57046	106.9840	diff									275258	412987	360520	453155	299386	837775	197258	424209	6828.65	3528.75	192862	5127.77	439847	138302	3.18033	0.0195518	3.16726
M92T171	92.02493	170.6180	nodiff									81175.9	157159	381795	1214.23	83002.9	94306.7	1688.56	233693	1486.69	2860.65	167771	8048.71	133109	69258.1	1.92193	0.372938	0.723581
M299T37	299.02641	36.6015	nodiff									89709.5	85577	73285.8	31122.5	55221.9	85420.7	85987.8	94157.8	32963.8	63170.3	69018.4	75075.5	70056.2	70062.3	0.999914	0.999634	0.178964
M299T31	298.97855	31.3230	nodiff									24920.1	24301.9	18402.7	22379.9	6632.76	2426.03	24505.2	31479.3	875.097	1120.36	19210.9	21096.2	16510.6	16381.2	1.0079	0.984482	0.201411
M231T241	231.03491	241.4990	nodiff									95036.7	8789.28	37817.6	201597	16965.8	15838	24803.3	8747.98	35846.6	25044.4	41796	12703.7	62674.1	24823.7	2.52477	0.251143	0.730797
M251T189	251.16508	188.7590	nodiff									32181.5	16738.9	4337	31286.4	88251.8	17724.4	3951.57	12408.5	2036.92	2115.44	2606.42	1096.31	31753.3	4035.86	7.8678	0.046211	0.943719
M558T40	558.45949	39.9770	nodiff									46083.8	18783	37863.4	33104	24632.2	24835.9	55629.9	94995.9	44295.3	23339.5	38200.1	57266.8	30883.7	52287.9	0.590647	0.0744917	0.871784
M217T248	217.00316	247.8910	nodiff									493794	483783	515633	486439	630336	509688	483098	442805	535104	491946	475509	712850	519945	523552	0.993111	0.938747	1.28557
M143T69	143.10744	68.8820	nodiff									980197	930492	932860	971822	993027	834811	952948	1.19588e+06	867126	869076	945301	980403	940535	968455	0.97117	0.620188	1.89125
M99T366	98.95123	365.8500	nodiff									468092	10357.2	8824.5	6595.69	10613	7554.39	9664.92	9449.56	6470.05	4255.26	5467.98	14237.7	85339.4	8257.58	10.3347	0.337809	0.813469
M853T157	852.54112	157.0510	diff									314868	426059	263927	403355	398613	201466	247042	221239	89525.7	128894	216913	195078	334715	183115	1.82789	0.00650786	2.14692
M495T161	495.11671	161.4010	nodiff									71297.4	82633.7	256590	44601.8	66485.8	55335.6	81511.6	110366	39706.2	16299.5	100400	74361.7	96157.4	70440.9	1.36508	0.487889	0.259453
M155T57	155.10722	56.6140	diff									5953.14	6324.52	6980.22	5152.97	5162.36	6960.02	54492.2	66804.9	45972.8	55381.2	248818	55563.4	6088.87	87838.7	0.0693187	0.0298661	1.64576
M768T108	767.54354	107.5000	nodiff									382430	404327	458395	375433	369477	671875	542519	488834	7043.67	5840.45	562879	9491.33	443656	269435	1.64662	0.199512	2.35612
M714T175	713.56057	174.5185	nodiff									124598	102912	141256	155945	115968	137994	163021	221135	113626	48909.9	156334	164625	129779	144609	0.897449	0.565462	0.706282
M821T138	820.58201	138.0975	nodiff									186633	239426	275124	195383	171397	455267	151772	309230	105832	92619.1	390427	132362	253872	197040	1.28843	0.410613	0.841196
M572T36	572.48000	35.9900	diff									30948.6	69194.5	46602.3	37107.7	22019.8	84523.5	6497.26	6340.78	3487.87	1697.28	19541.1	1896.41	48399.4	6576.78	7.35913	0.00207834	1.20894
M150T36	150.00887	36.3230	nodiff									92621.1	56029.8	57744.9	72875.8	50936.4	50369.8	74333.5	95366.3	94249.9	80809.7	62707.4	59523.1	63429.6	77831.7	0.814959	0.146961	0.881274
M237T416	236.88324	415.8185	nodiff									64580.7	89297.9	47615.2	69568.1	109397	51027.3	66808.2	52517.8	27434	21910.7	53695.1	43606.8	71914.4	44328.8	1.6223	0.0427801	0.960618
M615T354	614.98516	354.0340	diff									349949	320315	309451	364095	352649	349168	310438	340424	45961.5	16627.5	313204	154795	340938	196908	1.73145	0.0360923	2.29095
M221T221	221.01172	221.4535	nodiff									175094	90597.8	181410	127763	104511	181387	171656	187666	45094.2	16612.5	179790	103840	143460	117443	1.22153	0.468603	0.726055
M412T288	411.98279	287.5560	nodiff									191311	187015	175558	131833	287387	161579	179579	221157	178630	77146	242447	178116	189114	179512	1.05349	0.767886	0.838377
M311T360	310.93406	360.1530	nodiff									639104	448545	400562	635370	647545	658118	644937	655757	662864	141829	625366	679033	571541	568298	1.00571	0.974165	0.851763
M311T366	310.87679	365.7100	nodiff									7352.23	8716.58	8874.44	7399.72	8421.41	8378.04	8540.19	11196.2	437068	221080	9997.5	8519.83	8190.4	116067	0.0705661	0.16975	2.11874
M129T40	129.05505	40.0970	diff									101423	67883.5	42190.4	140442	74730.9	118772	37951.5	53823	28192.4	32977.9	53283.4	75384.8	90906.9	46935.5	1.93685	0.0227897	1.07332
M476T171	476.27766	170.7860	nodiff									53876.1	54425.5	46666.2	32567	49838.9	30032.4	36845.9	32030.7	68394.9	56893.5	29615.8	15252.4	44567.7	39838.9	1.1187	0.612649	0.484407
M236T174	236.09197	174.3630	nodiff									80993.6	57960.8	60230.5	94107.3	115190	76986.8	69338	89553.1	51799.1	32478.1	89763.6	62596.1	80911.5	65921.3	1.22739	0.262756	0.670299
M300T199	300.03864	199.0960	nodiff									64828	71484.1	57153.2	41225.1	180962	66451.6	60130.1	62895.9	20530.8	10650.2	60219.7	22317.2	80350.7	39457.3	2.03639	0.103115	1.22811
M123T25	123.04439	25.2970	nodiff									6903.39	10033.3	5936.1	5636.37	12738.7	4595.23	3936.77	7592.17	8843.7	3853.2	4396.61	3711.68	7640.51	5389.02	1.41779	0.180894	0.135244
M575T107	575.46685	107.3315	diff									109148	5046.68	154083	84922.9	33351.5	35786.3	293964	524188	636295	162594	544560	513704	70389.8	445884	0.157866	0.000615951	4.02568
M337T590	336.89795	589.6115	nodiff									526906	553142	578194	645947	495005	579315	585796	615572	625478	538937	657897	656133	563085	613302	0.91812	0.104064	2.03793
M167T370	167.04349	370.0405	nodiff									571553	412284	592025	532841	328232	518244	551473	589728	317974	206515	501760	399035	492530	427748	1.15145	0.396875	0.540993
M586T32	586.45036	31.9420	nodiff									11761.1	16594.9	45916.8	72352.9	11020.8	44975.4	17830.4	19136.9	8532.55	3928.06	12720.1	15790.8	33770.3	12989.8	2.59976	0.0730496	0.710565
M220T118	220.14631	118.0150	nodiff									523516	464924	474489	275889	525361	233514	514615	548302	516362	511669	466203	509528	416282	511113	0.814462	0.106427	2.14731
M739T108	738.50877	107.5000	nodiff									110772	201335	189504	134390	276230	81352.8	213707	97439.7	3083.46	2717.98	79979.5	3652.25	165597	66763.3	2.48037	0.0515822	1.84131
M254T49_2	254.43600	49.2400	diff									131173	55987.3	64660.7	97325.3	30899.3	58304.3	78128	179865	177211	138719	102633	166453	73058.4	140502	0.519982	0.0134781	1.78356
M666T23	666.05917	23.2180	nodiff									2749.28	13097.4	2001.75	1033.9	6680.12	4281.77	25733.3	4490.23	2215.3	1731.6	2482.38	7900.99	4974.03	7425.62	0.669846	0.571449	0.180362
M233T25	232.99326	24.6235	nodiff									2500.98	30410.9	1805.87	6552.94	5102.96	1492.48	1780.17	3329.88	26315.2	2310.46	4046.92	2590.54	7977.7	6728.86	1.18559	0.839822	0.143314
M279T144	279.23204	143.9770	nodiff									410855	193064	315384	250329	195373	147137	191540	172807	140588	127986	327544	150488	252024	185159	1.36112	0.207518	0.630025
M517T354	516.95047	354.0895	nodiff									419650	415892	408288	430729	434879	411031	411667	421216	125012	55938.7	396645	278136	420078	281436	1.49262	0.057831	2.15652
M794T153	793.53426	152.7265	nodiff									58388.3	220300	53541.1	55954.1	49999.7	22051.6	57678.9	53357.4	102728	29925.1	51467.7	40409.3	76705.7	55927.7	1.37152	0.517365	0.337385
M557T176	557.26105	176.1650	nodiff									77743.7	5061.07	77117.9	80447.7	46166.3	6729.09	89432.6	8798.47	8488.06	9854.51	113839	73398.1	48877.6	50635.2	0.96529	0.943487	0.357257
M741T40	740.52151	39.9930	nodiff									27659.1	20853	35584.8	29164	15224.1	13064.4	43148.2	40399	17705.5	14291.4	22969.4	48435.8	23591.6	31158.2	0.757154	0.300372	0.434895
M233T580	232.92444	579.8870	nodiff									811045	461838	771378	797212	736726	1.37844e+06	1.45699e+06	1.49532e+06	734159	1.43252e+06	643969	547029	826107	1.05167e+06	0.785523	0.333434	2.21419
M599T354_1	598.95438	354.0895	diff									346282	335473	314951	353364	351756	346892	319916	341870	60192.8	25133.3	313030	171113	341453	205209	1.66392	0.0392582	2.21458
M701T144	700.52446	144.2050	diff									114665	129908	100696	115825	90550.7	76026.6	205079	162042	106580	113931	221541	142132	104612	158551	0.6598	0.0269119	1.45851
M196T93	196.01051	93.4300	nodiff									138348	97106	370219	6427.87	113236	8303.24	31283.3	14363.5	18812.7	32646.1	4199.53	87537.9	122273	31473.8	3.88492	0.13436	1.07701
M671T127	671.46588	127.3540	nodiff									570210	197600	434526	583316	189024	77537	415339	466552	161519	152520	196524	41621.6	342036	239013	1.43103	0.375543	0.860393
M723T107_2	723.49824	107.4650	diff									581864	453100	605578	662472	468307	479512	220607	247907	13282.8	56086.3	200907	108671	541806	141244	3.83597	1.83707e-05	3.88882
M187T299	187.04189	298.8555	nodiff									9913.08	10987.6	15070.1	10392.2	6057.44	11772.1	13650.7	8442.35	13455.3	42426.8	114454	12194.6	10698.8	34104	0.31371	0.195784	0.727958
M303T171_2	303.08829	171.1960	nodiff									121891	5540.16	289451	136786	66939.2	125011	96352	130978	31377.8	17212.5	66403.3	59494	124270	66969.7	1.85561	0.205011	0.835822
M818T124	817.58028	123.6660	nodiff									182317	323534	245964	273195	224251	317574	394691	300663	14501.9	6074.1	338127	78138.6	261139	188699	1.38389	0.356199	1.65381
M363T44	363.24909	44.0160	nodiff									29392.2	34118	32390.4	57777.2	43511.1	214532	42161.6	52821.3	24439.5	29586.6	32314	35049.8	68620.1	36062.1	1.90283	0.299775	0.783923
M303T171_3	303.13751	171.2280	nodiff									7627.5	6860.16	3738.74	205632	13695.9	3400.97	6385.78	9007.62	2934.4	3975.82	6309.73	3469.02	40159.3	5347.06	7.51053	0.318267	0.735794
M255T84	255.19660	83.8930	nodiff									20552.7	20300.9	352962	13540.4	228234	6036.77	11146.8	13375.5	11639.8	5747.57	9097.1	8458	106938	9910.79	10.79	0.138788	1.13637
M681T354_1	680.95799	354.0395	diff									273481	262415	245507	283536	292042	269515	254381	273246	30398.1	10941.7	244310	106123	271083	153233	1.76909	0.036766	2.10269
M255T108	255.15922	108.2230	nodiff									21206.8	12099.1	353997	16981.2	13555.1	341027	9368.48	13184.7	7301.62	7807.87	363277	253936	126478	109146	1.15879	0.859218	0.104498
M308T46	308.31342	46.1640	nodiff									4536.74	92677.9	86924.8	91115.9	895.308	79118.2	85530.6	94224.2	64936.2	68278.6	79654.5	76476.3	59211.5	78183.4	0.757341	0.32962	0.739466
M237T34_2	237.03547	33.9660	nodiff									11001.1	7812.78	4838.96	4148.68	12573.3	16905.5	8850.37	5641.18	8280.36	8314.68	5357.16	8097.66	9546.7	7423.57	1.286	0.333922	0.139418
M166T346	166.01744	345.5755	nodiff									27148.2	27692.1	70931.2	18339.8	25484.1	27165.7	42084.8	51269.1	90963.8	20963.5	51709.6	52755.3	32793.5	51624.3	0.635234	0.150456	0.855373
M640T25	640.36754	25.1820	nodiff									15955.4	22273.7	6089.81	18042.3	101163	13250.6	3005.74	4244.8	1630.87	517.261	3413.79	1632.75	29462.5	2407.54	12.2376	0.0920002	0.917974
M726T142	725.51876	141.6910	diff									237544	247104	296493	282296	317607	251933	219568	200029	159537	129472	163534	157094	272163	171539	1.58659	0.000288711	1.80205
M512T158	512.30518	157.7350	nodiff									2752.3	2560.79	55941	148973	38366.7	74181.7	2862.35	14308	2852.78	1123.32	2712.34	4993.83	53795.9	4808.76	11.1871	0.0536828	1.13921
M593T109	593.47741	109.2360	diff									60585.6	15997.8	42899	41064.6	19873.5	19204.8	287281	376090	214713	114750	259748	251854	33270.9	250739	0.132691	0.00012025	3.07223
M259T168	258.92054	168.0055	nodiff									581297	520533	337892	522575	539254	440125	459587	439743	596784	699875	317616	395745	490279	484892	1.01111	0.937738	1.66792
M536T183	536.37112	183.2750	diff									26095.2	18294.3	21337.9	23140.2	15975	17229.1	74388.2	63679.1	36702.1	34640.1	131905	49565	20345.3	65146.6	0.3123	0.0128928	1.30011
M469T354	469.02802	353.9670	diff									235582	207366	203775	249896	245016	238580	207065	226634	23557.3	9688.19	197966	83322.5	230036	124706	1.84463	0.0269759	1.98532
M463T29	462.96701	29.1390	diff									44911.4	67459.2	27526.3	49040.8	83229.1	96752.5	28640	29865.8	30902.2	22075.5	24909.9	18408.4	61486.5	25800.3	2.38317	0.00767755	1.06354
M154T139	154.02509	139.3455	nodiff									213160	196057	232336	190163	251000	116199	321087	504431	31337.4	7437.96	405282	156421	199819	237666	0.840755	0.667466	1.70609
M769T109	768.55282	109.2450	diff									540802	486960	503805	553071	494962	704854	424566	225182	11790.2	7979.47	156389	75611	547409	150253	3.64325	0.000279117	3.94782
M199T39	199.16965	38.7800	nodiff									85314.4	57511.6	56858.1	76444.5	54758.7	87253.7	67128.1	71402.3	71474.7	14760.9	60946.3	63879.8	69690.2	58265.3	1.19608	0.314474	0.251083
M393T357	392.93697	356.7300	nodiff									344032	523034	481100	328023	333695	493191	426225	390892	304512	185550	546299	471087	417179	387428	1.07679	0.651778	0.160792
M377T360	376.90531	360.1910	nodiff									300628	327119	471194	444431	311280	455090	475959	467253	516558	96058.7	291050	503693	384957	391762	0.98263	0.929809	0.535291
M531T39	531.44018	39.4435	nodiff									23965.7	15262	24920	18247.8	10123	12522.3	52905.1	73698.3	44939.2	8631.51	36407.2	40327.3	17506.8	42818.1	0.408864	0.0189046	0.961683
M736T176_1	735.52215	176.1885	nodiff									71619.8	60242.1	72534.8	81586.2	67095.8	73606.7	121508	142348	76917.6	43726.8	125847	104013	71114.2	102394	0.694519	0.0654106	1.14508
M137T578	136.93637	577.6820	nodiff									1.41042e+06	1.07531e+06	726623	1.38528e+06	981565	1.40873e+06	702967	1.43375e+06	1.30119e+06	1.434e+06	955585	1.12845e+06	1.16466e+06	1.15932e+06	1.0046	0.974955	2.49129
M363T155	363.21688	155.2025	nodiff									21199.3	38386.4	4237.15	46398.5	241528	24286.5	1248.37	1797.49	2140.42	629.404	993.878	722.262	62672.6	1255.3	49.9262	0.121211	1.3636
M204T31	203.99812	30.5115	nodiff									22597.8	3106.42	4055.23	16624.2	31880.4	1843.66	6807.05	16074.8	21107.8	12106.8	6524.47	4798.24	13351.3	11236.5	1.1882	0.717478	0.0392253
M597T36	596.52648	35.6990	nodiff									5951.3	14780.4	8490.39	7221.49	4755.53	55383.8	3777.68	5405.96	841.425	68.3042	3301.43	699.484	16097.1	2349.05	6.85262	0.117781	0.594668
M572T179	572.24202	179.4170	nodiff									10942.4	3401.66	14096.1	32372.2	5207.69	48858.2	127.793	1828.48	1095.12	2097.33	1042.55	1774.06	19146.4	1327.56	14.4223	0.0346401	0.733923
M452T171	452.12179	170.8275	nodiff									2436.63	59366	266004	1804.38	1303.99	30644.2	6406.58	5253.68	6254.07	1856.52	2775.75	2814.75	60259.8	4226.89	14.2563	0.213912	0.909119
M556T176	556.26753	175.5790	nodiff									11442.4	11442.7	9562.24	13882.6	10750.9	67528.3	14315	16370.3	14216.8	10324.9	12258.1	12989.6	20768.2	13412.4	1.54843	0.452387	0.333315
M280T48	280.36942	47.6590	diff									59003.7	48717.9	58175.8	6341.23	28698.4	100426	83863.5	173097	99505.6	88549	122258	126041	50227.1	115552	0.43467	0.0058204	1.60169
M221T247	221.01139	246.5430	nodiff									47811.3	37666	49871.7	41346.7	29898.6	42603.4	76786.4	62499.8	22835.3	54319.3	63151.9	56107.1	41533	55950	0.742323	0.0992571	0.645121
M228T155	228.02717	154.5775	nodiff									234391	271132	276734	291040	146778	206823	297081	239451	368910	477806	243947	324430	237816	325271	0.731133	0.0676451	2.27727
M281T168	281.24788	168.1210	nodiff									62586.2	51623.9	48810.2	86237.3	49460.5	117446	36974.9	51380.2	23369.3	26289	43075.5	30405.5	69360.6	35249.1	1.96773	0.0177177	0.998881
M404T289	404.19143	288.6685	diff									3133.36	3490.74	3492.9	4930.64	2389.9	2389.19	43416.9	56570.1	18879.4	15222.7	110443	23290.7	3304.45	44637.2	0.0740292	0.0182854	1.21758
M841T108	840.57604	108.4675	diff									214012	389203	226445	192811	387853	775188	196577	181465	1247.23	425.897	127332	144337	364252	108564	3.35518	0.0242377	2.88511
M230T380	230.03889	379.7570	nodiff									590825	397072	648737	506604	282514	466517	700640	720597	510463	198069	671008	508699	482045	551579	0.873936	0.48895	1.45635
M333T41	333.27782	40.6225	nodiff									40841.5	50498.7	46819.4	28703	17139.2	29983.2	25225.8	32108.1	24378.6	24766.4	27593	25080.7	35664.2	26525.4	1.34453	0.114668	0.430893
M756T140	756.49401	140.4140	nodiff									54120.3	7618.37	21316.7	8502.75	7386.43	7113.39	6730.85	5923.82	4246.67	8657.02	7935.76	11190.3	17676.3	7447.4	2.37349	0.212873	0.335095
M173T502	172.95780	501.6465	nodiff									141641	145372	209058	144143	144352	144766	166540	72785.2	131040	284236	148796	121860	154889	154210	1.0044	0.982959	1.12527
M299T418	298.85776	418.2310	nodiff									33787.9	35544.7	38245.8	34456.5	38425.1	64451.1	35496.9	37053.4	44514.8	45906.2	38586.7	42657.6	40818.5	40702.6	1.00285	0.982296	0.421172
M217T208	217.00266	207.6160	nodiff									1.01079e+06	651981	1.00356e+06	1.06461e+06	1.05368e+06	1.12374e+06	365150	1.12233e+06	536477	1.86371e+06	1.12187e+06	1.38972e+06	984728	1.06654e+06	0.923289	0.735286	2.53281
M217T223	217.05214	223.2350	nodiff									551810	4744.49	8383.36	4017.8	5508.33	4910.22	11411.4	15354.8	3344.21	716701	567368	5632.17	96562.3	219969	0.438982	0.465722	1.82727
M793T107	792.55176	106.8800	diff									154706	235373	229791	149182	169048	476640	162314	147366	5910.26	6651.88	202602	7474.33	235790	88719.6	2.6577	0.0414004	2.0996
M241T107_2	241.18055	107.0585	nodiff									286452	147921	69728.7	226455	61726.8	230244	34285.8	213435	115065	58613.3	171277	99077	170421	115292	1.47817	0.265184	0.810542
M375T35	375.18297	35.0750	nodiff									9917.5	6011.24	4956.9	7224.48	8288.53	47279.5	4739.2	20950.1	8889.09	7554.54	5146.48	4834.55	13946.4	8685.66	1.60568	0.480071	0.270767
M742T39	742.48117	38.7360	nodiff									24783.4	21458.1	5602.67	4364.17	14501.3	3552.04	18488.7	18560.7	11273	9298.65	12666.9	13812.2	12377	14016.7	0.883015	0.696723	0.189871
M577T180_1	577.30013	180.3920	nodiff									83122.6	42507.7	9466.23	54564.5	9484.09	42164.6	13185.7	16108.3	9952.48	2744.08	10309.1	10218.4	40218.3	10419.7	3.85983	0.0280727	0.882854
M289T191	289.07344	190.5625	diff									42747.4	42892.1	31391.4	53065.5	21349.3	76394.1	15453.3	24442.6	5906.79	970.875	20827.3	12485.4	44640	13347.7	3.34439	0.0044117	1.03138
M157T106	157.12269	106.1270	diff									304677	222587	330962	318194	428180	502665	206040	210962	197909	202665	169225	177619	351211	194070	1.80972	0.00331389	2.06733
M697T127	697.48158	127.4175	nodiff									254329	217187	225814	226206	205303	130695	202234	523048	9788.27	7436.58	235052	63275	209922	173472	1.21012	0.666482	1.28636
M183T56	182.82412	56.2650	nodiff									172564	200887	94142.1	167644	163962	201302	118509	103849	145053	123552	164102	143857	166750	133154	1.25231	0.0963347	0.641591
M171T56_2	171.13837	56.0420	nodiff									74756.4	89192.2	54383.4	111970	25624.3	83450.3	52561.9	67182.3	71039.8	52572.4	60467.8	61737.2	73229.5	60926.9	1.20192	0.352048	0.580788
M494T189	494.32381	189.3425	diff									89441.5	93225.4	133991	88870.1	86552.9	93813.5	144453	150624	153704	105669	155194	130820	97649	140078	0.697107	0.00266865	1.50713
M221T32	221.03000	31.9540	nodiff									18728.7	27453.7	15958.8	20944.2	83808.1	16066.6	12824.8	18619.9	8701.31	20516.7	17006.7	10119.3	30493.4	14631.5	2.08409	0.179096	0.591864
M393T347	392.87994	346.8720	nodiff									3348.18	164983	3951.54	3140.57	3743.85	3147	4260.05	4275.55	29828.4	4775	2672.13	5166.72	30385.6	8496.31	3.57633	0.440618	0.486465
M433T190	433.23502	190.1545	diff									39902.7	18765.3	35473.2	29764.9	15140.9	16791.8	48481.9	34817.1	98282	95355.7	51440.3	72248.3	25973.1	66770.9	0.388989	0.00534972	1.40726
M140T182	140.00958	182.0130	diff									95248	127848	88758.3	96776.3	192983	77631.9	52464.9	59956.8	17462.9	7225.27	64890.2	35937.3	113208	39656.2	2.85472	0.00405637	1.6616
M447T107	447.34610	107.3660	diff									46278.3	34666.4	64128.1	33668.9	14292.7	21765.2	153024	264292	354898	77031.5	141210	156217	35799.9	191112	0.187324	0.00389153	2.45461
M335T63	335.22165	63.4315	nodiff									105104	53048.2	18169.3	56901.4	167871	55439.3	140065	90271.5	58146.3	57219.5	73968.5	72103.7	76088.9	81962.3	0.92834	0.81891	0.670896
M127T29	126.90414	28.5580	nodiff									28777.1	26523.6	15743.2	19759.7	12046.3	37890.3	33348	23419.1	28792.1	10838.2	20023.3	18229.1	23456.7	22441.6	1.04523	0.845005	0.106319
M186T26	186.42573	26.3415	diff									51325.2	66513.6	21360.7	24151.2	124187	22366.2	9209.26	10324.8	12200.5	8583.73	8262.45	8171.13	51650.6	9458.64	5.46068	0.0274381	1.10715
M464T27_1	463.84217	26.9250	nodiff									45132.3	33923	38002.9	60614.1	25222.5	85660.3	18449.9	27196.3	18545	8394.8	20541.8	22163.1	48092.5	19215.2	2.50284	0.0111544	0.935943
M145T409	145.06115	408.5020	nodiff									77336.3	51112.6	289995	319551	147412	270118	327013	325198	290706	208465	341341	294886	192588	297935	0.646409	0.0664456	1.8759
M865T84	864.57781	84.3435	nodiff									74321.6	75256.7	109139	70818.3	96989.2	394139	91799.4	125883	82498.2	79715.2	85994.5	72.3233	136777	77660.4	1.76122	0.303899	0.992875
M257T121	257.17514	121.2360	nodiff									58311.2	30375	18625.4	52062.6	2295.28	36468.1	51102.4	77514.8	26545.1	32987.3	169840	45507.7	33022.9	67249.6	0.49105	0.173545	0.934979
M327T139	327.23192	138.6990	diff									112406	122171	217430	151420	120908	105950	235239	221497	155379	120202	213097	280748	138381	204360	0.677142	0.046603	1.63078
M682T29	681.98684	28.9475	nodiff									28698.8	31242.1	13756.8	22915.4	23425.3	71179.3	14290	15276.4	17200.1	13604.5	12119.1	10478.5	31869.6	13828.1	2.3047	0.0546549	0.682171
M360T37	360.22183	36.9100	nodiff									42618.5	23958.8	26051.3	43794.8	15516.1	28102.3	18624.5	31188.7	14103	7261.64	13320.9	13870.6	30007	16394.9	1.83026	0.0356028	0.563073
M422T29	421.99727	28.7080	nodiff									21420.5	19390.5	15100.3	6317.74	22942.9	16078.5	10737	13051.8	8372.1	7089.72	10120.3	8059.37	16875.1	9571.73	1.76301	0.0184864	0.411924
M463T107	463.34135	106.8420	diff									53917.6	34076	83941.6	40388.8	23426.6	46868.7	120254	219938	120817	52726.9	110017	126132	47103.2	124981	0.376884	0.00797823	1.78049
M273T197	273.00661	197.3800	nodiff									14654.6	8789.49	11173.9	8436.67	15841.7	8129.17	2047.61	2465.72	933.581	977.489	2935.3	919.539	11170.9	1713.21	6.52047	5.5631e-05	0.579575
M127T380	127.05055	379.5610	diff									575999	417187	601867	522987	338774	506524	344883	539200	242232	144253	301826	377338	493890	324955	1.51987	0.0321562	1.89244
M475T355	474.93968	355.2260	nodiff									340915	345676	345532	365278	354157	346822	343338	347077	140369	72164.2	330852	276858	349730	251776	1.38905	0.069043	1.71294
M465T108_2	465.35676	108.2125	diff									55194.4	30377.9	74989	47167.3	26707.7	20325.6	161497	288840	145567	48824.7	156491	229254	42460.3	171746	0.247228	0.00366052	2.27457
M490T37	490.35639	36.9125	diff									56408.1	27131.6	46175.2	73510.8	46309.3	20697.8	11859.1	18869.1	2172.14	9817.82	15264.4	5979.41	45038.8	10660.3	4.22489	0.0019231	1.02233
M308T292	308.09751	291.6655	nodiff									39363.8	29629.7	76833.5	41269.2	17800.2	41837.8	49625.6	56720.8	38301.9	28352.7	47986.2	50830.1	41122.4	45302.9	0.907721	0.655371	0.464858
M841T84	840.57522	83.6540	diff									81771.3	88161.4	122916	88312.2	105424	335828	72467	107172	426.589	126.838	33179.5	529.338	137069	35650.3	3.84482	0.0448727	1.73293
M278T46	278.36003	45.5590	nodiff									86097.2	36494.4	45438	72796.1	13620.2	34591	50912.2	126452	54866	86696.1	64194.6	64131.2	48172.8	74541.9	0.646251	0.127902	0.981759
M279T107	279.23214	106.9620	diff									242133	152933	163654	228120	172736	173063	158852	201375	68061.2	51147.8	144833	75003.9	188773	116546	1.61974	0.0312148	1.42584
M279T106_3	279.16007	106.3550	nodiff									9691.81	7604.55	4768.25	9341.05	15736.5	6345.66	163974	220998	81050.5	58594.1	2600.24	3995.56	8914.64	88535.3	0.10069	0.0512018	1.41551
M509T354	509.02036	354.0395	diff									210571	189750	179664	207247	205735	205492	183324	198815	30854.7	12445.1	179824	90208	199743	115912	1.72323	0.0336957	1.74278
M292T29	291.95900	29.0250	nodiff									7076.29	10737.7	3264.82	7224.28	75128.4	5935.14	3595.66	6521.78	5511.46	3793.07	3861.77	2762.4	18227.8	4341.02	4.19896	0.252555	0.616025
M292T26	292.03815	25.7530	nodiff									9351.69	14375.8	3810.36	7520.88	51769.3	3411.43	3156.17	5130.52	2922.25	3491.9	4560.85	2812.12	15039.9	3678.97	4.08808	0.162645	0.560609
M747T107	746.51239	107.1810	nodiff									138227	127817	162092	165600	178742	142760	565085	340794	1667.76	1110.5	583568	14557.3	152540	251131	0.607412	0.413014	1.91686
M343T418	342.86430	418.2310	nodiff									41446.1	41638.1	39762.9	43155.5	38994.6	55330.1	44967.2	39790.8	48517.6	44711.2	45107.6	44309.8	43387.9	44567.4	0.973535	0.673036	0.463426
M155T444	154.94692	444.1980	nodiff									1.71593e+06	1.24815e+06	1.60123e+06	856148	1.37913e+06	1.5988e+06	1.70951e+06	1.79531e+06	1.81732e+06	581424	1.7229e+06	652525	1.3999e+06	1.37983e+06	1.01454	0.943114	0.925909
M255T171	255.23209	170.6065	nodiff									82180	79523.1	52993.7	71517.5	59396.1	92869.7	48576.8	55093.3	36891	35776.6	52823.1	44499.1	73080	45610	1.60228	0.00262848	0.896015
M277T105	277.05901	105.0105	nodiff									22886.9	32076.7	210552	32471.2	23870.2	20658.6	64661.5	47634.5	49193.7	72055.6	88165.8	96076	57085.9	69631.2	0.819832	0.701586	0.78665
M183T155	183.00591	154.5640	diff									176705	217960	212441	200273	210143	158183	259068	199770	293921	330977	203765	214522	195951	250337	0.782747	0.0467781	1.67688
M639T354	638.94739	354.0545	diff									227550	220595	203347	226919	229580	225834	210265	225135	37320.9	15454.3	210694	109952	222304	134804	1.6491	0.0463284	1.77694
M466T194	466.32845	194.3895	nodiff									49845.3	45483.1	64753.4	54719.9	66979.6	50366.1	92955.8	102564	58651.7	35003.8	86606.1	68568.8	55357.9	74058.4	0.74749	0.113909	0.939314
M555T40	555.44079	39.9540	nodiff									20781.5	10240.5	18349.4	23909.8	9803.13	21517	30044.8	62966.8	22592.6	9818.48	23988	30065	17433.5	29912.6	0.582816	0.134879	0.587022
M908T185	907.53450	185.0020	nodiff									50289.1	26835.9	28887.7	52160.8	33799	38557.7	27060.9	29719.8	5562.45	5248.88	28032.1	16253.3	38421.7	18646.2	2.06056	0.0110862	0.790055
M557T354	556.94352	354.1845	nodiff									277770	267330	265372	283148	280877	270383	262047	276041	73420.5	33191.5	266126	175245	274147	181012	1.51452	0.0575872	1.77187
M654T63	653.51495	63.0580	diff									3032.51	406.927	6228.22	2689.79	1275.15	1341.16	52171.6	15453	16827.7	25665.5	47904.4	42634.8	2495.63	33442.8	0.0746237	0.00090134	1.07109
M436T186	436.28211	186.2025	nodiff									112816	82083.9	79205.8	53921.2	92023.3	61665.8	73817	79318.6	72616	67979.5	59486.8	36520.3	80286	64956.4	1.236	0.18238	0.30536
M513T109	513.35536	108.8090	nodiff									2725.02	5384.77	3646.36	20726.1	15077.3	13380.9	10498.9	8311.06	8982.71	5064.15	12882.6	11074	10156.7	9468.89	1.07264	0.83299	0.112965
M900T188	899.53015	188.3170	diff									80919.5	103647	81443.5	86235.3	92340.6	94060.2	71568.9	98929.3	27020.3	11238.8	59757.9	34211.7	89774.3	50454.5	1.77931	0.0165222	1.18191
M697T354_2	696.98915	353.9960	diff									190190	171096	156840	193964	191497	182377	154573	182512	17528.3	5796.19	158702	67046.3	180994	97692.9	1.85268	0.026903	1.76336
M297T31	296.97914	31.0405	nodiff									33253.3	29461.6	14136.5	20649.9	52504	76690.3	23838.2	21938.6	38955.8	44493.2	13479.8	25196.2	37782.6	27983.6	1.35017	0.374771	0.376136
M165T140	165.00456	139.5780	nodiff									169438	150186	194637	156793	206174	104571	260242	408991	25781.5	6106.49	339220	127149	163633	194582	0.840948	0.667057	1.5444
M201T46_1	200.98558	46.1810	nodiff									20680.2	28631.8	4702.95	38922.8	201041	13125	2618.92	14513.5	5236.05	4781.31	5847.85	3644.59	51184	6107.03	8.38116	0.169099	1.14882
M373T167	373.31060	166.9060	diff									7553.01	3662.54	18545.6	6574.74	2600.79	3805.49	84008.2	165354	55164.8	23103.1	63102.4	75493.9	7123.69	77704.4	0.0916767	0.00493942	1.63292
M219T32	218.99633	31.8460	nodiff									16163.1	10169.5	16925.3	12788	70729.9	11370.2	13025.1	18221.1	14536.2	5516.77	8638.35	5823.7	23024.3	10960.2	2.10072	0.247693	0.546969
M259T605	258.92044	605.2320	nodiff									1.50136e+06	1.50495e+06	1.54562e+06	1.43679e+06	1.51219e+06	1.52164e+06	1.55181e+06	1.16456e+06	512181	648651	1.27641e+06	1.52103e+06	1.50376e+06	1.11244e+06	1.35176	0.0547624	2.83553
M629T48	629.45432	48.2940	nodiff									7504.7	1680.47	19998.5	4118.31	4475.27	7712.87	2462.63	4112.07	7147.39	5725.47	2368.91	4613.81	7581.68	4405.05	1.72114	0.275987	0.261917
M261T186	261.04237	185.7875	nodiff									66296.6	35285.7	22742.3	40860.9	39545.2	54105.2	34923.5	52158.8	34505.2	17778.2	36582.4	35100.5	43139.3	35174.8	1.22643	0.321057	0.250814
M157T9	157.12274	8.9570	nodiff									419713	492250	345784	359762	295204	485670	387051	323500	398499	329195	355760	498070	399730	382013	1.04638	0.680719	1.15951
M925T179	924.56207	179.0860	nodiff									7338.58	9024.27	71049	12567.7	3291.42	10224.7	44090.9	40651.4	14584.3	4707.39	52326.4	31119.5	18916	31246.6	0.605376	0.361545	0.52001
M217T301	217.05295	301.4180	nodiff									7751.88	280553	272414	6170.4	295123	8002.98	15260.6	255038	6730.51	11868.9	12957	274194	145003	96008	1.51032	0.561368	0.691408
M495T191	495.27163	190.7105	diff									52366.1	41701.7	54567	33483	23787.9	29673.8	74304.1	72504.8	70660.5	51339.3	89052.5	73924.9	39263.2	71964.3	0.545593	0.000955924	1.27749
M307T300	307.08334	299.7685	nodiff									234107	198647	321433	202409	137442	268662	302007	369064	296899	242608	246707	331422	227117	298118	0.761835	0.0548537	1.94636
M237T315	236.91751	315.0885	nodiff									4131.95	4047.67	5936.86	249460	4742.45	3116.85	6053.71	4374.74	4281.07	6489.44	6037.99	278555	45239.3	50965.2	0.88765	0.927257	0.263192
M293T290	293.04048	290.3825	nodiff									2477.16	2671.51	1526.33	2232.54	1080.69	1614.54	4105.77	1571.9	1182.68	1227.81	18842.3	1126.49	1933.79	4676.16	0.413543	0.363835	0.248643
M201T274	201.02503	274.0450	nodiff									694359	468097	399122	437135	460203	665816	312230	401543	394265	388987	488734	464549	520789	408385	1.27524	0.0787196	1.25387
M213T155	213.01649	155.1960	diff									194976	241875	246552	244320	115008	160647	337623	268579	256094	197647	278344	262313	200563	266767	0.75183	0.0438847	1.74276
M773T156	772.58547	155.8280	diff									235382	261645	210474	230057	201553	174610	168525	168119	117428	98818.3	176159	149475	218953	146421	1.49537	0.00224127	1.40139
M700T28	700.29633	28.3040	nodiff									12052.6	3994.65	13283.5	11481.5	1718.68	35449.9	10990.8	10238.3	7518.67	3209.03	10226.6	10320.2	12996.8	8750.61	1.48525	0.418522	0.244646
M295T44	295.26321	43.9225	nodiff									68299.7	25894	83224.2	48834.4	25561.6	47515.8	51705.2	98303.5	66833.2	55310.4	36401	64606.6	49888.3	62193.3	0.802148	0.35256	0.8237
M213T172	213.01649	171.7970	nodiff									184436	245779	778787	15970.9	128536	203916	288867	205556	298629	188183	353941	287326	259571	270417	0.959891	0.924575	1.13892
M639T351	638.88344	351.3920	nodiff									224112	2356.76	191844	123847	3136.07	223775	184726	144031	1369.05	14444.6	2475.92	111192	128178	76373.1	1.67832	0.356962	0.821481
M173T445	172.95736	444.8595	nodiff									747452	782910	731252	776028	679997	748361	507136	260383	829932	904524	787036	884907	744333	695653	1.06998	0.656148	2.25013
M173T426	173.00855	426.3690	diff									53185.1	59435.9	39586.3	55240.6	122718	43540.7	19750.3	21822	13467.8	10007	29617.3	16466.8	62284.4	18521.9	3.36275	0.00648961	1.23269
M277T107	277.14379	107.4620	diff									6167.34	6724.29	4380.77	4204.89	6540.88	20878.8	57825.4	3525.82	47386	68038.2	4665.1	91462.6	8149.5	45483.9	0.179173	0.0286186	1.14464
M769T139	769.47114	139.1630	nodiff									4057.36	47700.8	6745.51	4170.84	13852.4	8494.49	9340.28	10752.2	8525.83	7806.39	11317.9	23559.8	14170.2	11883.7	1.1924	0.75965	0.0712438
M97T31	96.95956	30.7400	diff									55913.7	100542	28009.6	64225.3	150865	29233.8	22990.8	26369.1	23740.2	19692.6	18864.4	27194.3	71464.9	23141.9	3.08811	0.0312355	1.16753
M341T33_1	341.17888	32.8765	nodiff									4897.4	5656.96	16723	5015.15	23048.6	5760.08	5493.8	52968.1	2214.17	1837.46	45235.2	25606.8	10183.5	22225.9	0.458183	0.247568	0.65925
M239T62	239.16445	62.2420	diff									88688	52610.6	48420.2	93691.7	23451.2	30648.1	66609.6	106107	91972.4	75716.2	115741	79990.8	56251.6	89356.2	0.629521	0.0417562	1.18937
M562T63	562.49114	62.7160	diff									28062.1	10343.2	29055.7	22257.3	10412.1	7720.79	59459.8	97776.7	114627	56285.9	69670.1	77608.7	17975.2	79238.1	0.226851	0.000122899	1.6746
M727T140	727.45560	140.2425	nodiff									4975.08	5874.56	94953.1	7753.88	9088.27	51819.7	67266.2	5646.73	6183.23	5027.73	122922	6203.94	29077.4	35541.7	0.818121	0.802591	0.305148
M359T26	359.11609	25.8920	nodiff									342.804	138.292	304.265	348.548	1498.37	527.999	401.682	1605.2	341.724	428.319	1186.3	846.875	526.712	801.683	0.657008	0.364807	0.105802
M190T26	190.00576	26.3680	nodiff									25042	43439	12613.1	14397.1	80972.9	13764.7	5059.22	17147	19275.4	12294.9	6314.78	5082.25	31704.8	10862.3	2.9188	0.0935799	0.675215
M685T144	685.48119	143.9825	nodiff									116390	84606.9	70340.9	147580	80155.7	44515.2	70931.9	59253.2	72116	61546.4	53032.1	59082.8	90598	62660.4	1.44586	0.0945795	0.635894
M301T62	301.17913	61.9210	nodiff									46486.3	1034.51	9999.67	2756.98	62980	62856.4	2019.02	4170.05	3028.92	17124.9	2232.08	1974.16	31019	5091.52	6.09229	0.0625137	0.765787
M139T375_2	139.00049	375.2950	nodiff									33708.8	41410.9	78259.7	30703.5	15195.9	35030.2	55914.6	69067.7	40552	16296.9	57122.4	39680.9	39051.5	46439.1	0.840919	0.533223	0.429106
M623T354_1	622.91527	354.2800	diff									216493	219650	199546	226569	221150	221831	211002	214427	48101.5	20384.2	201129	125383	217540	136738	1.59093	0.0457477	1.68703
M871T139	870.61499	139.3670	diff									68492.6	95044.3	122025	65018.2	80370.5	105001	51670.9	53158.3	47472.8	25477.9	66443.6	40685	89325.3	47484.7	1.88114	0.00279919	1.08398
M200T229_1	200.06062	229.1960	nodiff									69978.7	130991	72540.4	81943.9	46102.6	160317	101580	117480	60424.1	40635.6	76395.6	84123.9	93645.6	80106.6	1.16901	0.531265	0.360343
M369T26	368.97157	25.9670	nodiff									2565.62	36325.6	2084.64	45942.7	8420.62	42105.1	4562.83	5734.05	19309.1	32868.6	11788.6	5475.05	22907.4	13289.7	1.72369	0.339027	0.511454
M447T63	447.34642	62.7880	diff									12680.7	5322.92	21501.9	9703.08	4672.97	6169.26	78373.3	113577	105469	55648.2	79375.1	93423.3	10008.5	87644.3	0.114194	5.7898e-06	1.87836
M473T109	473.36168	108.6120	diff									26741.3	11361.8	44359.8	22741.8	8475.92	10224.1	85279.1	222169	109390	45316.4	64568.2	107506	20650.8	105705	0.195363	0.00841605	1.80099
M123T364	122.96701	364.3050	nodiff									345123	483320	352184	352811	366700	366092	466895	352678	626442	540303	329259	515815	377705	471899	0.800394	0.0959644	2.30759
M215T229_2	215.07234	228.9240	nodiff									16615	56870.6	13371.8	25082.4	9052.41	82261.1	25665.7	36246.2	12540.9	10061.9	14229.1	21614	33875.5	20059.7	1.68874	0.298818	0.524658
M565T181_1	565.30453	180.8195	diff									14203.2	9700.96	25226.8	22060.4	7800.5	13856.1	74897.4	93454	42594.2	15810.9	63781.6	45118.8	15474.6	55942.8	0.276616	0.00555276	1.2524
M441T361	440.85930	361.3290	diff									300217	216745	205592	313519	220059	310489	299421	301379	403471	323332	294996	334042	261104	326107	0.800669	0.0365879	1.86335
M701T142	700.50315	142.2850	nodiff									108575	130901	126180	147930	164185	68647.7	74107.1	194616	110501	127487	15279.4	171134	124403	115521	1.07689	0.772493	0.436492
M169T37	169.04991	36.6800	nodiff									11360.5	24555.9	7835.62	27395	82525.6	7257.1	16469.6	18841.5	1340.74	5936.45	41744.3	9887.45	26821.6	15703.3	1.70802	0.414416	0.714175
M222T179	222.02551	179.2510	nodiff									3596.89	5687.68	3468.91	5606.31	9066.58	5977.46	38580.4	15699.2	8504.79	25826.6	69713.7	18325.4	5567.3	29441.7	0.189096	0.0255714	0.857371
M222T178	222.05102	178.3570	nodiff									2833.95	8666.22	8837.56	9175.93	12407.6	8225.66	33615.7	4390.23	9467.77	23922.1	42872.8	1614.01	8357.82	19313.8	0.432739	0.147584	0.473792
M263T185	263.05918	184.8160	nodiff									52650.4	31828.1	16311	26027.6	36252.9	27203.4	9887.19	9488.2	980.216	4844.81	8018.84	4721.22	31712.2	6323.41	5.01505	0.000629828	0.932078
M237T55	237.14899	54.9660	nodiff									19771	13340.7	14038.5	20231	14301.8	39188.8	29991.4	28957.1	40595.7	48301.6	44219.2	31730.6	20145.3	37299.3	0.540099	0.00811642	0.809016
M257T29	256.98696	28.7740	nodiff									43142	53115.6	19008.4	35016	114131	34351.7	15541.3	18326.1	33652.6	37441	13279.8	14340.4	49794.1	22096.9	2.25345	0.0821096	0.695954
M498T135	498.28768	134.9890	nodiff									79002.5	44174	233639	257848	189017	128787	33117.5	155855	21688.7	207272	40740.7	70681.3	155411	88225.9	1.76152	0.180828	1.00453
M88T342_2	88.04008	342.0455	diff									123880	90948.6	125452	117487	143206	109375	77050.1	80447.4	50512.6	48129	98453	67859.3	118392	70408.6	1.68149	0.00108593	1.23038
M85T426	85.02912	426.4080	diff									43134.6	48244.4	34272.5	47276.7	104293	39648.3	15825.3	20033.6	11973.6	8671.57	27100.4	12980.8	52811.6	16097.6	3.28072	0.00695422	1.13164
M77T410	76.97000	409.5590	diff									292609	278869	254983	269199	238679	309073	298201	356641	314058	311478	293892	293395	273902	311277	0.879929	0.0254663	1.53499
M573T107	573.45112	107.0590	diff									46778	24910.2	63851.4	68257.4	25752.6	21632.8	207158	209204	132550	71879.3	133526	120550	41863.7	145811	0.287109	0.00123622	2.05711
M739T354_2	738.99987	353.9670	diff									148498	135851	124855	158362	148424	146052	128639	151540	8806.77	2923.12	124479	40851.2	143674	76206.4	1.88532	0.0337867	1.58576
M775T107	774.54267	107.3850	nodiff									109104	139421	152784	101174	103912	130568	264050	281959	3454.64	2339.94	109826	67900.6	122827	121588	1.01019	0.981269	0.920456
M630T33_2	630.47790	32.6070	nodiff									13177.2	20663.3	61980.6	62684.8	11725.1	56936.3	30353.4	22214.2	7778	3199.38	13424.3	21711.8	37861.2	16446.8	2.30203	0.0813941	0.712482
M723T177	723.49903	176.9570	nodiff									189617	241193	166475	228929	219937	198854	173277	176040	86122.5	63904.7	385338	402464	207501	214524	0.967261	0.910234	0.683751
M763T354_2	762.96177	354.0395	diff									162014	152444	135302	164733	163434	154600	145190	159393	12609.4	4366.84	141041	53780.2	155421	86063.4	1.80589	0.0390409	1.61084
M705T354_1	704.91920	354.0395	diff									182268	173014	164180	192931	179897	184236	164519	175710	23975.4	9186.13	166890	81228.6	179421	103585	1.73211	0.0352991	1.65268
M791T39	790.54351	39.0780	nodiff									35304.9	16926.5	74118.4	27898.5	26189.4	29209	45099.7	65797.3	9195.36	9542.09	19768.5	35703.8	34941.1	30851.1	1.13257	0.745647	0.114889
M496T50	496.24577	49.6540	nodiff									73099.8	54855.9	91772.6	64144.3	53212.9	36183.3	87304.9	100303	6635.5	2940.98	90500.8	9058.39	62211.5	49457.2	1.25788	0.555845	0.648
M477T36	477.32374	35.9920	diff									9065.08	6437.88	13359.6	14621.3	5077.21	4128.57	83148.1	113912	57669	29830.8	76094.6	65875.3	8781.61	71088.3	0.123531	0.000306029	1.6247
M247T31	247.02752	30.7055	nodiff									15407.8	9013.34	9424.88	11108.3	51678.1	14815.5	9525.67	15363.4	18094.1	8934.99	10447.1	7278.25	18574.7	11607.2	1.60027	0.338073	0.34822
M247T30	246.99073	30.2150	nodiff									7103.1	5279.76	1345.31	9530.69	5877.28	6328.47	6194.61	3174.97	2923.39	1533.87	7260.68	5147.74	5910.77	4372.54	1.35179	0.301478	0.172253
M225T409	225.04939	409.3680	nodiff									21136.1	11089.3	5100.94	19426.8	17213.5	13781.9	4583.64	2768.6	8954.44	9170.46	5305.88	5771.66	14624.7	6092.44	2.40047	0.00883832	0.462091
M865T107	864.57655	107.4580	nodiff									105140	199098	126380	111096	104896	291292	182136	122233	1246.99	369.16	151422	165386	156317	103799	1.50596	0.274865	1.10931
M123T347	122.96685	347.3275	nodiff									97706.9	100854	97023.5	103189	97343.5	104231	98415.5	97265	118584	169523	96668.4	120641	100058	116849	0.8563	0.175195	1.06704
M281T179	281.01356	179.2640	diff									108369	112116	84566	140618	61594	132862	174348	139565	215181	149859	157543	227581	106687	177346	0.601577	0.00409677	1.76813
M507T160	507.27143	159.5510	nodiff									47636.7	25055.6	35536.2	28446.3	23411.4	31703.3	34788.7	36941.4	45230.3	26380.9	48899.9	46133.8	31964.9	39729.2	0.804571	0.153333	0.633465
M509T39	509.45704	39.3930	nodiff									12526.1	10872.8	11894	13835	7299.93	7017.61	26113.4	36678	2152.26	4542.2	16316.9	18318.3	10574.2	17353.5	0.609343	0.240906	0.420884
M614T31	614.48085	30.8715	nodiff									5521.98	23912.7	35616.7	19339.8	10447.3	50651.1	5951.71	5431.56	3334.37	1111.76	5545.94	4380	24248.3	4292.56	5.64891	0.0154973	0.783361
M579T176	579.38893	175.7150	nodiff									50929.6	12039.4	11650.1	21350.3	24967.6	30063.8	16729.2	13015.3	7481.24	3224.62	10350.3	6191.78	25166.8	9498.75	2.64949	0.0313748	0.621575
M307T28	307.06365	28.1545	nodiff									54218.1	20987.1	18161.3	40284.2	18894.7	17917.1	56954.9	52442	44935	35739.5	75076.7	43875.2	28410.4	51503.9	0.551617	0.020213	0.954475
M283T301	283.02923	300.9995	nodiff									218387	192101	189081	237462	134193	198135	206070	203504	230502	283198	202606	251181	194893	229510	0.849169	0.106188	1.57463
M303T31	303.19928	30.8680	nodiff									20041.1	5664.94	3352.94	4262.37	5890.6	11184.1	4559.69	4044.42	1977.23	1127.2	22660.7	3132.4	8399.34	6250.28	1.34383	0.620533	0.165449
M283T182	283.26359	181.7155	nodiff									549257	74623.1	93983.8	135798	125939	127132	117788	99966.3	63694.2	61358	132891	161785	184456	106247	1.7361	0.32357	0.748271
M579T180	579.42259	180.4650	nodiff									51870.4	2296.23	2644.15	15654.5	30299.4	27724.5	16730.1	13945.6	9443.04	20804.3	20448	9177.27	21748.2	15091.4	1.4411	0.425809	0.196984
M598T191	598.37169	191.3560	nodiff									35822.1	26729.8	30399	34636.6	16853.1	46569.6	24022.9	22438.1	8666.31	2868.36	27783.9	17454.4	31835	17205.7	1.85026	0.0269876	0.626582
M235T42	235.16954	42.1505	diff									9358.02	7625.72	15773.9	14850.7	10411.4	4962.26	53742.7	65541.5	34743.9	41865.2	113463	42531.8	10497	58648	0.178983	0.00238737	1.38991
M199T172	198.95358	171.9700	nodiff									306003	449183	305472	453108	516142	454533	355235	201432	453242	494936	391697	430240	414074	387797	1.06776	0.644726	1.10873
M124T336	124.00664	335.7230	nodiff									41866.8	33578.8	28492.7	24670.2	52691.7	32523.7	22873.8	50568.1	234591	35055.2	39538.6	41984.1	35637.3	70768.4	0.503577	0.315334	1.02771
M301T35_2	301.16498	35.0810	nodiff									20445.7	34128.9	32038.4	23041.3	29729	48697.3	25145.5	29185	15761	14723.9	17776.4	19889.8	31346.8	20413.6	1.53558	0.0420152	0.510548
M165T357	164.97742	357.0140	nodiff									348786	376913	316704	340201	371127	321091	320519	356393	221257	185085	324342	341238	345804	291472	1.1864	0.105541	0.866643
M537T176_2	537.41486	175.5445	diff									108457	32130	97807.3	50960.9	29441.5	36682.4	314622	406872	203169	119259	273377	244993	59246.6	260382	0.227537	0.000796712	2.93541
M459T357	458.90858	357.1855	nodiff									297498	289407	280305	174224	206487	272547	279326	168898	187073	110078	178711	282970	253411	201176	1.25965	0.160614	0.69643
M675T26	675.30119	25.8240	nodiff									13156.7	9913.03	14332.2	6917.86	6944.76	43678	10372.5	11189.2	8823.27	5163.24	10359.1	12926.9	15823.8	9805.69	1.61373	0.324781	0.303171
M155T425	154.94667	425.0610	nodiff									264952	185722	363833	273342	197811	267926	315538	300765	323986	349123	279626	316215	258931	314209	0.824073	0.0744784	1.9333
M197T32	196.97563	31.9465	nodiff									16353.1	28444.5	14258.1	18484.3	72958.9	15649.2	9432.69	13283.6	7674.04	2277.1	12684.2	8236.49	27691.4	8931.35	3.10047	0.0747132	0.774788
M675T177	674.53179	177.1500	nodiff									47382.8	34545.1	43934.3	48978.6	33074.9	45024.6	71564.7	99511.9	56607.1	20851.1	72893.8	55692.8	42156.7	62853.6	0.670713	0.0881818	0.87547
M101T17	100.96035	16.7160	nodiff									456919	498433	348548	474120	453988	421467	236024	448729	674031	678113	404145	615262	442246	509384	0.868197	0.39342	2.29872
M187T181	186.98379	181.0745	nodiff									2354.68	3783.81	4893.86	2074.45	8507.3	1501.87	1813.89	2889.5	1193.56	796.473	1725.65	1446.49	3852.66	1644.26	2.3431	0.0722378	0.236795
M883T187	882.75488	186.5380	nodiff									62834.5	64761.4	72709.4	65671.5	52628	75066.5	64710.4	78676	13881.5	6689.72	63005.1	32417.4	65611.9	43230	1.51774	0.105294	0.807782
M281T155	281.01348	154.5760	nodiff									37475.7	34564.1	25714.6	44285.8	21354	14865.8	35944.2	34153.5	35072.3	53857.1	21551.9	42086.5	29710	37110.9	0.800572	0.262225	0.644143
M256T35	256.02685	35.0810	nodiff									25468.6	26965	12536.5	23891.7	62643.9	2116.35	23232.4	25892	14803.6	7243.6	8566.31	4687.33	25603.7	14070.9	1.81962	0.234105	0.550029
M275T50	275.20071	50.1420	diff									8442.43	7951.09	8299.02	6967.45	4393.25	9990.04	27331.3	49151.8	66609.1	39949.7	38614.9	72548.9	7673.88	49034.3	0.1565	0.000180239	1.34756
M248T29	248.00481	28.6595	nodiff									11101.7	16919.3	6515.72	6483.32	11953.2	4653.56	23224	38945.5	32279.2	14922.9	10626.9	6284.1	9604.47	21047.1	0.456332	0.0657328	0.579966
M248T33	248.03291	33.3110	nodiff									7115.99	8005.87	2514.24	2647.68	4728.37	5020.25	8261.15	18683.3	2268.72	8563.47	2040.16	3523.81	5005.4	7223.44	0.692938	0.436446	0.161964
M645T36	644.59907	36.2910	nodiff									5224.86	10158.8	13153.2	6273.67	1655.18	40677.5	2559.76	1599.23	190.068	875.456	4401.3	1270.45	12857.2	1816.04	7.07979	0.0874863	0.537001
M730T144	730.47940	144.1005	nodiff									119604	110644	86127.4	117426	77251.1	43744.3	80157.5	64225.3	75989.4	71244.6	56216.3	69087.6	92466.1	69486.8	1.3307	0.0961985	0.595405
M121T71	121.02875	70.6310	diff									167377	191207	95538.2	200215	218623	60796.3	69413.3	69162.4	64113.5	61487.8	77112.7	62992.2	155626	67380.3	2.30967	0.00669618	1.54202
M283T167_1	283.05028	167.0180	diff									62535.2	95488	46471.3	61733.7	134416	59434.1	51584.3	62016	26929.1	23593.6	51684.2	29836	76679.7	40940.5	1.87295	0.0368734	1.10524
M283T177	283.15486	177.4690	nodiff									32168.6	39043.2	19238	12278.7	80395.9	23190.7	4303.21	7817.17	5144.96	5749.12	3650.2	4268.4	34385.8	5155.51	6.66973	0.0151992	0.950652
M417T177	417.33586	176.7880	diff									11597.3	6887.63	25275.4	8294.2	3644.06	5979.35	84899.8	133124	28010.2	5374.59	85160.2	55761.6	10279.6	65388.3	0.157209	0.0155526	1.41721
M333T45	333.20383	44.9500	nodiff									56868.1	27837.3	21043.5	48935.9	50923.3	14111.1	15479.2	9822.79	12894.2	13579.6	13495.5	13207.2	36619.9	13079.8	2.79973	0.00927164	0.766908
M189T407	188.93878	406.6805	nodiff									132603	114421	121568	119576	116119	189500	118452	123677	127598	147592	130375	119462	132298	127859	1.03471	0.730321	0.721986
M742T174	741.59058	173.8170	diff									23242.5	12746.1	24940.7	25097.1	11827.9	21156.6	95901.3	118729	46771.9	17144.6	81061.3	88294.9	19835.1	74650.4	0.265707	0.00470739	1.44626
M136T87	136.00663	87.0260	diff									39342.8	29945.4	31956.2	40132.7	39993.6	10068.8	121732	92071.5	184675	64178.2	39747.7	110531	31906.6	102156	0.312332	0.00764921	1.63334
M551T354_2	551.03098	354.0545	diff									133065	120796	113340	145354	142786	137082	120083	131893	12251.5	4953.15	104089	43770	132071	69506.6	1.90012	0.0237442	1.54292
M583T42	583.47030	41.5105	diff									30720.6	16752	28570.4	30151.7	14566.9	70477.8	47258.8	64048.6	53441.2	35182.8	111610	76082.2	31873.2	64603.9	0.493364	0.0385089	1.02332
M279T63	279.19619	63.2590	nodiff									23754.1	21818.8	9670.56	17050.3	58773.6	13797	29446.1	19176.3	8859.78	142317	20500.5	20268.2	24144	40094.6	0.602177	0.482168	0.67426
M417T360	416.89822	360.3140	nodiff									193057	288061	281497	286417	187248	318987	280288	288000	305811	177555	345624	296830	259211	282351	0.918045	0.487953	1.02449
M899T132	898.54725	131.6450	diff									332180	447962	218376	253248	309179	232267	141449	231879	140683	133155	130952	150341	298869	154743	1.93138	0.00365423	1.97943
M220T149	220.14618	149.0300	nodiff									177648	163187	179728	174314	153500	113262	173786	172582	493899	246254	196149	182065	160273	244122	0.656528	0.139303	1.99802
M409T173	409.18564	173.1035	nodiff									77860.7	19998.1	5151.4	46409.6	75932	26005.8	35036.5	62594.7	18922	16021.7	37356.2	20362	41892.9	31715.5	1.3209	0.49136	0.536894
M207T34_1	206.97142	33.8430	diff									56398	47175.1	9205.96	57151.9	13087.6	40569.4	6236.71	8976.04	5786.66	4025.76	5887.91	4642.91	37264.7	5926	6.28834	0.00474537	1.01605
M157T107	157.08646	106.8215	nodiff									14804.9	14269.1	315426	27808.5	16706.8	11964.8	253690	20499.7	246289	250047	23612	219034	66830	168862	0.395767	0.165766	2.16215
M363T46	363.18991	45.6030	nodiff									12765.3	3746.19	3729.23	25442.2	15369.5	94670.7	5028.28	27407.9	4414.31	14342.8	17621.2	20333.5	25953.8	14858	1.74679	0.464856	0.409457
M509T353	508.96123	352.5810	nodiff									2904.65	4878.75	4207.17	4080.3	4366.04	2852.37	4872.48	4874.35	1619.42	10728.2	3105.48	1592.88	3881.55	4465.47	0.869237	0.691153	0.163442
M423T191	423.25088	190.7545	diff									8688.82	11120.9	22524.3	5800.47	5699.7	6125.15	41961.7	29073.3	49994.4	35685.6	43034.1	58192.7	9993.23	42990.3	0.232453	5.72909e-05	1.22732
M101T70	100.96029	69.7510	nodiff									465623	447155	331557	409608	417312	267747	464787	328539	457283	438524	431955	459621	389834	430118	0.906341	0.305173	1.58288
M87T111	87.04471	111.0300	nodiff									4598.62	6644.84	4865.63	6202.17	4222.93	1727.08	2228.62	41366	3933.49	3061.94	5093.29	2542.55	4710.21	9704.31	0.485373	0.452317	0.291442
M719T148	718.53847	147.7890	nodiff									116279	140150	198605	136318	112466	170442	161865	177603	119628	97876.6	164415	154575	145710	145994	0.998057	0.988014	0.453857
M566T36	565.53827	36.2980	nodiff									5153.28	16696.8	11416.9	6571.56	7605.25	44964.6	6510.44	8645.38	7851.87	2610.69	5582.24	10991.1	15401.4	7031.95	2.1902	0.210948	0.409105
M554T175	554.26637	175.2510	nodiff									28732.4	2147.94	56732.4	27713.5	1658.85	37336.8	45438.3	2714.99	26648.4	1960.49	3927.14	27239.1	25720.3	17988.1	1.42985	0.510192	0.331013
M417T37	417.33331	36.6150	nodiff									17882.5	11365.3	24724.7	11015.9	21804.9	46325.7	9064.69	24301.6	16756.7	8186.9	14458.4	12950.6	22186.5	14286.5	1.55297	0.205772	0.327327
M459T190	459.24984	190.1520	diff									20834.7	10584.9	19948.3	19687.5	11713.7	5583.6	26480.5	15524.9	62510.5	61734.8	24736.7	36495.7	14725.4	37913.8	0.388392	0.0215312	1.05375
M147T5	146.96529	5.2275	nodiff									58784.8	61479.9	58199.1	68000.4	57251.7	194202	60763.3	63850.8	57507.4	50936.7	67367.1	60931.8	82986.3	60226.2	1.37791	0.333916	0.580951
M415T38	415.31935	38.4030	nodiff									22875.4	35702.8	38225.3	16526.8	30542.1	27081.7	35751.6	37980.1	47040.9	10598.6	24643.2	36648.9	28492.3	32110.6	0.88732	0.569812	0.320712
M848T143	847.62053	142.8845	nodiff									90377	87866.1	79468.4	90006.2	72819.7	102165	72991.9	76772.1	4706.13	47100.6	84679.7	66795.1	87117	58840.9	1.48055	0.0499719	0.809989
M311T178	311.22164	177.5085	diff									166790	82479.1	62803.8	194078	37730.8	244815	30500.2	45804	22573.7	10572.5	36091.1	22510.3	131449	28008.6	4.69318	0.0124015	1.81321
M131T169	130.88829	168.7170	nodiff									62287.6	45809.9	38712	44898.4	40188.9	198510	34614	25085.3	70966	87891	43052.5	43086.2	71734.5	50782.5	1.41258	0.461565	0.744444
M581T109	580.50121	108.8530	diff									26683.1	11081.5	30834.6	20117.9	6606.34	8765.93	94857.2	199267	117835	52782.5	164914	130251	17348.2	126651	0.136977	0.000466591	2.19086
M101T711	100.96022	710.8580	nodiff									151569	97142.3	101934	105400	99045.3	103492	80314.8	121412	77073.7	109932	84744.2	15645.7	109764	81520.4	1.34646	0.132307	0.596193
M520T50	520.24584	49.6540	nodiff									37492.7	29308.4	97970.1	38501.3	20437.2	17895	92080.8	96464.9	2088.84	3415.62	83483.2	12373.3	40267.4	48317.8	0.833388	0.728634	0.510866
M541T355	540.91206	355.1140	nodiff									236018	240243	234804	228053	232482	227617	237982	234354	88962.8	44113.1	231688	177467	233203	169094	1.37913	0.0905844	1.38208
M197T40	197.15406	40.0100	nodiff									41368.8	31238.4	53751.8	45195.1	61944.3	47190	33484.9	37345.9	28155.9	26839.3	52821.8	38175.4	46781.4	36137.2	1.29455	0.0940619	0.367163
M787T354_1	786.92223	354.0690	diff									137377	125884	123462	148284	145666	136006	123105	138474	13823.8	5942.38	123685	50813.4	136113	75974	1.79158	0.0351896	1.49743
M463T171	463.34131	171.2340	nodiff									70064.1	61553.9	68765	90172.3	46662.6	64066.9	70334.9	97594.9	19082.3	77651.9	84158.5	36583.4	66880.8	64234.3	1.0412	0.849377	0.137239
M168T192	168.00759	192.1980	nodiff									1396.16	29464.3	3759.87	2093.95	58187	1701.06	2009.28	1220.49	37763	23047.1	1475.25	22594	16100.4	14684.9	1.09639	0.903699	0.0990905
M531T63	531.44099	62.7190	diff									17666.9	7239.6	20681.8	14481	6447.43	5540.1	58288.7	84943.9	91569.4	52604.2	64415.6	80992	12009.5	72135.6	0.166485	6.13008e-06	1.66814
M211T54	211.16976	53.5250	nodiff									18993.4	8830.89	14903.2	29734.7	4493.67	54818.9	12797.8	17311.4	19718.3	21473.3	19063	13811	21962.5	17362.5	1.26494	0.558733	0.356575
M213T89	213.14890	88.5100	nodiff									137033	122423	106848	137296	34267.1	98570	166200	311155	130487	63141.5	160209	147957	106073	163192	0.649989	0.151718	1.28481
M307T387	307.11378	387.0950	nodiff									26194.6	21433.5	66294.1	26718.7	8404.74	27629.9	63680.1	60374.2	33947.7	12475.7	56260	42904.9	29445.9	44940.4	0.655221	0.197683	0.659701
M541T182	541.30355	181.6745	nodiff									27528.3	14360.8	26394	25569.1	16577.8	13460	63428.8	72628	27782.2	14228.3	53925.7	29083	20648.3	43512.7	0.474536	0.041747	0.91519
M192T167	192.05067	167.3305	nodiff									41760.7	46215.1	48483.4	44425.5	32118.7	40089.3	41870.1	39504.6	49256.8	72526.2	49927.8	34540	42182.1	47937.6	0.879939	0.356742	0.68505
M293T576	292.89057	576.0720	nodiff									219818	318372	89425.8	81213.7	266348	79484.4	328410	356728	107499	245071	364120	338867	175777	290116	0.605886	0.0824222	1.87939
M358T38	358.20522	38.1230	nodiff									34875.3	27609.2	25583.6	27249.8	6406.16	20400.9	4851.64	7608.37	2201.69	1168.08	1886.51	1303.02	23687.5	3169.88	7.47267	0.000513074	0.837847
M785T142	784.58646	142.4070	diff									149608	113568	90358.8	157455	118578	101650	99009.9	70229.1	53201.2	47157.3	111737	64261.5	121869	74266.1	1.64098	0.0102413	1.1364
M291T25	291.06899	24.5900	nodiff									26602.6	5490.22	5941.3	29656.1	12342.7	5571.17	13689.4	6673.77	3524.04	4295.38	11052.4	5446.15	14267.3	7446.85	1.91589	0.187312	0.324055
M260T25	259.95425	24.6100	nodiff									4350.72	31749.7	10052.3	17388.6	23586.1	27982.4	3013.06	2367.33	9449.03	4096.84	947.455	994.595	19185	3478.05	5.51601	0.00592789	0.717074
M334T37_2	334.20488	37.2155	nodiff									49883.7	28911.8	18420.6	32881.3	24903.8	20739.3	10235	16657.5	10032.6	5296.42	6465.98	6632.83	29290.1	9220.05	3.17678	0.00229894	0.770312
M425T89	425.36222	88.8075	diff									17978.1	9332.75	15606.2	13117.9	5986.22	7261.69	186412	226966	211483	89212	181590	233024	11547.1	188115	0.0613836	9.79601e-06	2.78199
M113T296	113.02374	296.0970	nodiff									85793.6	96464.7	157746	86409.2	35418.2	104247	172808	177535	105973	60032.2	177223	136433	94346.5	138334	0.682019	0.1123	1.22159
M519T110	519.40392	109.5290	diff									44724.1	25325	63122.2	33551.7	13236.9	8430.73	106467	192997	100503	43118.4	102594	98073.6	31398.4	107292	0.292644	0.00525582	1.77561
M663T40	663.32693	40.0315	nodiff									11858	14387.4	11122.9	10624.5	19973.6	4927.81	7318.55	10946.4	1240.87	2040.73	9908.9	9724.76	12149	6863.37	1.77012	0.0742739	0.399264
M479T27	479.31897	26.7150	nodiff									74159.1	37450.7	40437	61517.5	20058.2	67467.5	42762.3	46282.3	28338.7	8133.07	30334.7	31176.9	50181.7	31171.3	1.60987	0.0895845	0.609965
M383T163	383.01165	163.1750	nodiff									135972	138721	164253	105375	130103	116826	128862	146263	115410	87041.5	136641	131976	131875	124366	1.06038	0.54109	0.339904
M147T20	146.96536	20.0340	nodiff									95426.1	88007.4	57679	46355.3	61597	259155	58250.4	83411.7	83550.7	68741.9	77743.8	75925.8	101370	74604	1.35877	0.432265	0.612323
M464T191	464.27711	191.4070	diff									24929.2	30953.8	38451.2	21565	21094.5	22870	56143	47433.4	83494.9	63998.4	53223.3	67108.7	26644	61900.3	0.430434	0.000138071	1.29859
M293T41	293.21158	40.5640	nodiff									45993.6	38538.3	31882.6	44740.1	13330.8	41320.1	49797.4	65296.6	48870.6	35967.2	51116.4	59216.3	35967.6	51710.8	0.695553	0.034488	0.819463
M930T179	929.59614	179.1395	nodiff									14657.1	12117	50103.5	15053.7	5602.55	14717.8	29584.3	24229.1	7926.86	1879.06	27821.7	18323.7	18708.6	18294.1	1.02266	0.95924	0.081256
M165T344	165.01841	343.6390	nodiff									19840.9	9044.71	123627	14769.3	61752	11179.1	60183.3	74491.6	10413.8	14809.6	49470.3	10668.3	40035.6	36672.8	1.0917	0.880611	0.304238
M327T33	327.16292	33.2240	nodiff									3513.04	19071.5	8394.11	67379.6	4306.05	28764.5	4049.13	8426.31	1573.29	2505.08	16127.5	6270.02	21904.8	6491.89	3.37418	0.160187	0.588724
M507T360	506.83090	360.4300	nodiff									152128	228896	221764	153611	152964	150902	221848	225586	266436	165944	208738	163732	176711	208714	0.846665	0.179691	1.29573
M699T44	698.55779	43.7100	diff									125257	196484	119367	136736	120670	235217	10962.3	33843.4	931.161	1821.19	21414.2	10837.8	155622	13301.7	11.6994	3.97887e-05	2.37463
M721T108	721.48107	107.5690	nodiff									106325	224357	117750	150994	132108	92887.4	100969	225634	6683.05	7225.93	126723	7473.96	137403	79118.2	1.73669	0.187308	1.33069
M261T419	260.87287	419.4310	nodiff									55184.8	49585.1	58267.4	55224.8	54166.9	61214.3	47725.8	47758.4	51488.8	49010.8	55301.2	54722.4	55607.2	51001.2	1.09031	0.0550218	0.406499
M555T290	555.15439	289.8880	nodiff									177905	192438	127144	134177	167587	152277	148324	171019	210371	144254	179305	155076	158588	168058	0.94365	0.527359	0.837444
M307T221	307.03389	221.1675	nodiff									74207.4	38630.2	68730.5	37495	29380.5	58154.7	99366.4	125707	23394	6715.99	108595	51968.5	51099.7	69291.2	0.737463	0.413899	0.74744
M723T107_1	722.50934	107.4815	nodiff									147732	127274	106775	101349	177412	74613.2	355549	386066	4604.66	4939.44	285256	4985.97	122526	173567	0.705929	0.527959	1.62543
M157T70	157.12263	69.7510	nodiff									464770	363367	490301	440059	406588	341265	460253	411895	430308	449144	379770	381674	417725	418841	0.997336	0.968395	1.48368
M371T171_1	371.25219	171.2350	nodiff									2018.15	2154.54	4454.7	1950.22	2413.13	1967.88	1974.72	990.069	9755.9	15074.3	13395.6	32408.6	2493.1	12266.5	0.203245	0.0636329	0.578085
M293T45	293.24770	45.1990	nodiff									6333.49	3932.17	11526.7	26590.2	10941.1	8256.29	7578.79	9279.72	27490.9	5151.37	11012.7	7344.46	11263.3	11309.7	0.995903	0.992288	0.16964
M433T42	433.36689	42.2950	nodiff									9594.08	3731.16	10003.8	13012.9	5680.89	7655.83	32129.6	17232	38842	29983	12969.3	28214.4	8279.78	26561.7	0.311719	0.00138029	0.884965
M896T182	895.57329	182.3400	nodiff									46494.2	21431	44815.6	50633.9	29836	44800.5	56987.6	54446.9	9827.43	3647.53	56674.5	36373.8	39668.5	36326.3	1.09201	0.766177	0.396415
M581T41	581.45490	40.9335	nodiff									26781.6	17962.3	23995.5	22596.5	10704.7	14047.7	40781.4	52026.5	41072.1	26895.2	27345.2	43565.1	19348	38614.3	0.50106	0.00224309	0.936685
M535T82	535.47200	81.7125	diff									58782.9	25992	60572.1	74307.6	28419.2	41562.6	244510	227772	156043	81505.2	155893	158348	48272.7	170678	0.282829	0.0006731	2.23324
M660T179_1	659.51304	178.8135	nodiff									98266.5	71152.1	79015.5	91132.6	68093.2	79159.7	90287.5	108025	54748.8	23659.8	96823.3	62353.5	81136.6	72649.7	1.11682	0.549949	0.404534
M468T191	468.24776	191.4005	diff									27486.9	27198.2	39410.9	23566.7	21605.7	25684.6	46622.5	48712.7	67351.5	54678.2	55768.8	59537.1	27492.2	55445.1	0.495845	3.69741e-05	1.18165
M483T360	482.86974	359.6110	nodiff									157596	169643	170836	166503	256387	233614	168258	245117	241566	160524	166328	263508	192430	207550	0.927148	0.569325	0.789194
M754T140	754.47746	139.8530	nodiff									83535.6	16136	13382.6	34156.9	20946.9	10261.4	12014.2	8519.98	11810.3	11254.5	23411.4	23658.4	29736.6	15111.5	1.96782	0.236375	0.362611
M546T32	546.41801	32.0150	nodiff									7623.38	14971.1	40711.8	31039.8	6054.67	35362.2	5503.23	4719.74	2432.55	1403.71	3619.7	4163.95	22627.2	3640.48	6.21544	0.0113666	0.769011
M191T25	190.98185	25.2150	nodiff									11342.6	8976.47	3841.56	7306.59	16056.3	2904.79	6087.82	9288.49	11071.6	7894.58	4251.09	3162.89	8404.72	6959.41	1.20768	0.552071	0.0244868
M238T36	238.31416	35.6920	nodiff									35288.5	37551.8	35084	30919.8	26186.6	31777.8	39596.2	32234.7	25370.2	27214.2	26551.4	34660.8	32801.4	30937.9	1.06023	0.522251	0.25813
M492T180	492.34444	180.0730	nodiff									34137.3	34594.6	35749.4	38184.7	39023.8	27705.4	67939.9	55730.7	25502.9	10723.6	63460.6	34956.2	34899.2	43052.3	0.810623	0.409928	0.61315
M449T106	449.36202	106.4245	diff									43829.4	28911.4	52811	50226.5	11444.9	16471.1	179048	200270	157706	66877	101127	307974	33949.1	168834	0.20108	0.00329163	2.23107
M221T664	221.14965	663.9750	nodiff									38707.3	6971.12	375499	22389.5	180261	73086.7	85927.8	202649	69065.1	66260.4	37105.8	89606.3	116152	91769.1	1.2657	0.703703	0.0736738
M224T35	223.75584	35.0730	nodiff									14372.3	16905.1	12774	10985.7	10736.8	16196.9	15230.7	14430.4	9302.53	8695.39	11024.7	15089.5	13661.8	12295.5	1.11112	0.417979	0.0853013
M721T354	720.95049	354.0395	diff									141164	131252	125457	146613	146608	146284	132810	140621	17630.5	6618.37	127568	57306.9	139563	80425.7	1.73531	0.0403499	1.48043
M77T341	76.96985	340.6900	diff									245235	223028	222368	230100	218982	240881	301769	261736	259581	258175	229351	245298	230099	259318	0.887323	0.0218618	1.33087
M633T33	633.43911	33.2035	diff									9403.67	1107.03	5803.53	5596.95	1597.78	1532.37	52001.3	66743.8	31620.9	16548.2	54432.8	38105.6	4173.55	43242.1	0.096516	0.000392372	1.28794
M397T28	397.22576	28.2570	nodiff									14583.5	12329.6	16067	19989.1	12847.6	25227	16727.3	33642.5	15057.3	13409.4	25937.9	13190	16840.6	19660.7	0.856562	0.491492	0.232363
M428T162_2	428.09813	162.0030	nodiff									58363.1	71427.9	142832	54354.8	34495.4	57887.1	86748.4	97091	65866.7	34596.1	100543	81920.7	69893.4	77794.3	0.898438	0.675729	0.506023
M381T32	381.09972	32.0550	nodiff									1864.89	274.652	206.977	743.486	1243.72	7961.02	2694.42	9260.9	2626.72	887.312	2442.05	2200.52	2049.12	3351.99	0.611316	0.464347	0.111682
M187T387	187.07161	386.9760	nodiff									22708.2	16833.2	58543.8	21516.6	8586.31	22500.6	51640.2	51927.5	26988.1	10129.5	51516.9	36976.7	25114.8	38196.5	0.657515	0.216248	0.608551
M329T170_2	329.18938	170.2960	nodiff									3787.52	4951.4	16191.8	2496.99	4985.92	6547.31	68866.3	61486.6	27624.2	7169.5	23310	22650.4	6493.49	35184.5	0.184555	0.0179208	0.952814
M564T63	563.50177	62.7160	diff									25352.4	9378.64	24506.4	18821.7	10117.2	7033.59	41235.4	70077	77452.3	86123.7	46963.6	54782.4	15868.3	62772.4	0.252791	0.000158223	1.44926
M534T184	534.35506	184.1195	nodiff									34653.5	29181.2	42323.2	29755.7	20138.4	25712.8	53899.3	59819.9	38430.7	30718.1	79481.1	40216.4	30294.1	50427.6	0.600745	0.028872	0.928278
M221T701	221.14966	701.4960	nodiff									83590	115457	98083	104299	13084.8	279019	111076	163093	65971.6	55103	9370.26	89760.4	115589	82395.7	1.40285	0.445549	0.781673
M848T131	847.58480	131.2790	nodiff									149906	70399.4	82814.3	60985.7	109114	67464.4	109187	86326.9	52671.6	44227.9	62894.4	74673.1	90114.1	71663.5	1.25746	0.300377	0.380415
M87T149	87.00820	148.9270	diff									66389.4	53650.9	60660.6	60718.9	27456.4	66285.5	157872	241389	130307	68128.9	178715	157485	55860.3	155650	0.358885	0.00195213	2.05519
M80T99	79.95683	99.4600	nodiff									79277.4	137888	88174.3	115052	679635	77262.3	83372.1	54848.5	48687.3	133734	84650.7	99025.3	196215	84052.9	2.33442	0.278956	1.5216
M183T165	182.94935	165.0850	nodiff									3710.64	2017.99	296290	280397	19111.8	179758	6855.84	9067.62	12925.9	4234.57	8902.55	5208.22	130214	7865.78	16.5545	0.0573537	1.75868
M241T342	241.09105	342.0080	nodiff									46506.9	26780.5	40704.4	42922.8	76850	43237.2	14913.8	19684.1	9790.33	10663.2	34233	17386.9	46167	17778.6	2.59678	0.00409069	0.966273
M228T170	228.02748	170.0410	nodiff									143835	188947	196649	170027	117013	134133	199896	185747	85866.7	203495	188476	158449	158434	170322	0.930205	0.604937	0.759914
M513T180_1	512.66590	179.8800	nodiff									9823.55	1331.07	10792.6	25108.3	6725.96	29668.8	534.029	2904.28	436.484	834.707	1109.74	590.629	13908.4	1068.31	13.019	0.0176261	0.633962
M217T416	216.90872	415.7355	nodiff									48650.2	51145.4	45127.2	48721.2	70671.7	45558.2	44413.4	43988.3	31016.3	26827	46051	41711.9	51645.7	39001.3	1.3242	0.0327774	0.562896
M915T187	914.58501	186.5770	nodiff									51194.1	42872.3	48638	44408.9	36721.6	49510.6	51294.5	51467.5	7668.77	5774.29	61844.8	21514.4	45557.6	33260.7	1.36971	0.258883	0.593758
M714T142	713.50968	142.2750	diff									121473	79160.6	57685.7	79048.6	81403.1	50910.3	35259.1	39975	26097.2	17667.9	31901.1	40233.7	78280.2	31855.7	2.45734	0.0014655	1.1601
M435T108_1	435.24993	107.8610	diff									14160.4	16147.9	27274	24694.9	12576.8	16836.8	87040.9	11348.6	74707	42464.4	114478	97364.5	18615.1	71233.9	0.261324	0.00737892	1.40253
M155T410	154.94668	409.5255	diff									142999	138853	143471	135349	92053.8	129604	152425	126708	158180	158964	160477	153239	130388	151666	0.85971	0.0486288	1.24536
M759T143	758.51022	142.8840	diff									116318	109440	76249	79416.4	95269.5	68299.5	51496	57228.6	42962	37013.6	55683.2	44557.4	90832.1	48156.8	1.88617	0.000532794	1.1166
M361T41	361.23540	41.2610	nodiff									43992.5	31912.4	23404	12293.8	27740.4	72143.2	19382.5	24446	21231.3	13419.7	21409.8	17484.9	35247.7	19562.4	1.80181	0.0998466	0.552005
M222T173	221.99363	173.2170	nodiff									6852.86	9092.39	4024.19	11123.3	5727.75	4371.43	6731.36	6202.31	5672.35	5694.63	4868.55	4219.68	6865.32	5564.82	1.2337	0.301599	0.117521
M779T354_2	778.99245	353.9670	diff									106219	90927.2	86872.7	104357	103622	97067.3	91134.7	98346.2	7889.8	2133.78	83204	31351.6	98177.4	52343.3	1.87564	0.029735	1.30432
M505T34	505.35604	33.8390	nodiff									9094.39	8054.23	10156.7	1553.28	2830.53	4790.03	20112.9	32740	15801.5	8864.32	22181.2	15516.2	6079.86	19202.7	0.316615	0.00444614	0.741845
M363T40	363.32555	40.0000	nodiff									19816.1	16700.4	18743.4	23013.1	11871.3	22097.7	21369.8	22871.4	7507.51	8505.61	19532.2	14981.6	18707	15794.7	1.18439	0.378469	0.183224
M181T254	180.99962	253.5020	nodiff									44901	24530.8	26105.6	46814.2	27871.1	12261.7	26910.2	20111.5	79498.7	18306.5	31359.8	41983.6	30414.1	36361.7	0.836431	0.592123	0.515974
M129T297	129.01864	296.9090	nodiff									53439.4	36848.2	64567.7	15486.2	30455.4	38672.7	45802.6	42281.3	38144.8	31020.1	76200.5	29109.8	39911.6	43759.8	0.91206	0.706335	0.371389
M198T140	198.03352	139.8580	nodiff									95041.3	87712.2	104416	89704	115074	54246.9	143826	217242	13218	8008.22	185621	69928.9	91032.4	106307	0.856314	0.690994	1.12694
M95T691	94.98030	690.6780	nodiff									75136.1	97051.9	77826.4	80885.5	95827.6	107808	107040	90308.7	119386	114791	32256.4	52167.1	89089.3	85991.4	1.03603	0.846412	0.642122
M529T104	529.42489	104.2580	diff									36064.9	18337.8	45014.8	34905.5	16562.2	25626	93720.9	208056	271050	71995.7	79902.8	232713	29418.5	159573	0.184358	0.00480639	2.26333
M202T181	202.10776	181.0680	nodiff									9924	7596.4	15183.4	7175.07	11042.8	7343.44	30037	33677.6	24744.3	13806.5	37790.6	31550.4	9710.85	28601.1	0.339528	0.000428964	0.932231
M255T610	255.23210	610.4590	nodiff									476469	490170	469577	419006	471819	221228	496592	466690	485283	490818	272162	462751	424711	445716	0.952874	0.708882	1.52895
M150T47	149.99381	47.3730	nodiff									193353	199113	187560	189055	195243	112895	189165	170963	229919	242044	188266	181729	179536	200348	0.896124	0.269584	1.24595
M856T120	855.50537	119.9690	nodiff									125859	137140	125675	113472	109005	122734	291230	289104	196947	111645	106625	109216	122314	184128	0.664289	0.121466	1.28952
M129T168	128.89135	168.4300	nodiff									41707.5	45981.6	28438.7	42780.4	52254.7	173169	31429.9	34221.3	63722.5	78719.5	30732.6	38149	64055.4	46162.5	1.38761	0.464716	0.636167
M205T26	204.99851	25.5080	nodiff									25597	21413.5	15622.9	20567.7	26800	12018.4	20433.3	22813.5	28291.4	18779.8	16558.2	17221.7	20336.6	20683	0.983253	0.908172	0.223237
M150T705	149.99382	705.1060	nodiff									151855	108513	134894	76336.6	80375.7	180712	105125	125288	71294	14284	85522.8	97438.9	122115	83158.8	1.46845	0.121035	0.791626
M501T109	501.39339	109.1205	diff									25159.1	13422.9	41774.6	27387.5	11411.8	16692.6	70572.4	153057	104634	36948.7	65708.4	89602.2	22641.4	86753.7	0.260985	0.00349983	1.61995
M718T139	718.48120	139.2860	nodiff									6507.23	8635.76	8898.01	12944.9	7652.33	6647.02	22040.5	17024.6	13986.8	12022.1	25933.1	19893.6	8547.55	18483.4	0.462443	0.00163171	0.643819
M101T656	100.96032	656.1095	nodiff									101433	58148.8	56031.3	57650	60200.1	56558.7	122516	119057	90140.2	14627.1	178366	10624.7	65003.6	89221.8	0.728561	0.405129	0.861703
M250T8	249.97550	7.8990	nodiff									132957	176539	126731	134000	108474	59537.9	118595	96055.2	103073	110947	541262	129765	123040	183283	0.671311	0.431175	1.17832
M267T29	267.00770	29.0820	nodiff									25297.3	42383.6	13375.2	29644.6	70158.7	14033.9	10876.9	12200.9	6897.86	8983.25	9204.87	7752.43	32482.2	9319.36	3.48546	0.0245505	0.842304
M413T26	412.97676	25.5600	nodiff									6332.86	6057.68	3440.35	549.306	11064.4	5968.3	2277.59	2942.79	2073.4	2674.52	1872.74	2687.5	5568.82	2421.42	2.29981	0.0530108	0.265884
M823T123	822.53223	122.9230	diff									211131	399257	308923	268290	410409	293102	200304	217008	52374.8	108297	166785	158236	315185	150501	2.09424	0.0021338	2.40837
M567T36	566.54669	35.6910	nodiff									4957.99	10270.7	10141.1	6830.91	6030.65	42017.8	6076.62	4653.57	892.873	3366.75	500.177	4087.33	13374.8	3262.89	4.09908	0.115398	0.507038
M899T140_2	898.62333	139.5940	nodiff									24857.2	21931.8	2817.41	3883.14	2438.5	24256.2	38850.1	32782.4	15292.4	16603.8	22769.1	32334.8	13364.1	26438.8	0.505471	0.0569386	0.573482
M553T111	553.48162	111.3830	diff									22273.6	8236.58	18500.5	21081.3	9442.24	4668.11	151826	265446	106882	86412.8	171923	102230	14033.7	147453	0.0951741	0.000622656	2.35589
M230T28	230.01300	28.2730	nodiff									23689.2	49289.7	8116.22	33362.6	38764.2	9790.25	8422.87	9383.21	7988.08	2765	5374.1	2510.04	27168.7	6073.88	4.47304	0.0111311	0.802718
M954T26	953.59923	25.8905	nodiff									5569.22	4042.38	7771	8322.16	684.785	31249.6	5157.21	4812.13	2557.12	665.729	3871.71	3894.01	9606.52	3492.98	2.75023	0.206353	0.363745
M242T31	242.01238	31.3875	nodiff									58599.5	30719.5	19501.5	47872.8	47252.2	7109.12	6263.05	6965.11	11262.4	11707.9	13678.6	1960.81	35175.8	8639.65	4.07144	0.00876551	0.813115
M729T354_1	728.88061	354.3030	nodiff									142716	135171	128144	141380	142502	138898	134714	140008	25614	10996	131969	72720.3	138135	86003.7	1.60615	0.0534053	1.36226
M329T110	329.17464	110.0440	nodiff									29264.1	25950.1	6113.5	121657	93245.6	19889.1	12691.7	14700.9	4104.65	2284.96	13084.4	3506.52	49353.2	8395.53	5.87851	0.0581696	1.08214
M248T25	247.98636	24.9450	nodiff									9568.73	3602	4111.48	4152.72	4809.13	1312.89	17910.9	25430.7	30317.8	3468.83	1362.89	788.384	4592.83	13213.2	0.347592	0.144703	0.451958
M228T131	228.02716	131.3590	nodiff									61918.7	74110.2	63981.8	72145	43190.6	54417.5	75579.4	67249.6	244460	211268	64106.9	107301	61627.3	128327	0.480235	0.0687861	1.82698
M628T183	628.35902	183.2640	nodiff									6890.52	5241.1	14178.3	5779.8	4487.21	7263.13	6949.47	8716.87	54427.2	43236.4	10167.1	20367.4	7306.68	23977.4	0.304732	0.073522	0.907781
M209T61	209.11747	61.1450	diff									9486.39	5473.68	8034.34	6398.85	4160.98	7041.23	32929.7	34456.5	21757.6	24811.7	45464	31847.1	6765.91	31877.8	0.212245	2.83936e-05	1.04794
M209T77	209.06661	77.1965	nodiff									2355.77	1636.22	4423.91	2249.83	12352.2	5391.5	9472.67	17028.5	1828.53	3427.29	18084.2	7654.65	4734.9	9582.65	0.494111	0.162125	0.448777
M259T669	258.92063	669.3760	nodiff									57597.5	51896.5	50664	52363.9	55879.9	61247.3	72649.9	207247	49029.5	58766	41239.5	72160.8	54941.5	83515.5	0.65786	0.285383	0.775208
M901T188	900.53208	188.1535	diff									59288.4	64576.3	53550.1	57127	47057.8	57653.5	34935.1	31836	6815.27	7908.53	25862.6	19403.4	56542.2	21126.8	2.67632	6.65216e-05	1.16269
M186T344	186.08769	343.9620	nodiff									28202.6	14867.2	19353	30831.3	13363.9	30118.8	40667.4	60313.6	35873.5	24596.3	32287.5	32386.3	22789.5	37687.4	0.604696	0.0313521	0.733213
M205T27	204.98083	27.2320	nodiff									21295.3	13249.1	10925.1	14227.3	29300.1	2758.36	7648.76	14792.9	22640.1	3677.38	5552.52	4220.31	15292.5	9755.33	1.56761	0.276673	0.190747
M437T106	437.36192	105.9410	diff									19597.3	4868.93	12885.5	17945.6	4802.39	5133.33	116139	144122	132693	73879.4	138633	136482	10872.2	123658	0.0879213	1.3114e-06	2.26345
M131T409	131.08188	409.3890	diff									131419	144074	146229	139506	90433.7	139036	69455.8	46688	46827.7	47070.3	59237.4	51239.7	131783	53419.8	2.46693	7.60717e-06	1.70559
M150T10	149.99395	9.9320	nodiff									53274.9	168362	360939	399022	76855.8	143965	135437	120125	402488	398538	486810	389690	200403	322182	0.622019	0.190861	2.37957
M601T36	600.50853	35.7050	nodiff									15094.5	22431.6	17791.5	15592.2	6563.13	30674.9	2644.92	3377.62	1253.24	552.215	1435.78	2656.96	18024.6	1986.79	9.07224	0.000694239	0.768762
M459T181	459.30969	181.0750	nodiff									6372.64	4055.95	6360.79	7051.63	3878.38	3618.72	22468.7	35508.3	10228.6	28249	19314.3	18365.4	5223.02	22355.7	0.233633	0.000790254	0.781671
M196T156	196.01055	155.9330	diff									139433	169687	207954	6492.46	207541	73866.6	11458.1	7262.24	20226.2	96363.1	5029.22	39994.8	134162	30055.6	4.46381	0.0153048	1.4928
M131T125	131.07067	125.0350	diff									122023	27570.4	34698	105410	154830	55112	31337.1	50644.7	3678.03	2681.29	22810.5	10245.8	83274	20232.9	4.11577	0.0184891	1.42945
M82T25	81.95252	25.2350	nodiff									16261.6	22019.8	5913.03	7385.72	39724.8	9877.11	4498.73	5610.26	8273.14	5799.56	1912.11	4261.2	16863.7	5059.17	3.33329	0.0486723	0.540145
M271T77	271.22708	76.7910	nodiff									121114	51847	59827.5	61614.2	22748	54542.3	97356.6	162617	73329.8	33792.4	112634	93397.6	61948.8	95521.2	0.648535	0.155192	1.02474
M585T186	585.35004	185.7595	nodiff									12805.7	9964.45	14602.7	11447.7	12841.7	9666.31	24147.7	19989.1	47032.7	48969.6	24108.7	13213.7	11888.1	29576.9	0.401939	0.0158914	0.858457
M869T354_1	868.92594	353.9150	diff									102494	92455	84592.2	106325	103782	94699.1	86565.5	95896.1	6965.1	2609.88	84412.8	30192.1	97391.1	51106.9	1.90563	0.026155	1.31851
M296T40	296.22882	39.9960	nodiff									26499	21401.3	17043.8	25282.8	9390.44	16387.4	20813	28765.4	14817.8	16444.7	10766.4	32021.4	19334.1	20604.8	0.938332	0.772394	0.263202
M123T127	122.97472	126.6050	nodiff									91179.3	83012.6	63610.6	74121	269369	53056.3	76071.7	72875.8	117752	63026.1	36629.6	55598	105725	70325.5	1.50336	0.335651	0.605623
M231T223	231.03513	222.5320	nodiff									12247.6	8384.52	16452.4	27673.7	9044.91	17171.4	10663.4	15544.2	9367.42	5390.59	15141	15285.3	15162.4	11898.7	1.2743	0.354934	0.164706
M172T26	172.45442	25.8250	nodiff									9899.86	46710.5	5896.04	49282.4	31751.3	21493.1	4386.59	4608.83	10270.8	9183.82	6564.03	4299.54	27505.5	6552.27	4.19786	0.0195654	0.782954
M483T182	483.24801	182.2530	nodiff									57802.2	41733.1	14548.4	41988.5	36563.5	2723.81	6590.58	10074.2	44526.6	29781.5	58685.9	17862.3	32559.9	27920.2	1.16618	0.701208	0.155563
M180T82	180.03274	81.6940	diff									122481	50621.7	52141.2	61973.8	131747	32576.2	136337	316204	182277	99052.7	162275	249503	75256.8	190941	0.394136	0.0100209	2.17426
M345T175	345.15411	174.8800	nodiff									25560.1	27181.2	16259.4	23697.8	41048.3	25165.6	11817.7	11622.7	5007.54	3184.64	13698.9	7156.1	26485.4	8747.92	3.02762	0.000772543	0.834389
M884T59_1	883.53573	59.1005	nodiff									11206.5	50921.3	15339.5	52797	33023.7	19513.1	12142.1	17510.5	11768.9	23216.5	10416.7	11802.2	30466.9	14476.1	2.10462	0.0637089	0.58971
M80T170	79.95685	170.4315	nodiff									163536	105199	51611.6	144633	276124	125781	117621	227892	220488	99019	220938	98779.2	144481	164123	0.880321	0.638621	0.859983
M819T471_1	818.85451	471.4130	nodiff									19553.9	29655.8	25987.2	16938.8	44010.4	16174.1	16974.1	18437.2	6854.34	6562.09	21981.9	14599.3	25386.7	14234.8	1.78342	0.0503566	0.586836
M195T60	195.01447	59.8730	nodiff									4217.23	5566.96	6135.4	4945	6035.37	3148.25	3866.41	5176.07	3116.8	1854.57	6150.19	6782.41	5008.04	4491.08	1.11511	0.579378	0.0735277
M195T69	194.99625	69.0535	nodiff									6345.56	8368.77	3327.28	7372.32	5615.42	4414.04	7384.06	8059.68	6680.85	5641.09	9088.9	7341.95	5907.23	7366.09	0.801949	0.135835	0.224708
M271T35	270.97591	35.0810	nodiff									15493.6	26217.7	12408	20701.3	84166.4	10302.2	8777.47	12004.1	10919.3	3618.38	10478.2	6501.1	28214.9	8716.43	3.23697	0.121073	0.748046
M467T159	467.37264	159.2800	diff									53122.1	22901.1	32204.7	57910.6	18730.9	26984.1	110886	236819	90660.2	46457.5	88374	89646.3	35308.9	110474	0.319613	0.021128	1.62805
M150T670	149.99376	669.7275	nodiff									35272.8	10658.7	141118	63806.3	161506	84040.5	133250	75287.5	77576.3	76821.4	118105	85740.5	82733.7	94463.3	0.875828	0.663392	0.546297
M245T28	245.04825	28.1440	nodiff									18271	33904.6	11627.4	11767.8	22455.3	6902.55	9734.37	14710.4	17521.3	10635.5	7097.05	4930.79	17488.1	10771.6	1.62355	0.158809	0.266783
M279T126	279.23272	126.2090	diff									213831	152473	181314	199822	185769	139667	166597	180593	35811.7	26897.2	171095	68459.5	178812	108242	1.65197	0.0496567	1.48955
M188T238	188.04502	238.1490	diff									124602	103668	130218	126575	82766.7	105427	153902	168255	294902	173534	160310	140805	112209	181951	0.6167	0.0164829	1.83587
M477T34	477.35731	33.8210	nodiff									11369.8	7453.75	13390.5	13742.7	4795.76	8040.93	12644.9	13617.7	2045.24	1100.61	5743.4	2170.07	9798.91	6220.32	1.57531	0.216559	0.256148
M555T63	555.43992	62.8110	diff									11634.9	5236.6	11834.5	11173.2	4017.7	4102.14	28713.9	41480.6	63885	35747.4	35007.6	45436.7	7999.83	41711.9	0.191788	7.8063e-05	1.24325
M753T55	752.51569	55.4225	nodiff									15968.5	13387.2	18410	15508.8	10328.6	22088.5	13348.8	9915.41	10668.4	19119.6	14400.8	8704.06	15948.6	12692.8	1.2565	0.181872	0.314251
M531T156	531.27192	155.8270	nodiff									34668.5	14611.5	77376.3	14222	14541.6	7589.57	20760.5	22089.5	13535.2	11770.5	23818.5	16824.6	27168.3	18133.1	1.49826	0.426439	0.225825
M499T357	498.90085	356.6675	nodiff									120088	196502	166971	194521	201558	204322	204725	200707	112622	67384.3	187985	190099	180661	160587	1.125	0.470253	0.69607
M241T419	240.89531	418.8220	nodiff									18913.5	16911.8	20315.1	19741.9	20941.3	29600.9	20739.7	20013.2	22065.7	22609.5	21935.5	23370.7	21070.8	21789.1	0.967033	0.708517	0.299467
M568T190	568.36008	189.5850	diff									12662	7303.68	18613.3	8668.29	12761.9	9896.57	30555.6	19735.6	53512.3	38340.8	37056.4	47525	11651	37787.6	0.308328	0.000497192	1.0939
M811T354_1	810.88388	354.0895	nodiff									118899	112795	100906	115832	118793	116327	113841	116330	11774.1	4302.16	107782	47477.4	113925	66917.9	1.70246	0.0537622	1.3191
M293T224	293.03293	223.8640	nodiff									23412.6	4466.64	33109.4	5772.61	8014.42	20861	28730.9	25545.8	2824.17	827.955	21251.3	4228.68	15939.4	13901.5	1.1466	0.776849	0.177445
M695T140	695.46657	139.8965	nodiff									59812.8	75204.7	68523.4	62624.9	68519.5	40488.4	51515.9	56128.8	74984.2	63319.6	51358.4	68294.4	62528.9	60933.6	1.02618	0.804876	0.538739
M277T286	277.07295	286.1750	nodiff									103740	87011.2	81708.2	90622.4	148357	94643.9	89879.5	77960.4	111682	106225	87745.2	78963.8	101014	92076.1	1.09707	0.453818	0.314039
M302T41_2	302.28345	41.2205	nodiff									23395.3	24480.3	46112.9	3873.8	14270.2	17506.5	32867.5	20049.1	33676.3	27689.3	30139.1	32684.7	21606.5	29517.7	0.731985	0.226222	0.633574
M845T354_2	844.96435	353.9670	diff									95813.2	89412.2	74696.5	99337.9	94077.3	91349.4	80613.2	97152.8	7346.75	3318.57	84400.7	29790.1	90781.1	50437	1.79989	0.0432204	1.22584
M793T155	792.53498	154.5710	nodiff									127077	116213	113927	121240	102486	25727.6	124977	119015	79046.6	72461.3	115776	84005.5	101112	99213.7	1.01913	0.918611	0.27789
M477T178	477.31753	178.2720	nodiff									11209.2	7340.21	14942.4	15325.3	46317.5	7456.7	38983.5	46820.7	18726.8	8350.55	26285.9	27955	17098.5	27853.7	0.613869	0.220754	0.678731
M213T106	213.14886	105.5715	nodiff									57702	35379.4	25155.5	55266.5	23989.5	222106	29828.1	58002.6	27655.5	20638.7	38874.9	28051.4	69933.2	33841.9	2.06647	0.27808	0.829601
M491T192	491.23712	191.6890	nodiff									43930.9	5976.5	7795.02	33686.5	4702.46	6055.94	10626.4	15367.7	10515.7	14119.9	7942.25	13017	17024.6	11931.5	1.42686	0.490431	0.243691
M158T150	158.06037	150.2305	nodiff									210267	121140	211402	185058	88769.2	160819	163723	188394	111024	104432	229084	169070	162909	160955	1.01215	0.945678	0.419907
M255T133	255.15922	133.3590	nodiff									29284.4	240339	277040	17114.6	244748	12299.9	274324	303974	12382.9	7046.01	18558.7	266363	136804	147108	0.929958	0.90026	0.831431
M255T144	255.23210	143.5725	nodiff									136755	122542	125208	128067	102934	182278	139477	119578	127765	130893	125129	235681	132964	146420	0.908097	0.537414	0.863983
M270T34	269.99167	34.0405	nodiff									15518.3	32793.6	17164.9	20676.9	79722.8	15229.4	11750	16051	14029.1	2400.28	10888.3	9916.13	30184.3	10839.1	2.78476	0.0935827	0.753669
M116T301	116.07114	300.6260	diff									145777	130315	121969	122794	197707	120459	116560	93286	46086.3	54348	143559	88124.2	139837	90327.4	1.54811	0.0285216	1.25284
M727T86	726.58882	85.7770	diff									58006.7	78924.2	55708.5	66956	56445.8	117111	6113.53	5206.55	4017.69	2097.59	6851.48	7318.71	72192.1	5267.59	13.705	4.24567e-05	1.62775
M848T174	847.64498	173.6835	nodiff									59153	50511	65023.3	67679.2	63780.7	77505.5	113907	123374	24583	18708.2	115562	85878.8	63942.1	80335.5	0.795938	0.423145	0.799219
M317T168	316.98974	168.3510	nodiff									162469	238241	171105	219842	124156	203086	286100	225703	296991	121733	235492	179966	186483	224331	0.831287	0.262523	1.06431
M727T128	726.51170	127.8915	diff									168210	179276	194963	180520	218722	129296	112902	145419	8717.4	5105.44	187350	34289.9	178498	82297.2	2.16894	0.0170947	1.84398
M267T187	267.06142	187.1570	nodiff									12607.7	7160.54	4708.16	23820.9	30567.7	16036.9	8227.22	5404.23	5662.62	3031.57	7061.9	3509.58	15817	5482.86	2.8848	0.0311435	0.57276
M465T165_2	465.35701	165.0750	diff									63096.5	20038	75671.2	51928.3	18607.8	28385.7	162023	267538	94640.9	53525.7	138750	112500	42954.6	138163	0.310898	0.0130004	1.90255
M472T35	472.34446	34.7345	nodiff									21816.5	14322.8	19161.3	27756.9	20343.6	6528.75	13673.8	15177.2	3814.22	5569.95	11094	8403.15	18321.6	9622.05	1.90413	0.0312424	0.453822
M695T107	695.46556	107.4620	diff									195169	237965	132036	128404	242371	103748	112838	132294	26004.7	18742.5	186223	16487.7	173282	82098.3	2.11067	0.0381188	1.7439
M252T50	252.42626	50.4590	diff									13434.4	12611.9	9115.52	6419.01	3624.95	13620.4	46712.4	67422.4	55079.8	30206.2	26335	57327.4	9804.36	47180.5	0.207805	0.00026054	1.24982
M789T107	788.52377	107.1810	nodiff									46332.8	35280	94213.2	47966.3	35148.6	52665.5	109876	68748.1	2000.54	2443.24	73822.4	4290.15	51934.4	43530	1.19307	0.698195	0.503034
M337T299	337.14911	298.5380	nodiff									6588.01	8809.11	9806.7	8266.54	5691.9	1866.91	15862.6	20786	8039.45	3581.45	77924.4	11904.6	6838.19	23016.4	0.297101	0.183081	0.68316
M410T36	410.23572	36.3020	nodiff									16921.9	20277	25340.5	22727	24722.3	16864.5	12190.1	19464.8	9475.74	4513.17	10504.5	9337.44	21142.2	10914.3	1.93711	0.00228112	0.57419
M869T111	868.53724	110.5610	nodiff									139658	153719	105280	202243	170422	124198	162925	110269	77005.9	57932.5	117367	143134	149253	111439	1.33933	0.106898	0.888172
M581T355	580.90469	354.6530	nodiff									144252	159785	157707	159277	159708	160609	154351	154517	52468.3	26148.7	147168	113624	156890	108046	1.45206	0.0595746	1.25304
M230T407	230.03872	407.3260	nodiff									121746	88073.4	124614	124754	90070.2	101877	139088	143032	97539.3	92838.5	117062	127327	108523	119481	0.908281	0.346893	0.810381
M314T28	313.94042	28.2910	nodiff									9140.62	15056.9	1828.94	7993.42	49637.6	2694.52	1385.45	2199.66	1065.68	1030.77	2011.47	607.831	14392	1383.48	10.4028	0.105949	0.622375
M544T187	544.31604	187.4260	nodiff									28195.7	31601	39106.2	49665.3	29949.4	35332.2	32439.1	41439.6	6467.84	7127.45	39123.3	10985.8	35641.7	22930.5	1.55433	0.119416	0.596162
M600T32	600.46599	31.9130	nodiff									11137.5	11125.8	25104.4	39726.4	6202.47	29740.6	9649.16	18468.5	6201.36	2106.99	6069.11	8179.46	20506.2	8445.76	2.42799	0.0642453	0.551486
M123T24	123.00803	24.1390	nodiff									2663.58	8583.78	5015.92	1577.55	17964.6	2359.94	3202.28	4867.53	5786.97	3526.86	3621.01	3140.73	6360.89	4024.23	1.58065	0.386344	0.185042
M187T54	187.03976	54.0075	nodiff									13779.7	3799.53	9425.64	2951.45	3593.14	9072.87	4581.2	3376.88	2958.48	3300.15	5292.3	3187.28	7103.72	3782.72	1.87794	0.096982	0.231793
M581T63	581.45549	62.8445	diff									16983.1	7005.3	18672.4	13755.4	7824.86	6224.41	32179.3	47652.2	63568.7	40001.4	36318.7	85239.9	11744.2	50826.7	0.231064	0.00100312	1.30656
M519T190	519.27168	189.8560	nodiff									15877.8	15200.9	21635.9	18877.8	9713.56	8659.38	28665.1	19985.8	30078.4	29074.4	27825.9	28119.5	14994.2	27291.5	0.54941	0.000701403	0.776519
M154T464	154.06181	464.1390	nodiff									11594.9	13420.3	82723.4	84762.7	69942	358779	209846	47404.2	25924.6	32506	25697.4	38799.8	103537	63363.1	1.63403	0.521531	0.816058
M154T409	154.06164	409.4440	diff									162699	119461	123739	154413	158765	170565	61374.5	52341.5	18935	21559.6	106803	37945.6	148274	49826.5	2.9758	0.00010153	1.9286
M349T29	349.20409	29.2020	nodiff									16093.1	21315.7	18125	23509.6	11956.2	11710.7	13137.4	13605.8	13570	6174.86	27744.6	22555.5	17118.4	16131.3	1.06119	0.795768	0.0467833
M901T182	900.56469	181.7460	nodiff									13373	13205.6	39216.5	17508.8	7974.76	17862.1	46419.7	46584.1	11295	4690.65	47077.3	28553.9	18190.1	30770.1	0.591162	0.191601	0.590005
M663T354	662.90861	354.2025	diff									134811	136540	127560	134123	136212	135051	129234	131344	27822.7	10904.4	124098	76910	134050	83385.6	1.60759	0.0438985	1.33036
M117T659	116.92780	658.6355	nodiff									188909	70445.8	94659.9	80127.9	218298	133743	91364.2	326996	111229	112387	3551.89	2293.15	131030	107970	1.21358	0.680823	0.305703
M392T171	392.13671	170.6160	nodiff									4491.55	12550.6	75895.9	2517.49	3316.63	18388.7	1802.41	5868.56	2973.28	2517.39	5294.94	3888.85	19526.8	3724.24	5.24317	0.202051	0.486739
M895T180	894.57205	180.0490	nodiff									37829.3	16361.4	42202.2	37963.2	26136.5	32108.6	51367	39109.7	12508.5	3345.96	41950.5	30575.1	32100.2	29809.5	1.07685	0.792272	0.308298
M184T118	184.06084	118.3805	nodiff									15319.5	22966.9	103844	22438.5	16460.7	15048.5	36851.8	33375.2	19735.8	26674.8	38815.8	33932.5	32679.6	31564.3	1.03533	0.940602	0.299622
M798T140	797.58680	139.8890	nodiff									57933.5	75226.1	79023.3	50923.3	54297.4	69585.6	47021.7	43499.3	31616	21780.9	54727.6	37438.4	64498.2	39347.3	1.6392	0.00394631	0.833364
M783T143	782.59832	142.8795	nodiff									50096.5	77485	57225	55562	60580.8	59763.1	79387.3	62681.3	32186.1	30509	78549.5	57003.3	60118.7	56719.4	1.05993	0.729761	0.341096
M897T105	896.53025	105.2095	diff									132809	163706	108252	165953	201228	290481	80316.3	82325.4	56365.1	65703.8	70076.6	93328.5	177071	74685.9	2.37088	0.00326067	1.84323
M607T47	607.46951	46.7960	nodiff									18062.9	16035.2	22512.8	13544.9	6750.39	37129.8	43333.4	28745.8	9644.98	21227.4	11872.7	23004.8	19006	22971.5	0.827372	0.557665	0.21591
M95T583	94.98033	582.8510	nodiff									220974	179868	630275	265054	150092	288372	298563	313904	179572	298832	476442	429305	289106	332770	0.868787	0.612265	1.35335
M281T107_1	281.17500	106.9590	nodiff									15419.1	8030.88	7192.71	16839	19217.5	5889.61	192305	6589.47	7049.09	2075.81	5041.21	3358.73	12098.1	36069.8	0.335409	0.462053	0.52682
M794T107	793.55577	106.6050	diff									83688.7	117927	131727	60331.6	101230	232891	79550.1	88670.5	19102.2	28159.4	97850.1	33661.5	121299	57832.3	2.09743	0.0490525	1.30035
M418T34	418.29737	34.2950	nodiff									28538.2	14442.8	22896.4	32386.1	18928	14225.3	8816.61	12051	6796.12	2479.67	5884.83	3985.76	21902.8	6669	3.28427	0.00106966	0.687781
M481T29	481.29883	28.5830	nodiff									39498.8	39885	38007.4	47150.3	26658.5	54804.1	12532.3	20421.8	14841.9	6898.72	16329.2	15016.8	41000.7	14340.1	2.85916	9.57081e-05	0.984419
M547T297	547.16809	296.6995	nodiff									73298.5	86891.3	125879	86326.5	26418.8	93631.2	132118	114962	113885	75778.5	116732	122451	82074.3	112654	0.728549	0.0753549	1.18479
M582T41	582.45753	40.7120	nodiff									16197.9	15281	20688.1	16254	9993.19	7498.47	22758.4	21137.6	19555.3	10421.9	14070	19374.2	14318.8	17886.2	0.800547	0.220544	0.391998
M909T177	908.56605	176.7810	nodiff									9350.48	8033.76	25291.1	9685.2	6865.33	10013	56776.3	51448.4	20535.9	6117.59	55726	39907.4	11539.8	38418.6	0.30037	0.0133048	0.997167
M237T34_1	236.98918	33.8175	nodiff									14243.7	6926.35	9998.72	11153.9	14688.6	33976.2	10642.3	13846.5	12664.2	12919	8854.12	10286.9	15164.6	11535.5	1.3146	0.387344	0.219259
M435T108_2	435.31008	107.9710	diff									9620.39	5907.03	13134	16915.6	3803.97	11432.2	88015.4	28156.1	76074.7	42911.4	25583.8	100836	10135.5	60262.9	0.168188	0.00368727	1.36205
M263T118	263.04337	118.2400	nodiff									15382.1	22726.7	78882.2	19498.1	18301.9	11889.4	37548.1	31752.9	47813.3	62179.2	40755.5	79964.7	27780.1	50002.3	0.555576	0.110311	1.02755
M128T380	128.03461	379.9000	nodiff									156372	131249	217923	146935	121469	84974.3	160823	176448	107884	80518.3	76097.5	90551.3	143154	115387	1.24064	0.295744	0.416709
M183T131	183.00575	131.2000	nodiff									60832.6	66529.9	69664.6	76462.6	51104	62740.1	77797.4	69016.9	209409	196690	64325.9	96913	64555.6	119025	0.542369	0.0733898	1.66817
M303T107	303.23187	106.9590	nodiff									115816	145548	149230	109568	241958	198014	289566	127004	15510.9	10784.5	109127	18276.3	160023	95044.7	1.68366	0.212327	1.5432
M865T65	864.57717	64.6965	nodiff									51552.1	31275.6	68775.6	47093.5	47190.5	139071	35088.9	60116.2	31985.9	29835.4	12496.7	195.031	64159.7	28286.3	2.26822	0.0723077	0.923981
M282T31	281.99152	31.4580	nodiff									13537.1	30100.4	6846.86	6683.58	10159.5	9882.34	14487.6	21634.4	9226.31	9347.81	5341.97	5341.28	12868.3	10896.6	1.18095	0.664278	0.0921899
M743T176	743.48486	176.1600	nodiff									17256.2	3149.91	15930.8	3520.66	14105.1	2314.18	11603.9	3101.18	3456.44	2257.88	3332.55	3068.05	9379.47	4470	2.09832	0.159068	0.240889
M758T144_1	757.50409	143.5130	nodiff									53960.6	75158.7	49847.1	56029.1	47931.9	65238.3	44263.5	43219	21610.1	29415.6	40288.7	31130.3	58027.6	34987.9	1.65851	0.0021024	0.847468
M761T137	760.52491	137.4210	nodiff									59258	53680.4	70905.7	57231.1	62405.6	60972.9	50316.9	40257.9	22419.3	45979.2	45938.2	35310.3	60742.3	40037	1.51715	0.00143937	0.700584
M153T238	153.02977	237.9080	nodiff									43842.4	69650.3	34272.2	43428.8	87507.8	35600.5	41055.9	40671.2	18585.4	13019.7	43725.8	22020	52383.6	29846.3	1.75511	0.0540894	0.883994
M494T201	494.28743	200.5750	nodiff									3255.3	5604.36	13251.1	4067.86	6450.69	3280.6	1440.21	11413.5	2162.43	1536.24	12153.8	1578.54	5984.98	5047.45	1.18574	0.729398	0.117887
M543T288	543.00182	287.8120	nodiff									71393.5	71166.8	63200.1	52855.3	95253.5	64330.8	63022.2	69196.1	68051.7	30440	82155.5	67479.9	69700	63390.9	1.09953	0.507111	0.321098
M873T142	872.59811	141.6390	nodiff									67081.9	47640.7	48186.3	62073.7	28245.2	61772.1	73339.5	94902	43674.9	22134.5	129507	67962.8	52500	71920.1	0.729977	0.266233	0.75246
M873T144_1	872.53733	143.6275	nodiff									35642.9	38055.4	71010.9	34875.4	27454.1	21043.6	104611	15384.1	58961.8	31250.1	118461	74841.3	38013.7	67251.6	0.565246	0.133834	0.939863
M745T354	744.91202	353.9670	diff									110224	108118	103955	115781	113617	109564	101481	111048	16984.7	7625.65	100692	53600	110210	65238.4	1.68934	0.0373531	1.27297
M305T187	305.05418	186.8995	nodiff									28750	41892.8	29778.8	22887.7	26800.8	30162	25900.8	21614	4100.73	3481.75	17631.1	8003.45	30045.4	13455.3	2.23297	0.00537097	0.753192
M337T627	336.89756	627.4110	nodiff									61866	97890.2	55605.8	64311	104645	72830.4	61485.2	68589.1	78342.7	77836.3	56205.3	57198.1	76191.4	66609.5	1.14385	0.323371	0.267863
M95T18	94.98030	18.2250	nodiff									186251	141769	198613	178407	123011	77239.1	162920	170780	192414	197367	186716	166519	150882	179453	0.840788	0.177345	1.39822
M95T44	94.98017	43.7100	nodiff									79513.4	105772	73483.7	87418.7	95040	30364	91297.6	60281.4	93976.8	99098.3	62531.3	71576.3	78598.5	79793.6	0.985023	0.927292	0.561199
M715T127	714.50872	127.4630	diff									135537	94221.4	137110	153102	102601	78257.4	95224.9	87015.8	4123.46	2256.3	30393.5	18158.1	116805	39528.7	2.95493	0.00385647	1.59122
M283T171_2	283.11147	171.3110	nodiff									36129.6	24756.7	5235.18	5300.07	3145.74	3831.13	18738.1	5207.36	15256.4	2596.85	24217.8	8380.52	13066.4	12399.5	1.05378	0.922078	0.0493565
M201T247	201.02524	246.9585	nodiff									159803	186526	177110	165135	156617	149826	170249	139869	141720	155720	164855	126568	165836	149830	1.10683	0.0985583	0.604932
M185T56	184.82207	56.2650	nodiff									87570.9	94814.1	43853.1	85577.2	79619.8	91617	55372.5	46977.4	67684.6	61499.8	83192.9	66037.3	80508.6	63460.8	1.26864	0.0915408	0.454408
M234T31	233.98456	30.7235	nodiff									33382.1	25219.1	10948.2	27463	2749.56	21674.8	4258.94	8420.49	38632.5	27389.7	10126	7222.32	20239.4	16008.3	1.26431	0.574309	0.539482
M271T238	270.97481	237.5245	nodiff									226264	229912	239706	101320	234649	232353	211979	110743	136764	136319	118815	217759	210701	155397	1.35589	0.0875601	0.824007
M462T176	462.32894	175.5620	nodiff									10592.8	4140.36	5935.64	3655.48	1438.54	3609.28	11244.2	13525.6	7332.14	8232.83	11254.1	10173.3	4895.35	10293.7	0.475567	0.00649995	0.478152
M294T195	294.04879	195.0905	nodiff									59992.6	73105.4	126170	40813.2	59942.1	53648.1	55491.2	55044.8	42242.1	25408.7	63981.3	40862.5	68945.3	47171.8	1.46158	0.136648	0.472114
M572T194	572.24197	193.8950	nodiff									17260.6	4509.83	11869.1	41140.3	21158.4	45254.1	879.49	5269.82	337.254	610.335	1240.93	1034.25	23532	1562.01	15.0652	0.00821685	0.85901
M719T139	719.46664	138.6410	nodiff									38408.8	36529.9	48081.7	37288.4	37043.1	25298.8	37903.7	38539.8	70602.9	44170.6	47646.8	42203.8	37108.4	46844.6	0.79216	0.123392	0.760126
M179T57	179.10726	56.6030	nodiff									34734.5	24346.7	9265.33	22571.4	44264.6	40778.2	23772.5	24653.5	28013.8	25931.7	35689.2	21365.3	29326.8	26571	1.10371	0.640179	0.0610185
M279T189	279.23193	188.9510	nodiff									87458.6	51793.5	19138.1	91639.5	62101.6	61310	70963.1	53371.1	46449	34912.5	65121.1	50622.2	62240.2	53573.2	1.16178	0.48627	0.241051
M492T189	492.30782	189.2620	nodiff									12900.7	29809.9	13303	13828	36095.9	12445.7	25448	24967	45641	41267.2	25335.6	42996.9	19730.5	34276	0.575638	0.0333441	0.733314
M423T107_2	423.34638	106.6050	diff									46386	23576.3	49514.7	33053.1	9842.37	16572.9	90265.8	144882	107964	59701.3	80120.5	99672.2	29824.2	97101	0.307147	0.000536025	1.74708
M242T128	242.17538	127.9550	nodiff									20001.2	28824.8	46073.3	26307.3	31884.8	24043.7	61589.1	64993.1	35857.3	16962.8	54335.8	31068.6	29522.5	44134.5	0.668922	0.12115	0.7402
M305T171	305.06615	170.9350	nodiff									29778.3	60957.7	137653	36167.3	17062.6	33529.2	52836.7	42680.1	53631.2	14787.8	52151.7	25214.4	52524.6	40217	1.30603	0.536309	0.300881
M565T356	564.87315	356.1830	diff									165554	172870	174235	157739	162551	171078	161157	93575.2	79530	46433.7	158944	141274	167338	113486	1.47453	0.0199044	1.15054
M647T354	646.87722	354.3630	nodiff									140557	137167	134553	144958	143017	136554	139406	137837	40004.5	18678.6	129677	91592.7	139468	92866.1	1.50182	0.0558227	1.24903
M799T39	798.53807	38.7670	nodiff									8000.36	9909.84	21547.2	8758.34	4031.5	7251.33	8748.7	9681.2	1847.92	1344.51	3745.94	4463.44	9916.43	4971.95	1.99447	0.113067	0.290021
M261T237	261.04548	237.0460	nodiff									12055.4	19230.1	13012.6	14183.3	106194	19328.4	16605.6	8619.04	16699.4	9325.64	13257.2	21019.1	30667.3	14254.3	2.15143	0.308104	0.630901
M582T109	581.51136	108.8040	diff									17846.6	6108.55	16047.9	13767.3	7859.95	7786.38	62299.9	120307	76346.9	31970.1	74974.2	71278.6	11569.4	72862.8	0.158784	0.00040417	1.63148
M325T40	325.27357	39.8690	nodiff									30296.9	22852.9	30214.1	33051.1	8741.08	28382.8	16623	22394	29599.5	24067.3	21328	27052.5	25589.8	23510.7	1.08843	0.622216	0.492477
M559T288	558.97932	287.8485	nodiff									73779.9	66940	63555.3	54463.9	104872	66347.6	65357.3	79448.2	70442.9	35276.8	82134.7	63700.1	71659.9	66060	1.08477	0.583452	0.371495
M770T109	769.55709	109.4450	diff									183161	222210	209624	170870	181901	475515	201126	176153	10441.9	9050.51	183247	32383.2	240547	102067	2.35675	0.0467629	2.06104
M234T29_1	233.97083	28.8090	nodiff									22365.4	14101	4206.02	17992.6	41990.7	24990.1	13970.6	35191.7	23847.4	21614.5	6293.27	11920.5	20941	18806.3	1.11351	0.754778	0.0528566
M123T108	122.97480	108.1155	nodiff									64470.5	153917	56714.6	66238.2	271588	45918.6	57751.8	72749.6	75438.3	48093.6	58815	60812.8	109808	62276.9	1.76322	0.219476	0.978483
M333T423	333.05836	423.0900	nodiff									20943.7	18443.1	20359	18658.4	22574	16759.6	34944.3	45585.5	21051.7	16065.4	43487.4	21863.4	19622.9	30499.6	0.643384	0.0627527	0.693235
M181T56	180.82615	56.2650	nodiff									77802.6	93944.8	43274.4	82850.5	79593.8	93387.7	57030.1	52109	68494.1	58860.4	78185.8	67827.2	78475.6	63751.1	1.23097	0.114349	0.401494
M152T161	152.03458	161.3975	nodiff									85696.4	159599	139134	119624	76118.1	80751	130380	103969	162121	89473.7	109493	88450.6	110154	113981	0.96642	0.837796	0.729074
M352T31	352.07571	30.7810	nodiff									2037.64	11161.1	14718.4	1545.27	4915.86	1686.08	8411.81	3541.59	6173.95	4756.49	5815.64	1575.79	6010.72	5045.88	1.19121	0.706182	0.0818773
M719T360_1	718.76146	359.9140	nodiff									148319	166935	159340	151549	165875	160181	157920	114051	181791	98071.8	112886	124508	158700	131538	1.2065	0.0687988	0.571202
M893T354_1	892.88783	354.0395	diff									90452.5	84552.1	76060.8	95880.8	93965	88672.4	85671.1	93209.2	7126.7	3081.62	76643.3	31056.4	88263.9	49464.7	1.78438	0.0439194	1.20925
M819T471_2	819.35569	471.3255	nodiff									16104.4	25378.9	20754.7	13751.2	35945.8	13294.4	13924.1	15325.2	5944.31	5235.86	18100.3	12177.5	20871.6	11784.5	1.7711	0.0525804	0.529441
M155T394	154.94675	393.8610	nodiff									227201	253731	217132	228391	208825	213409	234570	211276	266428	314009	218476	268291	224781	252175	0.891371	0.138864	1.47906
M507T62	507.43955	62.1820	diff									7443.14	3772.4	9864.96	7291.31	2331.98	2874.19	50438.2	64504.2	67161.3	34844.8	52885.4	61483.2	5596.33	55219.5	0.101347	1.78168e-06	1.50124
M110T162	110.02393	161.9750	nodiff									47111.1	50017.9	102406	34408.1	43892.6	34945.1	49627.8	61358.3	36637.5	21629.7	57021.4	47639.9	52130.1	45652.4	1.14189	0.599831	0.0173597
M501T143	501.29882	143.4355	diff									40524.6	17072.6	38979.8	37602.1	9625.8	29788	48296.3	74551.5	102795	45558.8	77696.9	51638.4	28932.1	66756.1	0.433401	0.00489536	1.29501
M317T418	316.86820	418.2695	nodiff									13158.3	12834	13451.7	12230.4	12198.6	16106.7	12556.7	11936.9	15527.3	15685.3	15903	9124.9	13329.9	13455.7	0.990656	0.922478	0.253831
M175T211	174.99174	211.1230	nodiff									39431.4	44187	35907	40853	65722.6	38857.1	69433.9	35326.5	46169.3	48960	28457.2	43825.6	44159.7	45362.1	0.973493	0.871559	0.233129
M820T174	819.61429	173.6930	diff									19718.8	10980.5	9351.85	16809.8	13348.5	15743.4	76786.8	92313.1	24719.1	14376.2	87848.7	65327.6	14325.5	60228.6	0.237852	0.0069912	1.32957
M373T34	373.04396	34.4525	nodiff									17286.9	18143.1	15540.5	18182.2	21735.7	23207.1	18458.9	18791.4	13702.4	14031.1	13659.1	15431.7	19015.9	15679.1	1.21282	0.0533652	0.20427
M671T110	671.46544	109.7900	diff									189454	105506	144065	189428	155588	81607.6	110959	115797	7460.49	8469.95	68481.8	15380.6	144275	54424.7	2.65091	0.00842064	1.69565
M581T349	580.84770	348.7065	nodiff									1278.73	1725.05	3357.37	931.143	81377.2	1322.23	1850.41	2135.35	2275.14	1368.11	3055.66	2866.03	14998.6	2258.45	6.64111	0.3601	0.602867
M83T33	82.95347	33.1830	nodiff									15502.4	12808.3	7807.79	9553.47	22493.5	16048.4	10400.5	9443.4	11097	7399.79	5023.92	11234.4	14035.6	9099.85	1.5424	0.0635672	0.288878
M161T295	161.04499	295.4700	nodiff									45959.3	50771.1	84181.3	46465.9	20157.5	54436.4	87443.6	84435.3	51241.9	28585.9	87438.7	70357.8	50328.6	68250.5	0.737409	0.194102	0.74613
M461T34	461.36196	33.8330	nodiff									21453.3	20121.3	22168	24068.6	18268.2	26745	16045.4	17722.5	10242.2	5770.93	8967.78	10244.4	22137.4	11498.9	1.92518	0.000703792	0.606219
M313T49	313.23728	49.3765	nodiff									23904.3	15095.7	14935.8	17293	6674.83	29410.8	28197.3	29778.9	19200.8	41416.9	48600.2	22271.2	17885.7	31577.5	0.566406	0.0354641	0.65536
M523T188	523.30293	187.7410	nodiff									10025.7	8769.29	10763.9	8704.61	5021.86	9512.9	9081.32	7576.18	30602.9	19274	10650.9	27939.1	8799.71	17520.7	0.502246	0.0626774	0.65887
M523T182	523.24876	182.2120	nodiff									16217.8	17432.3	9744.44	16427.9	16008.8	8601.46	26237.5	11655.3	42350	29969.2	26528.6	46178.3	14072.1	30486.5	0.461586	0.0115465	0.828056
M842T38	841.50972	38.4660	nodiff									6958.98	5081.42	7256.49	2586.35	9591.1	5390.06	2072.94	4715.54	4104.29	2040.26	1692.2	2467.83	6144.07	2848.84	2.15669	0.0131019	0.26714
M299T33	299.09657	32.5740	nodiff									9625.96	6071.85	14755.9	7910.2	13265.7	5168.35	8413.2	8856.11	6194.15	6661.73	5969.36	11799.6	9466.32	7982.36	1.1859	0.433854	0.0356327
M310T29	310.19442	28.9205	nodiff									6989.24	9433.8	6252.65	12318.3	13542	19829.7	7169.59	16059.3	5066.34	6871.13	29246.8	8318.85	11394.3	12122	0.939969	0.868602	0.207248
M145T168	144.86880	167.7430	nodiff									80810.8	73563.5	28935.7	60478.6	51047.9	204961	39847.2	42443.7	85514.5	96370.9	36448.5	73283.4	83299.6	62318	1.33669	0.464234	0.773309
M416T37	416.32216	36.9140	nodiff									21820.2	8622.09	19810.4	27411.1	3527.86	9213.15	9941.15	9972.35	6560.87	3858.02	6008.76	6885.31	15067.5	7204.41	2.09142	0.0718133	0.398989
M416T34_1	416.28244	34.4650	nodiff									17717.6	10443.2	12191.4	14736.9	12465.5	21689.1	6831.67	7656.16	4878.06	3881.87	5452.48	5302.02	14873.9	5667.04	2.62464	0.00044161	0.564033
M803T354_2	802.95403	354.0395	diff									93389.7	87724	82935.1	96158	97087.7	92122.3	85803.2	94418.3	8648.88	3526.95	83368.9	33475.7	91569.5	51540.3	1.77666	0.0400511	1.22178
M440T186	440.17742	186.1165	nodiff									29456.8	29990.2	47456.4	32010	49922.9	51566.2	22243.8	23945.6	22590.3	34145.4	23554.8	34525.5	40067.1	26834.2	1.49313	0.0232664	0.488618
M735T88	734.53419	88.1220	diff									54242.1	90162.1	61235.8	62044.1	61508.7	135561	14064.4	15751.2	13901.4	6017.9	22060	23565.1	77459	15893.3	4.87369	0.000776603	1.49024
M272T26	271.98343	26.1030	nodiff									4695.24	5286.67	8593.73	3538.9	15685.2	14899.4	5893.91	5066.36	9800.07	7308.09	6541.97	10547.7	8783.2	7526.36	1.16699	0.604327	0.0508353
M472T56	472.24597	55.9850	nodiff									66420	28013.7	50301.3	56415	19916.7	25759.5	69217.3	60354.3	4419.98	2944.96	38979.1	26513.4	41137.7	33738.2	1.21932	0.602195	0.351538
M796T64	795.57424	64.1815	diff									89510.6	103795	140927	97472.4	128423	100817	56219	74492.5	4504.52	2529.9	34726	4789.92	110158	29543.6	3.72864	0.000307992	1.74366
M147T168	146.86586	168.1220	nodiff									57054.3	70554.2	47154.3	69641.3	78534.1	192865	52733.6	45912.3	91163	103860	44036.6	54502	85967.2	65367.9	1.31513	0.414801	0.711891
M361T34	361.11293	33.8410	nodiff									5146.79	4239.15	6083.89	4360.78	3065.87	1832.13	20927	22132	12468	12262.5	16926.9	12606.4	4121.43	16220.5	0.254088	9.26975e-05	0.721707
M119T295	119.03426	295.2945	nodiff									68243.4	69471.6	114482	66581	40950.2	77843.6	118548	118654	68971.3	41435.8	112766	87291.8	72928.7	91277.8	0.798975	0.281673	0.757691
M253T34	252.96427	33.8260	nodiff									3785.43	3496	3194.14	1999.11	22711.2	10362.6	1928.89	2408.51	2003.6	1487.68	4386.16	1497.37	7591.41	2285.37	3.32175	0.137502	0.391016
M562T186	562.33643	186.2080	nodiff									42230.3	46272.4	59471	40062.3	41478.2	44284.3	45203.9	47906.4	10147.2	8613.34	47592.8	12501.6	45633.1	28660.9	1.59217	0.0791373	0.685266
M778T39	777.50407	38.8120	nodiff									10410	6841.82	19795.8	11178	4773.33	12321.8	22596.8	23931.7	5513.3	12170.2	11798.8	13782.5	10886.8	14965.6	0.727457	0.280063	0.298218
M856T187_1	855.50613	187.1540	nodiff									47248.6	33064.5	56965.8	33051.9	25117.6	24405.9	47209.7	44846.8	16393.1	11788.2	78715.1	25378.4	36642.4	37388.5	0.980043	0.949333	0.316596
M244T30	243.99183	29.5050	nodiff									30850.2	49182.8	11537.2	26136.4	61568.9	15670.3	13744	15328.2	14891.8	12105.4	13992.1	11265.3	32491	13554.5	2.39706	0.0387171	0.698132
M499T143	499.24556	143.4950	nodiff									36128.8	26652.7	19362.9	5405.93	12072.9	4120.36	21418.6	88610.1	11671	19595.4	33320.4	12292	17290.6	31151.3	0.555053	0.310869	0.562635
M509T83	509.45587	82.9130	diff									21084.7	8026.55	37402.7	20333.2	8722.64	14935.4	75732.2	113387	80139	47175	87663	184098	18417.5	98032.5	0.187872	0.00242044	1.75293
M509T63	509.45593	62.5430	diff									6437.71	4429.77	8490.61	6216.17	3030.23	4979.32	40467.8	59675.4	61563.4	34323.1	52450	58553.3	5597.3	51172.2	0.109382	1.96472e-06	1.44191
M683T36	682.58922	36.3030	nodiff									7266.73	16293.6	15030.5	6949.52	4682.8	33986.8	2358.93	3156.06	5564.82	5751.77	6085.68	1770.08	14035	4114.56	3.41106	0.0517694	0.519128
M155T348	154.94656	347.8025	nodiff									94168.8	87444.8	89557.8	100915	82632.8	103197	94282.8	86450.8	101890	107244	93814.5	99484.1	92986	97194.4	0.956702	0.361787	0.795251
M547T360	546.82328	360.3760	nodiff									111841	174743	172551	165028	162570	177331	171780	158562	193069	142185	159962	121073	160677	157772	1.01842	0.842127	0.6185
M366T47	366.22575	47.4120	nodiff									13682.6	15689.4	7921.54	17970.2	4746.08	78610.9	18055.7	24894.4	15077.2	17179.7	14685.6	20947.5	23103.5	18473.3	1.25064	0.692997	0.274902
M315T29_2	315.13593	29.0250	nodiff									19339.8	13962.9	12882.2	21259.6	21343.1	21198.2	22818	22000.3	17425.1	10109.3	19318.2	13363.7	18331	17505.8	1.04714	0.755401	0.128132
M496T171_2	496.24598	170.6370	nodiff									35306.5	21167.3	9348.67	6567.44	25009.8	8473.92	22977.4	28228.3	34413.7	34696.7	21871	16327.6	17645.6	26419.1	0.66791	0.145046	0.557012
M821T354_2	821.00341	354.0395	diff									70787.7	65209.3	60877.1	78953.5	73312.9	65615.5	57323.6	70859.3	3813.2	975.157	60213.4	17621	69126	35134.3	1.96748	0.0257697	1.12733
M385T47	385.18927	47.4645	nodiff									6604.33	12536.2	22483.8	5708.87	10219.7	16814.8	10775.6	9438.64	11429.5	9160.83	8513.54	6767.03	12394.6	9347.52	1.32598	0.284788	0.218962
M213T107_2	213.18531	106.6860	nodiff									9094.58	8975.69	9608.21	11138.6	10728.7	9843.4	17958.3	28406.4	6372.17	10381.3	7602.43	8600.42	9898.21	13220.2	0.74872	0.363193	0.247868
M61T575	60.99265	575.4090	nodiff									360597	375078	338418	189423	338044	332762	353765	391493	195751	379592	373425	354799	322387	341471	0.944113	0.647136	0.887934
M253T98	253.14387	98.3500	nodiff									32811.1	73840.1	57305	90103	46448.2	48308.4	101325	125023	46115.4	43265.2	73481.1	56276.7	58136	74247.7	0.783	0.333141	0.586595
M401T58	401.23037	57.7200	nodiff									3885.49	2631.95	1539.72	2707.05	3994.8	45310.3	1974.38	2234.75	1402.12	4111.96	2606.53	1637.47	10011.5	2327.87	4.30073	0.303312	0.390218
M213T199	213.01642	198.9780	nodiff									91186.3	118561	109718	87573.8	52599.2	84618.2	140486	117546	87300.4	78425.9	130546	128749	90709.4	113842	0.7968	0.127737	0.957968
M240T32	239.99636	32.0480	diff									40781.7	36066.7	23617	54905.1	43166.6	18491	2510.98	2235.39	7451.11	7571.57	3541.35	6806.55	36171.3	5019.49	7.20617	0.000222818	1.03288
M223T97	223.02745	96.6455	nodiff									88692	91383.6	87211.6	59847	112207	44811.4	64232.5	414111	57363.4	51352.7	103321	53296.8	80692.1	123946	0.651026	0.483136	1.00998
M95T65	94.97998	65.3150	diff									108701	111347	88461.9	80142.4	125681	32700.2	104775	102120	161420	130243	128969	138397	91172.1	127654	0.714212	0.048243	1.28729
M478T181	478.32602	181.0340	nodiff									10397.6	6504.33	1652.5	8658.17	7088.85	8939.36	8663.05	5753.48	12089.2	655.696	3911.99	3157.12	7206.8	5705.09	1.26322	0.489396	0.0851389
M220T186	220.06382	186.1750	nodiff									9619.62	6704.72	13715.9	7269.04	7091.31	11056.3	14837	17182.2	12202.7	9475.36	22326.5	15954.6	9242.81	15329.7	0.602933	0.016831	0.519515
M421T418	420.84184	418.2625	nodiff									15859.3	15431.4	16908.5	16063.6	14708.5	24927.5	16139.6	15840.1	19091.3	20183.5	18306.3	18231.1	17316.4	17965.3	0.963881	0.710145	0.322907
M183T171	183.00581	171.2320	nodiff									114303	161143	180376	137162	90032.6	124931	49949.8	137001	126945	151960	128541	147346	134658	123624	1.08926	0.597828	0.978047
M242T28	241.97586	28.4250	nodiff									42540.8	71078.8	14703.5	47356.6	56465.9	26436.7	9838.03	25525.8	16348.2	11554.1	11695.2	4598.7	43097	13260	3.25015	0.00681851	0.952858
M655T34_1	655.42290	33.8190	nodiff									13771.6	11137.4	15750.6	13521.6	12315.9	16134.7	42504.2	51841.6	26326.2	15867.8	34767.7	26049.4	13772	32892.8	0.418692	0.00496965	0.880915
M282T49	282.37883	48.8020	nodiff									24441.3	37532.8	15025.7	15759.4	11297.8	11992.7	13485.9	22595.1	16974.4	21197.5	19915.2	23922	19341.6	19681.7	0.982721	0.939958	0.263916
M253T416	252.91408	416.4465	nodiff									34270.3	37664.9	36715.5	34942.7	35928.4	32364.4	38555.4	34619.3	31191.9	29690.2	34292.3	35168.9	35314.4	33919.7	1.04112	0.372002	0.258258
M736T143	736.49401	142.9145	nodiff									19739.2	35963.2	36728.9	34383	15157.2	24960.2	25428.1	54421.5	27955.5	28760.4	38168.7	28638.4	27821.9	33895.5	0.820816	0.322833	0.46899
M751T103	750.51280	102.9460	nodiff									88095.8	27359.8	114918	86217.8	134793	75000.1	25085.4	114316	3524.48	2141.97	84292.5	4437.97	87730.7	38966.3	2.25145	0.0779007	1.18546
M399T107	399.18343	106.8220	nodiff									79999.2	6509.03	1721.83	22832.3	38461.1	6772.99	1284.66	2258.19	2353.49	2007.33	1712.67	1060.78	26049.4	1779.52	14.6384	0.0734956	0.676422
M1010T192	1009.61842	191.9640	nodiff									8129.61	1398.95	6349.19	19825.6	8300.85	16588.5	6829.95	2889.62	91.4728	276.399	81.1468	246.292	10098.8	1735.81	5.81789	0.0193084	0.517928
M866T37	865.50410	36.8620	nodiff									17372.4	6580.75	19838.2	18972.4	14399.3	4409.83	5460.91	6785.03	3444.09	3276.57	3044.83	2371.4	13595.5	4063.81	3.3455	0.00635634	0.48946
M757T129	756.55485	128.7020	nodiff									160601	142564	132059	159766	139642	36093.2	125994	129755	5933.35	3257.82	172401	35773.1	128454	78852.5	1.62905	0.190009	1.19743
M277T301	277.07303	301.0160	nodiff									74535.7	78557	107503	66325.1	58693	78948.3	90967.1	109774	86517.9	71416.3	130838	89561.4	77427	96512.6	0.802248	0.110039	0.996603
M784T174	783.63839	173.6290	diff									23930.9	15711.1	26305.8	27315	18342.1	25958.9	76006.2	92081.2	21509.3	11443.2	72239.7	55185.5	22927.3	54744.2	0.418808	0.0369309	1.05872
M123T72	122.97502	72.3630	nodiff									144129	79905.9	57493.9	245080	218896	8494.74	119332	215645	112666	109765	145074	158319	125666	143467	0.875927	0.67764	0.695577
M702T138	702.44334	138.0230	nodiff									54675.6	65363.7	49656.8	52246	5651.35	2170.07	75530.4	86452.4	4536.25	3567.4	92875.1	2615.35	38293.9	44262.8	0.865149	0.786338	0.471984
M188T381	188.10452	381.4245	nodiff									2376.02	1111.83	38360.2	2489.25	4258.31	3051.09	14823.4	523.661	8876.37	4789.72	747.984	11340.3	8607.78	6850.24	1.25657	0.789866	0.204511
M566T191	566.38150	191.3545	nodiff									12738	10179.9	15460.4	10926.1	16958.8	9493.35	21279.5	24775.6	16994.5	12659.9	24754.6	17425	12626.1	19648.2	0.642609	0.0127235	0.597006
M905T182	904.59287	181.7460	nodiff									17978.6	9959.19	31510.6	18509	5713.81	11442.7	22376.8	16785.8	17534.3	9185.51	24425.8	10346.8	15852.3	16775.8	0.944948	0.840945	0.216027
M445T108	445.33046	107.8610	diff									23834.2	13562	35964	44590.6	8331.88	23391.9	102422	122307	231190	72163.6	80016.2	83296.9	24945.8	115233	0.216482	0.00471245	1.87661
M577T63	577.48342	62.8110	diff									9350.29	3312.02	9863.58	6521.62	2656.3	5968.7	46964.4	77478.3	33667.1	15589.5	58704.1	39353.6	6278.75	45292.9	0.138626	0.00125323	1.27801
M269T28	268.96075	28.4250	nodiff									15481.4	25900.8	10111.3	15393.1	64208.4	11424.7	11284.6	12758.8	42286.1	18459.3	11166.8	19258.2	23753.3	19202.3	1.237	0.648843	0.0622723
M738T139	737.51437	138.6410	nodiff									59826.8	72967.9	79128.7	48590.1	53878.1	41853.1	45251.7	52447.1	30500.6	20750.7	56559.5	51624.9	59374.1	42855.8	1.38544	0.0725523	0.476164
M241T66	241.07230	65.6220	nodiff									54549.2	50751.1	44306.1	19219.3	70141.6	24759.6	43279.7	44597	16796.6	16931.7	83896.1	21243.8	43954.5	37790.8	1.1631	0.648968	0.54851
M523T360	522.86241	359.5140	nodiff									176944	183724	170746	111648	110012	164039	178497	122441	163479	27066.7	171443	181649	152852	140763	1.08589	0.673817	0.0404248
M866T107	865.57941	106.7310	nodiff									57810.6	63258.2	62497	64455.3	94418.2	194599	153391	74280.1	727.241	485.113	80991	91663.5	89506.3	66923	1.33745	0.500097	0.82375
M245T25	245.01171	25.2970	nodiff									23568.2	3666.72	2662.27	5665.58	22720.4	2522.72	3592.59	5248.17	4910.87	12588.5	2989	7485.14	10134.3	6135.72	1.65169	0.383175	0.124483
M163T85	163.01784	84.7020	diff									22479.7	15117.8	21188.1	9945.69	29660.3	2927.55	61100.4	40326.9	105682	40189.2	33500.1	68449.4	16886.5	58208	0.290107	0.00533149	1.28686
M825T360	824.72600	359.9465	nodiff									123851	137422	125511	135452	132523	88556.4	88501.6	129782	110672	76825.6	126338	103828	123886	105991	1.16883	0.143183	0.23059
M249T107	249.14896	106.9390	nodiff									68270.9	20910.9	16374.2	35639.3	47662.1	20908.8	49087.8	107983	53267.4	43638.6	115794	33978.1	34961	67291.5	0.519546	0.0792891	1.08624
M111T222	111.01934	222.2160	diff									69495.3	46379.2	52220.4	67958.8	55259.8	39183.1	11000.4	12571.2	9254.77	6499.14	10464.5	9865.05	55082.8	9942.52	5.54012	3.58299e-06	1.28784
M154T530	154.06188	530.4850	nodiff									76019.1	17963.7	18822.9	50852.7	16030.1	8538.62	11882.2	11416.7	8224.28	11311.9	11453.3	9175.77	31371.2	10577.4	2.96588	0.0822717	0.601406
M325T48	325.21495	47.9910	nodiff									20898.2	13258.2	17101.3	19126.7	14877.9	21878.4	24753.1	44793	33754.8	19085.8	32732.3	12782	17856.8	27983.5	0.638118	0.0650861	0.59553
M745T139	745.48202	138.6750	nodiff									44432.4	50465.9	46938.2	42602.4	39655	42221.3	38923.1	47638.3	62168.9	49828.5	43537.2	121718	44385.9	60635.6	0.73201	0.230407	0.788128
M195T576	194.90534	575.7315	diff									191799	365239	244731	156474	189286	80201.4	333401	348482	387649	402756	401877	300906	204622	362512	0.564456	0.00402095	2.59814
M534T187	534.30469	186.8160	nodiff									27398.6	28037.3	17897.9	29939.1	26071.8	23979.8	20269.5	30390.4	6502.49	5690.86	24213.4	10767.5	25554.1	16305.7	1.56719	0.0666831	0.557817
M534T196	534.27924	195.5710	nodiff									2068.36	30498.7	27201.5	5154.45	26631.8	23271.3	8394.24	4327.94	4625.24	6215.22	4297.55	10748.1	19137.7	6434.71	2.97413	0.0327111	0.556259
M247T222	247.01292	221.7380	nodiff									124654	112476	136214	126490	110125	110415	134934	166892	242718	27759.7	132819	172527	120062	146275	0.820799	0.388341	0.854324
M605T177_1	605.36720	177.3610	nodiff									10957.3	5388.42	2625.59	6717.8	3303.85	5851.02	6370.98	5421.48	31881.7	28888.2	11273.4	21144.5	5807.33	17496.7	0.33191	0.0363051	0.742065
M795T81	794.65452	81.3915	nodiff									4243.33	101510	2578.28	3958.59	1641.52	2885.12	2214.85	1707.3	1838.56	756.566	1381.87	2537.76	19469.5	1739.48	11.1927	0.305445	0.514807
M882T108	881.52007	107.7075	nodiff									103398	119802	88007	120659	112986	111201	54818.1	65643.3	83432.2	44853.3	91230.9	99516.9	109342	73249.1	1.49275	0.00509185	0.865907
M867T107	866.58886	106.8800	nodiff									53645.8	67564	74524.9	47327.3	50228.4	278205	52717.2	51321.3	596.109	414.027	106934	61645.7	95249.3	45604.7	2.08858	0.246945	0.997096
M408T28	407.98224	28.2730	nodiff									4498.96	10588.6	4881.02	23496.2	6110.01	17770.8	6456.54	7695.61	9031.12	9563.76	8713.78	4836.45	11224.3	7716.21	1.45464	0.309077	0.260257
M293T62_2	293.21131	61.6765	nodiff									23265.8	18631.8	12526.4	22616.2	7895.59	18875.9	22316.7	29955.6	23739	17237.5	24881.5	29007.5	17301.9	24523	0.70554	0.0419081	0.546177
M884T59_2	884.48272	59.0730	nodiff									21827.6	9098.39	32763.9	22625.5	25318.4	74247.2	12782.5	30596.7	15337.1	27556.9	4200.09	13237.6	30980.2	17285.1	1.7923	0.20315	0.52051
M293T543	292.89067	542.5400	nodiff									62417.6	71741.8	72607.3	98216.3	71691.8	81699	91492.9	74714	71122.2	71471.6	55043.4	71268.5	76395.6	72518.8	1.05346	0.587134	0.417295
M866T174	865.52554	173.5810	nodiff									44060.3	44414.2	41341.3	45976.5	37626.7	48208.1	42985.6	49404.6	10043.2	10069.8	39167.4	36237.9	43604.5	31318.1	1.39231	0.115218	0.5776
M661T26	661.28426	25.9170	nodiff									3863.96	9181.22	5760.04	11839.5	1037.74	37553.3	5858.44	7181.1	9038.97	6680.89	9121.26	6570.76	11539.3	7408.57	1.55756	0.466749	0.275882
M769T84	768.63653	83.7505	nodiff									1650.26	1237.59	13293.8	1442.84	1251.55	4982.25	1998.07	1872.05	425.54	211.797	9027.64	2152.93	3976.38	2614.67	1.5208	0.57707	0.062825
M111T119	111.01930	119.1465	nodiff									27424.8	36308.4	98937.4	28626.5	27922.7	14444.2	54853.1	65323.7	55488.4	59044.3	68252.8	82066.3	38944	64171.4	0.606875	0.081614	1.06496
M589T358	588.83424	357.6330	nodiff									155922	116962	141030	167826	115985	112287	110944	172927	114284	72665.2	136313	172164	135002	129883	1.03941	0.788087	0.268041
M510T173	510.38684	172.8905	nodiff									7519.83	2814.47	5322.25	3662.91	5624.08	4817.59	31608.4	29930.1	10050.7	7235.57	21871	15316.6	4960.19	19335.4	0.256534	0.00659971	0.734813
M111T426	111.00804	426.4460	nodiff									26457.5	27801.6	20870.1	27097.8	56756.6	25360.2	11068.1	12312.5	7407.87	5477.96	16441.8	8885.57	30724	10265.6	2.99289	0.00413924	0.8549
M134T171	134.04627	170.5830	nodiff									11660.6	38272	128634	10538.2	15186.6	20655.2	11758.7	8526.12	5858.48	11195.6	12659.1	9831.75	37491.1	9971.64	3.75978	0.172296	0.643553
M117T695	116.92786	694.9560	nodiff									68582.9	23133.2	47018.3	23341.6	29051.3	34289.6	28228.3	32399.7	37390.7	34240.6	24664.1	45279.9	37569.5	33700.6	1.1148	0.628865	0.423525
M281T184	281.24780	184.1770	nodiff									31503.5	25992	33586.5	26886.2	18268.7	30660.7	41009.1	42510.7	32269	26498.5	46018.4	33852.8	27816.3	37026.4	0.751255	0.0337019	0.673142
M521T182	521.33631	182.3170	nodiff									18621.2	13393	23161	29992.1	12531.1	9540.57	35322.7	47827	21701.1	16592.8	39076.1	29049.4	17873.2	31594.8	0.565699	0.0354211	0.732063
M313T409	313.11206	409.3110	nodiff									55374.1	35849.6	75498.8	69800	15941.8	48634.7	83068.4	21761.7	15221.6	15399.3	63580.8	15274.2	50183.2	35717.7	1.405	0.36256	0.392147
M735T44	734.53411	43.8030	nodiff									43038.1	61518.1	44083.4	55235.1	32477.3	34205.3	8531.07	27920.5	7244.56	20000	21763.1	17172.6	45092.9	17105.3	2.63619	0.000610807	0.946714
M309T33_2	309.22051	33.2550	nodiff									5903.42	6003.15	3967.83	4612.65	11225.7	15155.2	2191.8	5259.69	1864.08	3685.95	5438.16	1993.86	7811.32	3405.59	2.29368	0.044976	0.343268
M169T302	169.06139	302.4375	nodiff									19994.1	18597.8	21734.4	24516.7	31578.9	22165.2	37701.7	38999.3	28405.3	14937.6	44139.5	24799.7	23097.8	31497.2	0.73333	0.110387	0.62438
M757T155	756.59044	154.9725	nodiff									6409.64	11151	7820.48	9005.67	4243.08	8419.71	42289.7	15726.6	5354.33	5359.55	13853.6	9245.44	7841.59	15304.9	0.51236	0.223627	0.357723
M362T169_2	362.07687	168.8450	diff									137940	185288	215003	170889	37004.4	129188	205614	252636	278635	222456	276194	270062	145885	250933	0.581372	0.00390873	2.31966
M507T84	507.44044	83.6410	diff									23702.1	10830.3	27573.5	21484.6	8001.02	17860.5	86654.7	142580	103780	53871.1	100271	102046	18242	98200.5	0.185763	6.09177e-05	1.89634
M564T79	563.50261	79.2805	nodiff									40627.1	14308.2	65077.6	38464.1	15383.6	31442.5	63566.7	179756	72558	29880.6	62197.9	65387.9	34217.2	78891.2	0.433726	0.0743174	1.20542
M392T164	392.04847	164.1785	nodiff									2522.76	18704.3	5143.76	3739.65	12260.8	6931.04	9346.62	11045.1	3115.32	6441.57	3592.71	4809.33	8217.05	6391.78	1.28557	0.534377	0.150277
M283T141	283.26319	141.2560	diff									176764	173960	196707	199115	106878	138379	92636.5	158371	82128.9	68165.9	83723.5	132849	165301	102979	1.60519	0.0123373	1.23391
M633T49	633.48321	48.6300	nodiff									6923.79	6171.22	6880.19	4994.88	1913.59	19140	6850.35	7338.22	8167.36	6027.05	6208.66	7374.9	7670.62	6994.43	1.09668	0.78726	0.166713
M414T35_1	414.22972	35.3860	nodiff									11476.2	8245.92	7840.62	18291.6	6333.19	19205.9	6158.56	6453.05	4287.89	2535.5	3723.43	4940.01	11898.9	4683.07	2.54083	0.0119453	0.475344
M189T268	189.06630	267.7645	nodiff									32233.7	13076.4	55991.5	9636.57	49415.1	33671.5	62199.9	56616.2	37915.2	35192.8	63588.5	45415.8	32337.4	50154.7	0.644754	0.0796513	0.831097
M284T48_2	284.49035	47.8045	nodiff									15797.3	10551.9	9833.49	21106.3	6267.41	11815.5	24932.8	22268	15062.8	22288.8	15097	23657.9	12562	20551.2	0.611253	0.0162048	0.540555
M157T416	156.92623	416.3955	nodiff									39602	45806.4	35807.4	41748.1	48829.7	35038.8	38689.9	28488.7	31129.9	27550	39866.2	38488.3	41138.7	34035.5	1.2087	0.0503622	0.234813
M951T354_2	950.92900	353.9440	diff									65415.3	60207.5	56584	73347.3	71469.1	62969.6	60002.4	67296.5	3923.48	1365.21	55757.1	17727.3	64998.8	34345.3	1.89251	0.0343384	1.08073
M239T107	239.16455	106.5730	nodiff									146505	61630.7	31385.6	135020	55061.6	90166.5	42219.1	112558	25749.8	47727.2	48909.3	24366.4	86628.2	50255	1.72377	0.144492	0.805897
M764T175	763.55278	174.7070	nodiff									31565.7	25665.6	34446.9	35271.2	33984.9	39403.7	38227.6	57707.4	29403.4	13449.2	41179.5	39296.9	33389.7	36544	0.913684	0.624189	0.362949
M822T144	821.56735	144.3790	nodiff									173417	83795.4	85325.5	285095	130783	256633	116551	212248	85175	79036.7	227218	78984.6	169175	133202	1.27006	0.441515	0.682117
M823T154	822.56994	154.0260	nodiff									191586	155096	121809	155595	127875	56845.8	138020	122730	102133	89992.1	171628	113227	134801	122955	1.09635	0.602691	0.0744017
M432T34_1	432.27788	33.9440	nodiff									16227.8	12504.9	19869.5	15095.4	12158.7	9201.94	14198.3	18222.7	9609.15	8143.96	10102.5	11325.4	14176.4	11933.7	1.18793	0.319064	0.0939095
M432T34_2	432.31412	33.8215	nodiff									8662.94	5496.72	10353.1	10021.1	15453.5	8106.18	14502.7	20359.4	13000.4	8702.13	6644.93	12560.8	9682.25	12628.4	0.766706	0.243552	0.301653
M539T106	539.42984	106.2190	diff									11586.8	4118.01	15680.2	10994.5	3503.03	3947.94	38469.5	73484.1	34068.7	15617.9	35763.6	54051.2	8305.08	41909.2	0.198168	0.00237261	1.16526
M315T43	315.19425	42.7635	nodiff									55876.1	13189.1	4206.8	32307.7	23720.7	17668.3	24376.7	46632.5	18731.1	18438.1	24898.4	23732.7	24494.8	26134.9	0.937244	0.851179	0.171798
M902T189	901.54504	188.6365	nodiff									56029.7	64295.7	64234.7	68602.5	62131.3	63749.4	82582.2	57396.8	12735.4	8865.4	71887.3	31768.6	63173.9	44205.9	1.42908	0.168245	0.791812
M408T189	408.28244	188.8820	nodiff									1100.18	1087.15	23826.7	31715.3	780.18	15519.1	3620.86	4065.22	1378.04	965.215	2013.29	2957.83	12338.1	2500.07	4.93509	0.104659	0.474432
M449T55	449.24816	54.8140	nodiff									13286.8	5884.23	15054	6866.27	10008.4	5333.41	5594.59	12218.7	31634	19521	5412.57	3470.33	9405.51	12975.2	0.724884	0.469491	0.475021
M353T112	353.23209	111.9930	nodiff									32874.7	41971.9	5398.02	29325.8	58783.4	14469.8	79284.1	103474	18736.7	23142.1	88112.5	63305.5	30470.6	62675.8	0.486162	0.0754034	1.13677
M757T111	756.55433	111.4440	nodiff									151667	77550.9	112659	125752	108994	92864.8	75556.8	175568	2977.28	2217.2	55197.9	2816.39	111581	52388.8	2.12986	0.0742245	1.29947
M700T288	699.96019	287.5460	nodiff									40199.5	38676.2	33585	24837.8	62989.4	29308.8	38018.9	45110	36232.2	11437.3	49433.8	33119.2	38266.1	35558.6	1.07614	0.732195	0.446015
M342T387	342.13834	386.9845	diff									98187.7	112007	118433	130400	88538.8	103486	60841.4	56416.2	22452.7	21216.8	68308.5	25436.6	108509	42445.4	2.55643	0.00010844	1.55995
M421T49	421.36588	48.8110	nodiff									14716.9	6000.64	5830.37	13283.3	2336.05	4280.59	24396.7	28390.7	36729.5	19446.2	25100.6	26232.7	7741.31	26716.1	0.289762	0.000117495	0.924979
M150T635	149.99381	635.1860	nodiff									90033.7	78943.8	96908.4	386893	80338.5	124483	99903.3	113758	108438	89703.7	89664.2	111437	142933	102151	1.39924	0.428772	0.707491
M646T36	645.59895	35.6990	nodiff									1651.37	6904.18	11088.2	3718.18	1461.09	20059.5	4299.26	277.46	790.261	1473.96	79.7946	2374.06	7480.42	1549.13	4.82878	0.0755657	0.400588
M359T164	359.07670	164.4680	nodiff									26006.6	18006.2	7385.11	33958.9	67283.2	20806.8	8626.75	9396.61	3335.48	2342.75	8009.69	3349.93	28907.8	5843.54	4.94697	0.0226684	0.894197
M489T24	489.27689	24.1850	nodiff									14045.8	16920.3	17080.3	16368.6	12652	19158.9	17154.9	18625.1	8023.9	6584.8	16077	11151.5	16037.7	12936.2	1.23975	0.202111	0.239013
M537T62	537.48706	62.1990	diff									12003.6	8072.22	15109.2	13341.7	6252.55	8977.66	37351.4	61663.2	56166.6	31688.3	43855.6	48937.6	10626.2	46610.4	0.227978	2.14706e-05	1.28592
M540T194_1	540.27044	193.7900	nodiff									6000.05	12361.5	8308.7	17632.6	7975.92	19162.1	11349.8	12347.2	12664.5	7131.69	45876.7	7763.9	11906.8	16189	0.735489	0.519434	0.268154
M870T184	869.55342	184.1705	nodiff									41014	14591.5	20448.1	30156.3	24019.8	28809.4	36366.2	35466.1	7230.56	4963.92	35925.4	18834.2	26506.5	23131.1	1.14593	0.644052	0.360489
M467T131	467.37256	130.5425	diff									32576.1	22077.4	52891.7	28491.1	10507.5	14107.2	114756	143899	113084	59967.3	107749	330303	26775.2	144960	0.184707	0.0129765	1.99555
M182T45	181.99398	45.1560	nodiff									34949.2	8764.33	1403.79	1764.12	10029.6	3275.36	1060.12	10817.2	45041.3	21314.4	2939.92	58869.2	10031.1	23340.4	0.429774	0.253374	0.709041
M600T36	599.50051	36.2720	nodiff									16982.7	14334.2	10875.8	15212.1	5694.96	15543.6	8333.6	5790.47	1011.05	225.028	3606.1	2291.95	13107.2	3543.03	3.69943	0.00109352	0.581237
M436T36	436.24971	35.6300	nodiff									11249.8	15695.6	20789.1	12762.1	7644.38	7127.63	8373.91	6654.01	2432.22	3605.27	6853.35	4570.16	12544.8	5414.82	2.31675	0.0111624	0.424813
M216T311	216.09822	310.9615	nodiff									12347.3	18185.3	10274.8	19516.2	37593.3	10762.2	8415.58	5560.06	5130.08	4057.44	8369.43	3687.02	18113.2	5869.93	3.08576	0.0170945	0.635284
M253T229	252.99994	229.1750	nodiff									18150.5	2316.76	933.52	22013.3	56068.5	17759.1	1571.66	1443.38	21056.8	14175.2	1435.73	1612.9	19540.3	6882.61	2.83908	0.183823	0.415477
M253T238	252.96470	238.2475	nodiff									31248.5	39818	50007.3	90008.6	86688.7	55423.9	97315.4	35059	58440.3	27706.4	61063.9	68354.6	58865.9	57989.9	1.0151	0.952098	0.24008
M573T33	573.43662	32.6110	nodiff									3971.42	7370.01	10033	14446.1	2016.81	13931.3	14636.5	12989.6	3235.12	1105.67	2792.23	8496.48	8628.11	7209.27	1.19681	0.659905	0.127067
M827T354	826.91500	354.0395	diff									82959.8	80472.9	74971.5	87695.7	90093	82804.1	79776	83550.2	6539.05	3015.69	74626.1	34716.4	83166.2	47037.2	1.76809	0.0400472	1.16817
M927T354_2	926.96756	354.0190	diff									62030.5	58082.7	52011.6	66842.1	68294.6	62338	53275.2	64582	3940.83	1200.63	52977.4	16562.1	61599.9	32089.7	1.91962	0.0302565	1.06601
M772T149	772.47638	148.9450	nodiff									2728.49	9763.2	13482.5	6096.74	11463.3	3210.57	3690.12	22109.9	2443.92	3305.04	16574.9	5893.89	7790.79	9002.95	0.86536	0.758583	0.251592
M215T229_1	215.05349	228.9240	nodiff									10991.9	5899.51	10627.9	10013.5	5738.15	13451.7	8867.46	44861.5	7898.3	4152.17	14003.2	14545	9453.78	15721.3	0.601336	0.333653	0.360696
M809T138_1	808.58552	138.0180	nodiff									51806.3	63083.7	65973	42920.6	58412.2	39543.3	51521.6	34246.7	30200.4	19706.2	34048.5	36204.7	53623.2	34321.4	1.56238	0.00996022	0.669159
M401T34	401.34080	34.4660	nodiff									6097.74	7070.68	4727.8	7865.01	4402.92	4565.24	1479.02	1409.32	629.923	279.243	604.883	1158.85	5788.23	926.875	6.24489	1.54839e-05	0.430818
M230T155	230.02459	154.5785	diff									71397.5	112309	89329.6	89123.6	55469.8	55989.7	103296	77397.3	133428	140105	106247	98556.4	78936.5	109838	0.718661	0.0403284	1.27572
M337T29	337.03768	29.3295	nodiff									31011.9	12366.4	13524.6	12776.5	13500.3	8908.71	34793.5	53820	26739.4	25832.7	42851.6	20498.6	15348.1	34089.3	0.450231	0.0108763	0.872305
M872T137	871.58399	137.4335	nodiff									53352.3	66732.5	40871	29284.5	56346.9	74645.2	36968.8	43583.3	30392.2	27317.5	47721.9	40240.5	53538.7	37704.1	1.41997	0.0603947	0.539137
M391T174	391.32068	174.1955	diff									7380.37	7482.81	19120.1	5186.56	2550.14	5982.92	52715.3	90587.4	40458.9	10275.5	43860.6	42506.9	7950.48	46734.1	0.170122	0.00500629	1.22356
M260T44	260.24538	43.5550	nodiff									9105.52	9569.48	12950.6	1292.59	6826.98	7861.22	11599	8361.05	30092.8	6125.87	12063.1	21983	7934.4	15037.5	0.527641	0.110641	0.511187
M996T191	995.61195	190.7840	nodiff									14610.4	9819.3	16579.2	12806.6	9501.02	8973.16	21767.9	18462.2	17589.7	8504.93	20026.8	10236	12048.3	16097.9	0.748438	0.144198	0.393408
M120T50	119.97536	49.7870	nodiff									53529.6	51823.3	38049.6	44335.3	116295	61906.9	37152.8	82232	60657.6	43206.3	53913.8	39326.7	60990	52748.2	1.15625	0.554541	0.306136
M605T356	604.86590	356.0630	nodiff									125203	127037	119164	121597	113376	125110	118896	115897	55078.6	31248.4	118112	100468	121914	89949.9	1.35536	0.0660941	0.912867
M158T211	158.06048	211.0535	nodiff									117399	88165.1	116970	136918	48313.8	79056.9	119210	123939	121640	88501.9	108837	117046	97803.8	113196	0.864024	0.303537	0.997922
M279T108	279.10134	108.1200	nodiff									5756.36	11255.8	69944.9	12589.3	21075.4	8870.03	13255.4	10851.5	9630.38	11872.1	25389.6	8988.86	21582	13331.3	1.61889	0.437671	0.192783
M210T192	210.04722	192.4450	nodiff									3976.73	7137.66	5683.12	3905.55	10515.3	6410.04	12680.7	26695.1	18007.4	6622.3	18993.4	17408.9	6271.41	16734.6	0.374756	0.0049425	0.662303
M631T48	631.47083	47.9125	nodiff									14553.6	6064.66	23845.6	11551.7	4972.88	21288.7	13901.3	18600.9	22357.9	21117.9	13209.9	17356	13712.9	17757.3	0.772236	0.275768	0.525454
M494T161_2	494.12012	161.4060	nodiff									19121	20292.7	64427	11758.4	19101.2	14652.7	18729.9	29671.8	11971.3	4203.66	28055.5	17568.7	24892.2	18366.8	1.35528	0.481713	0.12857
M520T184	520.33541	183.5555	nodiff									14387.2	14026.9	7926.92	15711.6	13738.2	8581.43	10460.2	18156.3	30414.2	28706.2	16591.9	21980.2	12395.4	21051.5	0.588812	0.0281032	0.62962
M261T229	261.02871	228.7850	nodiff									11295.6	28257.3	9849.45	15778	32580.2	51290.6	17059.4	18895.2	10914.8	8430.71	17895.3	20850.9	24841.9	15674.4	1.58487	0.20636	0.447799
M839T108	838.52565	107.7565	diff									88034.3	122391	106180	144124	136454	145365	79468.8	60780.7	39049.4	54325.9	61395	62284.8	123758	59550.8	2.07819	0.00014014	1.53696
M558T194	558.27900	193.8910	nodiff									6849.39	3122.08	3779.13	19381.9	4048.47	17963.7	5347.08	3556.29	4000.46	2942.8	6577.55	4253.09	9190.78	4446.21	2.0671	0.156374	0.321782
M233T232	233.07709	231.5380	nodiff									57296.9	28343.1	4744.07	70172.3	12363.6	11832.4	24028.3	17273.3	3471.48	7359.36	44790.2	6439.91	30792.1	17227.1	1.78742	0.310915	0.437123
M661T57	661.44463	56.7350	nodiff									1754.23	1498.81	455.699	1148.7	2022.07	21143.3	1147.35	1095.6	828.275	978.297	848.418	1209.32	4670.47	1017.88	4.58844	0.294641	0.270581
M259T389	259.06499	388.7300	diff									114158	169732	115961	174399	172884	139348	57697.1	37391.8	44327.9	51922.5	74915.7	27995.9	147747	49041.8	3.01268	2.41089e-05	1.92675
M265T110	265.14510	109.7465	nodiff									75836.8	41670.4	25892.3	53082.4	123102	17070.8	32242.8	92400.6	28160.5	48004	39788.6	20277.2	56109.2	43478.9	1.29049	0.521783	0.444993
M687T355	686.86915	354.6010	nodiff									112588	109509	103431	116234	109446	109788	110285	109688	33443.2	17274.7	102120	73818	110166	74438.2	1.47997	0.0576555	1.08103
M201T212	201.02510	212.1450	nodiff									118544	131509	114171	116720	118998	115985	130376	113331	166668	477477	39929.5	228927	119321	192785	0.618935	0.26632	1.89296
M417T36	417.26322	36.0010	nodiff									17632.6	5950.18	20286.2	18564.8	17226.4	14182	12030	13016.1	4706.41	2192.66	6545	9456.02	15640.4	7991.03	1.95724	0.0185851	0.441319
M167T62	167.10724	61.5480	nodiff									12283.1	9646.7	13176.3	11957.8	6966.49	7663.28	27042.4	14581.9	9814.55	11449.3	48592.2	22778.7	10282.3	22376.5	0.459511	0.0715574	0.621944
M1050T190	1049.68007	190.4880	nodiff									6600.09	7127.33	14905.3	7781.76	6577.71	4668.68	26054.9	20020.9	18319.4	9610.64	18572.9	14949	7943.49	17921.3	0.443243	0.00379565	0.645681
M388T46	388.20924	46.4750	nodiff									7013.8	8789.73	10736.5	23064.7	2098.29	14191.3	9496.51	10243.9	10040.7	4961.17	6112.18	9842.11	10982.4	8449.43	1.29978	0.428176	0.216754
M760T143	759.51516	142.9060	nodiff									96467.6	55040.7	76915.9	65389.4	75278.7	53887.4	49559.8	42268.3	32053.8	34634.8	44796.9	42295.1	70496.6	40934.8	1.72217	0.00184791	0.855819
M534T81	534.46034	80.8050	diff									24743.4	11562.3	47840.2	22939.4	6890.25	17091.3	64844.4	179152	76623.2	38357.7	142666	77652.9	21844.5	96549.4	0.226252	0.00766679	1.74093
M629T359	628.82735	358.6350	nodiff									125218	114242	119829	84973.9	84437.6	94954.6	113511	125659	84908.8	56231.6	84625.8	121141	103943	97679.5	1.06412	0.646608	0.187698
M886T146	885.54432	146.2940	nodiff									62714.7	76980	129572	71358.4	68997.9	53933.1	55969	56216.5	25597.2	53609.4	56930.3	47981.7	77259.4	49384	1.56446	0.0427161	0.691415
M451T87	451.37789	86.6600	diff									19107.4	7521.29	27926.7	13755.6	5162.71	7362.89	134537	207509	245291	48884.3	136744	184651	13472.8	159603	0.0844145	0.000425001	2.44968
M275T219	275.05714	219.3545	nodiff									26750.8	40436.2	45722	35113.6	24082.4	26782.1	43450.1	32331.9	31483	23362.9	38799.1	41982.7	33147.9	35234.9	0.940766	0.667663	0.343842
M134T46	134.02280	45.7240	nodiff									1171.06	2464.06	8053	12613.5	3535.53	9934.86	11122	12495.7	15116	16976.1	37742.4	11364.6	6295.34	17469.5	0.360362	0.0342388	0.599937
M319T242	319.13886	241.7545	nodiff									872.962	1063.39	719.663	913.598	1372.47	688.885	7087.03	7677.6	2675.05	3920.6	50052.5	7540.33	938.496	13158.8	0.0713205	0.130952	0.582752
M745T107	745.48133	106.8085	nodiff									96135.1	82263.6	62733.8	108645	119219	48766.3	119602	133035	5208.17	3878.69	158107	26396.8	86293.8	74371.4	1.16031	0.705594	1.06936
M247T300	247.06242	299.9065	diff									56839.9	68806.6	78589.4	63226.7	26180.9	74498	82654.1	97254.4	91992.1	81554.8	77642.3	86398.9	61356.9	86249.4	0.711389	0.0130814	1.151
M883T132	882.54871	132.1060	nodiff									146598	326284	159159	311746	318650	150147	200666	208109	32165.3	54909.1	196609	109368	235431	133638	1.76171	0.0661072	1.87048
M237T336	236.91704	335.6645	nodiff									4775.4	3598.91	3687.57	8307.25	58687.7	4955.44	4585.24	71017.3	2802.97	1580.01	63851.7	10308.3	14002	25690.9	0.545019	0.482616	0.799195
M885T354_2	884.95710	353.9670	diff									65724	56989	54679.9	67570.5	64409.4	64806.8	55681	66222.2	3851.49	1683.63	53834.8	18557.4	62363.3	33305.1	1.87249	0.0343762	1.03721
M758T40	758.47774	40.2720	nodiff									7368.47	12877.4	49656	13211.2	9594.24	19329.2	32503.7	26230	12806	12142.7	27306.9	24510.5	18672.7	22583.3	0.826838	0.601362	0.27767
M791T178	790.54048	178.0020	nodiff									30358.4	40370	54210.3	30962	7337.19	27328	27646.3	57143.4	37338.6	19592.6	49701	40341	31761	38627.1	0.822245	0.436191	0.503181
M226T150	226.14411	149.8490	nodiff									9946.92	4328.63	7595.07	6753.43	3267.57	5974.98	20657.1	23002.3	14546.1	15521.3	55805.3	13554.1	6311.1	23847.7	0.264642	0.0246754	0.784013
M397T588	396.86430	588.3355	nodiff									122436	112617	127914	113335	102979	146613	122100	135548	126075	118506	159848	117391	120982	129911	0.931269	0.346459	0.827064
M769T354_2	768.87325	354.2380	diff									81719.9	82000.2	78650.7	84575	82543.5	79609	76042.5	78605.6	14699.4	5568.03	77108.3	45046.2	81516.4	49511.7	1.64641	0.0396627	1.05799
M574T107	574.45458	107.4120	diff									32291.3	6668.9	13495.2	14497.4	5799.48	6855.82	42203.6	76257.7	44520.4	47036.4	47309.1	43653	13268	50163.4	0.264496	0.000254599	1.27122
M116T269	116.04978	268.9475	nodiff									2155.44	15620.2	18413.2	2482.02	17417.6	14970.1	44651.9	42194.4	17970.3	16497.7	1948.85	35934.3	11843.1	26532.9	0.446355	0.0810845	0.599703
M243T104	243.19522	104.0830	nodiff									49499.7	21760.8	20563.9	35486	13553.5	36983.3	22046.6	49202.1	22852.5	11572.1	32722.9	29721.8	29641.2	28019.7	1.05787	0.833409	0.0113033
M239T106	239.20195	106.1855	nodiff									8004.43	40796.2	19536.4	49488.6	5113.35	4098.17	6296.3	12284.9	24585.8	19692.5	32154.2	26579.3	21172.9	20265.5	1.04477	0.920731	0.275842
M336T590	335.90070	590.1840	nodiff									158685	174324	131008	136400	145748	117848	124203	156571	132486	131166	115848	133451	144002	132287	1.08856	0.266804	0.530961
M157T437	157.01349	437.0700	nodiff									1722.81	1616.55	8165.66	1404.16	3210.27	1379.05	7784.86	6335.51	4709.65	5726.03	5125.79	3629.2	2916.42	5551.84	0.525307	0.0583242	0.307689
M831T142	830.59492	142.1500	nodiff									57997.1	61408	50107.8	52168.4	51841.6	63628.1	27993.7	52247.5	24918.9	19084.1	64414.7	47420.8	56191.9	39346.6	1.42812	0.0528126	0.591441
M112T24	111.94633	24.0620	nodiff									5300.29	6897.57	2926.22	5412.7	13709	3620.08	2053.26	2049.77	3573.77	2708.29	1618.15	1580.29	6310.98	2263.92	2.78763	0.0313367	0.317119
M727T111	726.51060	110.8155	diff									154525	97676.3	127201	155621	130191	102138	94877.6	123137	6326.72	6006.82	63558	8024.18	127892	50321.8	2.54148	0.00752936	1.62989
M975T354_2	974.89094	354.0395	diff									68077.9	57655	56513.8	69443.6	68037.7	64144.1	57466.1	67221	3840.83	951.181	58512.2	18644.1	63978.7	34439.2	1.85773	0.0391068	1.04874
M800T39	799.54211	38.7335	nodiff									5319.95	6072.84	8961.4	5082.09	5547.79	4674.22	4819.76	5771.4	1349.83	735.952	2113.33	2938.46	5943.05	2954.79	2.01133	0.0155726	0.284795
M684T288	683.98232	287.5560	nodiff									41302.6	39631.8	39078.7	28175	64311.8	36707	41603	43048.9	45803.1	9819.52	54852.4	43996.9	41534.5	39854	1.04217	0.837968	0.383983
M468T193	468.30002	193.1940	nodiff									788.491	1827.48	7752.74	6597.79	10137.9	2142.16	9999.06	3995.27	1365.36	1039.08	1454.75	648.185	4874.43	3083.62	1.58075	0.421232	0.205673
M602T36	601.51551	36.2840	nodiff									14209.5	14798.6	9465.73	10463.1	5787.06	18403.9	2759.62	1780.26	738.552	193.356	705.376	768.115	12188	1157.55	10.5292	0.000153675	0.647696
M153T162	153.03003	161.9750	nodiff									39274.4	44796.3	79969.6	30098.3	38016.1	33018.8	45456.9	48802.7	30884.8	17876.3	47236.9	39728	44195.6	38330.9	1.153	0.525272	0.0447575
M848T190	847.53462	189.8660	nodiff									28213.8	16749.8	18447.3	25236.6	15088.8	13732.2	27563.6	30336.9	6196.42	4716.96	18884.5	14568.7	19578.1	17044.5	1.14864	0.620262	0.245541
M671T356	670.83810	356.3995	nodiff									112524	108770	102253	117172	120320	114739	112085	109054	54664.6	34355.6	111157	104223	112630	87589.9	1.28588	0.107501	0.818364
M265T50	265.21584	49.8090	nodiff									12531.3	8054.69	7646.96	8701.06	5963.47	15611.1	11876.9	22258.8	28060.4	17299	14865	30260.2	9751.44	20770	0.469495	0.00813372	0.686016
M775T148	774.59167	147.9340	nodiff									41779.3	31782.5	62120.3	44268.5	22988.9	36111.5	37969.9	45123.3	23369.2	23442.8	51076.2	35412.1	39841.8	36065.6	1.10471	0.606691	0.114453
M364T48	364.20798	47.6320	nodiff									6528.29	15483.2	15729.8	10438	13157.3	30405.5	16019.6	7361.31	12799	14694.1	12329.6	13824.1	15290.3	12837.9	1.19103	0.505557	0.215396
M541T171	541.17496	170.7750	nodiff									3513.67	5366.32	52735.2	2745.95	2119.1	2675.91	1648.96	2534.04	2291.48	4004.66	1072.56	2489.12	11526	2340.14	4.92537	0.292378	0.346452
M61T341	60.99274	341.0140	nodiff									199968	152593	123871	163852	201751	164862	179059	193807	168150	172728	144406	158483	167816	169439	0.990423	0.909543	0.584544
M592T33	592.40405	32.5715	nodiff									1997.12	760.928	7582.3	1201.35	993.478	390.192	2876.95	4149.73	411.003	115.326	2501.28	1856.83	2154.23	1985.19	1.08515	0.896908	0.0285724
M695T179	695.46534	178.6250	nodiff									10170.8	10120.9	49340.2	9616.17	12951.4	10351.8	20377.2	12288.4	8621.99	7772.98	75304.6	32664.9	17091.9	26171.7	0.653067	0.479487	0.454068
M547T109	547.43508	108.5705	diff									26633.9	7701.38	29564.4	18792.6	5228.82	6171.41	57003.8	99726.3	58108.1	30696.4	61854.3	52651.8	15682.1	60006.8	0.261339	0.00140878	1.39438
M196T32	196.00961	31.6570	nodiff									13965.4	22616.6	24729.2	13171.1	27826.7	29357.3	32197.6	37297.5	20977.4	15241.5	13395.6	15994.5	21944.4	22517.4	0.974555	0.909933	0.112888
M872T142	871.62263	141.7600	nodiff									47275.7	16864.9	34885.6	45700.8	48685.3	20068.1	32254.4	38781.4	41509.6	34232	18856.3	35084.3	35580.1	33453	1.06358	0.754468	0.250266
M183T110	183.00517	109.7900	diff									54011.9	63016.6	50519.7	56290.9	40402.8	52049.7	56434.2	50142.4	149288	125718	56478.9	120659	52715.3	93120.1	0.5661	0.0492704	1.44396
M518T190	518.32421	190.2450	nodiff									13590.6	8616.04	11085.7	6844.14	7678.2	14101.4	15035.5	15015	29221.8	34302.6	16435.1	20810.7	10319.4	21803.5	0.47329	0.00910337	0.731072
M377T54	377.19896	53.6165	nodiff									101650	18083.6	8821.24	55350.7	20057.2	37133.8	37589.7	13043.6	12202.1	14050.3	13926.8	8432.52	40182.7	16540.8	2.4293	0.137888	0.643004
M326T49	326.20857	48.5670	nodiff									19843.6	7280.59	10444.3	11463.7	9502.48	17727.2	14425.2	14526.5	25390.9	24329.4	19819.9	18605.1	12710.3	19516.2	0.65127	0.0343903	0.573643
M155T44_1	154.94661	43.6900	nodiff									42346.2	54888.4	37399.3	38267.4	50369.8	18252.7	31677.4	29158.6	35817.7	45655	28168.2	30568.2	40254	33507.5	1.20134	0.276215	0.289317
M378T131	378.08387	131.3070	diff									16051.1	18127.1	16240.8	20358.3	9499.55	11915.1	31519.2	32297.7	115253	79957.2	22731.4	76455.5	15365.3	59702.4	0.257365	0.0144941	1.41958
M197T123	197.01409	123.3240	nodiff									32355.3	30168	34708.2	10841.3	21602.8	55189	22680.7	9712	10015.7	17283.3	14046.9	23374.7	30810.8	16185.6	1.9036	0.0487564	0.581818
M274T107_2	274.22212	106.9590	nodiff									29743	5818.24	11723	22094.5	9627.27	9300.04	22093.5	48140.2	18199	8507.25	28442	15436.8	14717.7	23469.8	0.627091	0.225167	0.499042
M536T63	536.47516	62.6190	diff									9987.93	8091.5	11103.1	9442.74	2904.19	7595.41	36162.9	55470.3	53626.9	34195.5	41553.1	49361.2	8187.47	45061.6	0.181695	2.52247e-06	1.30323
M554T289	554.15726	289.3900	nodiff									84880.5	94772.3	65152.5	67450.9	84254.1	86665.8	83673.8	77956.5	91695.6	70577.3	86636	80511	80529.4	81841.7	0.983965	0.820121	0.465003
M522T189	522.39085	189.2560	nodiff									7186.91	9790.74	8115.85	8480.44	7815.06	6193.87	11139.6	7920.1	3492.51	4445.34	10348.8	3857.79	7930.48	6867.36	1.15481	0.487254	0.140287
M207T80	207.10251	79.8185	nodiff									57778	11130.8	14608.9	24923.7	85795.3	23273.6	17340.5	15135.8	3888.93	14691	16192.5	15512.5	36251.7	13793.5	2.62817	0.0945319	0.729474
M540T180	540.27907	179.7930	nodiff									7802.86	4343.1	10215.1	10510	5847.25	20373.6	7253.38	7521.34	1515.18	5893.57	6925.05	5318.46	9848.67	5737.83	1.71644	0.130467	0.293131
M473T28	473.28146	27.7085	nodiff									21565.1	23767.3	19605	28244.9	13372.8	31112.7	23773.6	25472	15932.9	12130.3	23186.7	18838.9	22944.6	19889.1	1.15363	0.381518	0.165158
M505T175	505.34749	174.9260	nodiff									9439.13	11544.8	6262.69	6959.08	6330.6	6127.07	15303.7	22366.1	14144.4	9576.73	15538.7	24299.4	7777.23	16871.5	0.460968	0.0036884	0.606153
M307T316	307.08350	316.1970	diff									32007.1	40509.1	77593.8	36426.4	12276.8	39468.7	95849.1	90547.6	50136.4	26976	110652	74335.6	39713.6	74749.5	0.53129	0.0463709	1.11121
M96T282	96.01970	282.4300	nodiff									153283	107440	188688	205815	83383.2	153732	71846.5	89017.9	42491.2	45886.9	197564	124714	148724	95253.4	1.56135	0.110749	0.892955
M844T185	843.54156	185.3780	nodiff									8972.55	11047.9	13286.9	13395	7041.99	7549.41	13328.6	19664.7	4908.52	3159.35	17309.8	9453.15	10215.6	11304	0.903716	0.719149	0.212687
M451T182_2	451.30432	182.3440	nodiff									4500.86	3801.83	3454.77	3919.04	3889.9	1576.5	14426.3	15496.9	26207.3	3208.88	8463.88	7806.15	3523.82	12601.6	0.279633	0.0209815	0.541297
M633T354	633.03515	354.0340	nodiff									56503.4	47934	47670.7	56672.4	61237	56667.5	50188.6	55239.8	4627.1	985.441	47883.7	14969.8	54447.5	28982.4	1.87864	0.0337563	0.9866
M555T80	555.44071	79.9760	diff									50176.1	20313.6	42675.9	40745.1	18453.4	28837.5	85685.4	120160	99955.9	50428.9	107949	92672.9	33533.6	92808.8	0.361319	0.000333544	1.65752
M389T181	389.30432	180.7670	diff									4832.14	4720.46	14228.8	2873.01	1068.05	2686.86	42733.4	61739.5	20228.4	8014.28	36169.9	33053	5068.22	33656.4	0.150587	0.00435868	1.05191
M589T48	588.50424	48.0250	nodiff									6894.77	4212.97	3674.17	10724.3	2395.84	30977	6021.24	8865.97	8558.27	9355.24	5348.52	9062.1	9813.17	7868.55	1.24714	0.671946	0.21936
M851T354	850.87707	354.0395	diff									69368	65232.2	66468.7	70037.8	68574.1	68740.7	66088.6	65144.1	10166.4	3763.42	61963.2	31126.5	68070.3	39708.7	1.71424	0.035573	1.00274
M846T172	845.63147	172.4530	nodiff									42580.5	34086.7	48142.3	63788.8	40760.7	47182.7	73285.8	84471.2	27082	16645.2	73023.8	59193.7	46090.3	55617	0.828709	0.444512	0.570171
M421T62	421.33082	62.1680	diff									8253.46	4027.02	12349.9	6288.07	2655.21	4182.99	32258.6	46122.1	40175.6	20161.7	31413.5	36500.5	6292.77	34438.7	0.182724	2.82709e-05	1.13236
M226T135	226.14397	135.0910	nodiff									36918.5	2932.53	24226.7	18317.6	9398.78	6850.7	64579.4	41030.3	15892.4	10646.1	79773.7	26850.3	16440.8	39795.4	0.413134	0.0889407	0.866024
M425T187	425.18076	186.5150	nodiff									33161.9	7223.16	1554.95	9548.85	24453.1	5716.03	11031.6	19671.3	4601.58	4591.04	8010.96	5638.5	13609.7	8924.18	1.52503	0.420633	0.294063
M804T166	803.52905	166.3935	nodiff									11913	10400.4	21490.6	8800.12	8082.86	1950.49	19297	25391.6	11522.6	5656.93	30010.4	19025	10439.6	18483.9	0.564792	0.102038	0.551596
M737T138	736.52680	137.9960	nodiff									17431.8	40752.3	53680.5	40364.4	27741.2	28855.5	38189.9	59256.9	17417.2	39415.3	63449.9	27533.1	34804.3	40877.1	0.851438	0.512127	0.352299
M183T31	183.02960	31.3500	nodiff									18188.6	20270.7	8111.73	23384.1	45930.1	26403.6	10970.5	13653.1	14547.3	14080.8	15536.8	12319.2	23714.8	13517.9	1.75432	0.0765729	0.47478
M277T254	277.07298	253.6325	diff									19565.5	14235.2	36951.7	13799.4	14535.6	12916.9	69083.7	88050.3	21223.4	7794.36	81951.5	77528.5	18667.4	57605.3	0.324057	0.0226653	1.18911
M157T320	156.99022	320.3370	nodiff									66082.3	77683.1	86437.2	59862.1	84962	60968.6	90145.6	98646.4	37917.2	28151.4	98041	65728.2	72665.9	69771.6	1.04148	0.83535	0.577704
M265T33	265.00231	32.5440	nodiff									26087	28489	3999.67	29942	62415.9	14959.5	3390.5	18091.9	15597.4	14002.5	11088	13768.5	27648.8	12656.5	2.18456	0.101031	0.558574
M197T416_1	196.88485	416.4090	nodiff									3848.56	3381.61	3530.4	3358.35	3838.5	2872.66	3652.94	4203.91	4291.4	4142.23	2268.72	2901.9	3471.68	3576.85	0.970596	0.780685	0.137159
M719T106	719.46537	106.3490	nodiff									108519	122559	108531	126696	76221.8	73988.4	127763	122857	4770.73	4412.94	192912	31984.1	102752	80783.5	1.27195	0.523345	0.881612
M117T321_1	116.95876	321.2305	nodiff									100657	113720	114551	87788.2	119803	96390.6	117435	133979	74901.8	56897.6	134959	98411.5	105485	102764	1.02648	0.850023	0.544435
M917T29	916.97490	29.1320	nodiff									5662.58	5355.74	3561.82	5165.65	846.783	21515.2	2576.23	2957.67	4332.89	2868.46	3018.24	1838.74	7017.96	2932.04	2.39355	0.204269	0.302159
M856T148	855.50485	147.7630	nodiff									56995.4	51205.2	54514	44368.2	75080.8	34568.1	50439.1	46159.8	28352.5	58188.5	52484.5	43474.5	52788.6	46516.5	1.13484	0.388106	0.0735684
M302T35	302.16676	35.0790	nodiff									6658.27	12224.1	5769.52	9288.18	12136.4	14312.6	7694.7	7981.99	4077.55	3302.89	3734.9	7025.47	10064.8	5636.25	1.78573	0.0223802	0.369573
M169T262	169.09761	262.2085	nodiff									43224.2	40305.5	33043.4	49479.7	47229.1	50817.8	52520.3	46900.3	25051.2	34632.5	52067.3	30634.3	44016.6	40301	1.0922	0.515353	0.16029
M405T139	405.26346	139.2200	nodiff									7364.98	4714.48	48482.9	80809.8	8298.62	36306.9	8772.78	16366.4	10704	6779.29	7229.35	9041.4	30996.3	9815.53	3.15788	0.119407	0.677675
M519T183	519.31977	182.9010	nodiff									9545.58	7326.64	6989.65	15240.1	12473.6	6378.39	22511.5	22552.9	19339.6	14395.9	17452.3	31376.4	9658.99	21271.4	0.454082	0.00193562	0.677498
M485T30	485.27841	29.7080	nodiff									10342.8	13225.2	11446.5	11548.3	5777.68	11047.2	8817.69	26377.7	6195.4	7269.26	12415.4	4474.58	10564.6	10925	0.967012	0.918611	0.071909
M200T31	200.00193	30.7845	nodiff									14397.6	25508.3	4296.77	5249.29	6577.55	5920.84	11005.4	16603.9	7571.88	7710.71	5550.04	3806.39	10325.1	8708.05	1.18569	0.683995	0.0720706
M286T48	286.27266	47.8600	nodiff									23378	19878.2	11503.6	12924.2	16893.6	18202.4	10444.7	17051.3	16903.1	11406.3	16045	17539.4	17130	14898.3	1.1498	0.335745	0.107598
M173T409	172.95730	409.3770	nodiff									89054.3	86720.8	123603	87817.4	61183.3	86400.6	101266	75104.6	120289	142282	90422	103053	89129.8	105403	0.845612	0.224146	1.18099
M265T418	264.88759	418.2030	nodiff									5995.89	6072.39	5181.73	6344.18	7112.33	14035.6	7245.47	7337.29	8118.44	7701.9	6706.42	7670.02	7457.02	7463.26	0.999164	0.996416	0.127912
M283T196	283.19070	196.3245	nodiff									30462.6	11033.2	12265.8	46179.9	7856.24	40707.8	5663.95	8977.79	3975.85	1684.23	9086.44	4486.87	24750.9	5645.86	4.38391	0.0195105	0.757041
M573T31_2	573.33086	30.7240	nodiff									1907.12	991.158	3149	2330.98	2261.01	3175.41	2851.24	11464	1576.84	1178.45	4250.61	909.874	2302.45	3705.17	0.621415	0.419604	0.176954
M119T415	118.94120	415.2285	nodiff									36865.9	38105.9	31430.3	34001.6	44448.8	32593	30478.2	32886.1	22872.9	20427.3	31444.2	29081.8	36240.9	27865.1	1.30059	0.0141473	0.441771
M73T238	73.02898	237.8820	nodiff									26112.9	41781.2	17330.1	27731.1	24435.2	26979.6	6525.65	8033.96	4770.57	4851.21	12295.7	5753.96	27395	7038.5	3.89217	0.000154954	0.863413
M513T35	513.28669	35.2210	nodiff									5465.46	7343.7	22369.7	27606.9	13599.4	14829.3	1260.19	3591.81	7176.45	5572.95	11460.1	1963.31	15202.4	5170.8	2.94005	0.0251445	0.489562
M999T354_1	998.85199	354.2500	nodiff									59745.3	57973.8	55278.6	65095.7	62377.5	60077.7	53498.1	58354.3	6656.4	3469.34	55036.2	23528.7	60091.4	33423.9	1.79786	0.0284859	0.991355
M228T111	228.02742	111.0560	nodiff									15402.3	33294.6	38914.9	39548.8	29007.6	45801.5	38864.1	36657.2	129811	110709	42965.5	224000	33661.6	97167.8	0.346428	0.0639296	1.5673
M270T165	270.17061	164.6850	nodiff									43642.2	10769.4	4669.55	15176.8	7711.32	18349.6	15758.6	24617.4	9254.6	8037.46	9588.43	13130.4	16719.8	13397.8	1.24795	0.60842	0.110606
M283T611	283.26341	610.9600	nodiff									114181	264376	216443	251297	261512	253374	256112	255035	270377	266549	240182	51991.5	226864	223374	1.01562	0.935169	0.505146
M496T71	496.24556	71.4670	nodiff									28459.9	24258.8	34959.9	43834.5	32734.4	17740	26938.4	25255.1	21211	11511.4	26373.6	49885.1	30331.3	26862.4	1.12913	0.596742	0.0235886
M351T40	351.32554	39.9515	nodiff									10658.7	13589.6	12058.9	21541.3	12875.2	14950.9	9769.68	10534.4	14453.1	8500.02	4219.94	7704.25	14279.1	9196.9	1.5526	0.0352696	0.340964
M225T61	225.14875	61.2210	nodiff									2015.5	6014.86	6452.78	16929.1	6367.18	2599.63	4563.19	4706.52	2513.97	10784.3	4325.62	2689.33	6729.85	4930.49	1.36495	0.490645	0.164998
M325T60	325.27381	59.9135	nodiff									14130.6	7103.98	8070.4	16236.9	6111.97	19989.4	13193.6	15324.4	20873.1	34420.1	17987.1	12534.8	11940.5	19055.5	0.626618	0.109353	0.553663
M175T277	174.99185	276.5900	nodiff									93018.5	243808	269101	283738	271461	237922	243059	331819	339629	137945	358220	246381	233175	276176	0.844299	0.359106	1.14977
M369T187	369.08171	187.1540	nodiff									8771.1	12159	2903.24	6545.63	29514.1	10301.4	7161.29	7054.79	68.7311	433.95	10606.2	2683.67	11699.1	4668.1	2.50617	0.122856	0.536513
M260T289	260.02246	289.1120	nodiff									12477.4	27001.5	12309.5	12113.1	58377.7	12054.6	13340.9	15323.8	7555.16	5108.8	13102.2	9110.4	22389	10590.2	2.11412	0.159353	0.606335
M568T33	568.40350	32.6565	nodiff									18400.1	6764.67	15986	14348	6074.79	6805.61	4392.89	4827.05	4241.51	1092.09	3278.13	1623.72	11396.5	3242.57	3.51466	0.00561686	0.460654
M69T30	68.99514	30.2850	nodiff									3850.49	3992.57	8568.25	4182.31	493.922	3970.66	9090.92	12078.1	12839.2	6443.64	12881.7	15604.7	4176.37	11489.7	0.363487	0.00147221	0.575192
M158T36	158.06064	36.3265	nodiff									24272	16868.4	31123.5	23422.1	12893.9	30686.1	25042.1	18729.4	7894.5	14738.9	17551.7	16849.7	23211	16801	1.38152	0.118274	0.341576
M180T111	180.03286	111.2190	nodiff									49080.6	72768.3	46471	47723.9	112721	36982.8	41413.8	62250.9	58742.4	28008.4	53572.4	30957	60957.9	45824.1	1.33026	0.267112	0.493045
M316T36	315.99629	36.3055	nodiff									9847.01	13756.5	10522.3	8708.72	29004.8	6057.92	8696.47	8642.63	5988.58	5587.6	7892.48	9939.35	12982.9	7791.18	1.66635	0.161466	0.338614
M809T144	808.61994	144.1505	nodiff									16108.6	18209.7	19166.7	19251.8	9267.9	16621.2	26705.4	22340.9	9611.99	7948.96	23893.4	19303.2	16437.7	18300.6	0.898201	0.608287	0.197014
M953T178	952.59272	178.0150	nodiff									4324.09	4736.59	33236.5	4920.38	1190.58	6038.8	18537.5	19483.3	5489.68	1883.78	19589	13921.7	9074.49	13150.8	0.69003	0.498495	0.27467
M631T33_1	631.42464	33.2580	diff									4124.41	1588.84	6251.39	4646.56	495.54	1194.87	32127.4	45107.6	21256.5	11377.9	30289.2	22125.3	3050.27	27047.3	0.112775	0.000539653	1.00327
M145T303	145.06061	302.8150	nodiff									16475.5	15906.3	24878.4	21709.3	20667.8	11603.9	32793.7	33504.8	23791.9	12441.4	38123.6	23389.5	18540.2	27340.8	0.678115	0.0665377	0.629368
M552T110	552.46971	109.6180	diff									18828.5	7242.88	15698.1	12087.5	7480.13	5203.19	77710.6	120238	74237.2	31078.5	81459	111226	11090	82658.3	0.134167	0.00027198	1.74401
M180T299_2	180.06473	299.2005	nodiff									54955.1	37115.8	69244.9	67832	62297.9	70550.2	50926.9	41634.1	27357	22927.4	53309.6	31755.4	60332.7	37985.1	1.58833	0.0121614	0.78024
M239T313	238.88678	312.6595	nodiff									5452.09	41646.5	5246.6	6557.49	42630.2	5785.44	48337.6	56347.2	6316.2	8883.87	4862.1	7819.94	17886.4	22094.5	0.809541	0.739709	0.463262
M404T34_1	404.28296	33.8230	nodiff									13924.7	6273.24	16830.2	17283.2	7402.15	7154.12	6243.89	7271.09	2921.01	1138.93	3766.51	3062.68	11477.9	4067.35	2.82197	0.00883549	0.441
M145T575	145.09766	574.8590	diff									290453	298457	325001	263329	340454	296932	188813	183650	102107	92888.5	149047	145380	302438	143648	2.10542	1.10451e-05	2.43973
M529T87	529.42424	87.0090	diff									37099.7	15247.5	31686.3	29554.3	13748.7	15881.8	80009.8	127737	120255	41038.1	78596.8	124163	23869.7	95299.9	0.250469	0.000659043	1.74733
M195T88	195.05147	88.2170	nodiff									5448.87	5514.41	6335.34	5896.09	6115.56	4866.54	6400.8	4803.38	3948.82	1700.07	3421.87	2089.31	5696.13	3727.37	1.52819	0.0246115	0.220198
M319T173	319.26333	173.2665	nodiff									20975.9	14428.1	33236	16271.9	7247.02	8969.49	48615	79658.9	30923.1	9734.08	21681.1	34407	16854.7	37503.2	0.449421	0.0819402	0.79277
M498T174	498.26130	174.4785	nodiff									22249.8	18752.9	17813.7	19863.5	32591.8	12749.1	25243.6	22337	14107.2	8939.09	18240.8	9930.32	20670.1	16466.4	1.2553	0.297786	0.34139
M188T244	188.08181	244.3660	nodiff									42722.2	19185.8	72058.7	13360.7	67546	43247.1	68115.5	56246.7	38629.1	32630.2	68582.1	63314	43020.1	54586.3	0.788111	0.345096	0.634248
M725T109	725.43914	108.6425	nodiff									4560.12	5557.68	3190.89	1689.29	2315.93	2096.76	4222.69	5001.17	3714.24	3941.72	1938.73	5752.94	3235.11	4095.25	0.789967	0.317915	0.181754
M695T358	694.79929	357.7930	nodiff									53257.8	51552.8	80632.4	51494.1	88062.6	57567.8	56009.8	52729.6	54201.2	32768.3	55721.3	94755.6	63761.3	57697.6	1.10509	0.579428	0.0502444
M117T20	116.92794	19.5980	nodiff									40339.4	45872	48662.6	76223.5	52716.7	39243.4	39308.3	82256.6	80927.4	79802.8	53245.8	44673.8	50509.6	63369.1	0.79707	0.219231	0.774542
M297T102	297.16874	102.0615	nodiff									34928.5	17677.5	21990	4295.52	3508.49	9587.97	28607	50012.9	2796.34	13683.5	27216.9	21253.6	15331.3	23928.4	0.640718	0.317182	0.431818
M297T109	297.20558	108.6520	nodiff									14026.7	18809.8	3798.38	4929.74	7729.27	23382	29945.5	53048.7	24950.1	14343.1	28780.5	22438.1	12112.6	28917.7	0.418866	0.0226164	0.740375
M909T354	908.91807	353.9670	diff									63579.1	56339.3	53900	70155.5	63628	62422.5	56736.6	62935.9	4258.94	1698.05	54026	21023.6	61670.7	33446.5	1.84386	0.0349312	1.02251
M786T142_1	785.53421	141.9475	nodiff									54683	46391	52060.1	49291.8	24023.7	52386.2	20419.5	32039.7	13727.1	11058.8	35958.5	21688.9	46472.6	22482.1	2.0671	0.00292227	0.843612
M755T140	755.48669	140.4340	nodiff									14812.6	29335.6	34843	13442	24720.8	15026.5	18325.9	12685.4	14433.1	15694.7	17764	13064.8	22030.1	15328	1.43725	0.106263	0.2724
M270T31	269.96045	31.3500	nodiff									8039.42	6312.73	4397.25	3614.24	18890.3	19403.5	9918.2	3592.18	8748.47	8220.43	3268.34	4209.2	10109.6	6326.14	1.59806	0.259619	0.219095
M709T140	709.48281	139.9780	nodiff									42828.7	57531	38712.1	38794.5	34068.3	33026.5	26264.4	36167.9	33489.9	23781.4	27221.6	25166.9	40826.9	28682	1.42343	0.0155	0.482997
M118T382	118.05023	381.7110	nodiff									23637.8	19614.3	37759.4	18202	13350.1	23828.4	32120.5	14570.1	13692.7	16178.8	34102	27362.1	22732	23004.4	0.98816	0.958341	0.176773
M323T42	323.29294	41.8470	nodiff									28069.1	745.673	12068.8	25223	13994.7	26357.5	3005.51	21195	19400.8	9008.11	13503	4313	17743.1	11737.6	1.51165	0.288756	0.246053
M566T181_1	566.30491	181.1360	nodiff									19635.4	16626.1	21398.8	19980.3	11810.2	19129.9	36695.1	49828.3	21062.8	9925.01	36708	28244	18096.8	30410.5	0.595083	0.0616546	0.669189
M465T172	465.18795	172.0660	nodiff									8548.95	7535.69	5310.41	7107.41	59698.5	6490.71	5515.76	19514.9	3377.46	5251.92	3999.81	2956.08	15781.9	6769.33	2.33139	0.348648	0.527751
M451T171	451.12521	171.0510	nodiff									2564.61	16773.7	67245.1	2768.83	3109.18	7939.83	3447.8	2936.73	3000.75	2160.33	2603.98	2765.89	16733.5	2819.25	5.93547	0.208358	0.448715
M126T299	126.01882	298.5375	nodiff									78060.9	55966.6	77209.8	71261.6	41827.4	67428.4	82802.6	87878.5	45562.6	27680.3	74756	69264	65292.5	64657.3	1.00982	0.95556	0.169133
M835T355	834.74981	355.2850	nodiff									1217.19	66047.3	3041.59	48966.9	2396.45	2028.55	61623	2133.03	2699.34	6416.57	3331.92	41976.8	20616.3	19696.8	1.04669	0.954847	0.0922799
M335T275	335.13352	275.3325	nodiff									1897.31	533.237	1121.13	1799.71	1690.4	494.074	9160.69	10891.8	5103.97	4831.42	53783.8	8819.7	1255.98	15431.9	0.0813883	0.0968024	0.647651
M762T177	761.58123	176.7030	nodiff									32317.3	36168.8	34250.2	38477.6	35800.9	42242.9	27188	30279.3	48568	57636.2	33608.7	24691.9	36542.9	36995.4	0.987771	0.936643	0.546264
M768T172	767.60574	171.6305	nodiff									7970.09	8110.33	31349	38258.6	30941.8	34873.1	37065.3	35091.9	17586	8476.09	32121.7	23621.9	25250.5	25660.5	0.984022	0.955627	0.248277
M342T418	341.86787	418.2330	nodiff									11531.8	9164.06	9685.86	7369.8	9461.21	17278.2	11595.2	11204.5	10108.6	10845	11352.8	11171.6	10748.5	11046.3	0.973041	0.839177	0.167455
M553T191_1	552.60144	190.7820	nodiff									11469.5	10349.1	13938.1	10204.4	8874.78	8504.04	21671.9	19550.3	20821.7	13704.6	25475.2	20317.7	10556.7	20256.9	0.521139	0.000252666	0.689937
M881T132	880.53628	132.4330	nodiff									146927	195650	93526.4	118390	133468	69104.7	80382.4	129212	34861.5	40138.6	80113.7	102264	126178	77828.6	1.62123	0.0642001	1.01845
M787T143_1	786.53482	143.4175	nodiff									23409.8	28773.4	33605.3	23837.6	16109.3	21023.2	39111.6	41344.8	35749.5	6323.85	50685.7	36816.7	24459.8	35005.3	0.698744	0.142238	0.59581
M787T139	786.50971	139.1815	nodiff									32197.5	27997.7	43313.7	31949.9	13908.2	29309	30747	40594.2	33812.3	23455.7	53458.6	34502.9	29779.3	36095.1	0.825024	0.291945	0.540909
M445T63	445.33132	62.7880	diff									7513.9	2756.14	12658.6	6230.7	2471.24	1290.25	30878.7	42640.6	36860.4	17857.8	26156.6	34631.8	5486.8	31504.3	0.17416	6.17417e-05	1.08346
M747T64	746.51270	63.8990	nodiff									22039.3	18161.6	29154.2	23490.9	22828.8	10977.5	63083.1	62226.9	6578.3	6889.84	28612.1	7047.31	21108.7	29072.9	0.726061	0.502109	0.493641
M448T51	448.24604	51.2200	nodiff									16869.8	22481.6	34814.4	23056.3	18306.2	16041.9	24892.8	41884.9	12772.2	5080.35	21105.3	10049.3	21928.4	19297.5	1.13633	0.67536	0.204475
M291T26	291.03548	25.8745	nodiff									13193.3	4856.79	4883.2	3533.61	4144.72	2828.64	19502.8	25158	16411.7	8602.22	20847.9	13032.7	5573.37	17259.2	0.322921	0.00222942	0.71052
M753T355	752.84171	354.6225	nodiff									81428.5	78952.9	82081.4	82313.7	81946	82379.5	81810.6	82153.9	21564.4	9458.14	77027.8	54106.7	81517	54353.6	1.49975	0.0647179	0.944624
M1020T190	1019.61197	190.1960	nodiff									10350.6	6851.23	17270.7	11983.8	7256.68	6718.49	20131.1	19299.1	16129.9	6862.97	19029.9	15690.4	10071.9	16190.6	0.622086	0.0415386	0.504227
M733T139_2	733.49120	139.2930	nodiff									40681.8	41273.2	106217	52914.5	48475.4	24506.2	62848	48075.2	47192.8	41220.9	105131	64045.2	52344.6	61418.9	0.852256	0.556066	0.559399
M816T108	815.53301	107.7195	nodiff									51944.8	38329.9	18103.2	48910.6	19036.2	22011.8	9101.75	13289.7	12755.2	15151.3	15548.5	34561.1	33056.1	16734.6	1.97532	0.0485954	0.573801
M832T190	831.50331	189.5480	nodiff									22271.9	13912.4	12478.7	19403.5	11429.2	12519.2	25010.5	35390.2	7451.24	8296.76	28111.2	18377.6	15335.8	20439.6	0.750299	0.322578	0.399356
M95T171	94.98043	171.2245	nodiff									46256.6	50017.2	27838.5	74641.7	90046.1	41063	48238.1	105153	38294.9	19010	66763.5	34910.7	54977.2	52061.8	1.056	0.855214	0.63772
[truncated: 8,384 more rows]

## Sheet: NEG|WMW_vs_MOD
ID	m/z	rt(s)	diff	Name	adduct	score	HMDB	KEGG	SuperClass	Class	SubClass	W1	W2	W3	W5	W6	W7	M1	M2	M3	M4	M5	M6	Average(WMW)	Average(MOD)	Fold change	p-value	VIP
[truncated: 10,196 more rows]

[truncated: 3 more sheets: POS|MOD_vs_Control, POS|WMW_vs_MOD, KEGG|WMW_vs_MOD]
